# Supplementary material
Source: publisher site journal article supplement (https://www.spandidos-publications.com/1914/downloadSupplementary)
Supplement: Supplementary file 1 [file downloadSupplementary]

## Sheet: Up_GO_Enrichment
GO_ID	GO_Name	Population_mapped_id	study_mapped_id	enrichment	p_value	FDR
GO:0007155	cell adhesion	415	15	4.54888	4.07677e-06	0.000604653
GO:0007160	cell-matrix adhesion	91	7	9.68095	1.62743e-05	0.000727204
GO:0048251	elastic fiber assembly	7	3	53.9367	5.86161e-05	0.00167747
GO:0090084	negative regulation of inclusion body assembly	9	3	41.9508	0.000106167	0.0029392
GO:0046034	ATP metabolic process	29	4	17.3589	0.000139766	0.00367098
GO:0006986	response to unfolded protein	42	4	11.9859	0.00051245	0.00815757
GO:0009624	response to nematode	3	2	83.9016	0.000623781	0.00945696
GO:0070434	positive regulation of nucleotide-binding oligomerization domain containing 2 signaling pathway	3	2	83.9016	0.000623781	0.00945696
GO:0070370	cellular heat acclimation	4	2	62.9262	0.000930666	0.012676
GO:0071395	cellular response to jasmonic acid stimulus	4	2	62.9262	0.000930666	0.012676
GO:0030198	extracellular matrix organization	307	9	3.68948	0.00123886	0.0160989
GO:0060157	urinary bladder development	5	2	50.3409	0.00129597	0.0165042
GO:0090131	mesenchyme migration	5	2	50.3409	0.00129597	0.0165042
GO:0016337	single organismal cell-cell adhesion	95	5	6.62381	0.00132913	0.0165136
GO:1903265	positive regulation of tumor necrosis factor-mediated signaling pathway	6	2	41.9508	0.00171873	0.0173692
GO:0045773	positive regulation of axon extension	28	3	13.4842	0.00193405	0.0173692
GO:0001654	eye development	28	3	13.4842	0.00193405	0.0173692
GO:0034605	cellular response to heat	105	5	5.99297	0.00202104	0.0174778
GO:0044597	daunorubicin metabolic process	8	2	31.4631	0.00273284	0.0211653
GO:0042448	progesterone metabolic process	8	2	31.4631	0.00273284	0.0211653
GO:0009308	amine metabolic process	8	2	31.4631	0.00273284	0.0211653
GO:0044598	doxorubicin metabolic process	8	2	31.4631	0.00273284	0.0211653
GO:0030334	regulation of cell migration	68	4	7.40308	0.00273396	0.0211653
GO:0010033	response to organic substance	33	3	11.4411	0.00298124	0.0228712
GO:0045907	positive regulation of vasoconstriction	34	3	11.1046	0.0032249	0.0244771
GO:0001666	response to hypoxia	171	6	4.41587	0.00327707	0.0244771
GO:1900034	regulation of cellular response to heat	75	4	6.71213	0.0038183	0.0280265
GO:0006805	xenobiotic metabolic process	178	6	4.24221	0.00395543	0.0282922
GO:0010941	regulation of cell death	10	2	25.1705	0.00396558	0.0282922
GO:0031953	negative regulation of protein autophosphorylation	10	2	25.1705	0.00396558	0.0282922
GO:0030049	muscle filament sliding	38	3	9.93571	0.00431965	0.030279
GO:0030199	collagen fibril organization	38	3	9.93571	0.00431965	0.030279
GO:0006693	prostaglandin metabolic process	11	2	22.8822	0.00466165	0.0318317
GO:0051481	negative regulation of cytosolic calcium ion concentration	11	2	22.8822	0.00466165	0.0318317
GO:0048565	digestive tract development	40	3	9.43893	0.00494136	0.0331956
GO:0022011	myelination in peripheral nervous system	13	2	19.3619	0.00620875	0.0404442
GO:0043206	extracellular fibril organization	13	2	19.3619	0.00620875	0.0404442
GO:0060065	uterus development	13	2	19.3619	0.00620875	0.0404442
GO:0019079	viral genome replication	14	2	17.9789	0.00705803	0.0444971
GO:0006940	regulation of smooth muscle contraction	14	2	17.9789	0.00705803	0.0444971
GO:0031396	regulation of protein ubiquitination	15	2	16.7803	0.00795666	0.0487154
GO:0015695	organic cation transport	15	2	16.7803	0.00795666	0.0487154
GO:0042026	protein refolding	15	2	16.7803	0.00795666	0.0487154
GO:0061337	cardiac conduction	95	4	5.29905	0.00842469	0.0510898
GO:0060548	negative regulation of cell death	51	3	7.40308	0.00930113	0.0557411
GO:0030168	platelet activation	217	6	3.47979	0.00975505	0.0569865
GO:0006855	drug transmembrane transport	17	2	14.8062	0.00989854	0.0574529
GO:0031032	actomyosin structure organization	18	2	13.9836	0.0109401	0.0617839
GO:0071880	adenylate cyclase-activating adrenergic receptor signaling pathway	19	2	13.2476	0.0120278	0.0667359
GO:0006936	muscle contraction	106	4	4.74915	0.0120528	0.0667359
GO:0010628	positive regulation of gene expression	229	6	3.29744	0.0123622	0.0675678
GO:0008284	positive regulation of cell proliferation	448	9	2.52828	0.0128792	0.0689844
GO:0006952	defense response	58	3	6.5096	0.0129464	0.0689844
GO:0030325	adrenal gland development	20	2	12.5852	0.0131606	0.0694137
GO:0045671	negative regulation of osteoclast differentiation	21	2	11.9859	0.0143378	0.0740126
GO:0048870	cell motility	21	2	11.9859	0.0143378	0.0740126
GO:0009611	response to wounding	61	3	6.18946	0.0147236	0.0740126
GO:0045987	positive regulation of smooth muscle contraction	22	2	11.4411	0.0155587	0.0740126
GO:0051615	histamine uptake	1	1	125.852	0.0158079	0.0740126
GO:0070237	positive regulation of activation-induced cell death of T cells	1	1	125.852	0.0158079	0.0740126
GO:0009720	detection of hormone stimulus	1	1	125.852	0.0158079	0.0740126
GO:1902380	positive regulation of endoribonuclease activity	1	1	125.852	0.0158079	0.0740126
GO:0090101	negative regulation of transmembrane receptor protein serine/threonine kinase signaling pathway	1	1	125.852	0.0158079	0.0740126
GO:0033275	actin-myosin filament sliding	1	1	125.852	0.0158079	0.0740126
GO:0051695	actin filament uncapping	1	1	125.852	0.0158079	0.0740126
GO:0038133	ERBB2-ERBB3 signaling pathway	1	1	125.852	0.0158079	0.0740126
GO:0032812	positive regulation of epinephrine secretion	1	1	125.852	0.0158079	0.0740126
GO:0042637	catagen	1	1	125.852	0.0158079	0.0740126
GO:0071971	extracellular exosome assembly	1	1	125.852	0.0158079	0.0740126
GO:0072389	flavin adenine dinucleotide catabolic process	1	1	125.852	0.0158079	0.0740126
GO:0019341	dibenzo-p-dioxin catabolic process	1	1	125.852	0.0158079	0.0740126
GO:0045209	MAPK phosphatase export from nucleus, leptomycin B sensitive	1	1	125.852	0.0158079	0.0740126
GO:1900239	regulation of phenotypic switching	1	1	125.852	0.0158079	0.0740126
GO:0018917	fluorene metabolic process	1	1	125.852	0.0158079	0.0740126
GO:1903007	positive regulation of Lys63-specific deubiquitinase activity	1	1	125.852	0.0158079	0.0740126
GO:0010712	regulation of collagen metabolic process	1	1	125.852	0.0158079	0.0740126
GO:0014734	skeletal muscle hypertrophy	1	1	125.852	0.0158079	0.0740126
GO:1903280	negative regulation of calcium:sodium antiporter activity	1	1	125.852	0.0158079	0.0740126
GO:1990079	cartilage homeostasis	1	1	125.852	0.0158079	0.0740126
GO:0021793	chemorepulsion of branchiomotor axon	1	1	125.852	0.0158079	0.0740126
GO:1904722	positive regulation of mRNA endonucleolytic cleavage involved in unfolded protein response	1	1	125.852	0.0158079	0.0740126
GO:0072254	metanephric glomerular mesangial cell differentiation	1	1	125.852	0.0158079	0.0740126
GO:0043954	cellular component maintenance	1	1	125.852	0.0158079	0.0740126
GO:0098542	defense response to other organism	1	1	125.852	0.0158079	0.0740126
GO:1900035	negative regulation of cellular response to heat	1	1	125.852	0.0158079	0.0740126
GO:1903141	negative regulation of establishment of endothelial barrier	1	1	125.852	0.0158079	0.0740126
GO:1903006	positive regulation of protein K63-linked deubiquitination	1	1	125.852	0.0158079	0.0740126
GO:0071228	cellular response to tumor cell	1	1	125.852	0.0158079	0.0740126
GO:0034633	retinol transport	1	1	125.852	0.0158079	0.0740126
GO:0050923	regulation of negative chemotaxis	1	1	125.852	0.0158079	0.0740126
GO:0048488	synaptic vesicle endocytosis	23	2	10.9437	0.0168224	0.0766167
GO:0007186	G-protein coupled receptor signaling pathway	888	14	1.98416	0.0170861	0.0766167
GO:0030593	neutrophil chemotaxis	65	3	5.80857	0.0172966	0.077153
GO:0008217	regulation of blood pressure	66	3	5.72056	0.0179763	0.079766
GO:0048041	focal adhesion assembly	24	2	10.4877	0.0181282	0.0798832
GO:0008360	regulation of cell shape	122	4	4.12631	0.0188962	0.0826954
GO:2001238	positive regulation of extrinsic apoptotic signaling pathway	25	2	10.0682	0.0194753	0.0846478
GO:0030855	epithelial cell differentiation	71	3	5.3177	0.021595	0.0929096
GO:0032757	positive regulation of interleukin-8 production	27	2	9.3224	0.0222905	0.0929727
GO:0045214	sarcomere organization	27	2	9.3224	0.0222905	0.0929727
GO:0016339	calcium-dependent cell-cell adhesion via plasma membrane cell adhesion molecules	27	2	9.3224	0.0222905	0.0929727
GO:0060931	sinoatrial node cell development	2	1	62.9262	0.0236173	0.0929727
GO:0070253	somatostatin secretion	2	1	62.9262	0.0236173	0.0929727
GO:0021681	cerebellar granular layer development	2	1	62.9262	0.0236173	0.0929727
GO:0002067	glandular epithelial cell differentiation	2	1	62.9262	0.0236173	0.0929727
GO:0010041	response to iron(III) ion	2	1	62.9262	0.0236173	0.0929727
GO:1902532	negative regulation of intracellular signal transduction	2	1	62.9262	0.0236173	0.0929727
GO:0070473	negative regulation of uterine smooth muscle contraction	2	1	62.9262	0.0236173	0.0929727
GO:0032490	detection of molecule of bacterial origin	2	1	62.9262	0.0236173	0.0929727
GO:0009115	xanthine catabolic process	2	1	62.9262	0.0236173	0.0929727
GO:0021644	vagus nerve morphogenesis	2	1	62.9262	0.0236173	0.0929727
GO:0071657	positive regulation of granulocyte colony-stimulating factor production	2	1	62.9262	0.0236173	0.0929727
GO:1900168	positive regulation of glial cell-derived neurotrophic factor secretion	2	1	62.9262	0.0236173	0.0929727
GO:0051946	regulation of glutamate uptake involved in transmission of nerve impulse	2	1	62.9262	0.0236173	0.0929727
GO:1904426	positive regulation of GTP binding	2	1	62.9262	0.0236173	0.0929727
GO:0021784	postganglionic parasympathetic fiber development	2	1	62.9262	0.0236173	0.0929727
GO:0055099	response to high density lipoprotein particle	2	1	62.9262	0.0236173	0.0929727
GO:0060973	cell migration involved in heart development	2	1	62.9262	0.0236173	0.0929727
GO:0086097	phospholipase C-activating angiotensin-activated signaling pathway	2	1	62.9262	0.0236173	0.0929727
GO:0043241	protein complex disassembly	2	1	62.9262	0.0236173	0.0929727
GO:0010872	regulation of cholesterol esterification	2	1	62.9262	0.0236173	0.0929727
GO:2000724	positive regulation of cardiac vascular smooth muscle cell differentiation	2	1	62.9262	0.0236173	0.0929727
GO:0040017	positive regulation of locomotion	2	1	62.9262	0.0236173	0.0929727
GO:0045204	MAPK export from nucleus	2	1	62.9262	0.0236173	0.0929727
GO:0017143	insecticide metabolic process	2	1	62.9262	0.0236173	0.0929727
GO:1903263	positive regulation of serine phosphorylation of STAT3 protein	2	1	62.9262	0.0236173	0.0929727
GO:1900038	negative regulation of cellular response to hypoxia	2	1	62.9262	0.0236173	0.0929727
GO:0061162	establishment of monopolar cell polarity	2	1	62.9262	0.0236173	0.0929727
GO:0042704	uterine wall breakdown	2	1	62.9262	0.0236173	0.0929727
GO:0035733	hepatic stellate cell activation	2	1	62.9262	0.0236173	0.0929727
GO:0035051	cardiocyte differentiation	2	1	62.9262	0.0236173	0.0929727
GO:0035759	mesangial cell-matrix adhesion	2	1	62.9262	0.0236173	0.0929727
GO:0032488	Cdc42 protein signal transduction	2	1	62.9262	0.0236173	0.0929727
GO:0048008	platelet-derived growth factor receptor signaling pathway	28	2	8.98945	0.0237572	0.0932351
GO:0001558	regulation of cell growth	74	3	5.10212	0.0239423	0.0935293
GO:0046326	positive regulation of glucose import	29	2	8.67947	0.0252622	0.0974567
GO:0010951	negative regulation of endopeptidase activity	134	4	3.75679	0.0253303	0.0974567
GO:0098779	mitophagy in response to mitochondrial depolarization	134	4	3.75679	0.0253303	0.0974567
GO:0030324	lung development	77	3	4.90334	0.0264215	0.100282
GO:0016311	dephosphorylation	78	3	4.84047	0.0272772	0.100282
GO:0006766	vitamin metabolic process	138	4	3.64789	0.0277322	0.100282
GO:0046677	response to antibiotic	31	2	8.11951	0.0283847	0.100282
GO:0060325	face morphogenesis	31	2	8.11951	0.0283847	0.100282
GO:0008283	cell proliferation	359	7	2.45395	0.029709	0.100282
GO:2001240	negative regulation of extrinsic apoptotic signaling pathway in absence of ligand	32	2	7.86577	0.0300007	0.100282
GO:0072593	reactive oxygen species metabolic process	32	2	7.86577	0.0300007	0.100282
GO:0007229	integrin-mediated signaling pathway	82	3	4.60435	0.0308455	0.100282
GO:0043506	regulation of JUN kinase activity	3	1	41.9508	0.0313644	0.100282
GO:0045988	negative regulation of striated muscle contraction	3	1	41.9508	0.0313644	0.100282
GO:1900222	negative regulation of beta-amyloid clearance	3	1	41.9508	0.0313644	0.100282
GO:0035745	T-helper 2 cell cytokine production	3	1	41.9508	0.0313644	0.100282
GO:1903170	negative regulation of calcium ion transmembrane transport	3	1	41.9508	0.0313644	0.100282
GO:0019062	virion attachment to host cell	3	1	41.9508	0.0313644	0.100282
GO:0010002	cardioblast differentiation	3	1	41.9508	0.0313644	0.100282
GO:1903659	regulation of complement-dependent cytotoxicity	3	1	41.9508	0.0313644	0.100282
GO:0046968	peptide antigen transport	3	1	41.9508	0.0313644	0.100282
GO:2001015	negative regulation of skeletal muscle cell differentiation	3	1	41.9508	0.0313644	0.100282
GO:0071883	activation of MAPK activity by adrenergic receptor signaling pathway	3	1	41.9508	0.0313644	0.100282
GO:0035886	vascular smooth muscle cell differentiation	3	1	41.9508	0.0313644	0.100282
GO:0051795	positive regulation of catagen	3	1	41.9508	0.0313644	0.100282
GO:0006931	substrate-dependent cell migration, cell attachment to substrate	3	1	41.9508	0.0313644	0.100282
GO:0032651	regulation of interleukin-1 beta production	3	1	41.9508	0.0313644	0.100282
GO:0032642	regulation of chemokine production	3	1	41.9508	0.0313644	0.100282
GO:0048807	female genitalia morphogenesis	3	1	41.9508	0.0313644	0.100282
GO:0019538	protein metabolic process	3	1	41.9508	0.0313644	0.100282
GO:2000721	positive regulation of transcription from RNA polymerase II promoter involved in smooth muscle cell differentiation	3	1	41.9508	0.0313644	0.100282
GO:0034436	glycoprotein transport	3	1	41.9508	0.0313644	0.100282
GO:1900138	negative regulation of phospholipase A2 activity	3	1	41.9508	0.0313644	0.100282
GO:0009792	embryo development ending in birth or egg hatching	3	1	41.9508	0.0313644	0.100282
GO:0070988	demethylation	3	1	41.9508	0.0313644	0.100282
GO:0045726	positive regulation of integrin biosynthetic process	3	1	41.9508	0.0313644	0.100282
GO:0010693	negative regulation of alkaline phosphatase activity	3	1	41.9508	0.0313644	0.100282
GO:0042816	vitamin B6 metabolic process	3	1	41.9508	0.0313644	0.100282
GO:0070093	negative regulation of glucagon secretion	3	1	41.9508	0.0313644	0.100282
GO:0030505	inorganic diphosphate transport	3	1	41.9508	0.0313644	0.100282
GO:1903416	response to glycoside	3	1	41.9508	0.0313644	0.100282
GO:0001560	regulation of cell growth by extracellular stimulus	3	1	41.9508	0.0313644	0.100282
GO:0072011	glomerular endothelium development	3	1	41.9508	0.0313644	0.100282
GO:0003192	mitral valve formation	3	1	41.9508	0.0313644	0.100282
GO:0010718	positive regulation of epithelial to mesenchymal transition	33	2	7.62742	0.0316523	0.100282
GO:0046718	viral entry into host cell	83	3	4.54888	0.0317738	0.100282
GO:0002576	platelet degranulation	83	3	4.54888	0.0317738	0.100282
GO:0007411	axon guidance	537	9	2.10926	0.0345348	0.107007
GO:1901998	toxin transport	35	2	7.19156	0.0350596	0.107846
GO:0048286	lung alveolus development	35	2	7.19156	0.0350596	0.107846
GO:0022008	neurogenesis	35	2	7.19156	0.0350596	0.107846
GO:0007517	muscle organ development	88	3	4.29042	0.0366315	0.111603
GO:0007156	homophilic cell adhesion via plasma membrane adhesion molecules	154	4	3.26889	0.0386525	0.112638
GO:0035625	epidermal growth factor-activated receptor transactivation by G-protein coupled receptor signaling pathway	4	1	31.4631	0.0390495	0.112638
GO:0030035	microspike assembly	4	1	31.4631	0.0390495	0.112638
GO:0038001	paracrine signaling	4	1	31.4631	0.0390495	0.112638
GO:0021615	glossopharyngeal nerve morphogenesis	4	1	31.4631	0.0390495	0.112638
GO:1903862	positive regulation of oxidative phosphorylation	4	1	31.4631	0.0390495	0.112638
GO:0046683	response to organophosphorus	4	1	31.4631	0.0390495	0.112638
GO:0030730	sequestering of triglyceride	4	1	31.4631	0.0390495	0.112638
GO:1900041	negative regulation of interleukin-2 secretion	4	1	31.4631	0.0390495	0.112638
GO:0071248	cellular response to metal ion	4	1	31.4631	0.0390495	0.112638
GO:2001137	positive regulation of endocytic recycling	4	1	31.4631	0.0390495	0.112638
GO:0045661	regulation of myoblast differentiation	4	1	31.4631	0.0390495	0.112638
GO:2001135	regulation of endocytic recycling	4	1	31.4631	0.0390495	0.112638
GO:0010918	positive regulation of mitochondrial membrane potential	4	1	31.4631	0.0390495	0.112638
GO:0001994	norepinephrine-epinephrine vasoconstriction involved in regulation of systemic arterial blood pressure	4	1	31.4631	0.0390495	0.112638
GO:0019695	choline metabolic process	4	1	31.4631	0.0390495	0.112638
GO:0032387	negative regulation of intracellular transport	4	1	31.4631	0.0390495	0.112638
GO:0003257	positive regulation of transcription from RNA polymerase II promoter involved in myocardial precursor cell differentiation	4	1	31.4631	0.0390495	0.112638
GO:0061041	regulation of wound healing	4	1	31.4631	0.0390495	0.112638
GO:0009988	cell-cell recognition	4	1	31.4631	0.0390495	0.112638
GO:0042904	9-cis-retinoic acid biosynthetic process	4	1	31.4631	0.0390495	0.112638
GO:0009987	cellular process	4	1	31.4631	0.0390495	0.112638
GO:0051152	positive regulation of smooth muscle cell differentiation	4	1	31.4631	0.0390495	0.112638
GO:0018879	biphenyl metabolic process	4	1	31.4631	0.0390495	0.112638
GO:1990573	potassium ion import across plasma membrane	4	1	31.4631	0.0390495	0.112638
GO:0003273	cell migration involved in endocardial cushion formation	4	1	31.4631	0.0390495	0.112638
GO:0032909	regulation of transforming growth factor beta2 production	4	1	31.4631	0.0390495	0.112638
GO:0007219	Notch signaling pathway	156	4	3.22698	0.0401663	0.114819
GO:0001942	hair follicle development	38	2	6.62381	0.040421	0.115031
GO:0051781	positive regulation of cell division	38	2	6.62381	0.040421	0.115031
GO:0032570	response to progesterone	40	2	6.29262	0.0441548	0.125376
GO:0061042	vascular wound healing	5	1	25.1705	0.0466733	0.126196
GO:0033564	anterior/posterior axon guidance	5	1	25.1705	0.0466733	0.126196
GO:0009804	coumarin metabolic process	5	1	25.1705	0.0466733	0.126196
GO:0015697	quaternary ammonium group transport	5	1	25.1705	0.0466733	0.126196
GO:0006572	tyrosine catabolic process	5	1	25.1705	0.0466733	0.126196
GO:0010936	negative regulation of macrophage cytokine production	5	1	25.1705	0.0466733	0.126196
GO:0006771	riboflavin metabolic process	5	1	25.1705	0.0466733	0.126196
GO:0048562	embryonic organ morphogenesis	5	1	25.1705	0.0466733	0.126196
GO:0035860	glial cell-derived neurotrophic factor receptor signaling pathway	5	1	25.1705	0.0466733	0.126196
GO:0042482	positive regulation of odontogenesis	5	1	25.1705	0.0466733	0.126196
GO:0060613	fat pad development	5	1	25.1705	0.0466733	0.126196
GO:0021960	anterior commissure morphogenesis	5	1	25.1705	0.0466733	0.126196
GO:0038031	non-canonical Wnt signaling pathway via JNK cascade	5	1	25.1705	0.0466733	0.126196
GO:0032367	intracellular cholesterol transport	5	1	25.1705	0.0466733	0.126196
GO:0003179	heart valve morphogenesis	5	1	25.1705	0.0466733	0.126196
GO:0071799	cellular response to prostaglandin D stimulus	5	1	25.1705	0.0466733	0.126196
GO:0051891	positive regulation of cardioblast differentiation	5	1	25.1705	0.0466733	0.126196
GO:0035791	platelet-derived growth factor receptor-beta signaling pathway	5	1	25.1705	0.0466733	0.126196
GO:0070863	positive regulation of protein exit from endoplasmic reticulum	5	1	25.1705	0.0466733	0.126196
GO:0006068	ethanol catabolic process	5	1	25.1705	0.0466733	0.126196
GO:0045823	positive regulation of heart contraction	5	1	25.1705	0.0466733	0.126196
GO:2001028	positive regulation of endothelial cell chemotaxis	5	1	25.1705	0.0466733	0.126196
GO:0021637	trigeminal nerve structural organization	5	1	25.1705	0.0466733	0.126196
GO:0060603	mammary gland duct morphogenesis	5	1	25.1705	0.0466733	0.126196
GO:1901029	negative regulation of mitochondrial outer membrane permeabilization involved in apoptotic signaling pathway	5	1	25.1705	0.0466733	0.126196
GO:2001171	positive regulation of ATP biosynthetic process	5	1	25.1705	0.0466733	0.126196
GO:0030240	skeletal muscle thin filament assembly	5	1	25.1705	0.0466733	0.126196
GO:0045542	positive regulation of cholesterol biosynthetic process	5	1	25.1705	0.0466733	0.126196
GO:0038033	positive regulation of endothelial cell chemotaxis by VEGF-activated vascular endothelial growth factor receptor signaling pathway	5	1	25.1705	0.0466733	0.126196
GO:0040012	regulation of locomotion	5	1	25.1705	0.0466733	0.126196
GO:0009143	nucleoside triphosphate catabolic process	5	1	25.1705	0.0466733	0.126196
GO:0040023	establishment of nucleus localization	5	1	25.1705	0.0466733	0.126196
GO:0070842	aggresome assembly	5	1	25.1705	0.0466733	0.126196
GO:0003231	cardiac ventricle development	5	1	25.1705	0.0466733	0.126196
GO:0001504	neurotransmitter uptake	5	1	25.1705	0.0466733	0.126196
GO:0070389	chaperone cofactor-dependent protein refolding	5	1	25.1705	0.0466733	0.126196
GO:0031397	negative regulation of protein ubiquitination	42	2	5.99297	0.0480103	0.128718
GO:0007165	signal transduction	1036	14	1.70071	0.0490039	0.129474
GO:0051091	positive regulation of sequence-specific DNA binding transcription factor activity	102	3	3.70154	0.0521043	0.136955
GO:0007157	heterophilic cell-cell adhesion via plasma membrane cell adhesion molecules	45	2	5.59344	0.0540114	0.137726
GO:0061154	endothelial tube morphogenesis	6	1	20.9754	0.0542362	0.137726
GO:0071636	positive regulation of transforming growth factor beta production	6	1	20.9754	0.0542362	0.137726
GO:0055012	ventricular cardiac muscle cell differentiation	6	1	20.9754	0.0542362	0.137726
GO:0060706	cell differentiation involved in embryonic placenta development	6	1	20.9754	0.0542362	0.137726
GO:0048553	negative regulation of metalloenzyme activity	6	1	20.9754	0.0542362	0.137726
GO:2001259	positive regulation of cation channel activity	6	1	20.9754	0.0542362	0.137726
GO:0032224	positive regulation of synaptic transmission, cholinergic	6	1	20.9754	0.0542362	0.137726
GO:0051150	regulation of smooth muscle cell differentiation	6	1	20.9754	0.0542362	0.137726
GO:0071286	cellular response to magnesium ion	6	1	20.9754	0.0542362	0.137726
GO:0043615	astrocyte cell migration	6	1	20.9754	0.0542362	0.137726
GO:0003158	endothelium development	6	1	20.9754	0.0542362	0.137726
GO:0071712	ER-associated misfolded protein catabolic process	6	1	20.9754	0.0542362	0.137726
GO:0009812	flavonoid metabolic process	6	1	20.9754	0.0542362	0.137726
GO:2000427	positive regulation of apoptotic cell clearance	6	1	20.9754	0.0542362	0.137726
GO:1903715	regulation of aerobic respiration	6	1	20.9754	0.0542362	0.137726
GO:0043031	negative regulation of macrophage activation	6	1	20.9754	0.0542362	0.137726
GO:0061037	negative regulation of cartilage development	6	1	20.9754	0.0542362	0.137726
GO:0010887	negative regulation of cholesterol storage	6	1	20.9754	0.0542362	0.137726
GO:0051045	negative regulation of membrane protein ectodomain proteolysis	6	1	20.9754	0.0542362	0.137726
GO:1901385	regulation of voltage-gated calcium channel activity	6	1	20.9754	0.0542362	0.137726
GO:0055013	cardiac muscle cell development	6	1	20.9754	0.0542362	0.137726
GO:0097070	ductus arteriosus closure	6	1	20.9754	0.0542362	0.137726
GO:0035065	regulation of histone acetylation	6	1	20.9754	0.0542362	0.137726
GO:0098792	xenophagy	105	3	3.59578	0.0557676	0.140773
GO:0007193	adenylate cyclase-inhibiting G-protein coupled receptor signaling pathway	46	2	5.47184	0.0560674	0.140971
GO:0007267	cell-cell signaling	252	5	2.49707	0.0567886	0.142083
GO:0060048	cardiac muscle contraction	47	2	5.35542	0.0581504	0.14507
GO:0045766	positive regulation of angiogenesis	107	3	3.52857	0.0582758	0.14507
GO:0006956	complement activation	48	2	5.24385	0.0602597	0.145735
GO:0032963	collagen metabolic process	7	1	17.9789	0.0617386	0.145735
GO:0060907	positive regulation of macrophage cytokine production	7	1	17.9789	0.0617386	0.145735
GO:0090091	positive regulation of extracellular matrix disassembly	7	1	17.9789	0.0617386	0.145735
GO:0006927	transformed cell apoptotic process	7	1	17.9789	0.0617386	0.145735
GO:2000121	regulation of removal of superoxide radicals	7	1	17.9789	0.0617386	0.145735
GO:0060059	embryonic retina morphogenesis in camera-type eye	7	1	17.9789	0.0617386	0.145735
GO:0045162	clustering of voltage-gated sodium channels	7	1	17.9789	0.0617386	0.145735
GO:0043931	ossification involved in bone maturation	7	1	17.9789	0.0617386	0.145735
GO:0051971	positive regulation of transmission of nerve impulse	7	1	17.9789	0.0617386	0.145735
GO:0048644	muscle organ morphogenesis	7	1	17.9789	0.0617386	0.145735
GO:0040011	locomotion	7	1	17.9789	0.0617386	0.145735
GO:0050891	multicellular organismal water homeostasis	7	1	17.9789	0.0617386	0.145735
GO:0015872	dopamine transport	7	1	17.9789	0.0617386	0.145735
GO:0045822	negative regulation of heart contraction	7	1	17.9789	0.0617386	0.145735
GO:0072089	stem cell proliferation	7	1	17.9789	0.0617386	0.145735
GO:0002377	immunoglobulin production	7	1	17.9789	0.0617386	0.145735
GO:0051782	negative regulation of cell division	7	1	17.9789	0.0617386	0.145735
GO:0007197	adenylate cyclase-inhibiting G-protein coupled acetylcholine receptor signaling pathway	7	1	17.9789	0.0617386	0.145735
GO:0019388	galactose catabolic process	7	1	17.9789	0.0617386	0.145735
GO:0048841	regulation of axon extension involved in axon guidance	7	1	17.9789	0.0617386	0.145735
GO:2000727	positive regulation of cardiac muscle cell differentiation	7	1	17.9789	0.0617386	0.145735
GO:0048699	generation of neurons	7	1	17.9789	0.0617386	0.145735
GO:0002438	acute inflammatory response to antigenic stimulus	7	1	17.9789	0.0617386	0.145735
GO:1901017	negative regulation of potassium ion transmembrane transporter activity	7	1	17.9789	0.0617386	0.145735
GO:1901018	positive regulation of potassium ion transmembrane transporter activity	7	1	17.9789	0.0617386	0.145735
GO:0007435	salivary gland morphogenesis	7	1	17.9789	0.0617386	0.145735
GO:0042129	regulation of T cell proliferation	7	1	17.9789	0.0617386	0.145735
GO:0006775	fat-soluble vitamin metabolic process	49	2	5.13683	0.0623948	0.147012
GO:0006955	immune response	346	6	2.18241	0.0655309	0.153267
GO:0045471	response to ethanol	114	3	3.3119	0.06746	0.155933
GO:0030097	hemopoiesis	52	2	4.84047	0.0689494	0.155933
GO:0000902	cell morphogenesis	52	2	4.84047	0.0689494	0.155933
GO:0030643	cellular phosphate ion homeostasis	8	1	15.7315	0.0691812	0.155933
GO:0015884	folic acid transport	8	1	15.7315	0.0691812	0.155933
GO:0021612	facial nerve structural organization	8	1	15.7315	0.0691812	0.155933
GO:0042987	amyloid precursor protein catabolic process	8	1	15.7315	0.0691812	0.155933
GO:0050665	hydrogen peroxide biosynthetic process	8	1	15.7315	0.0691812	0.155933
GO:0050650	chondroitin sulfate proteoglycan biosynthetic process	8	1	15.7315	0.0691812	0.155933
GO:0034214	protein hexamerization	8	1	15.7315	0.0691812	0.155933
GO:0007207	phospholipase C-activating G-protein coupled acetylcholine receptor signaling pathway	8	1	15.7315	0.0691812	0.155933
GO:0008228	opsonization	8	1	15.7315	0.0691812	0.155933
GO:0032926	negative regulation of activin receptor signaling pathway	8	1	15.7315	0.0691812	0.155933
GO:0051013	microtubule severing	8	1	15.7315	0.0691812	0.155933
GO:0051085	chaperone mediated protein folding requiring cofactor	8	1	15.7315	0.0691812	0.155933
GO:0061049	cell growth involved in cardiac muscle cell development	8	1	15.7315	0.0691812	0.155933
GO:0030432	peristalsis	8	1	15.7315	0.0691812	0.155933
GO:0032731	positive regulation of interleukin-1 beta production	8	1	15.7315	0.0691812	0.155933
GO:0006734	NADH metabolic process	8	1	15.7315	0.0691812	0.155933
GO:0032811	negative regulation of epinephrine secretion	8	1	15.7315	0.0691812	0.155933
GO:0046903	secretion	8	1	15.7315	0.0691812	0.155933
GO:0071313	cellular response to caffeine	8	1	15.7315	0.0691812	0.155933
GO:0045719	negative regulation of glycogen biosynthetic process	8	1	15.7315	0.0691812	0.155933
GO:0071493	cellular response to UV-B	8	1	15.7315	0.0691812	0.155933
GO:1903779	regulation of cardiac conduction	55	2	4.57645	0.0757167	0.166325
GO:0034333	adherens junction assembly	9	1	13.9836	0.0765644	0.166325
GO:0051901	positive regulation of mitochondrial depolarization	9	1	13.9836	0.0765644	0.166325
GO:0097267	omega-hydroxylase P450 pathway	9	1	13.9836	0.0765644	0.166325
GO:0006942	regulation of striated muscle contraction	9	1	13.9836	0.0765644	0.166325
GO:0021785	branchiomotor neuron axon guidance	9	1	13.9836	0.0765644	0.166325
GO:0018095	protein polyglutamylation	9	1	13.9836	0.0765644	0.166325
GO:0086012	membrane depolarization during cardiac muscle cell action potential	9	1	13.9836	0.0765644	0.166325
GO:0032099	negative regulation of appetite	9	1	13.9836	0.0765644	0.166325
GO:0048103	somatic stem cell division	9	1	13.9836	0.0765644	0.166325
GO:0030299	intestinal cholesterol absorption	9	1	13.9836	0.0765644	0.166325
GO:0060068	vagina development	9	1	13.9836	0.0765644	0.166325
GO:0055091	phospholipid homeostasis	9	1	13.9836	0.0765644	0.166325
GO:0047497	mitochondrion transport along microtubule	9	1	13.9836	0.0765644	0.166325
GO:2001214	positive regulation of vasculogenesis	9	1	13.9836	0.0765644	0.166325
GO:2000009	negative regulation of protein localization to cell surface	9	1	13.9836	0.0765644	0.166325
GO:0097104	postsynaptic membrane assembly	9	1	13.9836	0.0765644	0.166325
GO:0009635	response to herbicide	9	1	13.9836	0.0765644	0.166325
GO:0007184	SMAD protein import into nucleus	9	1	13.9836	0.0765644	0.166325
GO:0021680	cerebellar Purkinje cell layer development	9	1	13.9836	0.0765644	0.166325
GO:0007175	negative regulation of epidermal growth factor-activated receptor activity	9	1	13.9836	0.0765644	0.166325
GO:0090136	epithelial cell-cell adhesion	9	1	13.9836	0.0765644	0.166325
GO:0060044	negative regulation of cardiac muscle cell proliferation	9	1	13.9836	0.0765644	0.166325
GO:0086009	membrane repolarization	9	1	13.9836	0.0765644	0.166325
GO:0006930	substrate-dependent cell migration, cell extension	9	1	13.9836	0.0765644	0.166325
GO:0042698	ovulation cycle	9	1	13.9836	0.0765644	0.166325
GO:0060137	maternal process involved in parturition	9	1	13.9836	0.0765644	0.166325
GO:0060290	transdifferentiation	9	1	13.9836	0.0765644	0.166325
GO:0002244	hematopoietic progenitor cell differentiation	57	2	4.41587	0.0803396	0.172243
GO:0002230	positive regulation of defense response to virus by host	124	3	3.04481	0.0816287	0.174566
GO:0097191	extrinsic apoptotic signaling pathway	58	2	4.33974	0.0826829	0.176
GO:0008343	adult feeding behavior	10	1	12.5852	0.0838886	0.176
GO:0001921	positive regulation of receptor recycling	10	1	12.5852	0.0838886	0.176
GO:0035313	wound healing, spreading of epidermal cells	10	1	12.5852	0.0838886	0.176
GO:0036376	sodium ion export from cell	10	1	12.5852	0.0838886	0.176
GO:0010761	fibroblast migration	10	1	12.5852	0.0838886	0.176
GO:0042416	dopamine biosynthetic process	10	1	12.5852	0.0838886	0.176
GO:0050778	positive regulation of immune response	10	1	12.5852	0.0838886	0.176
GO:0010700	negative regulation of norepinephrine secretion	10	1	12.5852	0.0838886	0.176
GO:0042535	positive regulation of tumor necrosis factor biosynthetic process	10	1	12.5852	0.0838886	0.176
GO:0042359	vitamin D metabolic process	10	1	12.5852	0.0838886	0.176
GO:0032098	regulation of appetite	10	1	12.5852	0.0838886	0.176
GO:0070365	hepatocyte differentiation	10	1	12.5852	0.0838886	0.176
GO:0071383	cellular response to steroid hormone stimulus	10	1	12.5852	0.0838886	0.176
GO:0006897	endocytosis	126	3	2.99648	0.0846037	0.176828
GO:0034599	cellular response to oxidative stress	59	2	4.26618	0.0850469	0.176828
GO:0051289	protein homotetramerization	59	2	4.26618	0.0850469	0.176828
GO:0042632	cholesterol homeostasis	59	2	4.26618	0.0850469	0.176828
GO:0007586	digestion	60	2	4.19508	0.087431	0.181004
GO:0006006	glucose metabolic process	128	3	2.94966	0.0876239	0.181004
GO:0009653	anatomical structure morphogenesis	128	3	2.94966	0.0876239	0.181004
GO:0001523	retinoid metabolic process	61	2	4.12631	0.0898347	0.183679
GO:0006559	L-phenylalanine catabolic process	11	1	11.4411	0.0911543	0.183679
GO:0008347	glial cell migration	11	1	11.4411	0.0911543	0.183679
GO:0042738	exogenous drug catabolic process	11	1	11.4411	0.0911543	0.183679
GO:0034374	low-density lipoprotein particle remodeling	11	1	11.4411	0.0911543	0.183679
GO:0050777	negative regulation of immune response	11	1	11.4411	0.0911543	0.183679
GO:0046888	negative regulation of hormone secretion	11	1	11.4411	0.0911543	0.183679
GO:0055078	sodium ion homeostasis	11	1	11.4411	0.0911543	0.183679
GO:0003094	glomerular filtration	11	1	11.4411	0.0911543	0.183679
GO:0001946	lymphangiogenesis	11	1	11.4411	0.0911543	0.183679
GO:1900004	negative regulation of serine-type endopeptidase activity	11	1	11.4411	0.0911543	0.183679
GO:0097105	presynaptic membrane assembly	11	1	11.4411	0.0911543	0.183679
GO:0051024	positive regulation of immunoglobulin secretion	11	1	11.4411	0.0911543	0.183679
GO:0006937	regulation of muscle contraction	11	1	11.4411	0.0911543	0.183679
GO:0046325	negative regulation of glucose import	11	1	11.4411	0.0911543	0.183679
GO:0010955	negative regulation of protein processing	11	1	11.4411	0.0911543	0.183679
GO:0045779	negative regulation of bone resorption	11	1	11.4411	0.0911543	0.183679
GO:0042592	homeostatic process	11	1	11.4411	0.0911543	0.183679
GO:0021702	cerebellar Purkinje cell differentiation	11	1	11.4411	0.0911543	0.183679
GO:0045820	negative regulation of glycolytic process	11	1	11.4411	0.0911543	0.183679
GO:0033993	response to lipid	11	1	11.4411	0.0911543	0.183679
GO:0014068	positive regulation of phosphatidylinositol 3-kinase signaling	62	2	4.05975	0.0922576	0.185316
GO:0035413	positive regulation of catenin import into nucleus	12	1	10.4877	0.098362	0.19227
GO:0055119	relaxation of cardiac muscle	12	1	10.4877	0.098362	0.19227
GO:0055003	cardiac myofibril assembly	12	1	10.4877	0.098362	0.19227
GO:0045778	positive regulation of ossification	12	1	10.4877	0.098362	0.19227
GO:0009650	UV protection	12	1	10.4877	0.098362	0.19227
GO:0022409	positive regulation of cell-cell adhesion	12	1	10.4877	0.098362	0.19227
GO:0030007	cellular potassium ion homeostasis	12	1	10.4877	0.098362	0.19227
GO:0030277	maintenance of gastrointestinal epithelium	12	1	10.4877	0.098362	0.19227
GO:0042574	retinal metabolic process	12	1	10.4877	0.098362	0.19227
GO:0030517	negative regulation of axon extension	12	1	10.4877	0.098362	0.19227
GO:0055008	cardiac muscle tissue morphogenesis	12	1	10.4877	0.098362	0.19227
GO:0001678	cellular glucose homeostasis	12	1	10.4877	0.098362	0.19227
GO:0086004	regulation of cardiac muscle cell contraction	12	1	10.4877	0.098362	0.19227
GO:0006069	ethanol oxidation	12	1	10.4877	0.098362	0.19227
GO:0045019	negative regulation of nitric oxide biosynthetic process	12	1	10.4877	0.098362	0.19227
GO:0051272	positive regulation of cellular component movement	12	1	10.4877	0.098362	0.19227
GO:0030195	negative regulation of blood coagulation	12	1	10.4877	0.098362	0.19227
GO:0071318	cellular response to ATP	12	1	10.4877	0.098362	0.19227
GO:0046889	positive regulation of lipid biosynthetic process	12	1	10.4877	0.098362	0.19227
GO:0072488	ammonium transmembrane transport	12	1	10.4877	0.098362	0.19227
GO:1902287	semaphorin-plexin signaling pathway involved in axon guidance	12	1	10.4877	0.098362	0.19227
GO:0045667	regulation of osteoblast differentiation	12	1	10.4877	0.098362	0.19227
GO:0003376	sphingosine-1-phosphate signaling pathway	12	1	10.4877	0.098362	0.19227
GO:0032147	activation of protein kinase activity	65	2	3.87238	0.0996371	0.194464
GO:0045216	cell-cell junction organization	67	2	3.75679	0.104644	0.201303
GO:0071625	vocalization behavior	13	1	9.68095	0.105512	0.201303
GO:0006957	complement activation, alternative pathway	13	1	9.68095	0.105512	0.201303
GO:0010745	negative regulation of macrophage derived foam cell differentiation	13	1	9.68095	0.105512	0.201303
GO:0046685	response to arsenic-containing substance	13	1	9.68095	0.105512	0.201303
GO:0048747	muscle fiber development	13	1	9.68095	0.105512	0.201303
GO:0051145	smooth muscle cell differentiation	13	1	9.68095	0.105512	0.201303
GO:0060389	pathway-restricted SMAD protein phosphorylation	13	1	9.68095	0.105512	0.201303
GO:0071425	hematopoietic stem cell proliferation	13	1	9.68095	0.105512	0.201303
GO:0060038	cardiac muscle cell proliferation	13	1	9.68095	0.105512	0.201303
GO:0010667	negative regulation of cardiac muscle cell apoptotic process	13	1	9.68095	0.105512	0.201303
GO:0086064	cell communication by electrical coupling involved in cardiac conduction	13	1	9.68095	0.105512	0.201303
GO:0043268	positive regulation of potassium ion transport	13	1	9.68095	0.105512	0.201303
GO:0045995	regulation of embryonic development	13	1	9.68095	0.105512	0.201303
GO:0002087	regulation of respiratory gaseous exchange by neurological system process	13	1	9.68095	0.105512	0.201303
GO:0010248	establishment or maintenance of transmembrane electrochemical gradient	13	1	9.68095	0.105512	0.201303
GO:0033630	positive regulation of cell adhesion mediated by integrin	13	1	9.68095	0.105512	0.201303
GO:0060317	cardiac epithelial to mesenchymal transition	13	1	9.68095	0.105512	0.201303
GO:0043267	negative regulation of potassium ion transport	13	1	9.68095	0.105512	0.201303
GO:0007596	blood coagulation	490	7	1.79789	0.106789	0.202676
GO:0060347	heart trabecula formation	14	1	8.98945	0.112605	0.210577
GO:2000273	positive regulation of receptor activity	14	1	8.98945	0.112605	0.210577
GO:0060047	heart contraction	14	1	8.98945	0.112605	0.210577
GO:0048738	cardiac muscle tissue development	14	1	8.98945	0.112605	0.210577
GO:0043122	regulation of I-kappaB kinase/NF-kappaB signaling	14	1	8.98945	0.112605	0.210577
GO:0043149	stress fiber assembly	14	1	8.98945	0.112605	0.210577
GO:0035589	G-protein coupled purinergic nucleotide receptor signaling pathway	14	1	8.98945	0.112605	0.210577
GO:0033700	phospholipid efflux	14	1	8.98945	0.112605	0.210577
GO:1902176	negative regulation of oxidative stress-induced intrinsic apoptotic signaling pathway	14	1	8.98945	0.112605	0.210577
GO:0010875	positive regulation of cholesterol efflux	14	1	8.98945	0.112605	0.210577
GO:2001241	positive regulation of extrinsic apoptotic signaling pathway in absence of ligand	14	1	8.98945	0.112605	0.210577
GO:0035024	negative regulation of Rho protein signal transduction	14	1	8.98945	0.112605	0.210577
GO:2000147	positive regulation of cell motility	14	1	8.98945	0.112605	0.210577
GO:0042391	regulation of membrane potential	71	2	3.54514	0.114854	0.213977
GO:0042060	wound healing	71	2	3.54514	0.114854	0.213977
GO:0051966	regulation of synaptic transmission, glutamatergic	15	1	8.39016	0.119642	0.219071
GO:1901379	regulation of potassium ion transmembrane transport	15	1	8.39016	0.119642	0.219071
GO:0001953	negative regulation of cell-matrix adhesion	15	1	8.39016	0.119642	0.219071
GO:2000045	regulation of G1/S transition of mitotic cell cycle	15	1	8.39016	0.119642	0.219071
GO:0007213	G-protein coupled acetylcholine receptor signaling pathway	15	1	8.39016	0.119642	0.219071
GO:0010801	negative regulation of peptidyl-threonine phosphorylation	15	1	8.39016	0.119642	0.219071
GO:0050804	modulation of synaptic transmission	15	1	8.39016	0.119642	0.219071
GO:0043162	ubiquitin-dependent protein catabolic process via the multivesicular body sorting pathway	15	1	8.39016	0.119642	0.219071
GO:0048485	sympathetic nervous system development	15	1	8.39016	0.119642	0.219071
GO:0045109	intermediate filament organization	15	1	8.39016	0.119642	0.219071
GO:0030214	hyaluronan catabolic process	15	1	8.39016	0.119642	0.219071
GO:0034375	high-density lipoprotein particle remodeling	15	1	8.39016	0.119642	0.219071
GO:0045725	positive regulation of glycogen biosynthetic process	15	1	8.39016	0.119642	0.219071
GO:0036503	ERAD pathway	15	1	8.39016	0.119642	0.219071
GO:0042493	response to drug	320	5	1.96644	0.120536	0.219289
GO:0045666	positive regulation of neuron differentiation	75	2	3.35606	0.125301	0.227633
GO:0032874	positive regulation of stress-activated MAPK cascade	16	1	7.86577	0.126622	0.227759
GO:0048566	embryonic digestive tract development	16	1	7.86577	0.126622	0.227759
GO:0010832	negative regulation of myotube differentiation	16	1	7.86577	0.126622	0.227759
GO:0030970	retrograde protein transport, ER to cytosol	16	1	7.86577	0.126622	0.227759
GO:0007158	neuron cell-cell adhesion	16	1	7.86577	0.126622	0.227759
GO:2001234	negative regulation of apoptotic signaling pathway	16	1	7.86577	0.126622	0.227759
GO:0006750	glutathione biosynthetic process	16	1	7.86577	0.126622	0.227759
GO:0051497	negative regulation of stress fiber assembly	16	1	7.86577	0.126622	0.227759
GO:0042523	positive regulation of tyrosine phosphorylation of Stat5 protein	16	1	7.86577	0.126622	0.227759
GO:0030224	monocyte differentiation	16	1	7.86577	0.126622	0.227759
GO:0055093	response to hyperoxia	16	1	7.86577	0.126622	0.227759
GO:0008585	female gonad development	16	1	7.86577	0.126622	0.227759
GO:1900182	positive regulation of protein localization to nucleus	16	1	7.86577	0.126622	0.227759
GO:0034329	cell junction assembly	78	2	3.22698	0.133277	0.236375
GO:0007626	locomotory behavior	78	2	3.22698	0.133277	0.236375
GO:0006814	sodium ion transport	78	2	3.22698	0.133277	0.236375
GO:0030048	actin filament-based movement	17	1	7.40308	0.133547	0.236375
GO:0048663	neuron fate commitment	17	1	7.40308	0.133547	0.236375
GO:0075733	intracellular transport of virus	17	1	7.40308	0.133547	0.236375
GO:0001894	tissue homeostasis	17	1	7.40308	0.133547	0.236375
GO:0030500	regulation of bone mineralization	17	1	7.40308	0.133547	0.236375
GO:0050909	sensory perception of taste	17	1	7.40308	0.133547	0.236375
GO:0043691	reverse cholesterol transport	17	1	7.40308	0.133547	0.236375
GO:0071901	negative regulation of protein serine/threonine kinase activity	17	1	7.40308	0.133547	0.236375
GO:0070509	calcium ion import	17	1	7.40308	0.133547	0.236375
GO:0032869	cellular response to insulin stimulus	80	2	3.14631	0.138656	0.24272
GO:0001935	endothelial cell proliferation	18	1	6.9918	0.140416	0.243127
GO:0016079	synaptic vesicle exocytosis	18	1	6.9918	0.140416	0.243127
GO:1902236	negative regulation of endoplasmic reticulum stress-induced intrinsic apoptotic signaling pathway	18	1	6.9918	0.140416	0.243127
GO:0030225	macrophage differentiation	18	1	6.9918	0.140416	0.243127
GO:0043536	positive regulation of blood vessel endothelial cell migration	18	1	6.9918	0.140416	0.243127
GO:0002026	regulation of the force of heart contraction	18	1	6.9918	0.140416	0.243127
GO:0019373	epoxygenase P450 pathway	18	1	6.9918	0.140416	0.243127
GO:0006796	phosphate-containing compound metabolic process	18	1	6.9918	0.140416	0.243127
GO:0045445	myoblast differentiation	18	1	6.9918	0.140416	0.243127
GO:0036342	post-anal tail morphogenesis	18	1	6.9918	0.140416	0.243127
GO:0051897	positive regulation of protein kinase B signaling	81	2	3.10747	0.141363	0.244434
GO:1900087	positive regulation of G1/S transition of mitotic cell cycle	19	1	6.62381	0.147231	0.249998
GO:1903506	regulation of nucleic acid-templated transcription	19	1	6.62381	0.147231	0.249998
GO:0072583	clathrin-mediated endocytosis	19	1	6.62381	0.147231	0.249998
GO:0033189	response to vitamin A	19	1	6.62381	0.147231	0.249998
GO:0070987	error-free translesion synthesis	19	1	6.62381	0.147231	0.249998
GO:0006778	porphyrin-containing compound metabolic process	19	1	6.62381	0.147231	0.249998
GO:0002028	regulation of sodium ion transport	19	1	6.62381	0.147231	0.249998
GO:0010881	regulation of cardiac muscle contraction by regulation of the release of sequestered calcium ion	19	1	6.62381	0.147231	0.249998
GO:0006883	cellular sodium ion homeostasis	19	1	6.62381	0.147231	0.249998
GO:0032094	response to food	19	1	6.62381	0.147231	0.249998
GO:0050427	3'-phosphoadenosine 5'-phosphosulfate metabolic process	19	1	6.62381	0.147231	0.249998
GO:0090102	cochlea development	20	1	6.29262	0.153991	0.25678
GO:0045777	positive regulation of blood pressure	20	1	6.29262	0.153991	0.25678
GO:0031334	positive regulation of protein complex assembly	20	1	6.29262	0.153991	0.25678
GO:0043523	regulation of neuron apoptotic process	20	1	6.29262	0.153991	0.25678
GO:0019229	regulation of vasoconstriction	20	1	6.29262	0.153991	0.25678
GO:0032733	positive regulation of interleukin-10 production	20	1	6.29262	0.153991	0.25678
GO:0051894	positive regulation of focal adhesion assembly	20	1	6.29262	0.153991	0.25678
GO:1901216	positive regulation of neuron death	20	1	6.29262	0.153991	0.25678
GO:0050796	regulation of insulin secretion	86	2	2.9268	0.155056	0.25678
GO:0006767	water-soluble vitamin metabolic process	86	2	2.9268	0.155056	0.25678
GO:0006928	movement of cell or subcellular component	86	2	2.9268	0.155056	0.25678
GO:0008584	male gonad development	88	2	2.86028	0.160601	0.262201
GO:0001822	kidney development	88	2	2.86028	0.160601	0.262201
GO:0055007	cardiac muscle cell differentiation	21	1	5.99297	0.160697	0.262201
GO:0001502	cartilage condensation	21	1	5.99297	0.160697	0.262201
GO:0005980	glycogen catabolic process	21	1	5.99297	0.160697	0.262201
GO:0031016	pancreas development	21	1	5.99297	0.160697	0.262201
GO:0034113	heterotypic cell-cell adhesion	21	1	5.99297	0.160697	0.262201
GO:0035249	synaptic transmission, glutamatergic	21	1	5.99297	0.160697	0.262201
GO:0035902	response to immobilization stress	21	1	5.99297	0.160697	0.262201
GO:0007507	heart development	172	3	2.1951	0.163883	0.266886
GO:0032148	activation of protein kinase B activity	22	1	5.72056	0.16735	0.270628
GO:0048278	vesicle docking	22	1	5.72056	0.16735	0.270628
GO:0034394	protein localization to cell surface	22	1	5.72056	0.16735	0.270628
GO:0045736	negative regulation of cyclin-dependent protein serine/threonine kinase activity	22	1	5.72056	0.16735	0.270628
GO:0001816	cytokine production	22	1	5.72056	0.16735	0.270628
GO:0060173	limb development	22	1	5.72056	0.16735	0.270628
GO:0032496	response to lipopolysaccharide	176	3	2.14521	0.17158	0.276242
GO:0006954	inflammatory response	363	5	1.7335	0.172529	0.276894
GO:0007169	transmembrane receptor protein tyrosine kinase signaling pathway	93	2	2.7065	0.174611	0.279356
GO:0030182	neuron differentiation	94	2	2.67771	0.177436	0.283519
GO:0006469	negative regulation of protein kinase activity	95	2	2.64952	0.180268	0.286254
GO:0042572	retinol metabolic process	24	1	5.24385	0.180496	0.286254
GO:0030511	positive regulation of transforming growth factor beta receptor signaling pathway	24	1	5.24385	0.180496	0.286254
GO:0035924	cellular response to vascular endothelial growth factor stimulus	24	1	5.24385	0.180496	0.286254
GO:0033137	negative regulation of peptidyl-serine phosphorylation	24	1	5.24385	0.180496	0.286254
GO:0031214	biomineral tissue development	24	1	5.24385	0.180496	0.286254
GO:0048675	axon extension	24	1	5.24385	0.180496	0.286254
GO:0048477	oogenesis	24	1	5.24385	0.180496	0.286254
GO:0055114	oxidation-reduction process	574	7	1.53478	0.185425	0.292794
GO:0006979	response to oxidative stress	97	2	2.59489	0.185951	0.293261
GO:0061098	positive regulation of protein tyrosine kinase activity	25	1	5.03409	0.186991	0.293629
GO:0045930	negative regulation of mitotic cell cycle	25	1	5.03409	0.186991	0.293629
GO:0051017	actin filament bundle assembly	25	1	5.03409	0.186991	0.293629
GO:0005978	glycogen biosynthetic process	25	1	5.03409	0.186991	0.293629
GO:0001578	microtubule bundle formation	25	1	5.03409	0.186991	0.293629
GO:0000188	inactivation of MAPK activity	25	1	5.03409	0.186991	0.293629
GO:0071364	cellular response to epidermal growth factor stimulus	25	1	5.03409	0.186991	0.293629
GO:0007603	phototransduction, visible light	98	2	2.56842	0.188801	0.296107
GO:0007218	neuropeptide signaling pathway	99	2	2.54247	0.191658	0.299848
GO:0043488	regulation of mRNA stability	99	2	2.54247	0.191658	0.299848
GO:0030449	regulation of complement activation	26	1	4.84047	0.193434	0.301331
GO:0015721	bile acid and bile salt transport	26	1	4.84047	0.193434	0.301331
GO:0030212	hyaluronan metabolic process	26	1	4.84047	0.193434	0.301331
GO:0005977	glycogen metabolic process	26	1	4.84047	0.193434	0.301331
GO:0007159	leukocyte cell-cell adhesion	26	1	4.84047	0.193434	0.301331
GO:0031069	hair follicle morphogenesis	26	1	4.84047	0.193434	0.301331
GO:0040014	regulation of multicellular organism growth	26	1	4.84047	0.193434	0.301331
GO:0001764	neuron migration	101	2	2.49213	0.197387	0.30562
GO:0042593	glucose homeostasis	101	2	2.49213	0.197387	0.30562
GO:0006259	DNA metabolic process	27	1	4.6612	0.199825	0.306244
GO:0033344	cholesterol efflux	27	1	4.6612	0.199825	0.306244
GO:0032007	negative regulation of TOR signaling	27	1	4.6612	0.199825	0.306244
GO:0007528	neuromuscular junction development	27	1	4.6612	0.199825	0.306244
GO:0016358	dendrite development	27	1	4.6612	0.199825	0.306244
GO:0043388	positive regulation of DNA binding	27	1	4.6612	0.199825	0.306244
GO:0035329	hippo signaling	27	1	4.6612	0.199825	0.306244
GO:0060612	adipose tissue development	27	1	4.6612	0.199825	0.306244
GO:0045746	negative regulation of Notch signaling pathway	27	1	4.6612	0.199825	0.306244
GO:0051928	positive regulation of calcium ion transport	27	1	4.6612	0.199825	0.306244
GO:0035987	endodermal cell differentiation	27	1	4.6612	0.199825	0.306244
GO:0008285	negative regulation of cell proliferation	388	5	1.62181	0.206033	0.312191
GO:0010107	potassium ion import	28	1	4.49473	0.206166	0.312191
GO:0042476	odontogenesis	28	1	4.49473	0.206166	0.312191
GO:1900026	positive regulation of substrate adhesion-dependent cell spreading	28	1	4.49473	0.206166	0.312191
GO:0071479	cellular response to ionizing radiation	29	1	4.33974	0.212456	0.31906
GO:0045765	regulation of angiogenesis	29	1	4.33974	0.212456	0.31906
GO:0007032	endosome organization	29	1	4.33974	0.212456	0.31906
GO:0046627	negative regulation of insulin receptor signaling pathway	29	1	4.33974	0.212456	0.31906
GO:0021915	neural tube development	29	1	4.33974	0.212456	0.31906
GO:0051480	regulation of cytosolic calcium ion concentration	29	1	4.33974	0.212456	0.31906
GO:0048706	embryonic skeletal system development	29	1	4.33974	0.212456	0.31906
GO:0090004	positive regulation of establishment of protein localization to plasma membrane	29	1	4.33974	0.212456	0.31906
GO:0045787	positive regulation of cell cycle	29	1	4.33974	0.212456	0.31906
GO:0006641	triglyceride metabolic process	29	1	4.33974	0.212456	0.31906
GO:0002931	response to ischemia	29	1	4.33974	0.212456	0.31906
GO:0042787	protein ubiquitination involved in ubiquitin-dependent protein catabolic process	107	2	2.35238	0.214685	0.322027
GO:0009615	response to virus	108	2	2.3306	0.217581	0.325988
GO:0006730	one-carbon metabolic process	30	1	4.19508	0.218696	0.326314
GO:0048705	skeletal system morphogenesis	30	1	4.19508	0.218696	0.326314
GO:0032781	positive regulation of ATPase activity	30	1	4.19508	0.218696	0.326314
GO:0042771	intrinsic apoptotic signaling pathway in response to DNA damage by p53 class mediator	30	1	4.19508	0.218696	0.326314
GO:0043161	proteasome-mediated ubiquitin-dependent protein catabolic process	109	2	2.30922	0.220481	0.328208
GO:0007010	cytoskeleton organization	109	2	2.30922	0.220481	0.328208
GO:0044281	small molecule metabolic process	1706	17	1.2541	0.223927	0.329945
GO:0007259	JAK-STAT cascade	31	1	4.05975	0.224886	0.329945
GO:0051930	regulation of sensory perception of pain	31	1	4.05975	0.224886	0.329945
GO:0008016	regulation of heart contraction	31	1	4.05975	0.224886	0.329945
GO:0003007	heart morphogenesis	31	1	4.05975	0.224886	0.329945
GO:0007268	synaptic transmission	404	5	1.55758	0.228484	0.333113
GO:0070059	intrinsic apoptotic signaling pathway in response to endoplasmic reticulum stress	32	1	3.93289	0.231026	0.334522
GO:0071526	semaphorin-plexin signaling pathway	32	1	3.93289	0.231026	0.334522
GO:0015991	ATP hydrolysis coupled proton transport	32	1	3.93289	0.231026	0.334522
GO:0001974	blood vessel remodeling	32	1	3.93289	0.231026	0.334522
GO:0010634	positive regulation of epithelial cell migration	32	1	3.93289	0.231026	0.334522
GO:1901687	glutathione derivative biosynthetic process	32	1	3.93289	0.231026	0.334522
GO:0007166	cell surface receptor signaling pathway	305	4	1.65052	0.232723	0.336214
GO:0002027	regulation of heart rate	33	1	3.81371	0.237118	0.342175
GO:0042517	positive regulation of tyrosine phosphorylation of Stat3 protein	33	1	3.81371	0.237118	0.342175
GO:0007271	synaptic transmission, cholinergic	34	1	3.70154	0.243161	0.349707
GO:0017144	drug metabolic process	34	1	3.70154	0.243161	0.349707
GO:0001837	epithelial to mesenchymal transition	34	1	3.70154	0.243161	0.349707
GO:0006865	amino acid transport	34	1	3.70154	0.243161	0.349707
GO:0032355	response to estradiol	117	2	2.15132	0.243766	0.350182
GO:0051209	release of sequestered calcium ion into cytosol	35	1	3.59578	0.249156	0.356117
GO:0042059	negative regulation of epidermal growth factor receptor signaling pathway	35	1	3.59578	0.249156	0.356117
GO:0006606	protein import into nucleus	35	1	3.59578	0.249156	0.356117
GO:0048666	neuron development	35	1	3.59578	0.249156	0.356117
GO:0007188	adenylate cyclase-modulating G-protein coupled receptor signaling pathway	35	1	3.59578	0.249156	0.356117
GO:0032720	negative regulation of tumor necrosis factor production	35	1	3.59578	0.249156	0.356117
GO:0009409	response to cold	35	1	3.59578	0.249156	0.356117
GO:0001525	angiogenesis	217	3	1.73989	0.255054	0.362663
GO:0006446	regulation of translational initiation	36	1	3.4959	0.255103	0.362663
GO:0007631	feeding behavior	36	1	3.4959	0.255103	0.362663
GO:0050714	positive regulation of protein secretion	36	1	3.4959	0.255103	0.362663
GO:0010977	negative regulation of neuron projection development	36	1	3.4959	0.255103	0.362663
GO:0070534	protein K63-linked ubiquitination	36	1	3.4959	0.255103	0.362663
GO:0010629	negative regulation of gene expression	121	2	2.0802	0.255445	0.362663
GO:0070588	calcium ion transmembrane transport	121	2	2.0802	0.255445	0.362663
GO:0030308	negative regulation of cell growth	122	2	2.06315	0.258366	0.365994
GO:0030036	actin cytoskeleton organization	122	2	2.06315	0.258366	0.365994
GO:0010811	positive regulation of cell-substrate adhesion	37	1	3.40141	0.261003	0.368289
GO:0007588	excretion	37	1	3.40141	0.261003	0.368289
GO:0019882	antigen processing and presentation	37	1	3.40141	0.261003	0.368289
GO:0007204	positive regulation of cytosolic calcium ion concentration	123	2	2.04638	0.261287	0.368289
GO:0042157	lipoprotein metabolic process	38	1	3.3119	0.266855	0.373425
GO:0034446	substrate adhesion-dependent cell spreading	38	1	3.3119	0.266855	0.373425
GO:0002062	chondrocyte differentiation	38	1	3.3119	0.266855	0.373425
GO:0090002	establishment of protein localization to plasma membrane	38	1	3.3119	0.266855	0.373425
GO:0032024	positive regulation of insulin secretion	38	1	3.3119	0.266855	0.373425
GO:0009790	embryo development	38	1	3.3119	0.266855	0.373425
GO:0048839	inner ear development	38	1	3.3119	0.266855	0.373425
GO:0006909	phagocytosis	38	1	3.3119	0.266855	0.373425
GO:0050821	protein stabilization	126	2	1.99766	0.270051	0.377094
GO:0070527	platelet aggregation	39	1	3.22698	0.272662	0.378045
GO:1901215	negative regulation of neuron death	39	1	3.22698	0.272662	0.378045
GO:0045071	negative regulation of viral genome replication	39	1	3.22698	0.272662	0.378045
GO:0046854	phosphatidylinositol phosphorylation	39	1	3.22698	0.272662	0.378045
GO:0006833	water transport	39	1	3.22698	0.272662	0.378045
GO:0008219	cell death	39	1	3.22698	0.272662	0.378045
GO:0003151	outflow tract morphogenesis	39	1	3.22698	0.272662	0.378045
GO:0060348	bone development	39	1	3.22698	0.272662	0.378045
GO:0015701	bicarbonate transport	39	1	3.22698	0.272662	0.378045
GO:0045184	establishment of protein localization	39	1	3.22698	0.272662	0.378045
GO:0034332	adherens junction organization	39	1	3.22698	0.272662	0.378045
GO:0030514	negative regulation of BMP signaling pathway	40	1	3.14631	0.278421	0.383111
GO:0045599	negative regulation of fat cell differentiation	40	1	3.14631	0.278421	0.383111
GO:0035094	response to nicotine	40	1	3.14631	0.278421	0.383111
GO:0008333	endosome to lysosome transport	40	1	3.14631	0.278421	0.383111
GO:0008206	bile acid metabolic process	40	1	3.14631	0.278421	0.383111
GO:0030155	regulation of cell adhesion	41	1	3.06957	0.284135	0.389501
GO:0021549	cerebellum development	41	1	3.06957	0.284135	0.389501
GO:0001895	retina homeostasis	41	1	3.06957	0.284135	0.389501
GO:0051092	positive regulation of NF-kappaB transcription factor activity	131	2	1.92141	0.284644	0.389779
GO:0090263	positive regulation of canonical Wnt signaling pathway	132	2	1.90685	0.28756	0.392926
GO:0051496	positive regulation of stress fiber assembly	42	1	2.99648	0.289803	0.395356
GO:0001658	branching involved in ureteric bud morphogenesis	42	1	2.99648	0.289803	0.395356
GO:0043010	camera-type eye development	42	1	2.99648	0.289803	0.395356
GO:0007179	transforming growth factor beta receptor signaling pathway	133	2	1.89252	0.290473	0.395846
GO:0045786	negative regulation of cell cycle	43	1	2.9268	0.295426	0.401093
GO:0048468	cell development	43	1	2.9268	0.295426	0.401093
GO:0035872	nucleotide-binding domain, leucine rich repeat containing receptor signaling pathway	43	1	2.9268	0.295426	0.401093
GO:0019731	antibacterial humoral response	43	1	2.9268	0.295426	0.401093
GO:0043434	response to peptide hormone	43	1	2.9268	0.295426	0.401093
GO:0008015	blood circulation	43	1	2.9268	0.295426	0.401093
GO:0034220	ion transmembrane transport	237	3	1.59307	0.297579	0.403371
GO:0043525	positive regulation of neuron apoptotic process	44	1	2.86028	0.301005	0.406931
GO:0030178	negative regulation of Wnt signaling pathway	44	1	2.86028	0.301005	0.406931
GO:0010595	positive regulation of endothelial cell migration	44	1	2.86028	0.301005	0.406931
GO:0032956	regulation of actin cytoskeleton organization	44	1	2.86028	0.301005	0.406931
GO:0043408	regulation of MAPK cascade	45	1	2.79672	0.306539	0.41266
GO:0008542	visual learning	45	1	2.79672	0.306539	0.41266
GO:0035176	social behavior	46	1	2.73592	0.312028	0.415081
GO:0007187	G-protein coupled receptor signaling pathway, coupled to cyclic nucleotide second messenger	46	1	2.73592	0.312028	0.415081
GO:0010506	regulation of autophagy	46	1	2.73592	0.312028	0.415081
GO:0002250	adaptive immune response	141	2	1.78514	0.313709	0.415081
GO:0006094	gluconeogenesis	47	1	2.67771	0.317474	0.417023
GO:0009267	cellular response to starvation	47	1	2.67771	0.317474	0.417023
GO:0070936	protein K48-linked ubiquitination	47	1	2.67771	0.317474	0.417023
GO:0032526	response to retinoic acid	47	1	2.67771	0.317474	0.417023
GO:0007519	skeletal muscle tissue development	47	1	2.67771	0.317474	0.417023
GO:0071277	cellular response to calcium ion	48	1	2.62192	0.322877	0.421741
GO:0001541	ovarian follicle development	48	1	2.62192	0.322877	0.421741
GO:0071363	cellular response to growth factor stimulus	48	1	2.62192	0.322877	0.421741
GO:0023014	signal transduction by protein phosphorylation	48	1	2.62192	0.322877	0.421741
GO:0051865	protein autoubiquitination	48	1	2.62192	0.322877	0.421741
GO:0010862	positive regulation of pathway-restricted SMAD protein phosphorylation	48	1	2.62192	0.322877	0.421741
GO:0019048	modulation by virus of host morphology or physiology	48	1	2.62192	0.322877	0.421741
GO:0035914	skeletal muscle cell differentiation	48	1	2.62192	0.322877	0.421741
GO:0019985	translesion synthesis	48	1	2.62192	0.322877	0.421741
GO:0000209	protein polyubiquitination	146	2	1.724	0.328143	0.426757
GO:0000910	cytokinesis	49	1	2.56842	0.328236	0.426757
GO:0008344	adult locomotory behavior	49	1	2.56842	0.328236	0.426757
GO:0006357	regulation of transcription from RNA polymerase II promoter	361	4	1.39449	0.329736	0.427833
GO:0042542	response to hydrogen peroxide	51	1	2.46769	0.338828	0.438068
GO:0045727	positive regulation of translation	51	1	2.46769	0.338828	0.438068
GO:0040008	regulation of growth	52	1	2.42024	0.34406	0.443034
GO:0006091	generation of precursor metabolites and energy	52	1	2.42024	0.34406	0.443034
GO:0090502	RNA phosphodiester bond hydrolysis, endonucleolytic	52	1	2.42024	0.34406	0.443034
GO:0042472	inner ear morphogenesis	52	1	2.42024	0.34406	0.443034
GO:0001570	vasculogenesis	52	1	2.42024	0.34406	0.443034
GO:0006898	receptor-mediated endocytosis	153	2	1.64513	0.348198	0.447906
GO:0006631	fatty acid metabolic process	53	1	2.37457	0.349251	0.447906
GO:0007200	phospholipase C-activating G-protein coupled receptor signaling pathway	53	1	2.37457	0.349251	0.447906
GO:0032091	negative regulation of protein binding	53	1	2.37457	0.349251	0.447906
GO:0007608	sensory perception of smell	154	2	1.63445	0.351046	0.449756
GO:0034097	response to cytokine	54	1	2.3306	0.3544	0.453597
GO:0043087	regulation of GTPase activity	54	1	2.3306	0.3544	0.453597
GO:0007612	learning	55	1	2.28822	0.359509	0.458982
GO:0008202	steroid metabolic process	55	1	2.28822	0.359509	0.458982
GO:0050680	negative regulation of epithelial cell proliferation	55	1	2.28822	0.359509	0.458982
GO:0009967	positive regulation of signal transduction	55	1	2.28822	0.359509	0.458982
GO:0032092	positive regulation of protein binding	56	1	2.24736	0.364576	0.460669
GO:0016049	cell growth	56	1	2.24736	0.364576	0.460669
GO:0019369	arachidonic acid metabolic process	56	1	2.24736	0.364576	0.460669
GO:0007266	Rho protein signal transduction	56	1	2.24736	0.364576	0.460669
GO:0017148	negative regulation of translation	56	1	2.24736	0.364576	0.460669
GO:0072659	protein localization to plasma membrane	56	1	2.24736	0.364576	0.460669
GO:0060395	SMAD protein signal transduction	56	1	2.24736	0.364576	0.460669
GO:0030433	ER-associated ubiquitin-dependent protein catabolic process	57	1	2.20794	0.369604	0.460669
GO:0032922	circadian regulation of gene expression	57	1	2.20794	0.369604	0.460669
GO:0006661	phosphatidylinositol biosynthetic process	57	1	2.20794	0.369604	0.460669
GO:0035556	intracellular signal transduction	386	4	1.30417	0.373899	0.460669
GO:0016266	O-glycan processing	58	1	2.16987	0.374591	0.460669
GO:0071407	cellular response to organic cyclic compound	58	1	2.16987	0.374591	0.460669
GO:0051592	response to calcium ion	58	1	2.16987	0.374591	0.460669
GO:0009612	response to mechanical stimulus	58	1	2.16987	0.374591	0.460669
GO:0019233	sensory perception of pain	58	1	2.16987	0.374591	0.460669
GO:0007416	synapse assembly	59	1	2.13309	0.379539	0.460669
GO:0070301	cellular response to hydrogen peroxide	59	1	2.13309	0.379539	0.460669
GO:1902600	hydrogen ion transmembrane transport	59	1	2.13309	0.379539	0.460669
GO:0051965	positive regulation of synapse assembly	60	1	2.09754	0.384447	0.46451
GO:0045732	positive regulation of protein catabolic process	60	1	2.09754	0.384447	0.46451
GO:0007568	aging	167	2	1.50721	0.38763	0.467468
GO:0006886	intracellular protein transport	167	2	1.50721	0.38763	0.467468
GO:0006958	complement activation, classical pathway	61	1	2.06315	0.389316	0.469058
GO:0016197	endosomal transport	62	1	2.02988	0.394146	0.474204
GO:0032436	positive regulation of proteasomal ubiquitin-dependent protein catabolic process	62	1	2.02988	0.394146	0.474204
GO:0016477	cell migration	170	2	1.48062	0.395941	0.475914
GO:0008203	cholesterol metabolic process	63	1	1.99766	0.398938	0.478613
GO:0043627	response to estrogen	63	1	1.99766	0.398938	0.478613
GO:0006486	protein glycosylation	63	1	1.99766	0.398938	0.478613
GO:0015758	glucose transport	64	1	1.96644	0.403692	0.48386
GO:0051260	protein homooligomerization	173	2	1.45494	0.404199	0.484013
GO:0055085	transmembrane transport	643	6	1.17436	0.410053	0.488635
GO:0006457	protein folding	176	2	1.43014	0.412401	0.489918
GO:0000723	telomere maintenance	66	1	1.90685	0.413086	0.490504
GO:0043065	positive regulation of apoptotic process	296	3	1.27553	0.422792	0.500396
GO:0050729	positive regulation of inflammatory response	69	1	1.82395	0.426899	0.504085
GO:0045444	fat cell differentiation	69	1	1.82395	0.426899	0.504085
GO:0009749	response to glucose	69	1	1.82395	0.426899	0.504085
GO:0070098	chemokine-mediated signaling pathway	69	1	1.82395	0.426899	0.504085
GO:0006869	lipid transport	70	1	1.79789	0.43143	0.509199
GO:0009791	post-embryonic development	71	1	1.77257	0.435925	0.514266
GO:0030512	negative regulation of transforming growth factor beta receptor signaling pathway	72	1	1.74795	0.440384	0.518806
GO:0043086	negative regulation of catalytic activity	73	1	1.724	0.444808	0.523292
GO:0007420	brain development	189	2	1.33177	0.447249	0.525678
GO:0006816	calcium ion transport	74	1	1.70071	0.449197	0.527724
GO:0035725	sodium ion transmembrane transport	75	1	1.67803	0.453551	0.532347
GO:0001503	ossification	75	1	1.67803	0.453551	0.532347
GO:0035264	multicellular organism growth	76	1	1.65595	0.45787	0.535935
GO:0060021	palate development	76	1	1.65595	0.45787	0.535935
GO:0030216	keratinocyte differentiation	76	1	1.65595	0.45787	0.535935
GO:0016042	lipid catabolic process	77	1	1.63445	0.462154	0.540702
GO:0006813	potassium ion transport	79	1	1.59307	0.470622	0.54985
GO:0007601	visual perception	199	2	1.26485	0.473232	0.552393
GO:0006919	activation of cysteine-type endopeptidase activity involved in apoptotic process	80	1	1.57315	0.474805	0.553469
GO:0030307	positive regulation of cell growth	80	1	1.57315	0.474805	0.553469
GO:0071260	cellular response to mechanical stimulus	80	1	1.57315	0.474805	0.553469
GO:0006493	protein O-linked glycosylation	83	1	1.51629	0.487156	0.567087
GO:0001889	liver development	87	1	1.44658	0.503171	0.584661
GO:0090305	nucleic acid phosphodiester bond hydrolysis	88	1	1.43014	0.507095	0.585481
GO:0030336	negative regulation of cell migration	89	1	1.41407	0.510989	0.588909
GO:0007409	axonogenesis	89	1	1.41407	0.510989	0.588909
GO:0010976	positive regulation of neuron projection development	91	1	1.38299	0.518682	0.596965
GO:0006915	apoptotic process	599	5	1.05052	0.520811	0.598063
GO:0005975	carbohydrate metabolic process	346	3	1.09121	0.522311	0.598977
GO:0007565	female pregnancy	94	1	1.33885	0.529995	0.607242
GO:0043066	negative regulation of apoptotic process	482	4	1.04442	0.536558	0.613105
GO:0031175	neuron projection development	96	1	1.31096	0.537388	0.613504
GO:0016192	vesicle-mediated transport	96	1	1.31096	0.537388	0.613504
GO:0000186	activation of MAPKK activity	230	2	1.09437	0.548761	0.625366
GO:0035335	peptidyl-tyrosine dephosphorylation	100	1	1.25852	0.551824	0.627174
GO:0045893	positive regulation of transcription, DNA-templated	495	4	1.01699	0.556957	0.631866
GO:0006112	energy reserve metabolic process	102	1	1.23385	0.558872	0.631866
GO:0045087	innate immune response	885	7	0.995442	0.55893	0.631866
GO:0030968	endoplasmic reticulum unfolded protein response	103	1	1.22187	0.562353	0.635454
GO:0042981	regulation of apoptotic process	239	2	1.05316	0.569193	0.642374
GO:0001649	osteoblast differentiation	107	1	1.17619	0.576006	0.649441
GO:0000165	MAPK cascade	245	2	1.02737	0.582432	0.654217
GO:0008150	biological_process	645	5	0.9756	0.584288	0.654217
GO:0007265	Ras protein signal transduction	246	2	1.02319	0.584609	0.654217
GO:0071805	potassium ion transmembrane transport	110	1	1.14411	0.585963	0.655445
GO:0007417	central nervous system development	114	1	1.10397	0.598874	0.669299
GO:0050900	leukocyte migration	116	1	1.08493	0.605177	0.676046
GO:0030203	glycosaminoglycan metabolic process	118	1	1.06655	0.61138	0.681481
GO:0071456	cellular response to hypoxia	119	1	1.05758	0.614444	0.684598
GO:0022617	extracellular matrix disassembly	120	1	1.04877	0.617485	0.687684
GO:0006629	lipid metabolic process	121	1	1.0401	0.620501	0.690741
GO:0002223	stimulatory C-type lectin receptor signaling pathway	123	1	1.02319	0.626462	0.697072
GO:0007399	nervous system development	269	2	0.935705	0.63232	0.70267
GO:0006470	protein dephosphorylation	126	1	0.998828	0.635227	0.705592
GO:0043524	negative regulation of neuron apoptotic process	129	1	0.9756	0.643785	0.712249
GO:0001934	positive regulation of protein phosphorylation	132	1	0.953427	0.65214	0.712249
GO:0048010	vascular endothelial growth factor receptor signaling pathway	281	2	0.895746	0.655439	0.714947
GO:0051056	regulation of small GTPase mediated signal transduction	134	1	0.939197	0.657601	0.715204
GO:0050911	detection of chemical stimulus involved in sensory perception of smell	425	3	0.88837	0.65764	0.715204
GO:0050776	regulation of immune response	136	1	0.925385	0.662976	0.719201
GO:0000122	negative regulation of transcription from RNA polymerase II promoter	708	5	0.888788	0.663009	0.719201
GO:0006508	proteolysis	432	3	0.873975	0.668167	0.723871
GO:0006810	transport	296	2	0.850354	0.682663	0.738006
GO:0007050	cell cycle arrest	144	1	0.873975	0.683637	0.738746
GO:0033209	tumor necrosis factor-mediated signaling pathway	146	1	0.862002	0.688601	0.743163
GO:0008286	insulin receptor signaling pathway	301	2	0.836228	0.691333	0.74548
GO:0030154	cell differentiation	449	3	0.840884	0.692723	0.746031
GO:0006302	double-strand break repair	151	1	0.833459	0.700668	0.753633
GO:0043123	positive regulation of I-kappaB kinase/NF-kappaB signaling	154	1	0.817223	0.707682	0.760855
GO:0016055	Wnt signaling pathway	158	1	0.796534	0.716776	0.769983
GO:0051607	defense response to virus	158	1	0.796534	0.716776	0.769983
GO:0007173	epidermal growth factor receptor signaling pathway	322	2	0.781692	0.725603	0.777825
GO:0042127	regulation of cell proliferation	163	1	0.7721	0.727745	0.779793
GO:0006888	ER to Golgi vesicle-mediated transport	165	1	0.762742	0.732012	0.783687
GO:0045892	negative regulation of transcription, DNA-templated	479	3	0.788219	0.732611	0.783687
GO:0070374	positive regulation of ERK1 and ERK2 cascade	171	1	0.735979	0.744413	0.795978
GO:0006644	phospholipid metabolic process	173	1	0.72747	0.748417	0.799588
GO:0044255	cellular lipid metabolic process	175	1	0.719156	0.752358	0.803125
GO:0030335	positive regulation of cell migration	176	1	0.71507	0.754305	0.804866
GO:0007049	cell cycle	187	1	0.673007	0.774733	0.82528
GO:0006974	cellular response to DNA damage stimulus	195	1	0.645397	0.788507	0.837152
GO:0007283	spermatogenesis	371	2	0.678449	0.793055	0.840579
GO:0006281	DNA repair	380	2	0.662381	0.803704	0.850804
GO:0006366	transcription from RNA polymerase II promoter	551	3	0.685222	0.81143	0.857913
GO:0048011	neurotrophin TRK receptor signaling pathway	395	2	0.637227	0.82036	0.865917
GO:0006325	chromatin organization	237	1	0.531023	0.848078	0.893323
GO:0007067	mitotic nuclear division	240	1	0.524385	0.851622	0.896685
GO:0018279	protein N-linked glycosylation via asparagine	247	1	0.509524	0.85957	0.90468
GO:0006367	transcription initiation from RNA polymerase II promoter	251	1	0.501404	0.863918	0.908881
GO:0043547	positive regulation of GTPase activity	483	2	0.521128	0.89465	0.938112
GO:0019221	cytokine-mediated signaling pathway	289	1	0.435475	0.899034	0.941933
GO:0008543	fibroblast growth factor receptor signaling pathway	292	1	0.431001	0.901383	0.944006
GO:0007264	small GTPase mediated signal transduction	706	3	0.534783	0.916106	0.955887
GO:0038095	Fc-epsilon receptor signaling pathway	315	1	0.399531	0.917656	0.956721
GO:0034641	cellular nitrogen compound metabolic process	324	1	0.388433	0.923262	0.960953
GO:0051301	cell division	325	1	0.387238	0.92386	0.960953
GO:0016032	viral process	550	2	0.457645	0.930686	0.964426
GO:0045944	positive regulation of transcription from RNA polymerase II promoter	943	4	0.533838	0.937799	0.96821
GO:0016567	protein ubiquitination	364	1	0.345748	0.943883	0.974097
GO:0015031	protein transport	388	1	0.324362	0.953476	0.980986
GO:0008152	metabolic process	421	1	0.298937	0.964034	0.984126
GO:0006468	protein phosphorylation	446	1	0.28218	0.970397	0.990224
GO:0007275	multicellular organism development	450	1	0.279672	0.971304	0.990753
GO:0043687	post-translational protein modification	460	1	0.273592	0.973452	0.992508
GO:0010467	gene expression	958	3	0.39411	0.979892	0.996322
GO:0006351	transcription, DNA-templated	1812	6	0.41673	0.994604	0.998226
GO:0006355	regulation of transcription, DNA-templated	1300	3	0.290428	0.997443	0.998226
GO:0044267	cellular protein metabolic process	883	1	0.142528	0.998975	0.998975

## Sheet: Up_GO_Gene
GO_ID	GO_Name	Gene_symbol	Gene_synonyms	Description	enrichment	p_value	FDR
GO:0007155	cell adhesion	PGM5	PGMRP	phosphoglucomutase 5	4.54888	4.07677e-06	0.000604653
GO:0007155	cell adhesion	NEDD9	CAS-L|CAS2|CASL|CASS2|HEF1	neural precursor cell expressed, developmentally down-regulated 9	4.54888	4.07677e-06	0.000604653
GO:0007155	cell adhesion	DPT	TRAMP	dermatopontin	4.54888	4.07677e-06	0.000604653
GO:0007155	cell adhesion	MFAP4	-	microfibrillar associated protein 4	4.54888	4.07677e-06	0.000604653
GO:0007155	cell adhesion	RHOB	ARH6|ARHB|MST081|MSTP081|RHOH6	ras homolog family member B	4.54888	4.07677e-06	0.000604653
GO:0007155	cell adhesion	MSLN	MPF|SMRP	mesothelin	4.54888	4.07677e-06	0.000604653
GO:0007155	cell adhesion	ACTN2	CMD1AA|CMH23	actinin alpha 2	4.54888	4.07677e-06	0.000604653
GO:0007155	cell adhesion	PCDHB4	PCDH-BETA4	protocadherin beta 4	4.54888	4.07677e-06	0.000604653
GO:0007155	cell adhesion	TNXB	EDS3|HXBL|TENX|TN-X|TNX|TNXB1|TNXB2|TNXBS|VUR8|XB|XBS	tenascin XB	4.54888	4.07677e-06	0.000604653
GO:0007155	cell adhesion	CDH8	Nbla04261	cadherin 8	4.54888	4.07677e-06	0.000604653
GO:0007155	cell adhesion	ITGA9	ALPHA-RLC|ITGA4L|RLC	integrin subunit alpha 9	4.54888	4.07677e-06	0.000604653
GO:0007155	cell adhesion	LAMA2	LAMM	laminin subunit alpha 2	4.54888	4.07677e-06	0.000604653
GO:0007155	cell adhesion	MUC16	CA125	mucin 16, cell surface associated	4.54888	4.07677e-06	0.000604653
GO:0007155	cell adhesion	WISP2	CCN5|CT58|CTGF-L	WNT1 inducible signaling pathway protein 2	4.54888	4.07677e-06	0.000604653
GO:0007155	cell adhesion	AOC3	HPAO|SSAO|VAP-1|VAP1	amine oxidase, copper containing 3	4.54888	4.07677e-06	0.000604653
GO:0007160	cell-matrix adhesion	MSLN	MPF|SMRP	mesothelin	9.68095	1.62743e-05	0.000727204
GO:0007160	cell-matrix adhesion	SORBS1	CAP|FLAF2|R85FL|SH3D5|SH3P12|SORB1	sorbin and SH3 domain containing 1	9.68095	1.62743e-05	0.000727204
GO:0007160	cell-matrix adhesion	FBLN5	ADCL2|ARCL1A|ARMD3|DANCE|EVEC|FIBL-5|HNARMD|UP50	fibulin 5	9.68095	1.62743e-05	0.000727204
GO:0007160	cell-matrix adhesion	TNXB	EDS3|HXBL|TENX|TN-X|TNX|TNXB1|TNXB2|TNXBS|VUR8|XB|XBS	tenascin XB	9.68095	1.62743e-05	0.000727204
GO:0007160	cell-matrix adhesion	LYVE1	CRSBP-1|HAR|LYVE-1|XLKD1	lymphatic vessel endothelial hyaluronan receptor 1	9.68095	1.62743e-05	0.000727204
GO:0007160	cell-matrix adhesion	ITGA7	-	integrin subunit alpha 7	9.68095	1.62743e-05	0.000727204
GO:0007160	cell-matrix adhesion	CD34	-	CD34 molecule	9.68095	1.62743e-05	0.000727204
GO:0048251	elastic fiber assembly	FBLN5	ADCL2|ARCL1A|ARMD3|DANCE|EVEC|FIBL-5|HNARMD|UP50	fibulin 5	53.9367	5.86161e-05	0.00167747
GO:0048251	elastic fiber assembly	TNXB	EDS3|HXBL|TENX|TN-X|TNX|TNXB1|TNXB2|TNXBS|VUR8|XB|XBS	tenascin XB	53.9367	5.86161e-05	0.00167747
GO:0048251	elastic fiber assembly	MFAP4	-	microfibrillar associated protein 4	53.9367	5.86161e-05	0.00167747
GO:0090084	negative regulation of inclusion body assembly	HSPA1B	HSP70-1B|HSP70-2|HSP70.2	heat shock protein family A (Hsp70) member 1B	41.9508	0.000106167	0.0029392
GO:0090084	negative regulation of inclusion body assembly	DNAJB1	HSPF1|Hdj1|Hsp40|RSPH16B|Sis1	DnaJ heat shock protein family (Hsp40) member B1	41.9508	0.000106167	0.0029392
GO:0090084	negative regulation of inclusion body assembly	HSPA1A	HEL-S-103|HSP70-1|HSP70-1A|HSP70.1|HSP70I|HSP72|HSPA1	heat shock protein family A (Hsp70) member 1A	41.9508	0.000106167	0.0029392
GO:0046034	ATP metabolic process	HSPA1B	HSP70-1B|HSP70-2|HSP70.2	heat shock protein family A (Hsp70) member 1B	17.3589	0.000139766	0.00367098
GO:0046034	ATP metabolic process	HSPA1A	HEL-S-103|HSP70-1|HSP70-1A|HSP70.1|HSP70I|HSP72|HSPA1	heat shock protein family A (Hsp70) member 1A	17.3589	0.000139766	0.00367098
GO:0046034	ATP metabolic process	ATP1A2	FHM2|MHP2	ATPase Na+/K+ transporting subunit alpha 2	17.3589	0.000139766	0.00367098
GO:0046034	ATP metabolic process	VCP	ALS14|CMT2Y|HEL-220|HEL-S-70|IBMPFD|IBMPFD1|TERA|p97	valosin containing protein	17.3589	0.000139766	0.00367098
GO:0006986	response to unfolded protein	CHAC1	-	ChaC glutathione-specific gamma-glutamylcyclotransferase 1	11.9859	0.00051245	0.00815757
GO:0006986	response to unfolded protein	HSPB1	CMT2F|HEL-S-102|HMN2B|HS.76067|HSP27|HSP28|Hsp25|SRP27	heat shock protein family B (small) member 1	11.9859	0.00051245	0.00815757
GO:0006986	response to unfolded protein	DNAJB5	Hsc40	DnaJ heat shock protein family (Hsp40) member B5	11.9859	0.00051245	0.00815757
GO:0006986	response to unfolded protein	DNAJB1	HSPF1|Hdj1|Hsp40|RSPH16B|Sis1	DnaJ heat shock protein family (Hsp40) member B1	11.9859	0.00051245	0.00815757
GO:0009624	response to nematode	ITLN1	HL-1|HL1|INTL|ITLN|LFR|hIntL|omentin	intelectin 1	83.9016	0.000623781	0.00945696
GO:0070434	positive regulation of nucleotide-binding oligomerization domain containing 2 signaling pathway	HSPA1A	HEL-S-103|HSP70-1|HSP70-1A|HSP70.1|HSP70I|HSP72|HSPA1	heat shock protein family A (Hsp70) member 1A	83.9016	0.000623781	0.00945696
GO:0070434	positive regulation of nucleotide-binding oligomerization domain containing 2 signaling pathway	HSPA1B	HSP70-1B|HSP70-2|HSP70.2	heat shock protein family A (Hsp70) member 1B	83.9016	0.000623781	0.00945696
GO:0009624	response to nematode	CYP1A1	AHH|AHRR|CP11|CYP1|CYPIA1|P1-450|P450-C|P450DX	cytochrome P450 family 1 subfamily A member 1	83.9016	0.000623781	0.00945696
GO:0070370	cellular heat acclimation	HSPA1B	HSP70-1B|HSP70-2|HSP70.2	heat shock protein family A (Hsp70) member 1B	62.9262	0.000930666	0.012676
GO:0071395	cellular response to jasmonic acid stimulus	AKR1C2	AKR1C-pseudo|BABP|DD|DD-2|DD/BABP|DD2|DDH2|HAKRD|HBAB|MCDR2|SRXY8|TDD	aldo-keto reductase family 1, member C2	62.9262	0.000930666	0.012676
GO:0070370	cellular heat acclimation	HSPA1A	HEL-S-103|HSP70-1|HSP70-1A|HSP70.1|HSP70I|HSP72|HSPA1	heat shock protein family A (Hsp70) member 1A	62.9262	0.000930666	0.012676
GO:0071395	cellular response to jasmonic acid stimulus	AKR1C1	2-ALPHA-HSD|20-ALPHA-HSD|C9|DD1|DD1/DD2|DDH|DDH1|H-37|HAKRC|HBAB|MBAB	aldo-keto reductase family 1, member C1	62.9262	0.000930666	0.012676
GO:0030198	extracellular matrix organization	ITGA9	ALPHA-RLC|ITGA4L|RLC	integrin subunit alpha 9	3.68948	0.00123886	0.0160989
GO:0030198	extracellular matrix organization	MFAP4	-	microfibrillar associated protein 4	3.68948	0.00123886	0.0160989
GO:0030198	extracellular matrix organization	FBLN5	ADCL2|ARCL1A|ARMD3|DANCE|EVEC|FIBL-5|HNARMD|UP50	fibulin 5	3.68948	0.00123886	0.0160989
GO:0030198	extracellular matrix organization	TGFB2	LDS4|TGF-beta2	transforming growth factor beta 2	3.68948	0.00123886	0.0160989
GO:0030198	extracellular matrix organization	TPSAB1	TPS1|TPS2|TPSB1	tryptase alpha/beta 1	3.68948	0.00123886	0.0160989
GO:0030198	extracellular matrix organization	LAMA2	LAMM	laminin subunit alpha 2	3.68948	0.00123886	0.0160989
GO:0030198	extracellular matrix organization	C6orf15	STG	chromosome 6 open reading frame 15	3.68948	0.00123886	0.0160989
GO:0030198	extracellular matrix organization	VIT	-	vitrin	3.68948	0.00123886	0.0160989
GO:0030198	extracellular matrix organization	ITGA7	-	integrin subunit alpha 7	3.68948	0.00123886	0.0160989
GO:0060157	urinary bladder development	RBP4	MCOPCB10|RDCCAS	retinol binding protein 4	50.3409	0.00129597	0.0165042
GO:0090131	mesenchyme migration	ACTG2	ACT|ACTA3|ACTE|ACTL3|ACTSG|VSCM	actin, gamma 2, smooth muscle, enteric	50.3409	0.00129597	0.0165042
GO:0060157	urinary bladder development	MYOCD	MYCD	myocardin	50.3409	0.00129597	0.0165042
GO:0090131	mesenchyme migration	ACTC1	ACTC|ASD5|CMD1R|CMH11|LVNC4	actin, alpha, cardiac muscle 1	50.3409	0.00129597	0.0165042
GO:0016337	single organismal cell-cell adhesion	NTN1	NTN1L	netrin 1	6.62381	0.00132913	0.0165136
GO:0016337	single organismal cell-cell adhesion	TNXB	EDS3|HXBL|TENX|TN-X|TNX|TNXB1|TNXB2|TNXBS|VUR8|XB|XBS	tenascin XB	6.62381	0.00132913	0.0165136
GO:0016337	single organismal cell-cell adhesion	PDPN	AGGRUS|GP36|GP40|Gp38|HT1A-1|OTS8|PA2.26|T1A|T1A-2|T1A2|TI1A	podoplanin	6.62381	0.00132913	0.0165136
GO:0016337	single organismal cell-cell adhesion	PIP5K1C	LCCS3|PIP5K-GAMMA|PIP5K1-gamma|PIP5Kgamma	phosphatidylinositol-4-phosphate 5-kinase, type I, gamma	6.62381	0.00132913	0.0165136
GO:0016337	single organismal cell-cell adhesion	CD34	-	CD34 molecule	6.62381	0.00132913	0.0165136
GO:1903265	positive regulation of tumor necrosis factor-mediated signaling pathway	HSPA1B	HSP70-1B|HSP70-2|HSP70.2	heat shock protein family A (Hsp70) member 1B	41.9508	0.00171873	0.0173692
GO:1903265	positive regulation of tumor necrosis factor-mediated signaling pathway	HSPA1A	HEL-S-103|HSP70-1|HSP70-1A|HSP70.1|HSP70I|HSP72|HSPA1	heat shock protein family A (Hsp70) member 1A	41.9508	0.00171873	0.0173692
GO:0045773	positive regulation of axon extension	MAP1B	FUTSCH|MAP5|PPP1R102	microtubule associated protein 1B	13.4842	0.00193405	0.0173692
GO:0045773	positive regulation of axon extension	NTN1	NTN1L	netrin 1	13.4842	0.00193405	0.0173692
GO:0001654	eye development	TGFB2	LDS4|TGF-beta2	transforming growth factor beta 2	13.4842	0.00193405	0.0173692
GO:0001654	eye development	SMOC1	OAS	SPARC related modular calcium binding 1	13.4842	0.00193405	0.0173692
GO:0045773	positive regulation of axon extension	TNFRSF12A	CD266|FN14|TWEAKR	tumor necrosis factor receptor superfamily member 12A	13.4842	0.00193405	0.0173692
GO:0001654	eye development	RBP4	MCOPCB10|RDCCAS	retinol binding protein 4	13.4842	0.00193405	0.0173692
GO:0034605	cellular response to heat	DNAJB1	HSPF1|Hdj1|Hsp40|RSPH16B|Sis1	DnaJ heat shock protein family (Hsp40) member B1	5.99297	0.00202104	0.0174778
GO:0034605	cellular response to heat	HSPA1A	HEL-S-103|HSP70-1|HSP70-1A|HSP70.1|HSP70I|HSP72|HSPA1	heat shock protein family A (Hsp70) member 1A	5.99297	0.00202104	0.0174778
GO:0034605	cellular response to heat	VCP	ALS14|CMT2Y|HEL-220|HEL-S-70|IBMPFD|IBMPFD1|TERA|p97	valosin containing protein	5.99297	0.00202104	0.0174778
GO:0034605	cellular response to heat	BAG2	BAG-2|dJ417I1.2	BCL2 associated athanogene 2	5.99297	0.00202104	0.0174778
GO:0034605	cellular response to heat	HSPA1B	HSP70-1B|HSP70-2|HSP70.2	heat shock protein family A (Hsp70) member 1B	5.99297	0.00202104	0.0174778
GO:0044597	daunorubicin metabolic process	AKR1C1	2-ALPHA-HSD|20-ALPHA-HSD|C9|DD1|DD1/DD2|DDH|DDH1|H-37|HAKRC|HBAB|MBAB	aldo-keto reductase family 1, member C1	31.4631	0.00273284	0.0211653
GO:0044597	daunorubicin metabolic process	AKR1C2	AKR1C-pseudo|BABP|DD|DD-2|DD/BABP|DD2|DDH2|HAKRD|HBAB|MCDR2|SRXY8|TDD	aldo-keto reductase family 1, member C2	31.4631	0.00273284	0.0211653
GO:0042448	progesterone metabolic process	AKR1C2	AKR1C-pseudo|BABP|DD|DD-2|DD/BABP|DD2|DDH2|HAKRD|HBAB|MCDR2|SRXY8|TDD	aldo-keto reductase family 1, member C2	31.4631	0.00273284	0.0211653
GO:0009308	amine metabolic process	CYP1A1	AHH|AHRR|CP11|CYP1|CYPIA1|P1-450|P450-C|P450DX	cytochrome P450 family 1 subfamily A member 1	31.4631	0.00273284	0.0211653
GO:0044598	doxorubicin metabolic process	AKR1C1	2-ALPHA-HSD|20-ALPHA-HSD|C9|DD1|DD1/DD2|DDH|DDH1|H-37|HAKRC|HBAB|MBAB	aldo-keto reductase family 1, member C1	31.4631	0.00273284	0.0211653
GO:0044598	doxorubicin metabolic process	AKR1C2	AKR1C-pseudo|BABP|DD|DD-2|DD/BABP|DD2|DDH2|HAKRD|HBAB|MCDR2|SRXY8|TDD	aldo-keto reductase family 1, member C2	31.4631	0.00273284	0.0211653
GO:0009308	amine metabolic process	AOC3	HPAO|SSAO|VAP-1|VAP1	amine oxidase, copper containing 3	31.4631	0.00273284	0.0211653
GO:0042448	progesterone metabolic process	AKR1C1	2-ALPHA-HSD|20-ALPHA-HSD|C9|DD1|DD1/DD2|DDH|DDH1|H-37|HAKRC|HBAB|MBAB	aldo-keto reductase family 1, member C1	31.4631	0.00273284	0.0211653
GO:0030334	regulation of cell migration	RHOB	ARH6|ARHB|MST081|MSTP081|RHOH6	ras homolog family member B	7.40308	0.00273396	0.0211653
GO:0030334	regulation of cell migration	PLXNA4	FAYV2820|PLEXA4|PLXNA4A|PLXNA4B|PRO34003	plexin A4	7.40308	0.00273396	0.0211653
GO:0030334	regulation of cell migration	NTN1	NTN1L	netrin 1	7.40308	0.00273396	0.0211653
GO:0030334	regulation of cell migration	LAMA2	LAMM	laminin subunit alpha 2	7.40308	0.00273396	0.0211653
GO:0010033	response to organic substance	TIMP4	-	TIMP metallopeptidase inhibitor 4	11.4411	0.00298124	0.0228712
GO:0010033	response to organic substance	ABCG1	ABC8|WHITE1	ATP binding cassette subfamily G member 1	11.4411	0.00298124	0.0228712
GO:0010033	response to organic substance	CHRM4	HM4|M4R	cholinergic receptor muscarinic 4	11.4411	0.00298124	0.0228712
GO:0045907	positive regulation of vasoconstriction	NPY1R	NPY1-R|NPYR	neuropeptide Y receptor Y1	11.1046	0.0032249	0.0244771
GO:0045907	positive regulation of vasoconstriction	ADRA2C	ADRA2L2|ADRA2RL2|ADRARL2|ALPHA2CAR	adrenoceptor alpha 2C	11.1046	0.0032249	0.0244771
GO:0045907	positive regulation of vasoconstriction	ADRA1D	ADRA1|ADRA1A|ADRA1R|ALPHA1|DAR|dJ779E11.2	adrenoceptor alpha 1D	11.1046	0.0032249	0.0244771
GO:0001666	response to hypoxia	DDIT4	Dig2|REDD-1|REDD1	DNA damage inducible transcript 4	4.41587	0.00327707	0.0244771
GO:0001666	response to hypoxia	MYOCD	MYCD	myocardin	4.41587	0.00327707	0.0244771
GO:0001666	response to hypoxia	PDLIM1	CLIM1|CLP-36|CLP36|HEL-S-112|hCLIM1	PDZ and LIM domain 1	4.41587	0.00327707	0.0244771
GO:0001666	response to hypoxia	CYP1A1	AHH|AHRR|CP11|CYP1|CYPIA1|P1-450|P450-C|P450DX	cytochrome P450 family 1 subfamily A member 1	4.41587	0.00327707	0.0244771
GO:0001666	response to hypoxia	SCNN1B	BESC1|ENaCb|ENaCbeta|SCNEB	sodium channel epithelial 1 beta subunit	4.41587	0.00327707	0.0244771
GO:0001666	response to hypoxia	TGFB2	LDS4|TGF-beta2	transforming growth factor beta 2	4.41587	0.00327707	0.0244771
GO:1900034	regulation of cellular response to heat	DNAJB1	HSPF1|Hdj1|Hsp40|RSPH16B|Sis1	DnaJ heat shock protein family (Hsp40) member B1	6.71213	0.0038183	0.0280265
GO:1900034	regulation of cellular response to heat	BAG2	BAG-2|dJ417I1.2	BCL2 associated athanogene 2	6.71213	0.0038183	0.0280265
GO:1900034	regulation of cellular response to heat	HSPA1B	HSP70-1B|HSP70-2|HSP70.2	heat shock protein family A (Hsp70) member 1B	6.71213	0.0038183	0.0280265
GO:1900034	regulation of cellular response to heat	HSPA1A	HEL-S-103|HSP70-1|HSP70-1A|HSP70.1|HSP70I|HSP72|HSPA1	heat shock protein family A (Hsp70) member 1A	6.71213	0.0038183	0.0280265
GO:0006805	xenobiotic metabolic process	CHAC1	-	ChaC glutathione-specific gamma-glutamylcyclotransferase 1	4.24221	0.00395543	0.0282922
GO:0006805	xenobiotic metabolic process	AKR1C1	2-ALPHA-HSD|20-ALPHA-HSD|C9|DD1|DD1/DD2|DDH|DDH1|H-37|HAKRC|HBAB|MBAB	aldo-keto reductase family 1, member C1	4.24221	0.00395543	0.0282922
GO:0006805	xenobiotic metabolic process	CYP4B1	CYPIVB1|P-450HP	cytochrome P450 family 4 subfamily B member 1	4.24221	0.00395543	0.0282922
GO:0006805	xenobiotic metabolic process	CYP1A1	AHH|AHRR|CP11|CYP1|CYPIA1|P1-450|P450-C|P450DX	cytochrome P450 family 1 subfamily A member 1	4.24221	0.00395543	0.0282922
GO:0006805	xenobiotic metabolic process	ALDH1B1	ALDH5|ALDHX	aldehyde dehydrogenase 1 family member B1	4.24221	0.00395543	0.0282922
GO:0006805	xenobiotic metabolic process	AOC3	HPAO|SSAO|VAP-1|VAP1	amine oxidase, copper containing 3	4.24221	0.00395543	0.0282922
GO:0010941	regulation of cell death	HSPA1A	HEL-S-103|HSP70-1|HSP70-1A|HSP70.1|HSP70I|HSP72|HSPA1	heat shock protein family A (Hsp70) member 1A	25.1705	0.00396558	0.0282922
GO:0031953	negative regulation of protein autophosphorylation	GFRA2	GDNFRB|NRTNR-ALPHA|NTNRA|RETL2|TRNR2	GDNF family receptor alpha 2	25.1705	0.00396558	0.0282922
GO:0010941	regulation of cell death	HSPA1B	HSP70-1B|HSP70-2|HSP70.2	heat shock protein family A (Hsp70) member 1B	25.1705	0.00396558	0.0282922
GO:0031953	negative regulation of protein autophosphorylation	ENPP1	ARHR2|COLED|M6S1|NPP1|NPPS|PC-1|PCA1|PDNP1	ectonucleotide pyrophosphatase/phosphodiesterase 1	25.1705	0.00396558	0.0282922
GO:0030049	muscle filament sliding	ACTC1	ACTC|ASD5|CMD1R|CMH11|LVNC4	actin, alpha, cardiac muscle 1	9.93571	0.00431965	0.030279
GO:0030199	collagen fibril organization	TGFB2	LDS4|TGF-beta2	transforming growth factor beta 2	9.93571	0.00431965	0.030279
GO:0030199	collagen fibril organization	DPT	TRAMP	dermatopontin	9.93571	0.00431965	0.030279
GO:0030049	muscle filament sliding	DES	CSM1|CSM2|LGMD2R	desmin	9.93571	0.00431965	0.030279
GO:0030049	muscle filament sliding	ACTN2	CMD1AA|CMH23	actinin alpha 2	9.93571	0.00431965	0.030279
GO:0030199	collagen fibril organization	TNXB	EDS3|HXBL|TENX|TN-X|TNX|TNXB1|TNXB2|TNXBS|VUR8|XB|XBS	tenascin XB	9.93571	0.00431965	0.030279
GO:0006693	prostaglandin metabolic process	PDPN	AGGRUS|GP36|GP40|Gp38|HT1A-1|OTS8|PA2.26|T1A|T1A-2|T1A2|TI1A	podoplanin	22.8822	0.00466165	0.0318317
GO:0051481	negative regulation of cytosolic calcium ion concentration	NPY1R	NPY1-R|NPYR	neuropeptide Y receptor Y1	22.8822	0.00466165	0.0318317
GO:0006693	prostaglandin metabolic process	AKR1C2	AKR1C-pseudo|BABP|DD|DD-2|DD/BABP|DD2|DDH2|HAKRD|HBAB|MCDR2|SRXY8|TDD	aldo-keto reductase family 1, member C2	22.8822	0.00466165	0.0318317
GO:0051481	negative regulation of cytosolic calcium ion concentration	ATP1A2	FHM2|MHP2	ATPase Na+/K+ transporting subunit alpha 2	22.8822	0.00466165	0.0318317
GO:0048565	digestive tract development	CYP1A1	AHH|AHRR|CP11|CYP1|CYPIA1|P1-450|P450-C|P450DX	cytochrome P450 family 1 subfamily A member 1	9.43893	0.00494136	0.0331956
GO:0048565	digestive tract development	DCHS1	CDH19|CDH25|CDHR6|FIB1|MVP2|PCDH16|VMLDS1	dachsous cadherin-related 1	9.43893	0.00494136	0.0331956
GO:0048565	digestive tract development	MYOCD	MYCD	myocardin	9.43893	0.00494136	0.0331956
GO:0022011	myelination in peripheral nervous system	LAMA2	LAMM	laminin subunit alpha 2	19.3619	0.00620875	0.0404442
GO:0043206	extracellular fibril organization	MFAP4	-	microfibrillar associated protein 4	19.3619	0.00620875	0.0404442
GO:0060065	uterus development	MYOCD	MYCD	myocardin	19.3619	0.00620875	0.0404442
GO:0022011	myelination in peripheral nervous system	MYOC	GLC1A|GPOA|JOAG|JOAG1|TIGR	myocilin	19.3619	0.00620875	0.0404442
GO:0060065	uterus development	RBP4	MCOPCB10|RDCCAS	retinol binding protein 4	19.3619	0.00620875	0.0404442
GO:0043206	extracellular fibril organization	TNXB	EDS3|HXBL|TENX|TN-X|TNX|TNXB1|TNXB2|TNXBS|VUR8|XB|XBS	tenascin XB	19.3619	0.00620875	0.0404442
GO:0019079	viral genome replication	VCP	ALS14|CMT2Y|HEL-220|HEL-S-70|IBMPFD|IBMPFD1|TERA|p97	valosin containing protein	17.9789	0.00705803	0.0444971
GO:0019079	viral genome replication	CD209	CDSIGN|CLEC4L|DC-SIGN|DC-SIGN1	CD209 molecule	17.9789	0.00705803	0.0444971
GO:0006940	regulation of smooth muscle contraction	CNN1	HEL-S-14|SMCC|Sm-Calp	calponin 1	17.9789	0.00705803	0.0444971
GO:0006940	regulation of smooth muscle contraction	ATP1A2	FHM2|MHP2	ATPase Na+/K+ transporting subunit alpha 2	17.9789	0.00705803	0.0444971
GO:0031396	regulation of protein ubiquitination	HSPA1A	HEL-S-103|HSP70-1|HSP70-1A|HSP70.1|HSP70I|HSP72|HSPA1	heat shock protein family A (Hsp70) member 1A	16.7803	0.00795666	0.0487154
GO:0015695	organic cation transport	SLC22A3	EMT|EMTH|OCT3	solute carrier family 22 member 3	16.7803	0.00795666	0.0487154
GO:0042026	protein refolding	HSPA1A	HEL-S-103|HSP70-1|HSP70-1A|HSP70.1|HSP70I|HSP72|HSPA1	heat shock protein family A (Hsp70) member 1A	16.7803	0.00795666	0.0487154
GO:0042026	protein refolding	HSPA1B	HSP70-1B|HSP70-2|HSP70.2	heat shock protein family A (Hsp70) member 1B	16.7803	0.00795666	0.0487154
GO:0015695	organic cation transport	SLC47A1	MATE1	solute carrier family 47 member 1	16.7803	0.00795666	0.0487154
GO:0031396	regulation of protein ubiquitination	HSPA1B	HSP70-1B|HSP70-2|HSP70.2	heat shock protein family A (Hsp70) member 1B	16.7803	0.00795666	0.0487154
GO:0061337	cardiac conduction	ATP1A2	FHM2|MHP2	ATPase Na+/K+ transporting subunit alpha 2	5.29905	0.00842469	0.0510898
GO:0061337	cardiac conduction	RYR3	RYR-3	ryanodine receptor 3	5.29905	0.00842469	0.0510898
GO:0061337	cardiac conduction	KCNIP3	CSEN|DREAM|KCHIP3	potassium voltage-gated channel interacting protein 3	5.29905	0.00842469	0.0510898
GO:0061337	cardiac conduction	CACNB2	CACNLB2|CAVB2|MYSB	calcium voltage-gated channel auxiliary subunit beta 2	5.29905	0.00842469	0.0510898
GO:0060548	negative regulation of cell death	WISP2	CCN5|CT58|CTGF-L	WNT1 inducible signaling pathway protein 2	7.40308	0.00930113	0.0557411
GO:0060548	negative regulation of cell death	HSPA1B	HSP70-1B|HSP70-2|HSP70.2	heat shock protein family A (Hsp70) member 1B	7.40308	0.00930113	0.0557411
GO:0060548	negative regulation of cell death	HSPA1A	HEL-S-103|HSP70-1|HSP70-1A|HSP70.1|HSP70I|HSP72|HSPA1	heat shock protein family A (Hsp70) member 1A	7.40308	0.00930113	0.0557411
GO:0030168	platelet activation	PDPN	AGGRUS|GP36|GP40|Gp38|HT1A-1|OTS8|PA2.26|T1A|T1A-2|T1A2|TI1A	podoplanin	3.47979	0.00975505	0.0569865
GO:0030168	platelet activation	TGFB2	LDS4|TGF-beta2	transforming growth factor beta 2	3.47979	0.00975505	0.0569865
GO:0030168	platelet activation	ACTN2	CMD1AA|CMH23	actinin alpha 2	3.47979	0.00975505	0.0569865
GO:0030168	platelet activation	CFD	ADIPSIN|ADN|DF|PFD	complement factor D (adipsin)	3.47979	0.00975505	0.0569865
GO:0030168	platelet activation	RHOB	ARH6|ARHB|MST081|MSTP081|RHOH6	ras homolog family member B	3.47979	0.00975505	0.0569865
GO:0030168	platelet activation	ADRA2C	ADRA2L2|ADRA2RL2|ADRARL2|ALPHA2CAR	adrenoceptor alpha 2C	3.47979	0.00975505	0.0569865
GO:0006855	drug transmembrane transport	SLC47A1	MATE1	solute carrier family 47 member 1	14.8062	0.00989854	0.0574529
GO:0006855	drug transmembrane transport	SLC22A3	EMT|EMTH|OCT3	solute carrier family 22 member 3	14.8062	0.00989854	0.0574529
GO:0031032	actomyosin structure organization	CNN1	HEL-S-14|SMCC|Sm-Calp	calponin 1	13.9836	0.0109401	0.0617839
GO:0031032	actomyosin structure organization	ACTC1	ACTC|ASD5|CMD1R|CMH11|LVNC4	actin, alpha, cardiac muscle 1	13.9836	0.0109401	0.0617839
GO:0071880	adenylate cyclase-activating adrenergic receptor signaling pathway	ADRA1D	ADRA1|ADRA1A|ADRA1R|ALPHA1|DAR|dJ779E11.2	adrenoceptor alpha 1D	13.2476	0.0120278	0.0667359
GO:0071880	adenylate cyclase-activating adrenergic receptor signaling pathway	ADRA2C	ADRA2L2|ADRA2RL2|ADRARL2|ALPHA2CAR	adrenoceptor alpha 2C	13.2476	0.0120278	0.0667359
GO:0006936	muscle contraction	DES	CSM1|CSM2|LGMD2R	desmin	4.74915	0.0120528	0.0667359
GO:0006936	muscle contraction	MYOM1	SKELEMIN	myomesin 1	4.74915	0.0120528	0.0667359
GO:0006936	muscle contraction	SORBS1	CAP|FLAF2|R85FL|SH3D5|SH3P12|SORB1	sorbin and SH3 domain containing 1	4.74915	0.0120528	0.0667359
GO:0006936	muscle contraction	ACTG2	ACT|ACTA3|ACTE|ACTL3|ACTSG|VSCM	actin, gamma 2, smooth muscle, enteric	4.74915	0.0120528	0.0667359
GO:0010628	positive regulation of gene expression	CD34	-	CD34 molecule	3.29744	0.0123622	0.0675678
GO:0010628	positive regulation of gene expression	HSPA1A	HEL-S-103|HSP70-1|HSP70-1A|HSP70.1|HSP70I|HSP72|HSPA1	heat shock protein family A (Hsp70) member 1A	3.29744	0.0123622	0.0675678
GO:0010628	positive regulation of gene expression	ACTC1	ACTC|ASD5|CMD1R|CMH11|LVNC4	actin, alpha, cardiac muscle 1	3.29744	0.0123622	0.0675678
GO:0010628	positive regulation of gene expression	HSPA1B	HSP70-1B|HSP70-2|HSP70.2	heat shock protein family A (Hsp70) member 1B	3.29744	0.0123622	0.0675678
GO:0010628	positive regulation of gene expression	ACTG2	ACT|ACTA3|ACTE|ACTL3|ACTSG|VSCM	actin, gamma 2, smooth muscle, enteric	3.29744	0.0123622	0.0675678
GO:0010628	positive regulation of gene expression	TGFB2	LDS4|TGF-beta2	transforming growth factor beta 2	3.29744	0.0123622	0.0675678
GO:0008284	positive regulation of cell proliferation	BAMBI	NMA	BMP and activin membrane-bound inhibitor	2.52828	0.0128792	0.0689844
GO:0008284	positive regulation of cell proliferation	MYOCD	MYCD	myocardin	2.52828	0.0128792	0.0689844
GO:0008284	positive regulation of cell proliferation	TGFB2	LDS4|TGF-beta2	transforming growth factor beta 2	2.52828	0.0128792	0.0689844
GO:0008284	positive regulation of cell proliferation	IL31RA	CRL|CRL3|GLM-R|GLMR|GPL|IL-31RA|PLCA2|PRO21384|hGLM-R	interleukin 31 receptor A	2.52828	0.0128792	0.0689844
GO:0008284	positive regulation of cell proliferation	ADRA1D	ADRA1|ADRA1A|ADRA1R|ALPHA1|DAR|dJ779E11.2	adrenoceptor alpha 1D	2.52828	0.0128792	0.0689844
GO:0008284	positive regulation of cell proliferation	NTN1	NTN1L	netrin 1	2.52828	0.0128792	0.0689844
GO:0008284	positive regulation of cell proliferation	AKR1C2	AKR1C-pseudo|BABP|DD|DD-2|DD/BABP|DD2|DDH2|HAKRD|HBAB|MCDR2|SRXY8|TDD	aldo-keto reductase family 1, member C2	2.52828	0.0128792	0.0689844
GO:0008284	positive regulation of cell proliferation	S1PR3	EDG-3|EDG3|LPB3|S1P3	sphingosine-1-phosphate receptor 3	2.52828	0.0128792	0.0689844
GO:0008284	positive regulation of cell proliferation	GAREM1	C18orf11|FAM59A|GAREM|Gm944	GRB2 associated regulator of MAPK1 subtype 1	2.52828	0.0128792	0.0689844
GO:0006952	defense response	ACKR1	CCBP1|CD234|DARC|Dfy|FY|GPD|GpFy|WBCQ1	atypical chemokine receptor 1 (Duffy blood group)	6.5096	0.0129464	0.0689844
GO:0006952	defense response	TPSAB1	TPS1|TPS2|TPSB1	tryptase alpha/beta 1	6.5096	0.0129464	0.0689844
GO:0006952	defense response	IL31RA	CRL|CRL3|GLM-R|GLMR|GPL|IL-31RA|PLCA2|PRO21384|hGLM-R	interleukin 31 receptor A	6.5096	0.0129464	0.0689844
GO:0030325	adrenal gland development	FSTL3	FLRG|FSRP	follistatin like 3	12.5852	0.0131606	0.0694137
GO:0030325	adrenal gland development	ARID5B	DESRT|MRF-2|MRF2	AT-rich interaction domain 5B	12.5852	0.0131606	0.0694137
GO:0045671	negative regulation of osteoclast differentiation	FSTL3	FLRG|FSRP	follistatin like 3	11.9859	0.0143378	0.0740126
GO:0048870	cell motility	PDPN	AGGRUS|GP36|GP40|Gp38|HT1A-1|OTS8|PA2.26|T1A|T1A-2|T1A2|TI1A	podoplanin	11.9859	0.0143378	0.0740126
GO:0048870	cell motility	CD34	-	CD34 molecule	11.9859	0.0143378	0.0740126
GO:0045671	negative regulation of osteoclast differentiation	CARTPT	CART	CART prepropeptide	11.9859	0.0143378	0.0740126
GO:0009611	response to wounding	CYP1A1	AHH|AHRR|CP11|CYP1|CYPIA1|P1-450|P450-C|P450DX	cytochrome P450 family 1 subfamily A member 1	6.18946	0.0147236	0.0740126
GO:0009611	response to wounding	LYVE1	CRSBP-1|HAR|LYVE-1|XLKD1	lymphatic vessel endothelial hyaluronan receptor 1	6.18946	0.0147236	0.0740126
GO:0009611	response to wounding	TGFB2	LDS4|TGF-beta2	transforming growth factor beta 2	6.18946	0.0147236	0.0740126
GO:0045987	positive regulation of smooth muscle contraction	MYOCD	MYCD	myocardin	11.4411	0.0155587	0.0740126
GO:0045987	positive regulation of smooth muscle contraction	ADRA1D	ADRA1|ADRA1A|ADRA1R|ALPHA1|DAR|dJ779E11.2	adrenoceptor alpha 1D	11.4411	0.0155587	0.0740126
GO:0051615	histamine uptake	SLC22A3	EMT|EMTH|OCT3	solute carrier family 22 member 3	125.852	0.0158079	0.0740126
GO:0070237	positive regulation of activation-induced cell death of T cells	TGFB2	LDS4|TGF-beta2	transforming growth factor beta 2	125.852	0.0158079	0.0740126
GO:0009720	detection of hormone stimulus	ABCG1	ABC8|WHITE1	ATP binding cassette subfamily G member 1	125.852	0.0158079	0.0740126
GO:1902380	positive regulation of endoribonuclease activity	HSPA1A	HEL-S-103|HSP70-1|HSP70-1A|HSP70.1|HSP70I|HSP72|HSPA1	heat shock protein family A (Hsp70) member 1A	125.852	0.0158079	0.0740126
GO:0090101	negative regulation of transmembrane receptor protein serine/threonine kinase signaling pathway	FSTL3	FLRG|FSRP	follistatin like 3	125.852	0.0158079	0.0740126
GO:0033275	actin-myosin filament sliding	ACTC1	ACTC|ASD5|CMD1R|CMH11|LVNC4	actin, alpha, cardiac muscle 1	125.852	0.0158079	0.0740126
GO:0051695	actin filament uncapping	ACTN2	CMD1AA|CMH23	actinin alpha 2	125.852	0.0158079	0.0740126
GO:0038133	ERBB2-ERBB3 signaling pathway	MYOC	GLC1A|GPOA|JOAG|JOAG1|TIGR	myocilin	125.852	0.0158079	0.0740126
GO:0032812	positive regulation of epinephrine secretion	CARTPT	CART	CART prepropeptide	125.852	0.0158079	0.0740126
GO:0042637	catagen	TGFB2	LDS4|TGF-beta2	transforming growth factor beta 2	125.852	0.0158079	0.0740126
GO:0071971	extracellular exosome assembly	CD34	-	CD34 molecule	125.852	0.0158079	0.0740126
GO:0072389	flavin adenine dinucleotide catabolic process	VCP	ALS14|CMT2Y|HEL-220|HEL-S-70|IBMPFD|IBMPFD1|TERA|p97	valosin containing protein	125.852	0.0158079	0.0740126
GO:0019341	dibenzo-p-dioxin catabolic process	CYP1A1	AHH|AHRR|CP11|CYP1|CYPIA1|P1-450|P450-C|P450DX	cytochrome P450 family 1 subfamily A member 1	125.852	0.0158079	0.0740126
GO:0045209	MAPK phosphatase export from nucleus, leptomycin B sensitive	DUSP16	MKP-7|MKP7	dual specificity phosphatase 16	125.852	0.0158079	0.0740126
GO:1900239	regulation of phenotypic switching	MYOCD	MYCD	myocardin	125.852	0.0158079	0.0740126
GO:0018917	fluorene metabolic process	CYP4B1	CYPIVB1|P-450HP	cytochrome P450 family 4 subfamily B member 1	125.852	0.0158079	0.0740126
GO:1903007	positive regulation of Lys63-specific deubiquitinase activity	VCP	ALS14|CMT2Y|HEL-220|HEL-S-70|IBMPFD|IBMPFD1|TERA|p97	valosin containing protein	125.852	0.0158079	0.0740126
GO:0010712	regulation of collagen metabolic process	MFAP4	-	microfibrillar associated protein 4	125.852	0.0158079	0.0740126
GO:0014734	skeletal muscle hypertrophy	MYOC	GLC1A|GPOA|JOAG|JOAG1|TIGR	myocilin	125.852	0.0158079	0.0740126
GO:1903280	negative regulation of calcium:sodium antiporter activity	ATP1A2	FHM2|MHP2	ATPase Na+/K+ transporting subunit alpha 2	125.852	0.0158079	0.0740126
GO:1990079	cartilage homeostasis	CYTL1	C17|C4orf4	cytokine like 1	125.852	0.0158079	0.0740126
GO:0021793	chemorepulsion of branchiomotor axon	PLXNA4	FAYV2820|PLEXA4|PLXNA4A|PLXNA4B|PRO34003	plexin A4	125.852	0.0158079	0.0740126
GO:1904722	positive regulation of mRNA endonucleolytic cleavage involved in unfolded protein response	HSPA1A	HEL-S-103|HSP70-1|HSP70-1A|HSP70.1|HSP70I|HSP72|HSPA1	heat shock protein family A (Hsp70) member 1A	125.852	0.0158079	0.0740126
GO:0072254	metanephric glomerular mesangial cell differentiation	CD34	-	CD34 molecule	125.852	0.0158079	0.0740126
GO:0043954	cellular component maintenance	MYOCD	MYCD	myocardin	125.852	0.0158079	0.0740126
GO:0098542	defense response to other organism	IL31RA	CRL|CRL3|GLM-R|GLMR|GPL|IL-31RA|PLCA2|PRO21384|hGLM-R	interleukin 31 receptor A	125.852	0.0158079	0.0740126
GO:1900035	negative regulation of cellular response to heat	CD34	-	CD34 molecule	125.852	0.0158079	0.0740126
GO:1903141	negative regulation of establishment of endothelial barrier	S1PR3	EDG-3|EDG3|LPB3|S1P3	sphingosine-1-phosphate receptor 3	125.852	0.0158079	0.0740126
GO:1903006	positive regulation of protein K63-linked deubiquitination	VCP	ALS14|CMT2Y|HEL-220|HEL-S-70|IBMPFD|IBMPFD1|TERA|p97	valosin containing protein	125.852	0.0158079	0.0740126
GO:0071228	cellular response to tumor cell	TXNIP	EST01027|HHCPA78|THIF|VDUP1	thioredoxin interacting protein	125.852	0.0158079	0.0740126
GO:0034633	retinol transport	RBP4	MCOPCB10|RDCCAS	retinol binding protein 4	125.852	0.0158079	0.0740126
GO:0050923	regulation of negative chemotaxis	PLXNA4	FAYV2820|PLEXA4|PLXNA4A|PLXNA4B|PRO34003	plexin A4	125.852	0.0158079	0.0740126
GO:0048488	synaptic vesicle endocytosis	PIP5K1C	LCCS3|PIP5K-GAMMA|PIP5K1-gamma|PIP5Kgamma	phosphatidylinositol-4-phosphate 5-kinase, type I, gamma	10.9437	0.0168224	0.0766167
GO:0048488	synaptic vesicle endocytosis	NLGN4Y	-	neuroligin 4, Y-linked	10.9437	0.0168224	0.0766167
GO:0007186	G-protein coupled receptor signaling pathway	OR5V1	6M1-21|hs6M1-21	olfactory receptor family 5 subfamily V member 1	1.98416	0.0170861	0.0766167
GO:0007186	G-protein coupled receptor signaling pathway	ADRA1D	ADRA1|ADRA1A|ADRA1R|ALPHA1|DAR|dJ779E11.2	adrenoceptor alpha 1D	1.98416	0.0170861	0.0766167
GO:0007186	G-protein coupled receptor signaling pathway	CARTPT	CART	CART prepropeptide	1.98416	0.0170861	0.0766167
GO:0007186	G-protein coupled receptor signaling pathway	ADRA2C	ADRA2L2|ADRA2RL2|ADRARL2|ALPHA2CAR	adrenoceptor alpha 2C	1.98416	0.0170861	0.0766167
GO:0007186	G-protein coupled receptor signaling pathway	OR51B6	HOR5'Beta6	olfactory receptor family 51 subfamily B member 6	1.98416	0.0170861	0.0766167
GO:0007186	G-protein coupled receptor signaling pathway	OR52E6	OR11-58	olfactory receptor family 52 subfamily E member 6	1.98416	0.0170861	0.0766167
GO:0007186	G-protein coupled receptor signaling pathway	AKR1C2	AKR1C-pseudo|BABP|DD|DD-2|DD/BABP|DD2|DDH2|HAKRD|HBAB|MCDR2|SRXY8|TDD	aldo-keto reductase family 1, member C2	1.98416	0.0170861	0.0766167
GO:0007186	G-protein coupled receptor signaling pathway	P2RY14	BPR105|GPR105|P2Y14	purinergic receptor P2Y14	1.98416	0.0170861	0.0766167
GO:0007186	G-protein coupled receptor signaling pathway	MAS1L	MAS-L|MRG|dJ994E9.2	MAS1 proto-oncogene like, G protein-coupled receptor	1.98416	0.0170861	0.0766167
GO:0007186	G-protein coupled receptor signaling pathway	ACKR1	CCBP1|CD234|DARC|Dfy|FY|GPD|GpFy|WBCQ1	atypical chemokine receptor 1 (Duffy blood group)	1.98416	0.0170861	0.0766167
GO:0007186	G-protein coupled receptor signaling pathway	GPRC5A	GPCR5A|PEIG-1|RAI3|RAIG1|TIG1	G protein-coupled receptor class C group 5 member A	1.98416	0.0170861	0.0766167
GO:0007186	G-protein coupled receptor signaling pathway	PDGFRL	PDGRL|PRLTS	platelet derived growth factor receptor like	1.98416	0.0170861	0.0766167
GO:0007186	G-protein coupled receptor signaling pathway	GPRC5B	RAIG-2|RAIG2	G protein-coupled receptor class C group 5 member B	1.98416	0.0170861	0.0766167
GO:0007186	G-protein coupled receptor signaling pathway	S1PR3	EDG-3|EDG3|LPB3|S1P3	sphingosine-1-phosphate receptor 3	1.98416	0.0170861	0.0766167
GO:0030593	neutrophil chemotaxis	PIP5K1C	LCCS3|PIP5K-GAMMA|PIP5K1-gamma|PIP5Kgamma	phosphatidylinositol-4-phosphate 5-kinase, type I, gamma	5.80857	0.0172966	0.077153
GO:0030593	neutrophil chemotaxis	TGFB2	LDS4|TGF-beta2	transforming growth factor beta 2	5.80857	0.0172966	0.077153
GO:0030593	neutrophil chemotaxis	ITGA9	ALPHA-RLC|ITGA4L|RLC	integrin subunit alpha 9	5.80857	0.0172966	0.077153
GO:0008217	regulation of blood pressure	CD34	-	CD34 molecule	5.72056	0.0179763	0.079766
GO:0008217	regulation of blood pressure	NPY1R	NPY1-R|NPYR	neuropeptide Y receptor Y1	5.72056	0.0179763	0.079766
GO:0008217	regulation of blood pressure	ATP1A2	FHM2|MHP2	ATPase Na+/K+ transporting subunit alpha 2	5.72056	0.0179763	0.079766
GO:0048041	focal adhesion assembly	SORBS1	CAP|FLAF2|R85FL|SH3D5|SH3P12|SORB1	sorbin and SH3 domain containing 1	10.4877	0.0181282	0.0798832
GO:0048041	focal adhesion assembly	ACTN2	CMD1AA|CMH23	actinin alpha 2	10.4877	0.0181282	0.0798832
GO:0008360	regulation of cell shape	BAMBI	NMA	BMP and activin membrane-bound inhibitor	4.12631	0.0188962	0.0826954
GO:0008360	regulation of cell shape	PDPN	AGGRUS|GP36|GP40|Gp38|HT1A-1|OTS8|PA2.26|T1A|T1A-2|T1A2|TI1A	podoplanin	4.12631	0.0188962	0.0826954
GO:0008360	regulation of cell shape	ITGA7	-	integrin subunit alpha 7	4.12631	0.0188962	0.0826954
GO:0008360	regulation of cell shape	BVES	HBVES|LGMD2X|POP1|POPDC1	blood vessel epicardial substance	4.12631	0.0188962	0.0826954
GO:2001238	positive regulation of extrinsic apoptotic signaling pathway	ITM2C	BRI3|BRICD2C|E25|E25C|ITM3	integral membrane protein 2C	10.0682	0.0194753	0.0846478
GO:2001238	positive regulation of extrinsic apoptotic signaling pathway	TNFRSF12A	CD266|FN14|TWEAKR	tumor necrosis factor receptor superfamily member 12A	10.0682	0.0194753	0.0846478
GO:0030855	epithelial cell differentiation	UPK1B	TSPAN20|UPIB|UPK1	uroplakin 1B	5.3177	0.021595	0.0929096
GO:0030855	epithelial cell differentiation	AKR1C2	AKR1C-pseudo|BABP|DD|DD-2|DD/BABP|DD2|DDH2|HAKRD|HBAB|MCDR2|SRXY8|TDD	aldo-keto reductase family 1, member C2	5.3177	0.021595	0.0929096
GO:0030855	epithelial cell differentiation	AKR1C1	2-ALPHA-HSD|20-ALPHA-HSD|C9|DD1|DD1/DD2|DDH|DDH1|H-37|HAKRC|HBAB|MBAB	aldo-keto reductase family 1, member C1	5.3177	0.021595	0.0929096
GO:0032757	positive regulation of interleukin-8 production	HSPA1A	HEL-S-103|HSP70-1|HSP70-1A|HSP70.1|HSP70I|HSP72|HSPA1	heat shock protein family A (Hsp70) member 1A	9.3224	0.0222905	0.0929727
GO:0045214	sarcomere organization	KRT19	CK19|K19|K1CS	keratin 19	9.3224	0.0222905	0.0929727
GO:0016339	calcium-dependent cell-cell adhesion via plasma membrane cell adhesion molecules	PCDHB4	PCDH-BETA4	protocadherin beta 4	9.3224	0.0222905	0.0929727
GO:0032757	positive regulation of interleukin-8 production	HSPA1B	HSP70-1B|HSP70-2|HSP70.2	heat shock protein family A (Hsp70) member 1B	9.3224	0.0222905	0.0929727
GO:0016339	calcium-dependent cell-cell adhesion via plasma membrane cell adhesion molecules	DCHS1	CDH19|CDH25|CDHR6|FIB1|MVP2|PCDH16|VMLDS1	dachsous cadherin-related 1	9.3224	0.0222905	0.0929727
GO:0045214	sarcomere organization	ACTN2	CMD1AA|CMH23	actinin alpha 2	9.3224	0.0222905	0.0929727
GO:0060931	sinoatrial node cell development	BVES	HBVES|LGMD2X|POP1|POPDC1	blood vessel epicardial substance	62.9262	0.0236173	0.0929727
GO:0070253	somatostatin secretion	CARTPT	CART	CART prepropeptide	62.9262	0.0236173	0.0929727
GO:0021681	cerebellar granular layer development	FAIM2	LFG|LFG2|NGP35|NMP35|TMBIM2	Fas apoptotic inhibitory molecule 2	62.9262	0.0236173	0.0929727
GO:0002067	glandular epithelial cell differentiation	IL31RA	CRL|CRL3|GLM-R|GLMR|GPL|IL-31RA|PLCA2|PRO21384|hGLM-R	interleukin 31 receptor A	62.9262	0.0236173	0.0929727
GO:0010041	response to iron(III) ion	CYP1A1	AHH|AHRR|CP11|CYP1|CYPIA1|P1-450|P450-C|P450DX	cytochrome P450 family 1 subfamily A member 1	62.9262	0.0236173	0.0929727
GO:1902532	negative regulation of intracellular signal transduction	DDIT4	Dig2|REDD-1|REDD1	DNA damage inducible transcript 4	62.9262	0.0236173	0.0929727
GO:0070473	negative regulation of uterine smooth muscle contraction	ADRA2C	ADRA2L2|ADRA2RL2|ADRARL2|ALPHA2CAR	adrenoceptor alpha 2C	62.9262	0.0236173	0.0929727
GO:0032490	detection of molecule of bacterial origin	C4B	C4B1|C4B12|C4B2|C4B3|C4B5|C4BD|C4B_2|C4F|CH|CO4|CPAMD3	complement component 4B (Chido blood group)	62.9262	0.0236173	0.0929727
GO:0009115	xanthine catabolic process	AOX1	AO|AOH1	aldehyde oxidase 1	62.9262	0.0236173	0.0929727
GO:0021644	vagus nerve morphogenesis	PLXNA4	FAYV2820|PLEXA4|PLXNA4A|PLXNA4B|PRO34003	plexin A4	62.9262	0.0236173	0.0929727
GO:0071657	positive regulation of granulocyte colony-stimulating factor production	CD34	-	CD34 molecule	62.9262	0.0236173	0.0929727
GO:1900168	positive regulation of glial cell-derived neurotrophic factor secretion	CD34	-	CD34 molecule	62.9262	0.0236173	0.0929727
GO:0051946	regulation of glutamate uptake involved in transmission of nerve impulse	ATP1A2	FHM2|MHP2	ATPase Na+/K+ transporting subunit alpha 2	62.9262	0.0236173	0.0929727
GO:1904426	positive regulation of GTP binding	TGFB2	LDS4|TGF-beta2	transforming growth factor beta 2	62.9262	0.0236173	0.0929727
GO:0021784	postganglionic parasympathetic fiber development	PLXNA4	FAYV2820|PLEXA4|PLXNA4A|PLXNA4B|PRO34003	plexin A4	62.9262	0.0236173	0.0929727
GO:0055099	response to high density lipoprotein particle	ABCG1	ABC8|WHITE1	ATP binding cassette subfamily G member 1	62.9262	0.0236173	0.0929727
GO:0060973	cell migration involved in heart development	BVES	HBVES|LGMD2X|POP1|POPDC1	blood vessel epicardial substance	62.9262	0.0236173	0.0929727
GO:0086097	phospholipase C-activating angiotensin-activated signaling pathway	ACTN2	CMD1AA|CMH23	actinin alpha 2	62.9262	0.0236173	0.0929727
GO:0043241	protein complex disassembly	DDIT4	Dig2|REDD-1|REDD1	DNA damage inducible transcript 4	62.9262	0.0236173	0.0929727
GO:0010872	regulation of cholesterol esterification	ABCG1	ABC8|WHITE1	ATP binding cassette subfamily G member 1	62.9262	0.0236173	0.0929727
GO:2000724	positive regulation of cardiac vascular smooth muscle cell differentiation	MYOCD	MYCD	myocardin	62.9262	0.0236173	0.0929727
GO:0040017	positive regulation of locomotion	BVES	HBVES|LGMD2X|POP1|POPDC1	blood vessel epicardial substance	62.9262	0.0236173	0.0929727
GO:0045204	MAPK export from nucleus	DUSP16	MKP-7|MKP7	dual specificity phosphatase 16	62.9262	0.0236173	0.0929727
GO:0017143	insecticide metabolic process	CYP1A1	AHH|AHRR|CP11|CYP1|CYPIA1|P1-450|P450-C|P450DX	cytochrome P450 family 1 subfamily A member 1	62.9262	0.0236173	0.0929727
GO:1903263	positive regulation of serine phosphorylation of STAT3 protein	GFRA2	GDNFRB|NRTNR-ALPHA|NTNRA|RETL2|TRNR2	GDNF family receptor alpha 2	62.9262	0.0236173	0.0929727
GO:1900038	negative regulation of cellular response to hypoxia	CD34	-	CD34 molecule	62.9262	0.0236173	0.0929727
GO:0061162	establishment of monopolar cell polarity	MAP1B	FUTSCH|MAP5|PPP1R102	microtubule associated protein 1B	62.9262	0.0236173	0.0929727
GO:0042704	uterine wall breakdown	TGFB2	LDS4|TGF-beta2	transforming growth factor beta 2	62.9262	0.0236173	0.0929727
GO:0035733	hepatic stellate cell activation	MYOCD	MYCD	myocardin	62.9262	0.0236173	0.0929727
GO:0035051	cardiocyte differentiation	MYOCD	MYCD	myocardin	62.9262	0.0236173	0.0929727
GO:0035759	mesangial cell-matrix adhesion	CD34	-	CD34 molecule	62.9262	0.0236173	0.0929727
GO:0032488	Cdc42 protein signal transduction	NTN1	NTN1L	netrin 1	62.9262	0.0236173	0.0929727
GO:0048008	platelet-derived growth factor receptor signaling pathway	ARID5B	DESRT|MRF-2|MRF2	AT-rich interaction domain 5B	8.98945	0.0237572	0.0932351
GO:0048008	platelet-derived growth factor receptor signaling pathway	TXNIP	EST01027|HHCPA78|THIF|VDUP1	thioredoxin interacting protein	8.98945	0.0237572	0.0932351
GO:0001558	regulation of cell growth	FBLN5	ADCL2|ARCL1A|ARMD3|DANCE|EVEC|FIBL-5|HNARMD|UP50	fibulin 5	5.10212	0.0239423	0.0935293
GO:0001558	regulation of cell growth	WISP2	CCN5|CT58|CTGF-L	WNT1 inducible signaling pathway protein 2	5.10212	0.0239423	0.0935293
GO:0001558	regulation of cell growth	IGFBPL1	IGFBP-RP4|IGFBPRP4|bA113O24.1	insulin like growth factor binding protein-like 1	5.10212	0.0239423	0.0935293
GO:0046326	positive regulation of glucose import	SORBS1	CAP|FLAF2|R85FL|SH3D5|SH3P12|SORB1	sorbin and SH3 domain containing 1	8.67947	0.0252622	0.0974567
GO:0046326	positive regulation of glucose import	ITLN1	HL-1|HL1|INTL|ITLN|LFR|hIntL|omentin	intelectin 1	8.67947	0.0252622	0.0974567
GO:0010951	negative regulation of endopeptidase activity	CPAMD8	K-CAP|VIP	C3 and PZP like, alpha-2-macroglobulin domain containing 8	3.75679	0.0253303	0.0974567
GO:0098779	mitophagy in response to mitochondrial depolarization	SLC22A3	EMT|EMTH|OCT3	solute carrier family 22 member 3	3.75679	0.0253303	0.0974567
GO:0098779	mitophagy in response to mitochondrial depolarization	ASB2	ASB-2	ankyrin repeat and SOCS box containing 2	3.75679	0.0253303	0.0974567
GO:0010951	negative regulation of endopeptidase activity	SLPI	ALK1|ALP|BLPI|HUSI|HUSI-I|MPI|WAP4|WFDC4	secretory leukocyte peptidase inhibitor	3.75679	0.0253303	0.0974567
GO:0098779	mitophagy in response to mitochondrial depolarization	CD163L1	CD163B|M160	CD163 molecule like 1	3.75679	0.0253303	0.0974567
GO:0010951	negative regulation of endopeptidase activity	TIMP4	-	TIMP metallopeptidase inhibitor 4	3.75679	0.0253303	0.0974567
GO:0098779	mitophagy in response to mitochondrial depolarization	MYOM1	SKELEMIN	myomesin 1	3.75679	0.0253303	0.0974567
GO:0010951	negative regulation of endopeptidase activity	C4B	C4B1|C4B12|C4B2|C4B3|C4B5|C4BD|C4B_2|C4F|CH|CO4|CPAMD3	complement component 4B (Chido blood group)	3.75679	0.0253303	0.0974567
GO:0030324	lung development	RBP4	MCOPCB10|RDCCAS	retinol binding protein 4	4.90334	0.0264215	0.100282
GO:0030324	lung development	PDPN	AGGRUS|GP36|GP40|Gp38|HT1A-1|OTS8|PA2.26|T1A|T1A-2|T1A2|TI1A	podoplanin	4.90334	0.0264215	0.100282
GO:0030324	lung development	FSTL3	FLRG|FSRP	follistatin like 3	4.90334	0.0264215	0.100282
GO:0016311	dephosphorylation	NT5DC3	TU12B1-TY|TU12B1TY	5'-nucleotidase domain containing 3	4.84047	0.0272772	0.100282
GO:0016311	dephosphorylation	DUSP16	MKP-7|MKP7	dual specificity phosphatase 16	4.84047	0.0272772	0.100282
GO:0016311	dephosphorylation	CA3	CAIII|Car3	carbonic anhydrase III	4.84047	0.0272772	0.100282
GO:0006766	vitamin metabolic process	ENPP1	ARHR2|COLED|M6S1|NPP1|NPPS|PC-1|PCA1|PDNP1	ectonucleotide pyrophosphatase/phosphodiesterase 1	3.64789	0.0277322	0.100282
GO:0006766	vitamin metabolic process	AOX1	AO|AOH1	aldehyde oxidase 1	3.64789	0.0277322	0.100282
GO:0006766	vitamin metabolic process	RBP4	MCOPCB10|RDCCAS	retinol binding protein 4	3.64789	0.0277322	0.100282
GO:0006766	vitamin metabolic process	AKR1C1	2-ALPHA-HSD|20-ALPHA-HSD|C9|DD1|DD1/DD2|DDH|DDH1|H-37|HAKRC|HBAB|MBAB	aldo-keto reductase family 1, member C1	3.64789	0.0277322	0.100282
GO:0046677	response to antibiotic	CYP1A1	AHH|AHRR|CP11|CYP1|CYPIA1|P1-450|P450-C|P450DX	cytochrome P450 family 1 subfamily A member 1	8.11951	0.0283847	0.100282
GO:0060325	face morphogenesis	TGFB2	LDS4|TGF-beta2	transforming growth factor beta 2	8.11951	0.0283847	0.100282
GO:0046677	response to antibiotic	AOC3	HPAO|SSAO|VAP-1|VAP1	amine oxidase, copper containing 3	8.11951	0.0283847	0.100282
GO:0060325	face morphogenesis	ARID5B	DESRT|MRF-2|MRF2	AT-rich interaction domain 5B	8.11951	0.0283847	0.100282
GO:0008283	cell proliferation	CHRM4	HM4|M4R	cholinergic receptor muscarinic 4	2.45395	0.029709	0.100282
GO:0008283	cell proliferation	DDIT4	Dig2|REDD-1|REDD1	DNA damage inducible transcript 4	2.45395	0.029709	0.100282
GO:0008283	cell proliferation	CD34	-	CD34 molecule	2.45395	0.029709	0.100282
GO:0008283	cell proliferation	ADRA1D	ADRA1|ADRA1A|ADRA1R|ALPHA1|DAR|dJ779E11.2	adrenoceptor alpha 1D	2.45395	0.029709	0.100282
GO:0008283	cell proliferation	CYP1A1	AHH|AHRR|CP11|CYP1|CYPIA1|P1-450|P450-C|P450DX	cytochrome P450 family 1 subfamily A member 1	2.45395	0.029709	0.100282
GO:0008283	cell proliferation	PDPN	AGGRUS|GP36|GP40|Gp38|HT1A-1|OTS8|PA2.26|T1A|T1A-2|T1A2|TI1A	podoplanin	2.45395	0.029709	0.100282
GO:0008283	cell proliferation	TGFB2	LDS4|TGF-beta2	transforming growth factor beta 2	2.45395	0.029709	0.100282
GO:2001240	negative regulation of extrinsic apoptotic signaling pathway in absence of ligand	HSPA1A	HEL-S-103|HSP70-1|HSP70-1A|HSP70.1|HSP70I|HSP72|HSPA1	heat shock protein family A (Hsp70) member 1A	7.86577	0.0300007	0.100282
GO:0072593	reactive oxygen species metabolic process	DDIT4	Dig2|REDD-1|REDD1	DNA damage inducible transcript 4	7.86577	0.0300007	0.100282
GO:2001240	negative regulation of extrinsic apoptotic signaling pathway in absence of ligand	HSPA1B	HSP70-1B|HSP70-2|HSP70.2	heat shock protein family A (Hsp70) member 1B	7.86577	0.0300007	0.100282
GO:0072593	reactive oxygen species metabolic process	AOX1	AO|AOH1	aldehyde oxidase 1	7.86577	0.0300007	0.100282
GO:0007229	integrin-mediated signaling pathway	ITGA7	-	integrin subunit alpha 7	4.60435	0.0308455	0.100282
GO:0007229	integrin-mediated signaling pathway	NEDD9	CAS-L|CAS2|CASL|CASS2|HEF1	neural precursor cell expressed, developmentally down-regulated 9	4.60435	0.0308455	0.100282
GO:0007229	integrin-mediated signaling pathway	ITGA9	ALPHA-RLC|ITGA4L|RLC	integrin subunit alpha 9	4.60435	0.0308455	0.100282
GO:0043506	regulation of JUN kinase activity	TNXB	EDS3|HXBL|TENX|TN-X|TNX|TNXB1|TNXB2|TNXBS|VUR8|XB|XBS	tenascin XB	41.9508	0.0313644	0.100282
GO:0045988	negative regulation of striated muscle contraction	ATP1A2	FHM2|MHP2	ATPase Na+/K+ transporting subunit alpha 2	41.9508	0.0313644	0.100282
GO:1900222	negative regulation of beta-amyloid clearance	MYOCD	MYCD	myocardin	41.9508	0.0313644	0.100282
GO:0035745	T-helper 2 cell cytokine production	IL31RA	CRL|CRL3|GLM-R|GLMR|GPL|IL-31RA|PLCA2|PRO21384|hGLM-R	interleukin 31 receptor A	41.9508	0.0313644	0.100282
GO:1903170	negative regulation of calcium ion transmembrane transport	ATP1A2	FHM2|MHP2	ATPase Na+/K+ transporting subunit alpha 2	41.9508	0.0313644	0.100282
GO:0019062	virion attachment to host cell	CD209	CDSIGN|CLEC4L|DC-SIGN|DC-SIGN1	CD209 molecule	41.9508	0.0313644	0.100282
GO:0010002	cardioblast differentiation	TGFB2	LDS4|TGF-beta2	transforming growth factor beta 2	41.9508	0.0313644	0.100282
GO:1903659	regulation of complement-dependent cytotoxicity	TGFB2	LDS4|TGF-beta2	transforming growth factor beta 2	41.9508	0.0313644	0.100282
GO:0046968	peptide antigen transport	CD209	CDSIGN|CLEC4L|DC-SIGN|DC-SIGN1	CD209 molecule	41.9508	0.0313644	0.100282
GO:2001015	negative regulation of skeletal muscle cell differentiation	MYOCD	MYCD	myocardin	41.9508	0.0313644	0.100282
GO:0071883	activation of MAPK activity by adrenergic receptor signaling pathway	ADRA2C	ADRA2L2|ADRA2RL2|ADRARL2|ALPHA2CAR	adrenoceptor alpha 2C	41.9508	0.0313644	0.100282
GO:0035886	vascular smooth muscle cell differentiation	MYOCD	MYCD	myocardin	41.9508	0.0313644	0.100282
GO:0051795	positive regulation of catagen	TGFB2	LDS4|TGF-beta2	transforming growth factor beta 2	41.9508	0.0313644	0.100282
GO:0006931	substrate-dependent cell migration, cell attachment to substrate	TNFRSF12A	CD266|FN14|TWEAKR	tumor necrosis factor receptor superfamily member 12A	41.9508	0.0313644	0.100282
GO:0032651	regulation of interleukin-1 beta production	S1PR3	EDG-3|EDG3|LPB3|S1P3	sphingosine-1-phosphate receptor 3	41.9508	0.0313644	0.100282
GO:0032642	regulation of chemokine production	ACKR1	CCBP1|CD234|DARC|Dfy|FY|GPD|GpFy|WBCQ1	atypical chemokine receptor 1 (Duffy blood group)	41.9508	0.0313644	0.100282
GO:0048807	female genitalia morphogenesis	RBP4	MCOPCB10|RDCCAS	retinol binding protein 4	41.9508	0.0313644	0.100282
GO:0019538	protein metabolic process	BAG2	BAG-2|dJ417I1.2	BCL2 associated athanogene 2	41.9508	0.0313644	0.100282
GO:2000721	positive regulation of transcription from RNA polymerase II promoter involved in smooth muscle cell differentiation	MYOCD	MYCD	myocardin	41.9508	0.0313644	0.100282
GO:0034436	glycoprotein transport	ABCG1	ABC8|WHITE1	ATP binding cassette subfamily G member 1	41.9508	0.0313644	0.100282
GO:1900138	negative regulation of phospholipase A2 activity	ANXA8	ANX8|CH17-360D5.2	annexin A8	41.9508	0.0313644	0.100282
GO:0009792	embryo development ending in birth or egg hatching	CYP1A1	AHH|AHRR|CP11|CYP1|CYPIA1|P1-450|P450-C|P450DX	cytochrome P450 family 1 subfamily A member 1	41.9508	0.0313644	0.100282
GO:0070988	demethylation	CYP1A1	AHH|AHRR|CP11|CYP1|CYPIA1|P1-450|P450-C|P450DX	cytochrome P450 family 1 subfamily A member 1	41.9508	0.0313644	0.100282
GO:0045726	positive regulation of integrin biosynthetic process	TGFB2	LDS4|TGF-beta2	transforming growth factor beta 2	41.9508	0.0313644	0.100282
GO:0010693	negative regulation of alkaline phosphatase activity	TGFB2	LDS4|TGF-beta2	transforming growth factor beta 2	41.9508	0.0313644	0.100282
GO:0042816	vitamin B6 metabolic process	AOX1	AO|AOH1	aldehyde oxidase 1	41.9508	0.0313644	0.100282
GO:0070093	negative regulation of glucagon secretion	CARTPT	CART	CART prepropeptide	41.9508	0.0313644	0.100282
GO:0030505	inorganic diphosphate transport	ENPP1	ARHR2|COLED|M6S1|NPP1|NPPS|PC-1|PCA1|PDNP1	ectonucleotide pyrophosphatase/phosphodiesterase 1	41.9508	0.0313644	0.100282
GO:1903416	response to glycoside	ATP1A2	FHM2|MHP2	ATPase Na+/K+ transporting subunit alpha 2	41.9508	0.0313644	0.100282
GO:0001560	regulation of cell growth by extracellular stimulus	MYOCD	MYCD	myocardin	41.9508	0.0313644	0.100282
GO:0072011	glomerular endothelium development	CD34	-	CD34 molecule	41.9508	0.0313644	0.100282
GO:0003192	mitral valve formation	DCHS1	CDH19|CDH25|CDHR6|FIB1|MVP2|PCDH16|VMLDS1	dachsous cadherin-related 1	41.9508	0.0313644	0.100282
GO:0010718	positive regulation of epithelial to mesenchymal transition	TGFB2	LDS4|TGF-beta2	transforming growth factor beta 2	7.62742	0.0316523	0.100282
GO:0010718	positive regulation of epithelial to mesenchymal transition	BAMBI	NMA	BMP and activin membrane-bound inhibitor	7.62742	0.0316523	0.100282
GO:0046718	viral entry into host cell	HSPA1A	HEL-S-103|HSP70-1|HSP70-1A|HSP70.1|HSP70I|HSP72|HSPA1	heat shock protein family A (Hsp70) member 1A	4.54888	0.0317738	0.100282
GO:0002576	platelet degranulation	ACTN2	CMD1AA|CMH23	actinin alpha 2	4.54888	0.0317738	0.100282
GO:0002576	platelet degranulation	TGFB2	LDS4|TGF-beta2	transforming growth factor beta 2	4.54888	0.0317738	0.100282
GO:0046718	viral entry into host cell	CD209	CDSIGN|CLEC4L|DC-SIGN|DC-SIGN1	CD209 molecule	4.54888	0.0317738	0.100282
GO:0046718	viral entry into host cell	HSPA1B	HSP70-1B|HSP70-2|HSP70.2	heat shock protein family A (Hsp70) member 1B	4.54888	0.0317738	0.100282
GO:0002576	platelet degranulation	CFD	ADIPSIN|ADN|DF|PFD	complement factor D (adipsin)	4.54888	0.0317738	0.100282
GO:0007411	axon guidance	TGFB2	LDS4|TGF-beta2	transforming growth factor beta 2	2.10926	0.0345348	0.107007
GO:0007411	axon guidance	NTN1	NTN1L	netrin 1	2.10926	0.0345348	0.107007
GO:0007411	axon guidance	ACTN2	CMD1AA|CMH23	actinin alpha 2	2.10926	0.0345348	0.107007
GO:0007411	axon guidance	ITGA9	ALPHA-RLC|ITGA4L|RLC	integrin subunit alpha 9	2.10926	0.0345348	0.107007
GO:0007411	axon guidance	RHOB	ARH6|ARHB|MST081|MSTP081|RHOH6	ras homolog family member B	2.10926	0.0345348	0.107007
GO:0007411	axon guidance	CACNB2	CACNLB2|CAVB2|MYSB	calcium voltage-gated channel auxiliary subunit beta 2	2.10926	0.0345348	0.107007
GO:0007411	axon guidance	PLXNA4	FAYV2820|PLEXA4|PLXNA4A|PLXNA4B|PRO34003	plexin A4	2.10926	0.0345348	0.107007
GO:0007411	axon guidance	LAMA2	LAMM	laminin subunit alpha 2	2.10926	0.0345348	0.107007
GO:0007411	axon guidance	PIP5K1C	LCCS3|PIP5K-GAMMA|PIP5K1-gamma|PIP5Kgamma	phosphatidylinositol-4-phosphate 5-kinase, type I, gamma	2.10926	0.0345348	0.107007
GO:1901998	toxin transport	SLC22A3	EMT|EMTH|OCT3	solute carrier family 22 member 3	7.19156	0.0350596	0.107846
GO:0048286	lung alveolus development	PDPN	AGGRUS|GP36|GP40|Gp38|HT1A-1|OTS8|PA2.26|T1A|T1A-2|T1A2|TI1A	podoplanin	7.19156	0.0350596	0.107846
GO:0022008	neurogenesis	DCHS1	CDH19|CDH25|CDHR6|FIB1|MVP2|PCDH16|VMLDS1	dachsous cadherin-related 1	7.19156	0.0350596	0.107846
GO:0048286	lung alveolus development	MYOCD	MYCD	myocardin	7.19156	0.0350596	0.107846
GO:1901998	toxin transport	ABCG1	ABC8|WHITE1	ATP binding cassette subfamily G member 1	7.19156	0.0350596	0.107846
GO:0022008	neurogenesis	CHAC1	-	ChaC glutathione-specific gamma-glutamylcyclotransferase 1	7.19156	0.0350596	0.107846
GO:0007517	muscle organ development	ITGA7	-	integrin subunit alpha 7	4.29042	0.0366315	0.111603
GO:0007517	muscle organ development	BVES	HBVES|LGMD2X|POP1|POPDC1	blood vessel epicardial substance	4.29042	0.0366315	0.111603
GO:0007517	muscle organ development	LAMA2	LAMM	laminin subunit alpha 2	4.29042	0.0366315	0.111603
GO:0007156	homophilic cell adhesion via plasma membrane adhesion molecules	DCHS1	CDH19|CDH25|CDHR6|FIB1|MVP2|PCDH16|VMLDS1	dachsous cadherin-related 1	3.26889	0.0386525	0.112638
GO:0007156	homophilic cell adhesion via plasma membrane adhesion molecules	PCDH11Y	PCDH-PC|PCDH22|PCDHX|PCDHY	protocadherin 11 Y-linked	3.26889	0.0386525	0.112638
GO:0007156	homophilic cell adhesion via plasma membrane adhesion molecules	CDH8	Nbla04261	cadherin 8	3.26889	0.0386525	0.112638
GO:0007156	homophilic cell adhesion via plasma membrane adhesion molecules	PCDHB4	PCDH-BETA4	protocadherin beta 4	3.26889	0.0386525	0.112638
GO:0035625	epidermal growth factor-activated receptor transactivation by G-protein coupled receptor signaling pathway	ADRA2C	ADRA2L2|ADRA2RL2|ADRARL2|ALPHA2CAR	adrenoceptor alpha 2C	31.4631	0.0390495	0.112638
GO:0030035	microspike assembly	ACTN2	CMD1AA|CMH23	actinin alpha 2	31.4631	0.0390495	0.112638
GO:0038001	paracrine signaling	CD34	-	CD34 molecule	31.4631	0.0390495	0.112638
GO:0021615	glossopharyngeal nerve morphogenesis	PLXNA4	FAYV2820|PLEXA4|PLXNA4A|PLXNA4B|PRO34003	plexin A4	31.4631	0.0390495	0.112638
GO:1903862	positive regulation of oxidative phosphorylation	VCP	ALS14|CMT2Y|HEL-220|HEL-S-70|IBMPFD|IBMPFD1|TERA|p97	valosin containing protein	31.4631	0.0390495	0.112638
GO:0046683	response to organophosphorus	AKR1C1	2-ALPHA-HSD|20-ALPHA-HSD|C9|DD1|DD1/DD2|DDH|DDH1|H-37|HAKRC|HBAB|MBAB	aldo-keto reductase family 1, member C1	31.4631	0.0390495	0.112638
GO:0030730	sequestering of triglyceride	ENPP1	ARHR2|COLED|M6S1|NPP1|NPPS|PC-1|PCA1|PDNP1	ectonucleotide pyrophosphatase/phosphodiesterase 1	31.4631	0.0390495	0.112638
GO:1900041	negative regulation of interleukin-2 secretion	CD34	-	CD34 molecule	31.4631	0.0390495	0.112638
GO:0071248	cellular response to metal ion	FSTL3	FLRG|FSRP	follistatin like 3	31.4631	0.0390495	0.112638
GO:2001137	positive regulation of endocytic recycling	ACTN2	CMD1AA|CMH23	actinin alpha 2	31.4631	0.0390495	0.112638
GO:0045661	regulation of myoblast differentiation	MYOCD	MYCD	myocardin	31.4631	0.0390495	0.112638
GO:2001135	regulation of endocytic recycling	BVES	HBVES|LGMD2X|POP1|POPDC1	blood vessel epicardial substance	31.4631	0.0390495	0.112638
GO:0010918	positive regulation of mitochondrial membrane potential	VCP	ALS14|CMT2Y|HEL-220|HEL-S-70|IBMPFD|IBMPFD1|TERA|p97	valosin containing protein	31.4631	0.0390495	0.112638
GO:0001994	norepinephrine-epinephrine vasoconstriction involved in regulation of systemic arterial blood pressure	ADRA1D	ADRA1|ADRA1A|ADRA1R|ALPHA1|DAR|dJ779E11.2	adrenoceptor alpha 1D	31.4631	0.0390495	0.112638
GO:0019695	choline metabolic process	ENPP6	NPP6	ectonucleotide pyrophosphatase/phosphodiesterase 6	31.4631	0.0390495	0.112638
GO:0032387	negative regulation of intracellular transport	MAP1B	FUTSCH|MAP5|PPP1R102	microtubule associated protein 1B	31.4631	0.0390495	0.112638
GO:0003257	positive regulation of transcription from RNA polymerase II promoter involved in myocardial precursor cell differentiation	MYOCD	MYCD	myocardin	31.4631	0.0390495	0.112638
GO:0061041	regulation of wound healing	TNFRSF12A	CD266|FN14|TWEAKR	tumor necrosis factor receptor superfamily member 12A	31.4631	0.0390495	0.112638
GO:0009988	cell-cell recognition	CD209	CDSIGN|CLEC4L|DC-SIGN|DC-SIGN1	CD209 molecule	31.4631	0.0390495	0.112638
GO:0042904	9-cis-retinoic acid biosynthetic process	CYP1A1	AHH|AHRR|CP11|CYP1|CYPIA1|P1-450|P450-C|P450DX	cytochrome P450 family 1 subfamily A member 1	31.4631	0.0390495	0.112638
GO:0009987	cellular process	MAP1B	FUTSCH|MAP5|PPP1R102	microtubule associated protein 1B	31.4631	0.0390495	0.112638
GO:0051152	positive regulation of smooth muscle cell differentiation	MYOCD	MYCD	myocardin	31.4631	0.0390495	0.112638
GO:0018879	biphenyl metabolic process	CYP4B1	CYPIVB1|P-450HP	cytochrome P450 family 4 subfamily B member 1	31.4631	0.0390495	0.112638
GO:1990573	potassium ion import across plasma membrane	ATP1A2	FHM2|MHP2	ATPase Na+/K+ transporting subunit alpha 2	31.4631	0.0390495	0.112638
GO:0003273	cell migration involved in endocardial cushion formation	DCHS1	CDH19|CDH25|CDHR6|FIB1|MVP2|PCDH16|VMLDS1	dachsous cadherin-related 1	31.4631	0.0390495	0.112638
GO:0032909	regulation of transforming growth factor beta2 production	TGFB2	LDS4|TGF-beta2	transforming growth factor beta 2	31.4631	0.0390495	0.112638
GO:0007219	Notch signaling pathway	S1PR3	EDG-3|EDG3|LPB3|S1P3	sphingosine-1-phosphate receptor 3	3.22698	0.0401663	0.114819
GO:0007219	Notch signaling pathway	TIMP4	-	TIMP metallopeptidase inhibitor 4	3.22698	0.0401663	0.114819
GO:0007219	Notch signaling pathway	CHAC1	-	ChaC glutathione-specific gamma-glutamylcyclotransferase 1	3.22698	0.0401663	0.114819
GO:0007219	Notch signaling pathway	KRT19	CK19|K19|K1CS	keratin 19	3.22698	0.0401663	0.114819
GO:0001942	hair follicle development	APCDD1	B7323|DRAPC1|FP7019|HHS|HTS|HYPT1	adenomatosis polyposis coli down-regulated 1	6.62381	0.040421	0.115031
GO:0051781	positive regulation of cell division	TGFB2	LDS4|TGF-beta2	transforming growth factor beta 2	6.62381	0.040421	0.115031
GO:0001942	hair follicle development	TGFB2	LDS4|TGF-beta2	transforming growth factor beta 2	6.62381	0.040421	0.115031
GO:0051781	positive regulation of cell division	GAREM1	C18orf11|FAM59A|GAREM|Gm944	GRB2 associated regulator of MAPK1 subtype 1	6.62381	0.040421	0.115031
GO:0032570	response to progesterone	TGFB2	LDS4|TGF-beta2	transforming growth factor beta 2	6.29262	0.0441548	0.125376
GO:0032570	response to progesterone	TXNIP	EST01027|HHCPA78|THIF|VDUP1	thioredoxin interacting protein	6.29262	0.0441548	0.125376
GO:0061042	vascular wound healing	CD34	-	CD34 molecule	25.1705	0.0466733	0.126196
GO:0033564	anterior/posterior axon guidance	NTN1	NTN1L	netrin 1	25.1705	0.0466733	0.126196
GO:0009804	coumarin metabolic process	CYP1A1	AHH|AHRR|CP11|CYP1|CYPIA1|P1-450|P450-C|P450DX	cytochrome P450 family 1 subfamily A member 1	25.1705	0.0466733	0.126196
GO:0015697	quaternary ammonium group transport	SLC22A3	EMT|EMTH|OCT3	solute carrier family 22 member 3	25.1705	0.0466733	0.126196
GO:0006572	tyrosine catabolic process	HPD	4-HPPD|4HPPD|GLOD3|HPPDASE|PPD	4-hydroxyphenylpyruvate dioxygenase	25.1705	0.0466733	0.126196
GO:0010936	negative regulation of macrophage cytokine production	TGFB2	LDS4|TGF-beta2	transforming growth factor beta 2	25.1705	0.0466733	0.126196
GO:0006771	riboflavin metabolic process	ENPP1	ARHR2|COLED|M6S1|NPP1|NPPS|PC-1|PCA1|PDNP1	ectonucleotide pyrophosphatase/phosphodiesterase 1	25.1705	0.0466733	0.126196
GO:0048562	embryonic organ morphogenesis	RBP4	MCOPCB10|RDCCAS	retinol binding protein 4	25.1705	0.0466733	0.126196
GO:0035860	glial cell-derived neurotrophic factor receptor signaling pathway	GFRA2	GDNFRB|NRTNR-ALPHA|NTNRA|RETL2|TRNR2	GDNF family receptor alpha 2	25.1705	0.0466733	0.126196
GO:0042482	positive regulation of odontogenesis	CD34	-	CD34 molecule	25.1705	0.0466733	0.126196
GO:0060613	fat pad development	ARID5B	DESRT|MRF-2|MRF2	AT-rich interaction domain 5B	25.1705	0.0466733	0.126196
GO:0021960	anterior commissure morphogenesis	PLXNA4	FAYV2820|PLEXA4|PLXNA4A|PLXNA4B|PRO34003	plexin A4	25.1705	0.0466733	0.126196
GO:0038031	non-canonical Wnt signaling pathway via JNK cascade	MYOC	GLC1A|GPOA|JOAG|JOAG1|TIGR	myocilin	25.1705	0.0466733	0.126196
GO:0032367	intracellular cholesterol transport	ABCG1	ABC8|WHITE1	ATP binding cassette subfamily G member 1	25.1705	0.0466733	0.126196
GO:0003179	heart valve morphogenesis	TGFB2	LDS4|TGF-beta2	transforming growth factor beta 2	25.1705	0.0466733	0.126196
GO:0071799	cellular response to prostaglandin D stimulus	AKR1C2	AKR1C-pseudo|BABP|DD|DD-2|DD/BABP|DD2|DDH2|HAKRD|HBAB|MCDR2|SRXY8|TDD	aldo-keto reductase family 1, member C2	25.1705	0.0466733	0.126196
GO:0051891	positive regulation of cardioblast differentiation	TGFB2	LDS4|TGF-beta2	transforming growth factor beta 2	25.1705	0.0466733	0.126196
GO:0035791	platelet-derived growth factor receptor-beta signaling pathway	PDGFRL	PDGRL|PRLTS	platelet derived growth factor receptor like	25.1705	0.0466733	0.126196
GO:0070863	positive regulation of protein exit from endoplasmic reticulum	TMEM30B	CDC50B	transmembrane protein 30B	25.1705	0.0466733	0.126196
GO:0006068	ethanol catabolic process	ALDH1B1	ALDH5|ALDHX	aldehyde dehydrogenase 1 family member B1	25.1705	0.0466733	0.126196
GO:0045823	positive regulation of heart contraction	TGFB2	LDS4|TGF-beta2	transforming growth factor beta 2	25.1705	0.0466733	0.126196
GO:2001028	positive regulation of endothelial cell chemotaxis	HSPB1	CMT2F|HEL-S-102|HMN2B|HS.76067|HSP27|HSP28|Hsp25|SRP27	heat shock protein family B (small) member 1	25.1705	0.0466733	0.126196
GO:0021637	trigeminal nerve structural organization	PLXNA4	FAYV2820|PLEXA4|PLXNA4A|PLXNA4B|PRO34003	plexin A4	25.1705	0.0466733	0.126196
GO:0060603	mammary gland duct morphogenesis	NTN1	NTN1L	netrin 1	25.1705	0.0466733	0.126196
GO:1901029	negative regulation of mitochondrial outer membrane permeabilization involved in apoptotic signaling pathway	HSPA1A	HEL-S-103|HSP70-1|HSP70-1A|HSP70.1|HSP70I|HSP72|HSPA1	heat shock protein family A (Hsp70) member 1A	25.1705	0.0466733	0.126196
GO:2001171	positive regulation of ATP biosynthetic process	VCP	ALS14|CMT2Y|HEL-220|HEL-S-70|IBMPFD|IBMPFD1|TERA|p97	valosin containing protein	25.1705	0.0466733	0.126196
GO:0030240	skeletal muscle thin filament assembly	ACTC1	ACTC|ASD5|CMD1R|CMH11|LVNC4	actin, alpha, cardiac muscle 1	25.1705	0.0466733	0.126196
GO:0045542	positive regulation of cholesterol biosynthetic process	ABCG1	ABC8|WHITE1	ATP binding cassette subfamily G member 1	25.1705	0.0466733	0.126196
GO:0038033	positive regulation of endothelial cell chemotaxis by VEGF-activated vascular endothelial growth factor receptor signaling pathway	HSPB1	CMT2F|HEL-S-102|HMN2B|HS.76067|HSP27|HSP28|Hsp25|SRP27	heat shock protein family B (small) member 1	25.1705	0.0466733	0.126196
GO:0040012	regulation of locomotion	CHRM4	HM4|M4R	cholinergic receptor muscarinic 4	25.1705	0.0466733	0.126196
GO:0009143	nucleoside triphosphate catabolic process	ENPP1	ARHR2|COLED|M6S1|NPP1|NPPS|PC-1|PCA1|PDNP1	ectonucleotide pyrophosphatase/phosphodiesterase 1	25.1705	0.0466733	0.126196
GO:0040023	establishment of nucleus localization	NTN1	NTN1L	netrin 1	25.1705	0.0466733	0.126196
GO:0070842	aggresome assembly	VCP	ALS14|CMT2Y|HEL-220|HEL-S-70|IBMPFD|IBMPFD1|TERA|p97	valosin containing protein	25.1705	0.0466733	0.126196
GO:0003231	cardiac ventricle development	MYOCD	MYCD	myocardin	25.1705	0.0466733	0.126196
GO:0001504	neurotransmitter uptake	ATP1A2	FHM2|MHP2	ATPase Na+/K+ transporting subunit alpha 2	25.1705	0.0466733	0.126196
GO:0070389	chaperone cofactor-dependent protein refolding	DNAJB1	HSPF1|Hdj1|Hsp40|RSPH16B|Sis1	DnaJ heat shock protein family (Hsp40) member B1	25.1705	0.0466733	0.126196
GO:0031397	negative regulation of protein ubiquitination	HSPA1B	HSP70-1B|HSP70-2|HSP70.2	heat shock protein family A (Hsp70) member 1B	5.99297	0.0480103	0.128718
GO:0031397	negative regulation of protein ubiquitination	HSPA1A	HEL-S-103|HSP70-1|HSP70-1A|HSP70.1|HSP70I|HSP72|HSPA1	heat shock protein family A (Hsp70) member 1A	5.99297	0.0480103	0.128718
GO:0007165	signal transduction	SMOC1	OAS	SPARC related modular calcium binding 1	1.70071	0.0490039	0.129474
GO:0007165	signal transduction	OR51B6	HOR5'Beta6	olfactory receptor family 51 subfamily B member 6	1.70071	0.0490039	0.129474
GO:0007165	signal transduction	ASB2	ASB-2	ankyrin repeat and SOCS box containing 2	1.70071	0.0490039	0.129474
GO:0007165	signal transduction	LYVE1	CRSBP-1|HAR|LYVE-1|XLKD1	lymphatic vessel endothelial hyaluronan receptor 1	1.70071	0.0490039	0.129474
GO:0007165	signal transduction	CHRM4	HM4|M4R	cholinergic receptor muscarinic 4	1.70071	0.0490039	0.129474
GO:0007165	signal transduction	CD34	-	CD34 molecule	1.70071	0.0490039	0.129474
GO:0007165	signal transduction	NEDD9	CAS-L|CAS2|CASL|CASS2|HEF1	neural precursor cell expressed, developmentally down-regulated 9	1.70071	0.0490039	0.129474
GO:0007165	signal transduction	OR52E6	OR11-58	olfactory receptor family 52 subfamily E member 6	1.70071	0.0490039	0.129474
GO:0007165	signal transduction	KCNIP3	CSEN|DREAM|KCHIP3	potassium voltage-gated channel interacting protein 3	1.70071	0.0490039	0.129474
GO:0007165	signal transduction	WISP2	CCN5|CT58|CTGF-L	WNT1 inducible signaling pathway protein 2	1.70071	0.0490039	0.129474
GO:0007165	signal transduction	CYTL1	C17|C4orf4	cytokine like 1	1.70071	0.0490039	0.129474
GO:0007165	signal transduction	CARTPT	CART	CART prepropeptide	1.70071	0.0490039	0.129474
GO:0007165	signal transduction	PDPN	AGGRUS|GP36|GP40|Gp38|HT1A-1|OTS8|PA2.26|T1A|T1A-2|T1A2|TI1A	podoplanin	1.70071	0.0490039	0.129474
GO:0007165	signal transduction	GPRC5A	GPCR5A|PEIG-1|RAI3|RAIG1|TIG1	G protein-coupled receptor class C group 5 member A	1.70071	0.0490039	0.129474
GO:0051091	positive regulation of sequence-specific DNA binding transcription factor activity	CYTL1	C17|C4orf4	cytokine like 1	3.70154	0.0521043	0.136955
GO:0051091	positive regulation of sequence-specific DNA binding transcription factor activity	MYOCD	MYCD	myocardin	3.70154	0.0521043	0.136955
GO:0051091	positive regulation of sequence-specific DNA binding transcription factor activity	ARID5B	DESRT|MRF-2|MRF2	AT-rich interaction domain 5B	3.70154	0.0521043	0.136955
GO:0007157	heterophilic cell-cell adhesion via plasma membrane cell adhesion molecules	CD209	CDSIGN|CLEC4L|DC-SIGN|DC-SIGN1	CD209 molecule	5.59344	0.0540114	0.137726
GO:0007157	heterophilic cell-cell adhesion via plasma membrane cell adhesion molecules	DCHS1	CDH19|CDH25|CDHR6|FIB1|MVP2|PCDH16|VMLDS1	dachsous cadherin-related 1	5.59344	0.0540114	0.137726
GO:0061154	endothelial tube morphogenesis	RHOB	ARH6|ARHB|MST081|MSTP081|RHOH6	ras homolog family member B	20.9754	0.0542362	0.137726
GO:0071636	positive regulation of transforming growth factor beta production	CD34	-	CD34 molecule	20.9754	0.0542362	0.137726
GO:0055012	ventricular cardiac muscle cell differentiation	MYOCD	MYCD	myocardin	20.9754	0.0542362	0.137726
GO:0060706	cell differentiation involved in embryonic placenta development	KRT19	CK19|K19|K1CS	keratin 19	20.9754	0.0542362	0.137726
GO:0048553	negative regulation of metalloenzyme activity	TIMP4	-	TIMP metallopeptidase inhibitor 4	20.9754	0.0542362	0.137726
GO:2001259	positive regulation of cation channel activity	ACTN2	CMD1AA|CMH23	actinin alpha 2	20.9754	0.0542362	0.137726
GO:0032224	positive regulation of synaptic transmission, cholinergic	LAMA2	LAMM	laminin subunit alpha 2	20.9754	0.0542362	0.137726
GO:0051150	regulation of smooth muscle cell differentiation	MYOCD	MYCD	myocardin	20.9754	0.0542362	0.137726
GO:0071286	cellular response to magnesium ion	RYR3	RYR-3	ryanodine receptor 3	20.9754	0.0542362	0.137726
GO:0043615	astrocyte cell migration	APCDD1	B7323|DRAPC1|FP7019|HHS|HTS|HYPT1	adenomatosis polyposis coli down-regulated 1	20.9754	0.0542362	0.137726
GO:0003158	endothelium development	CD34	-	CD34 molecule	20.9754	0.0542362	0.137726
GO:0071712	ER-associated misfolded protein catabolic process	VCP	ALS14|CMT2Y|HEL-220|HEL-S-70|IBMPFD|IBMPFD1|TERA|p97	valosin containing protein	20.9754	0.0542362	0.137726
GO:0009812	flavonoid metabolic process	CYP1A1	AHH|AHRR|CP11|CYP1|CYPIA1|P1-450|P450-C|P450DX	cytochrome P450 family 1 subfamily A member 1	20.9754	0.0542362	0.137726
GO:2000427	positive regulation of apoptotic cell clearance	C4B	C4B1|C4B12|C4B2|C4B3|C4B5|C4BD|C4B_2|C4F|CH|CO4|CPAMD3	complement component 4B (Chido blood group)	20.9754	0.0542362	0.137726
GO:1903715	regulation of aerobic respiration	VCP	ALS14|CMT2Y|HEL-220|HEL-S-70|IBMPFD|IBMPFD1|TERA|p97	valosin containing protein	20.9754	0.0542362	0.137726
GO:0043031	negative regulation of macrophage activation	IL31RA	CRL|CRL3|GLM-R|GLMR|GPL|IL-31RA|PLCA2|PRO21384|hGLM-R	interleukin 31 receptor A	20.9754	0.0542362	0.137726
GO:0061037	negative regulation of cartilage development	TGFB2	LDS4|TGF-beta2	transforming growth factor beta 2	20.9754	0.0542362	0.137726
GO:0010887	negative regulation of cholesterol storage	ABCG1	ABC8|WHITE1	ATP binding cassette subfamily G member 1	20.9754	0.0542362	0.137726
GO:0051045	negative regulation of membrane protein ectodomain proteolysis	TIMP4	-	TIMP metallopeptidase inhibitor 4	20.9754	0.0542362	0.137726
GO:1901385	regulation of voltage-gated calcium channel activity	CACNB2	CACNLB2|CAVB2|MYSB	calcium voltage-gated channel auxiliary subunit beta 2	20.9754	0.0542362	0.137726
GO:0055013	cardiac muscle cell development	ACTN2	CMD1AA|CMH23	actinin alpha 2	20.9754	0.0542362	0.137726
GO:0097070	ductus arteriosus closure	MYOCD	MYCD	myocardin	20.9754	0.0542362	0.137726
GO:0035065	regulation of histone acetylation	MYOCD	MYCD	myocardin	20.9754	0.0542362	0.137726
GO:0098792	xenophagy	ASB2	ASB-2	ankyrin repeat and SOCS box containing 2	3.59578	0.0557676	0.140773
GO:0098792	xenophagy	CD163L1	CD163B|M160	CD163 molecule like 1	3.59578	0.0557676	0.140773
GO:0098792	xenophagy	MYOM1	SKELEMIN	myomesin 1	3.59578	0.0557676	0.140773
GO:0007193	adenylate cyclase-inhibiting G-protein coupled receptor signaling pathway	NPY1R	NPY1-R|NPYR	neuropeptide Y receptor Y1	5.47184	0.0560674	0.140971
GO:0007193	adenylate cyclase-inhibiting G-protein coupled receptor signaling pathway	S1PR3	EDG-3|EDG3|LPB3|S1P3	sphingosine-1-phosphate receptor 3	5.47184	0.0560674	0.140971
GO:0007267	cell-cell signaling	WISP2	CCN5|CT58|CTGF-L	WNT1 inducible signaling pathway protein 2	2.49707	0.0567886	0.142083
GO:0007267	cell-cell signaling	ADRA2C	ADRA2L2|ADRA2RL2|ADRARL2|ALPHA2CAR	adrenoceptor alpha 2C	2.49707	0.0567886	0.142083
GO:0007267	cell-cell signaling	ADRA1D	ADRA1|ADRA1A|ADRA1R|ALPHA1|DAR|dJ779E11.2	adrenoceptor alpha 1D	2.49707	0.0567886	0.142083
GO:0007267	cell-cell signaling	CARTPT	CART	CART prepropeptide	2.49707	0.0567886	0.142083
GO:0007267	cell-cell signaling	TGFB2	LDS4|TGF-beta2	transforming growth factor beta 2	2.49707	0.0567886	0.142083
GO:0060048	cardiac muscle contraction	ACTC1	ACTC|ASD5|CMD1R|CMH11|LVNC4	actin, alpha, cardiac muscle 1	5.35542	0.0581504	0.14507
GO:0060048	cardiac muscle contraction	ATP1A2	FHM2|MHP2	ATPase Na+/K+ transporting subunit alpha 2	5.35542	0.0581504	0.14507
GO:0045766	positive regulation of angiogenesis	RHOB	ARH6|ARHB|MST081|MSTP081|RHOH6	ras homolog family member B	3.52857	0.0582758	0.14507
GO:0045766	positive regulation of angiogenesis	CD34	-	CD34 molecule	3.52857	0.0582758	0.14507
GO:0045766	positive regulation of angiogenesis	HSPB1	CMT2F|HEL-S-102|HMN2B|HS.76067|HSP27|HSP28|Hsp25|SRP27	heat shock protein family B (small) member 1	3.52857	0.0582758	0.14507
GO:0006956	complement activation	C4B	C4B1|C4B12|C4B2|C4B3|C4B5|C4BD|C4B_2|C4F|CH|CO4|CPAMD3	complement component 4B (Chido blood group)	5.24385	0.0602597	0.145735
GO:0006956	complement activation	CFD	ADIPSIN|ADN|DF|PFD	complement factor D (adipsin)	5.24385	0.0602597	0.145735
GO:0032963	collagen metabolic process	TNXB	EDS3|HXBL|TENX|TN-X|TNX|TNXB1|TNXB2|TNXBS|VUR8|XB|XBS	tenascin XB	17.9789	0.0617386	0.145735
GO:0060907	positive regulation of macrophage cytokine production	GPRC5B	RAIG-2|RAIG2	G protein-coupled receptor class C group 5 member B	17.9789	0.0617386	0.145735
GO:0090091	positive regulation of extracellular matrix disassembly	TGFB2	LDS4|TGF-beta2	transforming growth factor beta 2	17.9789	0.0617386	0.145735
GO:0006927	transformed cell apoptotic process	RHOB	ARH6|ARHB|MST081|MSTP081|RHOH6	ras homolog family member B	17.9789	0.0617386	0.145735
GO:2000121	regulation of removal of superoxide radicals	FBLN5	ADCL2|ARCL1A|ARMD3|DANCE|EVEC|FIBL-5|HNARMD|UP50	fibulin 5	17.9789	0.0617386	0.145735
GO:0060059	embryonic retina morphogenesis in camera-type eye	RBP4	MCOPCB10|RDCCAS	retinol binding protein 4	17.9789	0.0617386	0.145735
GO:0045162	clustering of voltage-gated sodium channels	MYOC	GLC1A|GPOA|JOAG|JOAG1|TIGR	myocilin	17.9789	0.0617386	0.145735
GO:0043931	ossification involved in bone maturation	DCHS1	CDH19|CDH25|CDHR6|FIB1|MVP2|PCDH16|VMLDS1	dachsous cadherin-related 1	17.9789	0.0617386	0.145735
GO:0051971	positive regulation of transmission of nerve impulse	CARTPT	CART	CART prepropeptide	17.9789	0.0617386	0.145735
GO:0048644	muscle organ morphogenesis	ARID5B	DESRT|MRF-2|MRF2	AT-rich interaction domain 5B	17.9789	0.0617386	0.145735
GO:0040011	locomotion	ATP1A2	FHM2|MHP2	ATPase Na+/K+ transporting subunit alpha 2	17.9789	0.0617386	0.145735
GO:0050891	multicellular organismal water homeostasis	SCNN1B	BESC1|ENaCb|ENaCbeta|SCNEB	sodium channel epithelial 1 beta subunit	17.9789	0.0617386	0.145735
GO:0015872	dopamine transport	SLC22A3	EMT|EMTH|OCT3	solute carrier family 22 member 3	17.9789	0.0617386	0.145735
GO:0045822	negative regulation of heart contraction	ATP1A2	FHM2|MHP2	ATPase Na+/K+ transporting subunit alpha 2	17.9789	0.0617386	0.145735
GO:0072089	stem cell proliferation	CD34	-	CD34 molecule	17.9789	0.0617386	0.145735
GO:0002377	immunoglobulin production	VPREB3	8HS20|N27C7-2	pre-B lymphocyte 3	17.9789	0.0617386	0.145735
GO:0051782	negative regulation of cell division	TXNIP	EST01027|HHCPA78|THIF|VDUP1	thioredoxin interacting protein	17.9789	0.0617386	0.145735
GO:0007197	adenylate cyclase-inhibiting G-protein coupled acetylcholine receptor signaling pathway	CHRM4	HM4|M4R	cholinergic receptor muscarinic 4	17.9789	0.0617386	0.145735
GO:0019388	galactose catabolic process	PGM5	PGMRP	phosphoglucomutase 5	17.9789	0.0617386	0.145735
GO:0048841	regulation of axon extension involved in axon guidance	PLXNA4	FAYV2820|PLEXA4|PLXNA4A|PLXNA4B|PRO34003	plexin A4	17.9789	0.0617386	0.145735
GO:2000727	positive regulation of cardiac muscle cell differentiation	MYOCD	MYCD	myocardin	17.9789	0.0617386	0.145735
GO:0048699	generation of neurons	TGFB2	LDS4|TGF-beta2	transforming growth factor beta 2	17.9789	0.0617386	0.145735
GO:0002438	acute inflammatory response to antigenic stimulus	IL31RA	CRL|CRL3|GLM-R|GLMR|GPL|IL-31RA|PLCA2|PRO21384|hGLM-R	interleukin 31 receptor A	17.9789	0.0617386	0.145735
GO:1901017	negative regulation of potassium ion transmembrane transporter activity	ACTN2	CMD1AA|CMH23	actinin alpha 2	17.9789	0.0617386	0.145735
GO:1901018	positive regulation of potassium ion transmembrane transporter activity	ACTN2	CMD1AA|CMH23	actinin alpha 2	17.9789	0.0617386	0.145735
GO:0007435	salivary gland morphogenesis	TGFB2	LDS4|TGF-beta2	transforming growth factor beta 2	17.9789	0.0617386	0.145735
GO:0042129	regulation of T cell proliferation	CD209	CDSIGN|CLEC4L|DC-SIGN|DC-SIGN1	CD209 molecule	17.9789	0.0617386	0.145735
GO:0006775	fat-soluble vitamin metabolic process	AKR1C1	2-ALPHA-HSD|20-ALPHA-HSD|C9|DD1|DD1/DD2|DDH|DDH1|H-37|HAKRC|HBAB|MBAB	aldo-keto reductase family 1, member C1	5.13683	0.0623948	0.147012
GO:0006775	fat-soluble vitamin metabolic process	RBP4	MCOPCB10|RDCCAS	retinol binding protein 4	5.13683	0.0623948	0.147012
GO:0006955	immune response	SLPI	ALK1|ALP|BLPI|HUSI|HUSI-I|MPI|WAP4|WFDC4	secretory leukocyte peptidase inhibitor	2.18241	0.0655309	0.153267
GO:0006955	immune response	VPREB3	8HS20|N27C7-2	pre-B lymphocyte 3	2.18241	0.0655309	0.153267
GO:0006955	immune response	TRGV3	TCRGV3|V1S3	T cell receptor gamma variable 3	2.18241	0.0655309	0.153267
GO:0006955	immune response	P2RY14	BPR105|GPR105|P2Y14	purinergic receptor P2Y14	2.18241	0.0655309	0.153267
GO:0006955	immune response	PKHD1L1	PKHDL1	polycystic kidney and hepatic disease 1 (autosomal recessive)-like 1	2.18241	0.0655309	0.153267
GO:0006955	immune response	ENPP1	ARHR2|COLED|M6S1|NPP1|NPPS|PC-1|PCA1|PDNP1	ectonucleotide pyrophosphatase/phosphodiesterase 1	2.18241	0.0655309	0.153267
GO:0045471	response to ethanol	RBP4	MCOPCB10|RDCCAS	retinol binding protein 4	3.3119	0.06746	0.155933
GO:0045471	response to ethanol	CA3	CAIII|Car3	carbonic anhydrase III	3.3119	0.06746	0.155933
GO:0045471	response to ethanol	ACTC1	ACTC|ASD5|CMD1R|CMH11|LVNC4	actin, alpha, cardiac muscle 1	3.3119	0.06746	0.155933
GO:0030097	hemopoiesis	CD34	-	CD34 molecule	4.84047	0.0689494	0.155933
GO:0000902	cell morphogenesis	TGFB2	LDS4|TGF-beta2	transforming growth factor beta 2	4.84047	0.0689494	0.155933
GO:0000902	cell morphogenesis	PDPN	AGGRUS|GP36|GP40|Gp38|HT1A-1|OTS8|PA2.26|T1A|T1A-2|T1A2|TI1A	podoplanin	4.84047	0.0689494	0.155933
GO:0030097	hemopoiesis	TGFB2	LDS4|TGF-beta2	transforming growth factor beta 2	4.84047	0.0689494	0.155933
GO:0030643	cellular phosphate ion homeostasis	ENPP1	ARHR2|COLED|M6S1|NPP1|NPPS|PC-1|PCA1|PDNP1	ectonucleotide pyrophosphatase/phosphodiesterase 1	15.7315	0.0691812	0.155933
GO:0015884	folic acid transport	PDPN	AGGRUS|GP36|GP40|Gp38|HT1A-1|OTS8|PA2.26|T1A|T1A-2|T1A2|TI1A	podoplanin	15.7315	0.0691812	0.155933
GO:0021612	facial nerve structural organization	PLXNA4	FAYV2820|PLEXA4|PLXNA4A|PLXNA4B|PRO34003	plexin A4	15.7315	0.0691812	0.155933
GO:0042987	amyloid precursor protein catabolic process	ABCG1	ABC8|WHITE1	ATP binding cassette subfamily G member 1	15.7315	0.0691812	0.155933
GO:0050665	hydrogen peroxide biosynthetic process	CYP1A1	AHH|AHRR|CP11|CYP1|CYPIA1|P1-450|P450-C|P450DX	cytochrome P450 family 1 subfamily A member 1	15.7315	0.0691812	0.155933
GO:0050650	chondroitin sulfate proteoglycan biosynthetic process	CYTL1	C17|C4orf4	cytokine like 1	15.7315	0.0691812	0.155933
GO:0034214	protein hexamerization	VCP	ALS14|CMT2Y|HEL-220|HEL-S-70|IBMPFD|IBMPFD1|TERA|p97	valosin containing protein	15.7315	0.0691812	0.155933
GO:0007207	phospholipase C-activating G-protein coupled acetylcholine receptor signaling pathway	CHRM4	HM4|M4R	cholinergic receptor muscarinic 4	15.7315	0.0691812	0.155933
GO:0008228	opsonization	C4B	C4B1|C4B12|C4B2|C4B3|C4B5|C4BD|C4B_2|C4F|CH|CO4|CPAMD3	complement component 4B (Chido blood group)	15.7315	0.0691812	0.155933
GO:0032926	negative regulation of activin receptor signaling pathway	FSTL3	FLRG|FSRP	follistatin like 3	15.7315	0.0691812	0.155933
GO:0051013	microtubule severing	TTLL11	C9orf20|bA244O19.1	tubulin tyrosine ligase like11	15.7315	0.0691812	0.155933
GO:0051085	chaperone mediated protein folding requiring cofactor	DNAJB1	HSPF1|Hdj1|Hsp40|RSPH16B|Sis1	DnaJ heat shock protein family (Hsp40) member B1	15.7315	0.0691812	0.155933
GO:0061049	cell growth involved in cardiac muscle cell development	MYOCD	MYCD	myocardin	15.7315	0.0691812	0.155933
GO:0030432	peristalsis	NPY1R	NPY1-R|NPYR	neuropeptide Y receptor Y1	15.7315	0.0691812	0.155933
GO:0032731	positive regulation of interleukin-1 beta production	HSPB1	CMT2F|HEL-S-102|HMN2B|HS.76067|HSP27|HSP28|Hsp25|SRP27	heat shock protein family B (small) member 1	15.7315	0.0691812	0.155933
GO:0006734	NADH metabolic process	VCP	ALS14|CMT2Y|HEL-220|HEL-S-70|IBMPFD|IBMPFD1|TERA|p97	valosin containing protein	15.7315	0.0691812	0.155933
GO:0032811	negative regulation of epinephrine secretion	ADRA2C	ADRA2L2|ADRA2RL2|ADRARL2|ALPHA2CAR	adrenoceptor alpha 2C	15.7315	0.0691812	0.155933
GO:0046903	secretion	FBLN5	ADCL2|ARCL1A|ARMD3|DANCE|EVEC|FIBL-5|HNARMD|UP50	fibulin 5	15.7315	0.0691812	0.155933
GO:0071313	cellular response to caffeine	RYR3	RYR-3	ryanodine receptor 3	15.7315	0.0691812	0.155933
GO:0045719	negative regulation of glycogen biosynthetic process	ENPP1	ARHR2|COLED|M6S1|NPP1|NPPS|PC-1|PCA1|PDNP1	ectonucleotide pyrophosphatase/phosphodiesterase 1	15.7315	0.0691812	0.155933
GO:0071493	cellular response to UV-B	MFAP4	-	microfibrillar associated protein 4	15.7315	0.0691812	0.155933
GO:1903779	regulation of cardiac conduction	RYR3	RYR-3	ryanodine receptor 3	4.57645	0.0757167	0.166325
GO:1903779	regulation of cardiac conduction	ATP1A2	FHM2|MHP2	ATPase Na+/K+ transporting subunit alpha 2	4.57645	0.0757167	0.166325
GO:0034333	adherens junction assembly	PIP5K1C	LCCS3|PIP5K-GAMMA|PIP5K1-gamma|PIP5Kgamma	phosphatidylinositol-4-phosphate 5-kinase, type I, gamma	13.9836	0.0765644	0.166325
GO:0051901	positive regulation of mitochondrial depolarization	MYOC	GLC1A|GPOA|JOAG|JOAG1|TIGR	myocilin	13.9836	0.0765644	0.166325
GO:0097267	omega-hydroxylase P450 pathway	CYP1A1	AHH|AHRR|CP11|CYP1|CYPIA1|P1-450|P450-C|P450DX	cytochrome P450 family 1 subfamily A member 1	13.9836	0.0765644	0.166325
GO:0006942	regulation of striated muscle contraction	ATP1A2	FHM2|MHP2	ATPase Na+/K+ transporting subunit alpha 2	13.9836	0.0765644	0.166325
GO:0021785	branchiomotor neuron axon guidance	PLXNA4	FAYV2820|PLEXA4|PLXNA4A|PLXNA4B|PRO34003	plexin A4	13.9836	0.0765644	0.166325
GO:0018095	protein polyglutamylation	TTLL11	C9orf20|bA244O19.1	tubulin tyrosine ligase like11	13.9836	0.0765644	0.166325
GO:0086012	membrane depolarization during cardiac muscle cell action potential	ATP1A2	FHM2|MHP2	ATPase Na+/K+ transporting subunit alpha 2	13.9836	0.0765644	0.166325
GO:0032099	negative regulation of appetite	CARTPT	CART	CART prepropeptide	13.9836	0.0765644	0.166325
GO:0048103	somatic stem cell division	TGFB2	LDS4|TGF-beta2	transforming growth factor beta 2	13.9836	0.0765644	0.166325
GO:0030299	intestinal cholesterol absorption	AKR1C1	2-ALPHA-HSD|20-ALPHA-HSD|C9|DD1|DD1/DD2|DDH|DDH1|H-37|HAKRC|HBAB|MBAB	aldo-keto reductase family 1, member C1	13.9836	0.0765644	0.166325
GO:0060068	vagina development	RBP4	MCOPCB10|RDCCAS	retinol binding protein 4	13.9836	0.0765644	0.166325
GO:0055091	phospholipid homeostasis	ABCG1	ABC8|WHITE1	ATP binding cassette subfamily G member 1	13.9836	0.0765644	0.166325
GO:0047497	mitochondrion transport along microtubule	MAP1B	FUTSCH|MAP5|PPP1R102	microtubule associated protein 1B	13.9836	0.0765644	0.166325
GO:2001214	positive regulation of vasculogenesis	CD34	-	CD34 molecule	13.9836	0.0765644	0.166325
GO:2000009	negative regulation of protein localization to cell surface	ACTN2	CMD1AA|CMH23	actinin alpha 2	13.9836	0.0765644	0.166325
GO:0097104	postsynaptic membrane assembly	NLGN4Y	-	neuroligin 4, Y-linked	13.9836	0.0765644	0.166325
GO:0009635	response to herbicide	CYP1A1	AHH|AHRR|CP11|CYP1|CYPIA1|P1-450|P450-C|P450DX	cytochrome P450 family 1 subfamily A member 1	13.9836	0.0765644	0.166325
GO:0007184	SMAD protein import into nucleus	TGFB2	LDS4|TGF-beta2	transforming growth factor beta 2	13.9836	0.0765644	0.166325
GO:0021680	cerebellar Purkinje cell layer development	FAIM2	LFG|LFG2|NGP35|NMP35|TMBIM2	Fas apoptotic inhibitory molecule 2	13.9836	0.0765644	0.166325
GO:0007175	negative regulation of epidermal growth factor-activated receptor activity	GPRC5A	GPCR5A|PEIG-1|RAI3|RAIG1|TIG1	G protein-coupled receptor class C group 5 member A	13.9836	0.0765644	0.166325
GO:0090136	epithelial cell-cell adhesion	BVES	HBVES|LGMD2X|POP1|POPDC1	blood vessel epicardial substance	13.9836	0.0765644	0.166325
GO:0060044	negative regulation of cardiac muscle cell proliferation	RBP4	MCOPCB10|RDCCAS	retinol binding protein 4	13.9836	0.0765644	0.166325
GO:0086009	membrane repolarization	ATP1A2	FHM2|MHP2	ATPase Na+/K+ transporting subunit alpha 2	13.9836	0.0765644	0.166325
GO:0006930	substrate-dependent cell migration, cell extension	NTN1	NTN1L	netrin 1	13.9836	0.0765644	0.166325
GO:0042698	ovulation cycle	TIMP4	-	TIMP metallopeptidase inhibitor 4	13.9836	0.0765644	0.166325
GO:0060137	maternal process involved in parturition	CYP1A1	AHH|AHRR|CP11|CYP1|CYPIA1|P1-450|P450-C|P450DX	cytochrome P450 family 1 subfamily A member 1	13.9836	0.0765644	0.166325
GO:0060290	transdifferentiation	CD34	-	CD34 molecule	13.9836	0.0765644	0.166325
GO:0002244	hematopoietic progenitor cell differentiation	BVES	HBVES|LGMD2X|POP1|POPDC1	blood vessel epicardial substance	4.41587	0.0803396	0.172243
GO:0002244	hematopoietic progenitor cell differentiation	FSTL3	FLRG|FSRP	follistatin like 3	4.41587	0.0803396	0.172243
GO:0002230	positive regulation of defense response to virus by host	ASB2	ASB-2	ankyrin repeat and SOCS box containing 2	3.04481	0.0816287	0.174566
GO:0002230	positive regulation of defense response to virus by host	CD163L1	CD163B|M160	CD163 molecule like 1	3.04481	0.0816287	0.174566
GO:0002230	positive regulation of defense response to virus by host	MYOM1	SKELEMIN	myomesin 1	3.04481	0.0816287	0.174566
GO:0097191	extrinsic apoptotic signaling pathway	TNFRSF12A	CD266|FN14|TWEAKR	tumor necrosis factor receptor superfamily member 12A	4.33974	0.0826829	0.176
GO:0097191	extrinsic apoptotic signaling pathway	TGFB2	LDS4|TGF-beta2	transforming growth factor beta 2	4.33974	0.0826829	0.176
GO:0008343	adult feeding behavior	CARTPT	CART	CART prepropeptide	12.5852	0.0838886	0.176
GO:0001921	positive regulation of receptor recycling	BVES	HBVES|LGMD2X|POP1|POPDC1	blood vessel epicardial substance	12.5852	0.0838886	0.176
GO:0035313	wound healing, spreading of epidermal cells	SCNN1B	BESC1|ENaCb|ENaCbeta|SCNEB	sodium channel epithelial 1 beta subunit	12.5852	0.0838886	0.176
GO:0036376	sodium ion export from cell	ATP1A2	FHM2|MHP2	ATPase Na+/K+ transporting subunit alpha 2	12.5852	0.0838886	0.176
GO:0010761	fibroblast migration	ARID5B	DESRT|MRF-2|MRF2	AT-rich interaction domain 5B	12.5852	0.0838886	0.176
GO:0042416	dopamine biosynthetic process	TGFB2	LDS4|TGF-beta2	transforming growth factor beta 2	12.5852	0.0838886	0.176
GO:0050778	positive regulation of immune response	TGFB2	LDS4|TGF-beta2	transforming growth factor beta 2	12.5852	0.0838886	0.176
GO:0010700	negative regulation of norepinephrine secretion	ADRA2C	ADRA2L2|ADRA2RL2|ADRARL2|ALPHA2CAR	adrenoceptor alpha 2C	12.5852	0.0838886	0.176
GO:0042535	positive regulation of tumor necrosis factor biosynthetic process	HSPB1	CMT2F|HEL-S-102|HMN2B|HS.76067|HSP27|HSP28|Hsp25|SRP27	heat shock protein family B (small) member 1	12.5852	0.0838886	0.176
GO:0042359	vitamin D metabolic process	CYP1A1	AHH|AHRR|CP11|CYP1|CYPIA1|P1-450|P450-C|P450DX	cytochrome P450 family 1 subfamily A member 1	12.5852	0.0838886	0.176
GO:0032098	regulation of appetite	SLC22A3	EMT|EMTH|OCT3	solute carrier family 22 member 3	12.5852	0.0838886	0.176
GO:0070365	hepatocyte differentiation	CYP1A1	AHH|AHRR|CP11|CYP1|CYPIA1|P1-450|P450-C|P450DX	cytochrome P450 family 1 subfamily A member 1	12.5852	0.0838886	0.176
GO:0071383	cellular response to steroid hormone stimulus	ATP1A2	FHM2|MHP2	ATPase Na+/K+ transporting subunit alpha 2	12.5852	0.0838886	0.176
GO:0006897	endocytosis	CD209	CDSIGN|CLEC4L|DC-SIGN|DC-SIGN1	CD209 molecule	2.99648	0.0846037	0.176828
GO:0006897	endocytosis	AMPH	AMPH1	amphiphysin	2.99648	0.0846037	0.176828
GO:0006897	endocytosis	CLEC10A	CD301|CLECSF13|CLECSF14|HML|HML2|MGL	C-type lectin domain family 10 member A	2.99648	0.0846037	0.176828
GO:0034599	cellular response to oxidative stress	HSPA1A	HEL-S-103|HSP70-1|HSP70-1A|HSP70.1|HSP70I|HSP72|HSPA1	heat shock protein family A (Hsp70) member 1A	4.26618	0.0850469	0.176828
GO:0051289	protein homotetramerization	ACTN2	CMD1AA|CMH23	actinin alpha 2	4.26618	0.0850469	0.176828
GO:0051289	protein homotetramerization	RYR3	RYR-3	ryanodine receptor 3	4.26618	0.0850469	0.176828
GO:0034599	cellular response to oxidative stress	HSPA1B	HSP70-1B|HSP70-2|HSP70.2	heat shock protein family A (Hsp70) member 1B	4.26618	0.0850469	0.176828
GO:0042632	cholesterol homeostasis	ABCG1	ABC8|WHITE1	ATP binding cassette subfamily G member 1	4.26618	0.0850469	0.176828
GO:0042632	cholesterol homeostasis	AKR1C1	2-ALPHA-HSD|20-ALPHA-HSD|C9|DD1|DD1/DD2|DDH|DDH1|H-37|HAKRC|HBAB|MBAB	aldo-keto reductase family 1, member C1	4.26618	0.0850469	0.176828
GO:0007586	digestion	AKR1C2	AKR1C-pseudo|BABP|DD|DD-2|DD/BABP|DD2|DDH2|HAKRD|HBAB|MCDR2|SRXY8|TDD	aldo-keto reductase family 1, member C2	4.19508	0.087431	0.181004
GO:0007586	digestion	AKR1C1	2-ALPHA-HSD|20-ALPHA-HSD|C9|DD1|DD1/DD2|DDH|DDH1|H-37|HAKRC|HBAB|MBAB	aldo-keto reductase family 1, member C1	4.19508	0.087431	0.181004
GO:0006006	glucose metabolic process	NPY1R	NPY1-R|NPYR	neuropeptide Y receptor Y1	2.94966	0.0876239	0.181004
GO:0006006	glucose metabolic process	PGM5	PGMRP	phosphoglucomutase 5	2.94966	0.0876239	0.181004
GO:0009653	anatomical structure morphogenesis	LYVE1	CRSBP-1|HAR|LYVE-1|XLKD1	lymphatic vessel endothelial hyaluronan receptor 1	2.94966	0.0876239	0.181004
GO:0009653	anatomical structure morphogenesis	S1PR3	EDG-3|EDG3|LPB3|S1P3	sphingosine-1-phosphate receptor 3	2.94966	0.0876239	0.181004
GO:0006006	glucose metabolic process	PYGB	GPBB	phosphorylase, glycogen; brain	2.94966	0.0876239	0.181004
GO:0009653	anatomical structure morphogenesis	FOXG1	BF1|BF2|FHKL3|FKH2|FKHL1|FKHL2|FKHL3|FKHL4|FOXG1A|FOXG1B|FOXG1C|HBF-1|HBF-2|HBF-3|HBF-G2|HBF2|HFK1|HFK2|HFK3|KHL2|QIN	forkhead box G1	2.94966	0.0876239	0.181004
GO:0001523	retinoid metabolic process	AKR1C1	2-ALPHA-HSD|20-ALPHA-HSD|C9|DD1|DD1/DD2|DDH|DDH1|H-37|HAKRC|HBAB|MBAB	aldo-keto reductase family 1, member C1	4.12631	0.0898347	0.183679
GO:0001523	retinoid metabolic process	RBP4	MCOPCB10|RDCCAS	retinol binding protein 4	4.12631	0.0898347	0.183679
GO:0006559	L-phenylalanine catabolic process	HPD	4-HPPD|4HPPD|GLOD3|HPPDASE|PPD	4-hydroxyphenylpyruvate dioxygenase	11.4411	0.0911543	0.183679
GO:0008347	glial cell migration	TGFB2	LDS4|TGF-beta2	transforming growth factor beta 2	11.4411	0.0911543	0.183679
GO:0042738	exogenous drug catabolic process	CYP4B1	CYPIVB1|P-450HP	cytochrome P450 family 4 subfamily B member 1	11.4411	0.0911543	0.183679
GO:0034374	low-density lipoprotein particle remodeling	ABCG1	ABC8|WHITE1	ATP binding cassette subfamily G member 1	11.4411	0.0911543	0.183679
GO:0050777	negative regulation of immune response	TGFB2	LDS4|TGF-beta2	transforming growth factor beta 2	11.4411	0.0911543	0.183679
GO:0046888	negative regulation of hormone secretion	NPY1R	NPY1-R|NPYR	neuropeptide Y receptor Y1	11.4411	0.0911543	0.183679
GO:0055078	sodium ion homeostasis	SCNN1B	BESC1|ENaCb|ENaCbeta|SCNEB	sodium channel epithelial 1 beta subunit	11.4411	0.0911543	0.183679
GO:0003094	glomerular filtration	CD34	-	CD34 molecule	11.4411	0.0911543	0.183679
GO:0001946	lymphangiogenesis	PDPN	AGGRUS|GP36|GP40|Gp38|HT1A-1|OTS8|PA2.26|T1A|T1A-2|T1A2|TI1A	podoplanin	11.4411	0.0911543	0.183679
GO:1900004	negative regulation of serine-type endopeptidase activity	ANXA8	ANX8|CH17-360D5.2	annexin A8	11.4411	0.0911543	0.183679
GO:0097105	presynaptic membrane assembly	NLGN4Y	-	neuroligin 4, Y-linked	11.4411	0.0911543	0.183679
GO:0051024	positive regulation of immunoglobulin secretion	RBP4	MCOPCB10|RDCCAS	retinol binding protein 4	11.4411	0.0911543	0.183679
GO:0006937	regulation of muscle contraction	HSPB6	HEL55|Hsp20|PPP1R91	heat shock protein family B (small) member 6	11.4411	0.0911543	0.183679
GO:0046325	negative regulation of glucose import	ENPP1	ARHR2|COLED|M6S1|NPP1|NPPS|PC-1|PCA1|PDNP1	ectonucleotide pyrophosphatase/phosphodiesterase 1	11.4411	0.0911543	0.183679
GO:0010955	negative regulation of protein processing	CHAC1	-	ChaC glutathione-specific gamma-glutamylcyclotransferase 1	11.4411	0.0911543	0.183679
GO:0045779	negative regulation of bone resorption	CARTPT	CART	CART prepropeptide	11.4411	0.0911543	0.183679
GO:0042592	homeostatic process	IL31RA	CRL|CRL3|GLM-R|GLMR|GPL|IL-31RA|PLCA2|PRO21384|hGLM-R	interleukin 31 receptor A	11.4411	0.0911543	0.183679
GO:0021702	cerebellar Purkinje cell differentiation	FAIM2	LFG|LFG2|NGP35|NMP35|TMBIM2	Fas apoptotic inhibitory molecule 2	11.4411	0.0911543	0.183679
GO:0045820	negative regulation of glycolytic process	DDIT4	Dig2|REDD-1|REDD1	DNA damage inducible transcript 4	11.4411	0.0911543	0.183679
GO:0033993	response to lipid	ABCG1	ABC8|WHITE1	ATP binding cassette subfamily G member 1	11.4411	0.0911543	0.183679
GO:0014068	positive regulation of phosphatidylinositol 3-kinase signaling	TGFB2	LDS4|TGF-beta2	transforming growth factor beta 2	4.05975	0.0922576	0.185316
GO:0014068	positive regulation of phosphatidylinositol 3-kinase signaling	MYOC	GLC1A|GPOA|JOAG|JOAG1|TIGR	myocilin	4.05975	0.0922576	0.185316
GO:0035413	positive regulation of catenin import into nucleus	BAMBI	NMA	BMP and activin membrane-bound inhibitor	10.4877	0.098362	0.19227
GO:0055119	relaxation of cardiac muscle	ATP1A2	FHM2|MHP2	ATPase Na+/K+ transporting subunit alpha 2	10.4877	0.098362	0.19227
GO:0055003	cardiac myofibril assembly	ACTC1	ACTC|ASD5|CMD1R|CMH11|LVNC4	actin, alpha, cardiac muscle 1	10.4877	0.098362	0.19227
GO:0045778	positive regulation of ossification	TGFB2	LDS4|TGF-beta2	transforming growth factor beta 2	10.4877	0.098362	0.19227
GO:0009650	UV protection	MFAP4	-	microfibrillar associated protein 4	10.4877	0.098362	0.19227
GO:0022409	positive regulation of cell-cell adhesion	FSTL3	FLRG|FSRP	follistatin like 3	10.4877	0.098362	0.19227
GO:0030007	cellular potassium ion homeostasis	ATP1A2	FHM2|MHP2	ATPase Na+/K+ transporting subunit alpha 2	10.4877	0.098362	0.19227
GO:0030277	maintenance of gastrointestinal epithelium	RBP4	MCOPCB10|RDCCAS	retinol binding protein 4	10.4877	0.098362	0.19227
GO:0042574	retinal metabolic process	AKR1C1	2-ALPHA-HSD|20-ALPHA-HSD|C9|DD1|DD1/DD2|DDH|DDH1|H-37|HAKRC|HBAB|MBAB	aldo-keto reductase family 1, member C1	10.4877	0.098362	0.19227
GO:0030517	negative regulation of axon extension	NTN1	NTN1L	netrin 1	10.4877	0.098362	0.19227
GO:0055008	cardiac muscle tissue morphogenesis	ACTC1	ACTC|ASD5|CMD1R|CMH11|LVNC4	actin, alpha, cardiac muscle 1	10.4877	0.098362	0.19227
GO:0001678	cellular glucose homeostasis	CARTPT	CART	CART prepropeptide	10.4877	0.098362	0.19227
GO:0086004	regulation of cardiac muscle cell contraction	ATP1A2	FHM2|MHP2	ATPase Na+/K+ transporting subunit alpha 2	10.4877	0.098362	0.19227
GO:0006069	ethanol oxidation	ALDH1B1	ALDH5|ALDHX	aldehyde dehydrogenase 1 family member B1	10.4877	0.098362	0.19227
GO:0045019	negative regulation of nitric oxide biosynthetic process	CD34	-	CD34 molecule	10.4877	0.098362	0.19227
GO:0051272	positive regulation of cellular component movement	PDPN	AGGRUS|GP36|GP40|Gp38|HT1A-1|OTS8|PA2.26|T1A|T1A-2|T1A2|TI1A	podoplanin	10.4877	0.098362	0.19227
GO:0030195	negative regulation of blood coagulation	CD34	-	CD34 molecule	10.4877	0.098362	0.19227
GO:0071318	cellular response to ATP	RYR3	RYR-3	ryanodine receptor 3	10.4877	0.098362	0.19227
GO:0046889	positive regulation of lipid biosynthetic process	SORBS1	CAP|FLAF2|R85FL|SH3D5|SH3P12|SORB1	sorbin and SH3 domain containing 1	10.4877	0.098362	0.19227
GO:0072488	ammonium transmembrane transport	SLC22A3	EMT|EMTH|OCT3	solute carrier family 22 member 3	10.4877	0.098362	0.19227
GO:1902287	semaphorin-plexin signaling pathway involved in axon guidance	PLXNA4	FAYV2820|PLEXA4|PLXNA4A|PLXNA4B|PRO34003	plexin A4	10.4877	0.098362	0.19227
GO:0045667	regulation of osteoblast differentiation	SMOC1	OAS	SPARC related modular calcium binding 1	10.4877	0.098362	0.19227
GO:0003376	sphingosine-1-phosphate signaling pathway	S1PR3	EDG-3|EDG3|LPB3|S1P3	sphingosine-1-phosphate receptor 3	10.4877	0.098362	0.19227
GO:0032147	activation of protein kinase activity	TGFB2	LDS4|TGF-beta2	transforming growth factor beta 2	3.87238	0.0996371	0.194464
GO:0032147	activation of protein kinase activity	GPRC5B	RAIG-2|RAIG2	G protein-coupled receptor class C group 5 member B	3.87238	0.0996371	0.194464
GO:0045216	cell-cell junction organization	TGFB2	LDS4|TGF-beta2	transforming growth factor beta 2	3.75679	0.104644	0.201303
GO:0045216	cell-cell junction organization	CDH8	Nbla04261	cadherin 8	3.75679	0.104644	0.201303
GO:0071625	vocalization behavior	NLGN4Y	-	neuroligin 4, Y-linked	9.68095	0.105512	0.201303
GO:0006957	complement activation, alternative pathway	CFD	ADIPSIN|ADN|DF|PFD	complement factor D (adipsin)	9.68095	0.105512	0.201303
GO:0010745	negative regulation of macrophage derived foam cell differentiation	ABCG1	ABC8|WHITE1	ATP binding cassette subfamily G member 1	9.68095	0.105512	0.201303
GO:0046685	response to arsenic-containing substance	CYP1A1	AHH|AHRR|CP11|CYP1|CYPIA1|P1-450|P450-C|P450DX	cytochrome P450 family 1 subfamily A member 1	9.68095	0.105512	0.201303
GO:0048747	muscle fiber development	FLNC	ABP-280|ABP280A|ABPA|ABPL|FLN2|MFM5|MPD4	filamin C	9.68095	0.105512	0.201303
GO:0051145	smooth muscle cell differentiation	MYOCD	MYCD	myocardin	9.68095	0.105512	0.201303
GO:0060389	pathway-restricted SMAD protein phosphorylation	TGFB2	LDS4|TGF-beta2	transforming growth factor beta 2	9.68095	0.105512	0.201303
GO:0071425	hematopoietic stem cell proliferation	CD34	-	CD34 molecule	9.68095	0.105512	0.201303
GO:0060038	cardiac muscle cell proliferation	TGFB2	LDS4|TGF-beta2	transforming growth factor beta 2	9.68095	0.105512	0.201303
GO:0010667	negative regulation of cardiac muscle cell apoptotic process	MYOCD	MYCD	myocardin	9.68095	0.105512	0.201303
GO:0086064	cell communication by electrical coupling involved in cardiac conduction	ATP1A2	FHM2|MHP2	ATPase Na+/K+ transporting subunit alpha 2	9.68095	0.105512	0.201303
GO:0043268	positive regulation of potassium ion transport	ACTN2	CMD1AA|CMH23	actinin alpha 2	9.68095	0.105512	0.201303
GO:0045995	regulation of embryonic development	LAMA2	LAMM	laminin subunit alpha 2	9.68095	0.105512	0.201303
GO:0002087	regulation of respiratory gaseous exchange by neurological system process	ATP1A2	FHM2|MHP2	ATPase Na+/K+ transporting subunit alpha 2	9.68095	0.105512	0.201303
GO:0010248	establishment or maintenance of transmembrane electrochemical gradient	ATP1A2	FHM2|MHP2	ATPase Na+/K+ transporting subunit alpha 2	9.68095	0.105512	0.201303
GO:0033630	positive regulation of cell adhesion mediated by integrin	TGFB2	LDS4|TGF-beta2	transforming growth factor beta 2	9.68095	0.105512	0.201303
GO:0060317	cardiac epithelial to mesenchymal transition	TGFB2	LDS4|TGF-beta2	transforming growth factor beta 2	9.68095	0.105512	0.201303
GO:0043267	negative regulation of potassium ion transport	ACTN2	CMD1AA|CMH23	actinin alpha 2	9.68095	0.105512	0.201303
GO:0007596	blood coagulation	TGFB2	LDS4|TGF-beta2	transforming growth factor beta 2	1.79789	0.106789	0.202676
GO:0007596	blood coagulation	ADRA2C	ADRA2L2|ADRA2RL2|ADRARL2|ALPHA2CAR	adrenoceptor alpha 2C	1.79789	0.106789	0.202676
GO:0007596	blood coagulation	ANXA8	ANX8|CH17-360D5.2	annexin A8	1.79789	0.106789	0.202676
GO:0007596	blood coagulation	PDPN	AGGRUS|GP36|GP40|Gp38|HT1A-1|OTS8|PA2.26|T1A|T1A-2|T1A2|TI1A	podoplanin	1.79789	0.106789	0.202676
GO:0007596	blood coagulation	ACTN2	CMD1AA|CMH23	actinin alpha 2	1.79789	0.106789	0.202676
GO:0007596	blood coagulation	RHOB	ARH6|ARHB|MST081|MSTP081|RHOH6	ras homolog family member B	1.79789	0.106789	0.202676
GO:0007596	blood coagulation	CFD	ADIPSIN|ADN|DF|PFD	complement factor D (adipsin)	1.79789	0.106789	0.202676
GO:0060347	heart trabecula formation	RBP4	MCOPCB10|RDCCAS	retinol binding protein 4	8.98945	0.112605	0.210577
GO:2000273	positive regulation of receptor activity	ACTN2	CMD1AA|CMH23	actinin alpha 2	8.98945	0.112605	0.210577
GO:0060047	heart contraction	ACTC1	ACTC|ASD5|CMD1R|CMH11|LVNC4	actin, alpha, cardiac muscle 1	8.98945	0.112605	0.210577
GO:0048738	cardiac muscle tissue development	RBP4	MCOPCB10|RDCCAS	retinol binding protein 4	8.98945	0.112605	0.210577
GO:0043122	regulation of I-kappaB kinase/NF-kappaB signaling	HSPB1	CMT2F|HEL-S-102|HMN2B|HS.76067|HSP27|HSP28|Hsp25|SRP27	heat shock protein family B (small) member 1	8.98945	0.112605	0.210577
GO:0043149	stress fiber assembly	SORBS1	CAP|FLAF2|R85FL|SH3D5|SH3P12|SORB1	sorbin and SH3 domain containing 1	8.98945	0.112605	0.210577
GO:0035589	G-protein coupled purinergic nucleotide receptor signaling pathway	P2RY14	BPR105|GPR105|P2Y14	purinergic receptor P2Y14	8.98945	0.112605	0.210577
GO:0033700	phospholipid efflux	ABCG1	ABC8|WHITE1	ATP binding cassette subfamily G member 1	8.98945	0.112605	0.210577
GO:1902176	negative regulation of oxidative stress-induced intrinsic apoptotic signaling pathway	HSPB1	CMT2F|HEL-S-102|HMN2B|HS.76067|HSP27|HSP28|Hsp25|SRP27	heat shock protein family B (small) member 1	8.98945	0.112605	0.210577
GO:0010875	positive regulation of cholesterol efflux	ABCG1	ABC8|WHITE1	ATP binding cassette subfamily G member 1	8.98945	0.112605	0.210577
GO:2001241	positive regulation of extrinsic apoptotic signaling pathway in absence of ligand	TGFB2	LDS4|TGF-beta2	transforming growth factor beta 2	8.98945	0.112605	0.210577
GO:0035024	negative regulation of Rho protein signal transduction	MYOC	GLC1A|GPOA|JOAG|JOAG1|TIGR	myocilin	8.98945	0.112605	0.210577
GO:2000147	positive regulation of cell motility	NTN1	NTN1L	netrin 1	8.98945	0.112605	0.210577
GO:0042391	regulation of membrane potential	BVES	HBVES|LGMD2X|POP1|POPDC1	blood vessel epicardial substance	3.54514	0.114854	0.213977
GO:0042060	wound healing	TGFB2	LDS4|TGF-beta2	transforming growth factor beta 2	3.54514	0.114854	0.213977
GO:0042391	regulation of membrane potential	ACTN2	CMD1AA|CMH23	actinin alpha 2	3.54514	0.114854	0.213977
GO:0042060	wound healing	ITGA9	ALPHA-RLC|ITGA4L|RLC	integrin subunit alpha 9	3.54514	0.114854	0.213977
GO:0051966	regulation of synaptic transmission, glutamatergic	ATP1A2	FHM2|MHP2	ATPase Na+/K+ transporting subunit alpha 2	8.39016	0.119642	0.219071
GO:1901379	regulation of potassium ion transmembrane transport	KCNIP3	CSEN|DREAM|KCHIP3	potassium voltage-gated channel interacting protein 3	8.39016	0.119642	0.219071
GO:0001953	negative regulation of cell-matrix adhesion	MYOC	GLC1A|GPOA|JOAG|JOAG1|TIGR	myocilin	8.39016	0.119642	0.219071
GO:2000045	regulation of G1/S transition of mitotic cell cycle	PDPN	AGGRUS|GP36|GP40|Gp38|HT1A-1|OTS8|PA2.26|T1A|T1A-2|T1A2|TI1A	podoplanin	8.39016	0.119642	0.219071
GO:0007213	G-protein coupled acetylcholine receptor signaling pathway	CHRM4	HM4|M4R	cholinergic receptor muscarinic 4	8.39016	0.119642	0.219071
GO:0010801	negative regulation of peptidyl-threonine phosphorylation	DDIT4	Dig2|REDD-1|REDD1	DNA damage inducible transcript 4	8.39016	0.119642	0.219071
GO:0050804	modulation of synaptic transmission	NLGN4Y	-	neuroligin 4, Y-linked	8.39016	0.119642	0.219071
GO:0043162	ubiquitin-dependent protein catabolic process via the multivesicular body sorting pathway	RNF115	BCA2|ZNF364	ring finger protein 115	8.39016	0.119642	0.219071
GO:0048485	sympathetic nervous system development	PLXNA4	FAYV2820|PLEXA4|PLXNA4A|PLXNA4B|PRO34003	plexin A4	8.39016	0.119642	0.219071
GO:0045109	intermediate filament organization	DES	CSM1|CSM2|LGMD2R	desmin	8.39016	0.119642	0.219071
GO:0030214	hyaluronan catabolic process	LYVE1	CRSBP-1|HAR|LYVE-1|XLKD1	lymphatic vessel endothelial hyaluronan receptor 1	8.39016	0.119642	0.219071
GO:0034375	high-density lipoprotein particle remodeling	ABCG1	ABC8|WHITE1	ATP binding cassette subfamily G member 1	8.39016	0.119642	0.219071
GO:0045725	positive regulation of glycogen biosynthetic process	SORBS1	CAP|FLAF2|R85FL|SH3D5|SH3P12|SORB1	sorbin and SH3 domain containing 1	8.39016	0.119642	0.219071
GO:0036503	ERAD pathway	VCP	ALS14|CMT2Y|HEL-220|HEL-S-70|IBMPFD|IBMPFD1|TERA|p97	valosin containing protein	8.39016	0.119642	0.219071
GO:0042493	response to drug	TGFB2	LDS4|TGF-beta2	transforming growth factor beta 2	1.96644	0.120536	0.219289
GO:0042493	response to drug	CYP1A1	AHH|AHRR|CP11|CYP1|CYPIA1|P1-450|P450-C|P450DX	cytochrome P450 family 1 subfamily A member 1	1.96644	0.120536	0.219289
GO:0042493	response to drug	ACTC1	ACTC|ASD5|CMD1R|CMH11|LVNC4	actin, alpha, cardiac muscle 1	1.96644	0.120536	0.219289
GO:0042493	response to drug	TXNIP	EST01027|HHCPA78|THIF|VDUP1	thioredoxin interacting protein	1.96644	0.120536	0.219289
GO:0042493	response to drug	TIMP4	-	TIMP metallopeptidase inhibitor 4	1.96644	0.120536	0.219289
GO:0045666	positive regulation of neuron differentiation	ADRA2C	ADRA2L2|ADRA2RL2|ADRARL2|ALPHA2CAR	adrenoceptor alpha 2C	3.35606	0.125301	0.227633
GO:0045666	positive regulation of neuron differentiation	GPRC5B	RAIG-2|RAIG2	G protein-coupled receptor class C group 5 member B	3.35606	0.125301	0.227633
GO:0032874	positive regulation of stress-activated MAPK cascade	TGFB2	LDS4|TGF-beta2	transforming growth factor beta 2	7.86577	0.126622	0.227759
GO:0048566	embryonic digestive tract development	TGFB2	LDS4|TGF-beta2	transforming growth factor beta 2	7.86577	0.126622	0.227759
GO:0010832	negative regulation of myotube differentiation	MYOCD	MYCD	myocardin	7.86577	0.126622	0.227759
GO:0030970	retrograde protein transport, ER to cytosol	VCP	ALS14|CMT2Y|HEL-220|HEL-S-70|IBMPFD|IBMPFD1|TERA|p97	valosin containing protein	7.86577	0.126622	0.227759
GO:0007158	neuron cell-cell adhesion	NLGN4Y	-	neuroligin 4, Y-linked	7.86577	0.126622	0.227759
GO:2001234	negative regulation of apoptotic signaling pathway	FAIM2	LFG|LFG2|NGP35|NMP35|TMBIM2	Fas apoptotic inhibitory molecule 2	7.86577	0.126622	0.227759
GO:0006750	glutathione biosynthetic process	CHAC1	-	ChaC glutathione-specific gamma-glutamylcyclotransferase 1	7.86577	0.126622	0.227759
GO:0051497	negative regulation of stress fiber assembly	MYOC	GLC1A|GPOA|JOAG|JOAG1|TIGR	myocilin	7.86577	0.126622	0.227759
GO:0042523	positive regulation of tyrosine phosphorylation of Stat5 protein	IL31RA	CRL|CRL3|GLM-R|GLMR|GPL|IL-31RA|PLCA2|PRO21384|hGLM-R	interleukin 31 receptor A	7.86577	0.126622	0.227759
GO:0030224	monocyte differentiation	IL31RA	CRL|CRL3|GLM-R|GLMR|GPL|IL-31RA|PLCA2|PRO21384|hGLM-R	interleukin 31 receptor A	7.86577	0.126622	0.227759
GO:0055093	response to hyperoxia	CYP1A1	AHH|AHRR|CP11|CYP1|CYPIA1|P1-450|P450-C|P450DX	cytochrome P450 family 1 subfamily A member 1	7.86577	0.126622	0.227759
GO:0008585	female gonad development	ARID5B	DESRT|MRF-2|MRF2	AT-rich interaction domain 5B	7.86577	0.126622	0.227759
GO:1900182	positive regulation of protein localization to nucleus	TGFB2	LDS4|TGF-beta2	transforming growth factor beta 2	7.86577	0.126622	0.227759
GO:0034329	cell junction assembly	CDH8	Nbla04261	cadherin 8	3.22698	0.133277	0.236375
GO:0007626	locomotory behavior	NPY1R	NPY1-R|NPYR	neuropeptide Y receptor Y1	3.22698	0.133277	0.236375
GO:0034329	cell junction assembly	FLNC	ABP-280|ABP280A|ABPA|ABPL|FLN2|MFM5|MPD4	filamin C	3.22698	0.133277	0.236375
GO:0006814	sodium ion transport	ATP1A2	FHM2|MHP2	ATPase Na+/K+ transporting subunit alpha 2	3.22698	0.133277	0.236375
GO:0006814	sodium ion transport	SCNN1B	BESC1|ENaCb|ENaCbeta|SCNEB	sodium channel epithelial 1 beta subunit	3.22698	0.133277	0.236375
GO:0007626	locomotory behavior	GPRC5B	RAIG-2|RAIG2	G protein-coupled receptor class C group 5 member B	3.22698	0.133277	0.236375
GO:0030048	actin filament-based movement	ACTC1	ACTC|ASD5|CMD1R|CMH11|LVNC4	actin, alpha, cardiac muscle 1	7.40308	0.133547	0.236375
GO:0048663	neuron fate commitment	TGFB2	LDS4|TGF-beta2	transforming growth factor beta 2	7.40308	0.133547	0.236375
GO:0075733	intracellular transport of virus	CD209	CDSIGN|CLEC4L|DC-SIGN|DC-SIGN1	CD209 molecule	7.40308	0.133547	0.236375
GO:0001894	tissue homeostasis	CD34	-	CD34 molecule	7.40308	0.133547	0.236375
GO:0030500	regulation of bone mineralization	ENPP1	ARHR2|COLED|M6S1|NPP1|NPPS|PC-1|PCA1|PDNP1	ectonucleotide pyrophosphatase/phosphodiesterase 1	7.40308	0.133547	0.236375
GO:0050909	sensory perception of taste	SCNN1B	BESC1|ENaCb|ENaCbeta|SCNEB	sodium channel epithelial 1 beta subunit	7.40308	0.133547	0.236375
GO:0043691	reverse cholesterol transport	ABCG1	ABC8|WHITE1	ATP binding cassette subfamily G member 1	7.40308	0.133547	0.236375
GO:0071901	negative regulation of protein serine/threonine kinase activity	HSPB1	CMT2F|HEL-S-102|HMN2B|HS.76067|HSP27|HSP28|Hsp25|SRP27	heat shock protein family B (small) member 1	7.40308	0.133547	0.236375
GO:0070509	calcium ion import	CACNB2	CACNLB2|CAVB2|MYSB	calcium voltage-gated channel auxiliary subunit beta 2	7.40308	0.133547	0.236375
GO:0032869	cellular response to insulin stimulus	SORBS1	CAP|FLAF2|R85FL|SH3D5|SH3P12|SORB1	sorbin and SH3 domain containing 1	3.14631	0.138656	0.24272
GO:0032869	cellular response to insulin stimulus	ENPP1	ARHR2|COLED|M6S1|NPP1|NPPS|PC-1|PCA1|PDNP1	ectonucleotide pyrophosphatase/phosphodiesterase 1	3.14631	0.138656	0.24272
GO:0001935	endothelial cell proliferation	CD34	-	CD34 molecule	6.9918	0.140416	0.243127
GO:0016079	synaptic vesicle exocytosis	PIP5K1C	LCCS3|PIP5K-GAMMA|PIP5K1-gamma|PIP5Kgamma	phosphatidylinositol-4-phosphate 5-kinase, type I, gamma	6.9918	0.140416	0.243127
GO:1902236	negative regulation of endoplasmic reticulum stress-induced intrinsic apoptotic signaling pathway	HSPA1A	HEL-S-103|HSP70-1|HSP70-1A|HSP70.1|HSP70I|HSP72|HSPA1	heat shock protein family A (Hsp70) member 1A	6.9918	0.140416	0.243127
GO:0030225	macrophage differentiation	IL31RA	CRL|CRL3|GLM-R|GLMR|GPL|IL-31RA|PLCA2|PRO21384|hGLM-R	interleukin 31 receptor A	6.9918	0.140416	0.243127
GO:0043536	positive regulation of blood vessel endothelial cell migration	HSPB1	CMT2F|HEL-S-102|HMN2B|HS.76067|HSP27|HSP28|Hsp25|SRP27	heat shock protein family B (small) member 1	6.9918	0.140416	0.243127
GO:0002026	regulation of the force of heart contraction	ATP1A2	FHM2|MHP2	ATPase Na+/K+ transporting subunit alpha 2	6.9918	0.140416	0.243127
GO:0019373	epoxygenase P450 pathway	CYP1A1	AHH|AHRR|CP11|CYP1|CYPIA1|P1-450|P450-C|P450DX	cytochrome P450 family 1 subfamily A member 1	6.9918	0.140416	0.243127
GO:0006796	phosphate-containing compound metabolic process	ENPP1	ARHR2|COLED|M6S1|NPP1|NPPS|PC-1|PCA1|PDNP1	ectonucleotide pyrophosphatase/phosphodiesterase 1	6.9918	0.140416	0.243127
GO:0045445	myoblast differentiation	ASB2	ASB-2	ankyrin repeat and SOCS box containing 2	6.9918	0.140416	0.243127
GO:0036342	post-anal tail morphogenesis	DCHS1	CDH19|CDH25|CDHR6|FIB1|MVP2|PCDH16|VMLDS1	dachsous cadherin-related 1	6.9918	0.140416	0.243127
GO:0051897	positive regulation of protein kinase B signaling	MYOC	GLC1A|GPOA|JOAG|JOAG1|TIGR	myocilin	3.10747	0.141363	0.244434
GO:0051897	positive regulation of protein kinase B signaling	AKR1C2	AKR1C-pseudo|BABP|DD|DD-2|DD/BABP|DD2|DDH2|HAKRD|HBAB|MCDR2|SRXY8|TDD	aldo-keto reductase family 1, member C2	3.10747	0.141363	0.244434
GO:1900087	positive regulation of G1/S transition of mitotic cell cycle	CYP1A1	AHH|AHRR|CP11|CYP1|CYPIA1|P1-450|P450-C|P450DX	cytochrome P450 family 1 subfamily A member 1	6.62381	0.147231	0.249998
GO:1903506	regulation of nucleic acid-templated transcription	ACTN2	CMD1AA|CMH23	actinin alpha 2	6.62381	0.147231	0.249998
GO:0072583	clathrin-mediated endocytosis	PIP5K1C	LCCS3|PIP5K-GAMMA|PIP5K1-gamma|PIP5Kgamma	phosphatidylinositol-4-phosphate 5-kinase, type I, gamma	6.62381	0.147231	0.249998
GO:0033189	response to vitamin A	CYP1A1	AHH|AHRR|CP11|CYP1|CYPIA1|P1-450|P450-C|P450DX	cytochrome P450 family 1 subfamily A member 1	6.62381	0.147231	0.249998
GO:0070987	error-free translesion synthesis	VCP	ALS14|CMT2Y|HEL-220|HEL-S-70|IBMPFD|IBMPFD1|TERA|p97	valosin containing protein	6.62381	0.147231	0.249998
GO:0006778	porphyrin-containing compound metabolic process	CYP1A1	AHH|AHRR|CP11|CYP1|CYPIA1|P1-450|P450-C|P450DX	cytochrome P450 family 1 subfamily A member 1	6.62381	0.147231	0.249998
GO:0002028	regulation of sodium ion transport	SCNN1B	BESC1|ENaCb|ENaCbeta|SCNEB	sodium channel epithelial 1 beta subunit	6.62381	0.147231	0.249998
GO:0010881	regulation of cardiac muscle contraction by regulation of the release of sequestered calcium ion	ATP1A2	FHM2|MHP2	ATPase Na+/K+ transporting subunit alpha 2	6.62381	0.147231	0.249998
GO:0006883	cellular sodium ion homeostasis	ATP1A2	FHM2|MHP2	ATPase Na+/K+ transporting subunit alpha 2	6.62381	0.147231	0.249998
GO:0032094	response to food	CYP1A1	AHH|AHRR|CP11|CYP1|CYPIA1|P1-450|P450-C|P450DX	cytochrome P450 family 1 subfamily A member 1	6.62381	0.147231	0.249998
GO:0050427	3'-phosphoadenosine 5'-phosphosulfate metabolic process	ENPP1	ARHR2|COLED|M6S1|NPP1|NPPS|PC-1|PCA1|PDNP1	ectonucleotide pyrophosphatase/phosphodiesterase 1	6.62381	0.147231	0.249998
GO:0090102	cochlea development	DCHS1	CDH19|CDH25|CDHR6|FIB1|MVP2|PCDH16|VMLDS1	dachsous cadherin-related 1	6.29262	0.153991	0.25678
GO:0045777	positive regulation of blood pressure	CARTPT	CART	CART prepropeptide	6.29262	0.153991	0.25678
GO:0031334	positive regulation of protein complex assembly	VCP	ALS14|CMT2Y|HEL-220|HEL-S-70|IBMPFD|IBMPFD1|TERA|p97	valosin containing protein	6.29262	0.153991	0.25678
GO:0043523	regulation of neuron apoptotic process	FAIM2	LFG|LFG2|NGP35|NMP35|TMBIM2	Fas apoptotic inhibitory molecule 2	6.29262	0.153991	0.25678
GO:0019229	regulation of vasoconstriction	ATP1A2	FHM2|MHP2	ATPase Na+/K+ transporting subunit alpha 2	6.29262	0.153991	0.25678
GO:0032733	positive regulation of interleukin-10 production	CD34	-	CD34 molecule	6.29262	0.153991	0.25678
GO:0051894	positive regulation of focal adhesion assembly	MYOC	GLC1A|GPOA|JOAG|JOAG1|TIGR	myocilin	6.29262	0.153991	0.25678
GO:1901216	positive regulation of neuron death	DDIT4	Dig2|REDD-1|REDD1	DNA damage inducible transcript 4	6.29262	0.153991	0.25678
GO:0050796	regulation of insulin secretion	ADRA2C	ADRA2L2|ADRA2RL2|ADRARL2|ALPHA2CAR	adrenoceptor alpha 2C	2.9268	0.155056	0.25678
GO:0006767	water-soluble vitamin metabolic process	ENPP1	ARHR2|COLED|M6S1|NPP1|NPPS|PC-1|PCA1|PDNP1	ectonucleotide pyrophosphatase/phosphodiesterase 1	2.9268	0.155056	0.25678
GO:0006928	movement of cell or subcellular component	HSPB1	CMT2F|HEL-S-102|HMN2B|HS.76067|HSP27|HSP28|Hsp25|SRP27	heat shock protein family B (small) member 1	2.9268	0.155056	0.25678
GO:0006767	water-soluble vitamin metabolic process	AOX1	AO|AOH1	aldehyde oxidase 1	2.9268	0.155056	0.25678
GO:0006928	movement of cell or subcellular component	LYVE1	CRSBP-1|HAR|LYVE-1|XLKD1	lymphatic vessel endothelial hyaluronan receptor 1	2.9268	0.155056	0.25678
GO:0050796	regulation of insulin secretion	CARTPT	CART	CART prepropeptide	2.9268	0.155056	0.25678
GO:0008584	male gonad development	FSTL3	FLRG|FSRP	follistatin like 3	2.86028	0.160601	0.262201
GO:0001822	kidney development	FSTL3	FLRG|FSRP	follistatin like 3	2.86028	0.160601	0.262201
GO:0001822	kidney development	ARID5B	DESRT|MRF-2|MRF2	AT-rich interaction domain 5B	2.86028	0.160601	0.262201
GO:0008584	male gonad development	ARID5B	DESRT|MRF-2|MRF2	AT-rich interaction domain 5B	2.86028	0.160601	0.262201
GO:0055007	cardiac muscle cell differentiation	MYOCD	MYCD	myocardin	5.99297	0.160697	0.262201
GO:0001502	cartilage condensation	TGFB2	LDS4|TGF-beta2	transforming growth factor beta 2	5.99297	0.160697	0.262201
GO:0005980	glycogen catabolic process	PYGB	GPBB	phosphorylase, glycogen; brain	5.99297	0.160697	0.262201
GO:0031016	pancreas development	MSLN	MPF|SMRP	mesothelin	5.99297	0.160697	0.262201
GO:0034113	heterotypic cell-cell adhesion	ITGA7	-	integrin subunit alpha 7	5.99297	0.160697	0.262201
GO:0035249	synaptic transmission, glutamatergic	CDH8	Nbla04261	cadherin 8	5.99297	0.160697	0.262201
GO:0035902	response to immobilization stress	CYP1A1	AHH|AHRR|CP11|CYP1|CYPIA1|P1-450|P450-C|P450DX	cytochrome P450 family 1 subfamily A member 1	5.99297	0.160697	0.262201
GO:0007507	heart development	RBP4	MCOPCB10|RDCCAS	retinol binding protein 4	2.1951	0.163883	0.266886
GO:0007507	heart development	BVES	HBVES|LGMD2X|POP1|POPDC1	blood vessel epicardial substance	2.1951	0.163883	0.266886
GO:0007507	heart development	TGFB2	LDS4|TGF-beta2	transforming growth factor beta 2	2.1951	0.163883	0.266886
GO:0032148	activation of protein kinase B activity	ADRA2C	ADRA2L2|ADRA2RL2|ADRARL2|ALPHA2CAR	adrenoceptor alpha 2C	5.72056	0.16735	0.270628
GO:0048278	vesicle docking	BVES	HBVES|LGMD2X|POP1|POPDC1	blood vessel epicardial substance	5.72056	0.16735	0.270628
GO:0034394	protein localization to cell surface	FBLN5	ADCL2|ARCL1A|ARMD3|DANCE|EVEC|FIBL-5|HNARMD|UP50	fibulin 5	5.72056	0.16735	0.270628
GO:0045736	negative regulation of cyclin-dependent protein serine/threonine kinase activity	MYOCD	MYCD	myocardin	5.72056	0.16735	0.270628
GO:0001816	cytokine production	S1PR3	EDG-3|EDG3|LPB3|S1P3	sphingosine-1-phosphate receptor 3	5.72056	0.16735	0.270628
GO:0060173	limb development	SMOC1	OAS	SPARC related modular calcium binding 1	5.72056	0.16735	0.270628
GO:0032496	response to lipopolysaccharide	TIMP4	-	TIMP metallopeptidase inhibitor 4	2.14521	0.17158	0.276242
GO:0032496	response to lipopolysaccharide	CYP1A1	AHH|AHRR|CP11|CYP1|CYPIA1|P1-450|P450-C|P450DX	cytochrome P450 family 1 subfamily A member 1	2.14521	0.17158	0.276242
GO:0032496	response to lipopolysaccharide	SLPI	ALK1|ALP|BLPI|HUSI|HUSI-I|MPI|WAP4|WFDC4	secretory leukocyte peptidase inhibitor	2.14521	0.17158	0.276242
GO:0006954	inflammatory response	S1PR3	EDG-3|EDG3|LPB3|S1P3	sphingosine-1-phosphate receptor 3	1.7335	0.172529	0.276894
GO:0006954	inflammatory response	ACKR1	CCBP1|CD234|DARC|Dfy|FY|GPD|GpFy|WBCQ1	atypical chemokine receptor 1 (Duffy blood group)	1.7335	0.172529	0.276894
GO:0006954	inflammatory response	AOC3	HPAO|SSAO|VAP-1|VAP1	amine oxidase, copper containing 3	1.7335	0.172529	0.276894
GO:0006954	inflammatory response	AOX1	AO|AOH1	aldehyde oxidase 1	1.7335	0.172529	0.276894
GO:0006954	inflammatory response	C4B	C4B1|C4B12|C4B2|C4B3|C4B5|C4BD|C4B_2|C4F|CH|CO4|CPAMD3	complement component 4B (Chido blood group)	1.7335	0.172529	0.276894
GO:0007169	transmembrane receptor protein tyrosine kinase signaling pathway	IL31RA	CRL|CRL3|GLM-R|GLMR|GPL|IL-31RA|PLCA2|PRO21384|hGLM-R	interleukin 31 receptor A	2.7065	0.174611	0.279356
GO:0007169	transmembrane receptor protein tyrosine kinase signaling pathway	GFRA2	GDNFRB|NRTNR-ALPHA|NTNRA|RETL2|TRNR2	GDNF family receptor alpha 2	2.7065	0.174611	0.279356
GO:0030182	neuron differentiation	DDIT4	Dig2|REDD-1|REDD1	DNA damage inducible transcript 4	2.67771	0.177436	0.283519
GO:0030182	neuron differentiation	ITM2C	BRI3|BRICD2C|E25|E25C|ITM3	integral membrane protein 2C	2.67771	0.177436	0.283519
GO:0006469	negative regulation of protein kinase activity	HSPB1	CMT2F|HEL-S-102|HMN2B|HS.76067|HSP27|HSP28|Hsp25|SRP27	heat shock protein family B (small) member 1	2.64952	0.180268	0.286254
GO:0006469	negative regulation of protein kinase activity	PPP1R1A	I1|IPP1	protein phosphatase 1 regulatory inhibitor subunit 1A	2.64952	0.180268	0.286254
GO:0042572	retinol metabolic process	RBP4	MCOPCB10|RDCCAS	retinol binding protein 4	5.24385	0.180496	0.286254
GO:0030511	positive regulation of transforming growth factor beta receptor signaling pathway	MYOCD	MYCD	myocardin	5.24385	0.180496	0.286254
GO:0035924	cellular response to vascular endothelial growth factor stimulus	HSPB1	CMT2F|HEL-S-102|HMN2B|HS.76067|HSP27|HSP28|Hsp25|SRP27	heat shock protein family B (small) member 1	5.24385	0.180496	0.286254
GO:0033137	negative regulation of peptidyl-serine phosphorylation	DDIT4	Dig2|REDD-1|REDD1	DNA damage inducible transcript 4	5.24385	0.180496	0.286254
GO:0031214	biomineral tissue development	ENPP1	ARHR2|COLED|M6S1|NPP1|NPPS|PC-1|PCA1|PDNP1	ectonucleotide pyrophosphatase/phosphodiesterase 1	5.24385	0.180496	0.286254
GO:0048675	axon extension	MAP1B	FUTSCH|MAP5|PPP1R102	microtubule associated protein 1B	5.24385	0.180496	0.286254
GO:0048477	oogenesis	SOHLH1	C9orf157|NOHLH|SPATA27|TEB2|bA100C15.3|bHLHe80	spermatogenesis and oogenesis specific basic helix-loop-helix 1	5.24385	0.180496	0.286254
GO:0055114	oxidation-reduction process	CYP4B1	CYPIVB1|P-450HP	cytochrome P450 family 4 subfamily B member 1	1.53478	0.185425	0.292794
GO:0055114	oxidation-reduction process	AOC3	HPAO|SSAO|VAP-1|VAP1	amine oxidase, copper containing 3	1.53478	0.185425	0.292794
GO:0055114	oxidation-reduction process	AOX1	AO|AOH1	aldehyde oxidase 1	1.53478	0.185425	0.292794
GO:0055114	oxidation-reduction process	AKR1C2	AKR1C-pseudo|BABP|DD|DD-2|DD/BABP|DD2|DDH2|HAKRD|HBAB|MCDR2|SRXY8|TDD	aldo-keto reductase family 1, member C2	1.53478	0.185425	0.292794
GO:0055114	oxidation-reduction process	AKR1C1	2-ALPHA-HSD|20-ALPHA-HSD|C9|DD1|DD1/DD2|DDH|DDH1|H-37|HAKRC|HBAB|MBAB	aldo-keto reductase family 1, member C1	1.53478	0.185425	0.292794
GO:0055114	oxidation-reduction process	CYP1A1	AHH|AHRR|CP11|CYP1|CYPIA1|P1-450|P450-C|P450DX	cytochrome P450 family 1 subfamily A member 1	1.53478	0.185425	0.292794
GO:0055114	oxidation-reduction process	HPD	4-HPPD|4HPPD|GLOD3|HPPDASE|PPD	4-hydroxyphenylpyruvate dioxygenase	1.53478	0.185425	0.292794
GO:0006979	response to oxidative stress	PDLIM1	CLIM1|CLP-36|CLP36|HEL-S-112|hCLIM1	PDZ and LIM domain 1	2.59489	0.185951	0.293261
GO:0006979	response to oxidative stress	CA3	CAIII|Car3	carbonic anhydrase III	2.59489	0.185951	0.293261
GO:0061098	positive regulation of protein tyrosine kinase activity	GPRC5B	RAIG-2|RAIG2	G protein-coupled receptor class C group 5 member B	5.03409	0.186991	0.293629
GO:0045930	negative regulation of mitotic cell cycle	BTG3	ANA|TOB5|TOB55|TOFA	BTG family member 3	5.03409	0.186991	0.293629
GO:0051017	actin filament bundle assembly	NEDD9	CAS-L|CAS2|CASL|CASS2|HEF1	neural precursor cell expressed, developmentally down-regulated 9	5.03409	0.186991	0.293629
GO:0005978	glycogen biosynthetic process	PGM5	PGMRP	phosphoglucomutase 5	5.03409	0.186991	0.293629
GO:0001578	microtubule bundle formation	MAP1B	FUTSCH|MAP5|PPP1R102	microtubule associated protein 1B	5.03409	0.186991	0.293629
GO:0000188	inactivation of MAPK activity	DUSP16	MKP-7|MKP7	dual specificity phosphatase 16	5.03409	0.186991	0.293629
GO:0071364	cellular response to epidermal growth factor stimulus	GAREM1	C18orf11|FAM59A|GAREM|Gm944	GRB2 associated regulator of MAPK1 subtype 1	5.03409	0.186991	0.293629
GO:0007603	phototransduction, visible light	AKR1C1	2-ALPHA-HSD|20-ALPHA-HSD|C9|DD1|DD1/DD2|DDH|DDH1|H-37|HAKRC|HBAB|MBAB	aldo-keto reductase family 1, member C1	2.56842	0.188801	0.296107
GO:0007603	phototransduction, visible light	RBP4	MCOPCB10|RDCCAS	retinol binding protein 4	2.56842	0.188801	0.296107
GO:0007218	neuropeptide signaling pathway	NPY1R	NPY1-R|NPYR	neuropeptide Y receptor Y1	2.54247	0.191658	0.299848
GO:0043488	regulation of mRNA stability	HSPB1	CMT2F|HEL-S-102|HMN2B|HS.76067|HSP27|HSP28|Hsp25|SRP27	heat shock protein family B (small) member 1	2.54247	0.191658	0.299848
GO:0043488	regulation of mRNA stability	HSPA1A	HEL-S-103|HSP70-1|HSP70-1A|HSP70.1|HSP70I|HSP72|HSPA1	heat shock protein family A (Hsp70) member 1A	2.54247	0.191658	0.299848
GO:0007218	neuropeptide signaling pathway	CARTPT	CART	CART prepropeptide	2.54247	0.191658	0.299848
GO:0030449	regulation of complement activation	C4B	C4B1|C4B12|C4B2|C4B3|C4B5|C4BD|C4B_2|C4F|CH|CO4|CPAMD3	complement component 4B (Chido blood group)	4.84047	0.193434	0.301331
GO:0015721	bile acid and bile salt transport	AKR1C1	2-ALPHA-HSD|20-ALPHA-HSD|C9|DD1|DD1/DD2|DDH|DDH1|H-37|HAKRC|HBAB|MBAB	aldo-keto reductase family 1, member C1	4.84047	0.193434	0.301331
GO:0030212	hyaluronan metabolic process	LYVE1	CRSBP-1|HAR|LYVE-1|XLKD1	lymphatic vessel endothelial hyaluronan receptor 1	4.84047	0.193434	0.301331
GO:0005977	glycogen metabolic process	PPP1R1A	I1|IPP1	protein phosphatase 1 regulatory inhibitor subunit 1A	4.84047	0.193434	0.301331
GO:0007159	leukocyte cell-cell adhesion	CD209	CDSIGN|CLEC4L|DC-SIGN|DC-SIGN1	CD209 molecule	4.84047	0.193434	0.301331
GO:0031069	hair follicle morphogenesis	TGFB2	LDS4|TGF-beta2	transforming growth factor beta 2	4.84047	0.193434	0.301331
GO:0040014	regulation of multicellular organism growth	NPY1R	NPY1-R|NPYR	neuropeptide Y receptor Y1	4.84047	0.193434	0.301331
GO:0001764	neuron migration	NTN1	NTN1L	netrin 1	2.49213	0.197387	0.30562
GO:0042593	glucose homeostasis	RBP4	MCOPCB10|RDCCAS	retinol binding protein 4	2.49213	0.197387	0.30562
GO:0042593	glucose homeostasis	GPRC5B	RAIG-2|RAIG2	G protein-coupled receptor class C group 5 member B	2.49213	0.197387	0.30562
GO:0001764	neuron migration	DDIT4	Dig2|REDD-1|REDD1	DNA damage inducible transcript 4	2.49213	0.197387	0.30562
GO:0006259	DNA metabolic process	ADRA1D	ADRA1|ADRA1A|ADRA1R|ALPHA1|DAR|dJ779E11.2	adrenoceptor alpha 1D	4.6612	0.199825	0.306244
GO:0033344	cholesterol efflux	ABCG1	ABC8|WHITE1	ATP binding cassette subfamily G member 1	4.6612	0.199825	0.306244
GO:0032007	negative regulation of TOR signaling	DDIT4	Dig2|REDD-1|REDD1	DNA damage inducible transcript 4	4.6612	0.199825	0.306244
GO:0007528	neuromuscular junction development	CACNB2	CACNLB2|CAVB2|MYSB	calcium voltage-gated channel auxiliary subunit beta 2	4.6612	0.199825	0.306244
GO:0016358	dendrite development	MAP1B	FUTSCH|MAP5|PPP1R102	microtubule associated protein 1B	4.6612	0.199825	0.306244
GO:0043388	positive regulation of DNA binding	MYOCD	MYCD	myocardin	4.6612	0.199825	0.306244
GO:0035329	hippo signaling	DCHS1	CDH19|CDH25|CDHR6|FIB1|MVP2|PCDH16|VMLDS1	dachsous cadherin-related 1	4.6612	0.199825	0.306244
GO:0060612	adipose tissue development	ARID5B	DESRT|MRF-2|MRF2	AT-rich interaction domain 5B	4.6612	0.199825	0.306244
GO:0045746	negative regulation of Notch signaling pathway	CHAC1	-	ChaC glutathione-specific gamma-glutamylcyclotransferase 1	4.6612	0.199825	0.306244
GO:0051928	positive regulation of calcium ion transport	CACNB2	CACNLB2|CAVB2|MYSB	calcium voltage-gated channel auxiliary subunit beta 2	4.6612	0.199825	0.306244
GO:0035987	endodermal cell differentiation	ITGA7	-	integrin subunit alpha 7	4.6612	0.199825	0.306244
GO:0008285	negative regulation of cell proliferation	DPT	TRAMP	dermatopontin	1.62181	0.206033	0.312191
GO:0008285	negative regulation of cell proliferation	BTG3	ANA|TOB5|TOB55|TOFA	BTG family member 3	1.62181	0.206033	0.312191
GO:0008285	negative regulation of cell proliferation	MYOCD	MYCD	myocardin	1.62181	0.206033	0.312191
GO:0008285	negative regulation of cell proliferation	TGFB2	LDS4|TGF-beta2	transforming growth factor beta 2	1.62181	0.206033	0.312191
GO:0008285	negative regulation of cell proliferation	LDOC1	BCUR1|Mar7|Mart7	leucine zipper, down-regulated in cancer 1	1.62181	0.206033	0.312191
GO:0010107	potassium ion import	ATP1A2	FHM2|MHP2	ATPase Na+/K+ transporting subunit alpha 2	4.49473	0.206166	0.312191
GO:0042476	odontogenesis	TGFB2	LDS4|TGF-beta2	transforming growth factor beta 2	4.49473	0.206166	0.312191
GO:1900026	positive regulation of substrate adhesion-dependent cell spreading	MYOC	GLC1A|GPOA|JOAG|JOAG1|TIGR	myocilin	4.49473	0.206166	0.312191
GO:0071479	cellular response to ionizing radiation	RHOB	ARH6|ARHB|MST081|MSTP081|RHOH6	ras homolog family member B	4.33974	0.212456	0.31906
GO:0045765	regulation of angiogenesis	TNFRSF12A	CD266|FN14|TWEAKR	tumor necrosis factor receptor superfamily member 12A	4.33974	0.212456	0.31906
GO:0007032	endosome organization	ANXA8	ANX8|CH17-360D5.2	annexin A8	4.33974	0.212456	0.31906
GO:0046627	negative regulation of insulin receptor signaling pathway	ENPP1	ARHR2|COLED|M6S1|NPP1|NPPS|PC-1|PCA1|PDNP1	ectonucleotide pyrophosphatase/phosphodiesterase 1	4.33974	0.212456	0.31906
GO:0021915	neural tube development	DCHS1	CDH19|CDH25|CDHR6|FIB1|MVP2|PCDH16|VMLDS1	dachsous cadherin-related 1	4.33974	0.212456	0.31906
GO:0051480	regulation of cytosolic calcium ion concentration	CALB2	CAB29|CAL2|CR	calbindin 2	4.33974	0.212456	0.31906
GO:0048706	embryonic skeletal system development	RBP4	MCOPCB10|RDCCAS	retinol binding protein 4	4.33974	0.212456	0.31906
GO:0090004	positive regulation of establishment of protein localization to plasma membrane	SORBS1	CAP|FLAF2|R85FL|SH3D5|SH3P12|SORB1	sorbin and SH3 domain containing 1	4.33974	0.212456	0.31906
GO:0045787	positive regulation of cell cycle	TGFB2	LDS4|TGF-beta2	transforming growth factor beta 2	4.33974	0.212456	0.31906
GO:0006641	triglyceride metabolic process	TNXB	EDS3|HXBL|TENX|TN-X|TNX|TNXB1|TNXB2|TNXBS|VUR8|XB|XBS	tenascin XB	4.33974	0.212456	0.31906
GO:0002931	response to ischemia	FAIM2	LFG|LFG2|NGP35|NMP35|TMBIM2	Fas apoptotic inhibitory molecule 2	4.33974	0.212456	0.31906
GO:0042787	protein ubiquitination involved in ubiquitin-dependent protein catabolic process	ASB2	ASB-2	ankyrin repeat and SOCS box containing 2	2.35238	0.214685	0.322027
GO:0042787	protein ubiquitination involved in ubiquitin-dependent protein catabolic process	RNF115	BCA2|ZNF364	ring finger protein 115	2.35238	0.214685	0.322027
GO:0009615	response to virus	HSPB1	CMT2F|HEL-S-102|HMN2B|HS.76067|HSP27|HSP28|Hsp25|SRP27	heat shock protein family B (small) member 1	2.3306	0.217581	0.325988
GO:0009615	response to virus	CYP1A1	AHH|AHRR|CP11|CYP1|CYPIA1|P1-450|P450-C|P450DX	cytochrome P450 family 1 subfamily A member 1	2.3306	0.217581	0.325988
GO:0006730	one-carbon metabolic process	CA3	CAIII|Car3	carbonic anhydrase III	4.19508	0.218696	0.326314
GO:0048705	skeletal system morphogenesis	ARID5B	DESRT|MRF-2|MRF2	AT-rich interaction domain 5B	4.19508	0.218696	0.326314
GO:0032781	positive regulation of ATPase activity	DNAJB1	HSPF1|Hdj1|Hsp40|RSPH16B|Sis1	DnaJ heat shock protein family (Hsp40) member B1	4.19508	0.218696	0.326314
GO:0042771	intrinsic apoptotic signaling pathway in response to DNA damage by p53 class mediator	DDIT4	Dig2|REDD-1|REDD1	DNA damage inducible transcript 4	4.19508	0.218696	0.326314
GO:0043161	proteasome-mediated ubiquitin-dependent protein catabolic process	RNF115	BCA2|ZNF364	ring finger protein 115	2.30922	0.220481	0.328208
GO:0043161	proteasome-mediated ubiquitin-dependent protein catabolic process	VCP	ALS14|CMT2Y|HEL-220|HEL-S-70|IBMPFD|IBMPFD1|TERA|p97	valosin containing protein	2.30922	0.220481	0.328208
GO:0007010	cytoskeleton organization	NEDD9	CAS-L|CAS2|CASL|CASS2|HEF1	neural precursor cell expressed, developmentally down-regulated 9	2.30922	0.220481	0.328208
GO:0007010	cytoskeleton organization	DES	CSM1|CSM2|LGMD2R	desmin	2.30922	0.220481	0.328208
GO:0044281	small molecule metabolic process	ABCG1	ABC8|WHITE1	ATP binding cassette subfamily G member 1	1.2541	0.223927	0.329945
GO:0044281	small molecule metabolic process	PIP5K1C	LCCS3|PIP5K-GAMMA|PIP5K1-gamma|PIP5Kgamma	phosphatidylinositol-4-phosphate 5-kinase, type I, gamma	1.2541	0.223927	0.329945
GO:0044281	small molecule metabolic process	CYP1A1	AHH|AHRR|CP11|CYP1|CYPIA1|P1-450|P450-C|P450DX	cytochrome P450 family 1 subfamily A member 1	1.2541	0.223927	0.329945
GO:0044281	small molecule metabolic process	HPD	4-HPPD|4HPPD|GLOD3|HPPDASE|PPD	4-hydroxyphenylpyruvate dioxygenase	1.2541	0.223927	0.329945
GO:0044281	small molecule metabolic process	SLC22A3	EMT|EMTH|OCT3	solute carrier family 22 member 3	1.2541	0.223927	0.329945
GO:0044281	small molecule metabolic process	CHAC1	-	ChaC glutathione-specific gamma-glutamylcyclotransferase 1	1.2541	0.223927	0.329945
GO:0044281	small molecule metabolic process	AOC3	HPAO|SSAO|VAP-1|VAP1	amine oxidase, copper containing 3	1.2541	0.223927	0.329945
GO:0044281	small molecule metabolic process	ENPP1	ARHR2|COLED|M6S1|NPP1|NPPS|PC-1|PCA1|PDNP1	ectonucleotide pyrophosphatase/phosphodiesterase 1	1.2541	0.223927	0.329945
GO:0044281	small molecule metabolic process	PYGB	GPBB	phosphorylase, glycogen; brain	1.2541	0.223927	0.329945
GO:0044281	small molecule metabolic process	RBP4	MCOPCB10|RDCCAS	retinol binding protein 4	1.2541	0.223927	0.329945
GO:0044281	small molecule metabolic process	AKR1C1	2-ALPHA-HSD|20-ALPHA-HSD|C9|DD1|DD1/DD2|DDH|DDH1|H-37|HAKRC|HBAB|MBAB	aldo-keto reductase family 1, member C1	1.2541	0.223927	0.329945
GO:0044281	small molecule metabolic process	ADRA2C	ADRA2L2|ADRA2RL2|ADRARL2|ALPHA2CAR	adrenoceptor alpha 2C	1.2541	0.223927	0.329945
GO:0044281	small molecule metabolic process	CA3	CAIII|Car3	carbonic anhydrase III	1.2541	0.223927	0.329945
GO:0044281	small molecule metabolic process	CYP4B1	CYPIVB1|P-450HP	cytochrome P450 family 4 subfamily B member 1	1.2541	0.223927	0.329945
GO:0044281	small molecule metabolic process	LYVE1	CRSBP-1|HAR|LYVE-1|XLKD1	lymphatic vessel endothelial hyaluronan receptor 1	1.2541	0.223927	0.329945
GO:0044281	small molecule metabolic process	ALDH1B1	ALDH5|ALDHX	aldehyde dehydrogenase 1 family member B1	1.2541	0.223927	0.329945
GO:0044281	small molecule metabolic process	AOX1	AO|AOH1	aldehyde oxidase 1	1.2541	0.223927	0.329945
GO:0007259	JAK-STAT cascade	IL31RA	CRL|CRL3|GLM-R|GLMR|GPL|IL-31RA|PLCA2|PRO21384|hGLM-R	interleukin 31 receptor A	4.05975	0.224886	0.329945
GO:0051930	regulation of sensory perception of pain	ADRA2C	ADRA2L2|ADRA2RL2|ADRARL2|ALPHA2CAR	adrenoceptor alpha 2C	4.05975	0.224886	0.329945
GO:0008016	regulation of heart contraction	DES	CSM1|CSM2|LGMD2R	desmin	4.05975	0.224886	0.329945
GO:0003007	heart morphogenesis	TGFB2	LDS4|TGF-beta2	transforming growth factor beta 2	4.05975	0.224886	0.329945
GO:0007268	synaptic transmission	CARTPT	CART	CART prepropeptide	1.55758	0.228484	0.333113
GO:0007268	synaptic transmission	ACTN2	CMD1AA|CMH23	actinin alpha 2	1.55758	0.228484	0.333113
GO:0007268	synaptic transmission	PCDHB4	PCDH-BETA4	protocadherin beta 4	1.55758	0.228484	0.333113
GO:0007268	synaptic transmission	AMPH	AMPH1	amphiphysin	1.55758	0.228484	0.333113
GO:0007268	synaptic transmission	CACNB2	CACNLB2|CAVB2|MYSB	calcium voltage-gated channel auxiliary subunit beta 2	1.55758	0.228484	0.333113
GO:0070059	intrinsic apoptotic signaling pathway in response to endoplasmic reticulum stress	CHAC1	-	ChaC glutathione-specific gamma-glutamylcyclotransferase 1	3.93289	0.231026	0.334522
GO:0071526	semaphorin-plexin signaling pathway	PLXNA4	FAYV2820|PLEXA4|PLXNA4A|PLXNA4B|PRO34003	plexin A4	3.93289	0.231026	0.334522
GO:0015991	ATP hydrolysis coupled proton transport	ATP1A2	FHM2|MHP2	ATPase Na+/K+ transporting subunit alpha 2	3.93289	0.231026	0.334522
GO:0001974	blood vessel remodeling	TGFB2	LDS4|TGF-beta2	transforming growth factor beta 2	3.93289	0.231026	0.334522
GO:0010634	positive regulation of epithelial cell migration	TGFB2	LDS4|TGF-beta2	transforming growth factor beta 2	3.93289	0.231026	0.334522
GO:1901687	glutathione derivative biosynthetic process	CHAC1	-	ChaC glutathione-specific gamma-glutamylcyclotransferase 1	3.93289	0.231026	0.334522
GO:0007166	cell surface receptor signaling pathway	NPY1R	NPY1-R|NPYR	neuropeptide Y receptor Y1	1.65052	0.232723	0.336214
GO:0007166	cell surface receptor signaling pathway	CHRM4	HM4|M4R	cholinergic receptor muscarinic 4	1.65052	0.232723	0.336214
GO:0007166	cell surface receptor signaling pathway	UPK1B	TSPAN20|UPIB|UPK1	uroplakin 1B	1.65052	0.232723	0.336214
GO:0007166	cell surface receptor signaling pathway	TSPAN7	A15|CCG-B7|CD231|DXS1692E|MRX58|MXS1|TALLA-1|TM4SF2|TM4SF2b	tetraspanin 7	1.65052	0.232723	0.336214
GO:0002027	regulation of heart rate	BVES	HBVES|LGMD2X|POP1|POPDC1	blood vessel epicardial substance	3.81371	0.237118	0.342175
GO:0042517	positive regulation of tyrosine phosphorylation of Stat3 protein	IL31RA	CRL|CRL3|GLM-R|GLMR|GPL|IL-31RA|PLCA2|PRO21384|hGLM-R	interleukin 31 receptor A	3.81371	0.237118	0.342175
GO:0007271	synaptic transmission, cholinergic	CHRM4	HM4|M4R	cholinergic receptor muscarinic 4	3.70154	0.243161	0.349707
GO:0017144	drug metabolic process	CYP1A1	AHH|AHRR|CP11|CYP1|CYPIA1|P1-450|P450-C|P450DX	cytochrome P450 family 1 subfamily A member 1	3.70154	0.243161	0.349707
GO:0001837	epithelial to mesenchymal transition	TGFB2	LDS4|TGF-beta2	transforming growth factor beta 2	3.70154	0.243161	0.349707
GO:0006865	amino acid transport	PDPN	AGGRUS|GP36|GP40|Gp38|HT1A-1|OTS8|PA2.26|T1A|T1A-2|T1A2|TI1A	podoplanin	3.70154	0.243161	0.349707
GO:0032355	response to estradiol	NPY1R	NPY1-R|NPYR	neuropeptide Y receptor Y1	2.15132	0.243766	0.350182
GO:0032355	response to estradiol	TXNIP	EST01027|HHCPA78|THIF|VDUP1	thioredoxin interacting protein	2.15132	0.243766	0.350182
GO:0051209	release of sequestered calcium ion into cytosol	RYR3	RYR-3	ryanodine receptor 3	3.59578	0.249156	0.356117
GO:0042059	negative regulation of epidermal growth factor receptor signaling pathway	RNF115	BCA2|ZNF364	ring finger protein 115	3.59578	0.249156	0.356117
GO:0006606	protein import into nucleus	TXNIP	EST01027|HHCPA78|THIF|VDUP1	thioredoxin interacting protein	3.59578	0.249156	0.356117
GO:0048666	neuron development	TGFB2	LDS4|TGF-beta2	transforming growth factor beta 2	3.59578	0.249156	0.356117
GO:0007188	adenylate cyclase-modulating G-protein coupled receptor signaling pathway	ADRA1D	ADRA1|ADRA1A|ADRA1R|ALPHA1|DAR|dJ779E11.2	adrenoceptor alpha 1D	3.59578	0.249156	0.356117
GO:0032720	negative regulation of tumor necrosis factor production	CD34	-	CD34 molecule	3.59578	0.249156	0.356117
GO:0009409	response to cold	CDH8	Nbla04261	cadherin 8	3.59578	0.249156	0.356117
GO:0001525	angiogenesis	RHOB	ARH6|ARHB|MST081|MSTP081|RHOH6	ras homolog family member B	1.73989	0.255054	0.362663
GO:0001525	angiogenesis	TGFB2	LDS4|TGF-beta2	transforming growth factor beta 2	1.73989	0.255054	0.362663
GO:0001525	angiogenesis	TNFRSF12A	CD266|FN14|TWEAKR	tumor necrosis factor receptor superfamily member 12A	1.73989	0.255054	0.362663
GO:0006446	regulation of translational initiation	HSPB1	CMT2F|HEL-S-102|HMN2B|HS.76067|HSP27|HSP28|Hsp25|SRP27	heat shock protein family B (small) member 1	3.4959	0.255103	0.362663
GO:0007631	feeding behavior	NPY1R	NPY1-R|NPYR	neuropeptide Y receptor Y1	3.4959	0.255103	0.362663
GO:0050714	positive regulation of protein secretion	TGFB2	LDS4|TGF-beta2	transforming growth factor beta 2	3.4959	0.255103	0.362663
GO:0010977	negative regulation of neuron projection development	ITM2C	BRI3|BRICD2C|E25|E25C|ITM3	integral membrane protein 2C	3.4959	0.255103	0.362663
GO:0070534	protein K63-linked ubiquitination	RNF115	BCA2|ZNF364	ring finger protein 115	3.4959	0.255103	0.362663
GO:0010629	negative regulation of gene expression	TGFB2	LDS4|TGF-beta2	transforming growth factor beta 2	2.0802	0.255445	0.362663
GO:0070588	calcium ion transmembrane transport	CACNB2	CACNLB2|CAVB2|MYSB	calcium voltage-gated channel auxiliary subunit beta 2	2.0802	0.255445	0.362663
GO:0070588	calcium ion transmembrane transport	RYR3	RYR-3	ryanodine receptor 3	2.0802	0.255445	0.362663
GO:0010629	negative regulation of gene expression	CD34	-	CD34 molecule	2.0802	0.255445	0.362663
GO:0030308	negative regulation of cell growth	TGFB2	LDS4|TGF-beta2	transforming growth factor beta 2	2.06315	0.258366	0.365994
GO:0030036	actin cytoskeleton organization	PIP5K1C	LCCS3|PIP5K-GAMMA|PIP5K1-gamma|PIP5Kgamma	phosphatidylinositol-4-phosphate 5-kinase, type I, gamma	2.06315	0.258366	0.365994
GO:0030308	negative regulation of cell growth	ENPP1	ARHR2|COLED|M6S1|NPP1|NPPS|PC-1|PCA1|PDNP1	ectonucleotide pyrophosphatase/phosphodiesterase 1	2.06315	0.258366	0.365994
GO:0030036	actin cytoskeleton organization	TNXB	EDS3|HXBL|TENX|TN-X|TNX|TNXB1|TNXB2|TNXBS|VUR8|XB|XBS	tenascin XB	2.06315	0.258366	0.365994
GO:0010811	positive regulation of cell-substrate adhesion	VIT	-	vitrin	3.40141	0.261003	0.368289
GO:0007588	excretion	SCNN1B	BESC1|ENaCb|ENaCbeta|SCNEB	sodium channel epithelial 1 beta subunit	3.40141	0.261003	0.368289
GO:0019882	antigen processing and presentation	CD209	CDSIGN|CLEC4L|DC-SIGN|DC-SIGN1	CD209 molecule	3.40141	0.261003	0.368289
GO:0007204	positive regulation of cytosolic calcium ion concentration	S1PR3	EDG-3|EDG3|LPB3|S1P3	sphingosine-1-phosphate receptor 3	2.04638	0.261287	0.368289
GO:0007204	positive regulation of cytosolic calcium ion concentration	ADRA1D	ADRA1|ADRA1A|ADRA1R|ALPHA1|DAR|dJ779E11.2	adrenoceptor alpha 1D	2.04638	0.261287	0.368289
GO:0042157	lipoprotein metabolic process	ABCG1	ABC8|WHITE1	ATP binding cassette subfamily G member 1	3.3119	0.266855	0.373425
GO:0034446	substrate adhesion-dependent cell spreading	BVES	HBVES|LGMD2X|POP1|POPDC1	blood vessel epicardial substance	3.3119	0.266855	0.373425
GO:0002062	chondrocyte differentiation	CYTL1	C17|C4orf4	cytokine like 1	3.3119	0.266855	0.373425
GO:0090002	establishment of protein localization to plasma membrane	ACTN2	CMD1AA|CMH23	actinin alpha 2	3.3119	0.266855	0.373425
GO:0032024	positive regulation of insulin secretion	RBP4	MCOPCB10|RDCCAS	retinol binding protein 4	3.3119	0.266855	0.373425
GO:0009790	embryo development	TGFB2	LDS4|TGF-beta2	transforming growth factor beta 2	3.3119	0.266855	0.373425
GO:0048839	inner ear development	CYTL1	C17|C4orf4	cytokine like 1	3.3119	0.266855	0.373425
GO:0006909	phagocytosis	PIP5K1C	LCCS3|PIP5K-GAMMA|PIP5K1-gamma|PIP5Kgamma	phosphatidylinositol-4-phosphate 5-kinase, type I, gamma	3.3119	0.266855	0.373425
GO:0050821	protein stabilization	HSPA1A	HEL-S-103|HSP70-1|HSP70-1A|HSP70.1|HSP70I|HSP72|HSPA1	heat shock protein family A (Hsp70) member 1A	1.99766	0.270051	0.377094
GO:0050821	protein stabilization	HSPA1B	HSP70-1B|HSP70-2|HSP70.2	heat shock protein family A (Hsp70) member 1B	1.99766	0.270051	0.377094
GO:0070527	platelet aggregation	HSPB1	CMT2F|HEL-S-102|HMN2B|HS.76067|HSP27|HSP28|Hsp25|SRP27	heat shock protein family B (small) member 1	3.22698	0.272662	0.378045
GO:1901215	negative regulation of neuron death	CD34	-	CD34 molecule	3.22698	0.272662	0.378045
GO:0045071	negative regulation of viral genome replication	SLPI	ALK1|ALP|BLPI|HUSI|HUSI-I|MPI|WAP4|WFDC4	secretory leukocyte peptidase inhibitor	3.22698	0.272662	0.378045
GO:0046854	phosphatidylinositol phosphorylation	PIP5K1C	LCCS3|PIP5K-GAMMA|PIP5K1-gamma|PIP5Kgamma	phosphatidylinositol-4-phosphate 5-kinase, type I, gamma	3.22698	0.272662	0.378045
GO:0006833	water transport	PDPN	AGGRUS|GP36|GP40|Gp38|HT1A-1|OTS8|PA2.26|T1A|T1A-2|T1A2|TI1A	podoplanin	3.22698	0.272662	0.378045
GO:0008219	cell death	TGFB2	LDS4|TGF-beta2	transforming growth factor beta 2	3.22698	0.272662	0.378045
GO:0003151	outflow tract morphogenesis	NPY1R	NPY1-R|NPYR	neuropeptide Y receptor Y1	3.22698	0.272662	0.378045
GO:0060348	bone development	MYOC	GLC1A|GPOA|JOAG|JOAG1|TIGR	myocilin	3.22698	0.272662	0.378045
GO:0015701	bicarbonate transport	CA3	CAIII|Car3	carbonic anhydrase III	3.22698	0.272662	0.378045
GO:0045184	establishment of protein localization	VCP	ALS14|CMT2Y|HEL-220|HEL-S-70|IBMPFD|IBMPFD1|TERA|p97	valosin containing protein	3.22698	0.272662	0.378045
GO:0034332	adherens junction organization	CDH8	Nbla04261	cadherin 8	3.22698	0.272662	0.378045
GO:0030514	negative regulation of BMP signaling pathway	FSTL3	FLRG|FSRP	follistatin like 3	3.14631	0.278421	0.383111
GO:0045599	negative regulation of fat cell differentiation	ENPP1	ARHR2|COLED|M6S1|NPP1|NPPS|PC-1|PCA1|PDNP1	ectonucleotide pyrophosphatase/phosphodiesterase 1	3.14631	0.278421	0.383111
GO:0035094	response to nicotine	ATP1A2	FHM2|MHP2	ATPase Na+/K+ transporting subunit alpha 2	3.14631	0.278421	0.383111
GO:0008333	endosome to lysosome transport	RHOB	ARH6|ARHB|MST081|MSTP081|RHOH6	ras homolog family member B	3.14631	0.278421	0.383111
GO:0008206	bile acid metabolic process	AKR1C1	2-ALPHA-HSD|20-ALPHA-HSD|C9|DD1|DD1/DD2|DDH|DDH1|H-37|HAKRC|HBAB|MBAB	aldo-keto reductase family 1, member C1	3.14631	0.278421	0.383111
GO:0030155	regulation of cell adhesion	LAMA2	LAMM	laminin subunit alpha 2	3.06957	0.284135	0.389501
GO:0021549	cerebellum development	FAIM2	LFG|LFG2|NGP35|NMP35|TMBIM2	Fas apoptotic inhibitory molecule 2	3.06957	0.284135	0.389501
GO:0001895	retina homeostasis	HSPB1	CMT2F|HEL-S-102|HMN2B|HS.76067|HSP27|HSP28|Hsp25|SRP27	heat shock protein family B (small) member 1	3.06957	0.284135	0.389501
GO:0051092	positive regulation of NF-kappaB transcription factor activity	HSPA1A	HEL-S-103|HSP70-1|HSP70-1A|HSP70.1|HSP70I|HSP72|HSPA1	heat shock protein family A (Hsp70) member 1A	1.92141	0.284644	0.389779
GO:0051092	positive regulation of NF-kappaB transcription factor activity	HSPA1B	HSP70-1B|HSP70-2|HSP70.2	heat shock protein family A (Hsp70) member 1B	1.92141	0.284644	0.389779
GO:0090263	positive regulation of canonical Wnt signaling pathway	BAMBI	NMA	BMP and activin membrane-bound inhibitor	1.90685	0.28756	0.392926
GO:0090263	positive regulation of canonical Wnt signaling pathway	GPRC5B	RAIG-2|RAIG2	G protein-coupled receptor class C group 5 member B	1.90685	0.28756	0.392926
GO:0051496	positive regulation of stress fiber assembly	MYOC	GLC1A|GPOA|JOAG|JOAG1|TIGR	myocilin	2.99648	0.289803	0.395356
GO:0001658	branching involved in ureteric bud morphogenesis	DCHS1	CDH19|CDH25|CDHR6|FIB1|MVP2|PCDH16|VMLDS1	dachsous cadherin-related 1	2.99648	0.289803	0.395356
GO:0043010	camera-type eye development	CYP1A1	AHH|AHRR|CP11|CYP1|CYPIA1|P1-450|P450-C|P450DX	cytochrome P450 family 1 subfamily A member 1	2.99648	0.289803	0.395356
GO:0007179	transforming growth factor beta receptor signaling pathway	TGFB2	LDS4|TGF-beta2	transforming growth factor beta 2	1.89252	0.290473	0.395846
GO:0007179	transforming growth factor beta receptor signaling pathway	BAMBI	NMA	BMP and activin membrane-bound inhibitor	1.89252	0.290473	0.395846
GO:0045786	negative regulation of cell cycle	RHOB	ARH6|ARHB|MST081|MSTP081|RHOH6	ras homolog family member B	2.9268	0.295426	0.401093
GO:0048468	cell development	ARID5B	DESRT|MRF-2|MRF2	AT-rich interaction domain 5B	2.9268	0.295426	0.401093
GO:0035872	nucleotide-binding domain, leucine rich repeat containing receptor signaling pathway	TXNIP	EST01027|HHCPA78|THIF|VDUP1	thioredoxin interacting protein	2.9268	0.295426	0.401093
GO:0019731	antibacterial humoral response	SLPI	ALK1|ALP|BLPI|HUSI|HUSI-I|MPI|WAP4|WFDC4	secretory leukocyte peptidase inhibitor	2.9268	0.295426	0.401093
GO:0043434	response to peptide hormone	TIMP4	-	TIMP metallopeptidase inhibitor 4	2.9268	0.295426	0.401093
GO:0008015	blood circulation	NPY1R	NPY1-R|NPYR	neuropeptide Y receptor Y1	2.9268	0.295426	0.401093
GO:0034220	ion transmembrane transport	ATP1A2	FHM2|MHP2	ATPase Na+/K+ transporting subunit alpha 2	1.59307	0.297579	0.403371
GO:0034220	ion transmembrane transport	RYR3	RYR-3	ryanodine receptor 3	1.59307	0.297579	0.403371
GO:0034220	ion transmembrane transport	SCNN1B	BESC1|ENaCb|ENaCbeta|SCNEB	sodium channel epithelial 1 beta subunit	1.59307	0.297579	0.403371
GO:0043525	positive regulation of neuron apoptotic process	TGFB2	LDS4|TGF-beta2	transforming growth factor beta 2	2.86028	0.301005	0.406931
GO:0030178	negative regulation of Wnt signaling pathway	APCDD1	B7323|DRAPC1|FP7019|HHS|HTS|HYPT1	adenomatosis polyposis coli down-regulated 1	2.86028	0.301005	0.406931
GO:0010595	positive regulation of endothelial cell migration	RHOB	ARH6|ARHB|MST081|MSTP081|RHOH6	ras homolog family member B	2.86028	0.301005	0.406931
GO:0032956	regulation of actin cytoskeleton organization	TGFB2	LDS4|TGF-beta2	transforming growth factor beta 2	2.86028	0.301005	0.406931
GO:0043408	regulation of MAPK cascade	MYOC	GLC1A|GPOA|JOAG|JOAG1|TIGR	myocilin	2.79672	0.306539	0.41266
GO:0008542	visual learning	ATP1A2	FHM2|MHP2	ATPase Na+/K+ transporting subunit alpha 2	2.79672	0.306539	0.41266
GO:0035176	social behavior	NLGN4Y	-	neuroligin 4, Y-linked	2.73592	0.312028	0.415081
GO:0007187	G-protein coupled receptor signaling pathway, coupled to cyclic nucleotide second messenger	NPY1R	NPY1-R|NPYR	neuropeptide Y receptor Y1	2.73592	0.312028	0.415081
GO:0010506	regulation of autophagy	HSPB1	CMT2F|HEL-S-102|HMN2B|HS.76067|HSP27|HSP28|Hsp25|SRP27	heat shock protein family B (small) member 1	2.73592	0.312028	0.415081
GO:0002250	adaptive immune response	CD209	CDSIGN|CLEC4L|DC-SIGN|DC-SIGN1	CD209 molecule	1.78514	0.313709	0.415081
GO:0002250	adaptive immune response	CLEC10A	CD301|CLECSF13|CLECSF14|HML|HML2|MGL	C-type lectin domain family 10 member A	1.78514	0.313709	0.415081
GO:0006094	gluconeogenesis	RBP4	MCOPCB10|RDCCAS	retinol binding protein 4	2.67771	0.317474	0.417023
GO:0009267	cellular response to starvation	CARTPT	CART	CART prepropeptide	2.67771	0.317474	0.417023
GO:0070936	protein K48-linked ubiquitination	RNF115	BCA2|ZNF364	ring finger protein 115	2.67771	0.317474	0.417023
GO:0032526	response to retinoic acid	RBP4	MCOPCB10|RDCCAS	retinol binding protein 4	2.67771	0.317474	0.417023
GO:0007519	skeletal muscle tissue development	BVES	HBVES|LGMD2X|POP1|POPDC1	blood vessel epicardial substance	2.67771	0.317474	0.417023
GO:0071277	cellular response to calcium ion	RYR3	RYR-3	ryanodine receptor 3	2.62192	0.322877	0.421741
GO:0001541	ovarian follicle development	SOHLH1	C9orf157|NOHLH|SPATA27|TEB2|bA100C15.3|bHLHe80	spermatogenesis and oogenesis specific basic helix-loop-helix 1	2.62192	0.322877	0.421741
GO:0071363	cellular response to growth factor stimulus	MYOCD	MYCD	myocardin	2.62192	0.322877	0.421741
GO:0023014	signal transduction by protein phosphorylation	TGFB2	LDS4|TGF-beta2	transforming growth factor beta 2	2.62192	0.322877	0.421741
GO:0051865	protein autoubiquitination	RNF115	BCA2|ZNF364	ring finger protein 115	2.62192	0.322877	0.421741
GO:0010862	positive regulation of pathway-restricted SMAD protein phosphorylation	TGFB2	LDS4|TGF-beta2	transforming growth factor beta 2	2.62192	0.322877	0.421741
GO:0019048	modulation by virus of host morphology or physiology	CD209	CDSIGN|CLEC4L|DC-SIGN|DC-SIGN1	CD209 molecule	2.62192	0.322877	0.421741
GO:0035914	skeletal muscle cell differentiation	ASB2	ASB-2	ankyrin repeat and SOCS box containing 2	2.62192	0.322877	0.421741
GO:0019985	translesion synthesis	VCP	ALS14|CMT2Y|HEL-220|HEL-S-70|IBMPFD|IBMPFD1|TERA|p97	valosin containing protein	2.62192	0.322877	0.421741
GO:0000209	protein polyubiquitination	RNF115	BCA2|ZNF364	ring finger protein 115	1.724	0.328143	0.426757
GO:0000209	protein polyubiquitination	ASB2	ASB-2	ankyrin repeat and SOCS box containing 2	1.724	0.328143	0.426757
GO:0000910	cytokinesis	RHOB	ARH6|ARHB|MST081|MSTP081|RHOH6	ras homolog family member B	2.56842	0.328236	0.426757
GO:0008344	adult locomotory behavior	ATP1A2	FHM2|MHP2	ATPase Na+/K+ transporting subunit alpha 2	2.56842	0.328236	0.426757
GO:0006357	regulation of transcription from RNA polymerase II promoter	KCNIP3	CSEN|DREAM|KCHIP3	potassium voltage-gated channel interacting protein 3	1.39449	0.329736	0.427833
GO:0006357	regulation of transcription from RNA polymerase II promoter	ARID5A	MRF-1|MRF1|RP11-363D14	AT-rich interaction domain 5A	1.39449	0.329736	0.427833
GO:0006357	regulation of transcription from RNA polymerase II promoter	FOXG1	BF1|BF2|FHKL3|FKH2|FKHL1|FKHL2|FKHL3|FKHL4|FOXG1A|FOXG1B|FOXG1C|HBF-1|HBF-2|HBF-3|HBF-G2|HBF2|HFK1|HFK2|HFK3|KHL2|QIN	forkhead box G1	1.39449	0.329736	0.427833
GO:0006357	regulation of transcription from RNA polymerase II promoter	FSTL3	FLRG|FSRP	follistatin like 3	1.39449	0.329736	0.427833
GO:0042542	response to hydrogen peroxide	TXNIP	EST01027|HHCPA78|THIF|VDUP1	thioredoxin interacting protein	2.46769	0.338828	0.438068
GO:0045727	positive regulation of translation	SAMD4A	SAMD4|SMAUG|SMAUG1|SMG|SMGA	sterile alpha motif domain containing 4A	2.46769	0.338828	0.438068
GO:0040008	regulation of growth	NEDD9	CAS-L|CAS2|CASL|CASS2|HEF1	neural precursor cell expressed, developmentally down-regulated 9	2.42024	0.34406	0.443034
GO:0006091	generation of precursor metabolites and energy	ENPP1	ARHR2|COLED|M6S1|NPP1|NPPS|PC-1|PCA1|PDNP1	ectonucleotide pyrophosphatase/phosphodiesterase 1	2.42024	0.34406	0.443034
GO:0090502	RNA phosphodiester bond hydrolysis, endonucleolytic	RNASE1	RAC1|RIB1|RNS1	ribonuclease A family member 1, pancreatic	2.42024	0.34406	0.443034
GO:0042472	inner ear morphogenesis	NTN1	NTN1L	netrin 1	2.42024	0.34406	0.443034
GO:0001570	vasculogenesis	MYOCD	MYCD	myocardin	2.42024	0.34406	0.443034
GO:0006898	receptor-mediated endocytosis	CD163L1	CD163B|M160	CD163 molecule like 1	1.64513	0.348198	0.447906
GO:0006898	receptor-mediated endocytosis	ENPP1	ARHR2|COLED|M6S1|NPP1|NPPS|PC-1|PCA1|PDNP1	ectonucleotide pyrophosphatase/phosphodiesterase 1	1.64513	0.348198	0.447906
GO:0006631	fatty acid metabolic process	TNXB	EDS3|HXBL|TENX|TN-X|TNX|TNXB1|TNXB2|TNXBS|VUR8|XB|XBS	tenascin XB	2.37457	0.349251	0.447906
GO:0007200	phospholipase C-activating G-protein coupled receptor signaling pathway	ADRA1D	ADRA1|ADRA1A|ADRA1R|ALPHA1|DAR|dJ779E11.2	adrenoceptor alpha 1D	2.37457	0.349251	0.447906
GO:0032091	negative regulation of protein binding	SLPI	ALK1|ALP|BLPI|HUSI|HUSI-I|MPI|WAP4|WFDC4	secretory leukocyte peptidase inhibitor	2.37457	0.349251	0.447906
GO:0007608	sensory perception of smell	OR5V1	6M1-21|hs6M1-21	olfactory receptor family 5 subfamily V member 1	1.63445	0.351046	0.449756
GO:0007608	sensory perception of smell	OR51B6	HOR5'Beta6	olfactory receptor family 51 subfamily B member 6	1.63445	0.351046	0.449756
GO:0034097	response to cytokine	TIMP4	-	TIMP metallopeptidase inhibitor 4	2.3306	0.3544	0.453597
GO:0043087	regulation of GTPase activity	BVES	HBVES|LGMD2X|POP1|POPDC1	blood vessel epicardial substance	2.3306	0.3544	0.453597
GO:0007612	learning	NLGN4Y	-	neuroligin 4, Y-linked	2.28822	0.359509	0.458982
GO:0008202	steroid metabolic process	AKR1C2	AKR1C-pseudo|BABP|DD|DD-2|DD/BABP|DD2|DDH2|HAKRD|HBAB|MCDR2|SRXY8|TDD	aldo-keto reductase family 1, member C2	2.28822	0.359509	0.458982
GO:0050680	negative regulation of epithelial cell proliferation	TGFB2	LDS4|TGF-beta2	transforming growth factor beta 2	2.28822	0.359509	0.458982
GO:0009967	positive regulation of signal transduction	SORBS1	CAP|FLAF2|R85FL|SH3D5|SH3P12|SORB1	sorbin and SH3 domain containing 1	2.28822	0.359509	0.458982
GO:0032092	positive regulation of protein binding	BAMBI	NMA	BMP and activin membrane-bound inhibitor	2.24736	0.364576	0.460669
GO:0016049	cell growth	TGFB2	LDS4|TGF-beta2	transforming growth factor beta 2	2.24736	0.364576	0.460669
GO:0019369	arachidonic acid metabolic process	CYP1A1	AHH|AHRR|CP11|CYP1|CYPIA1|P1-450|P450-C|P450DX	cytochrome P450 family 1 subfamily A member 1	2.24736	0.364576	0.460669
GO:0007266	Rho protein signal transduction	RHOB	ARH6|ARHB|MST081|MSTP081|RHOH6	ras homolog family member B	2.24736	0.364576	0.460669
GO:0017148	negative regulation of translation	SAMD4A	SAMD4|SMAUG|SMAUG1|SMG|SMGA	sterile alpha motif domain containing 4A	2.24736	0.364576	0.460669
GO:0072659	protein localization to plasma membrane	KCNIP3	CSEN|DREAM|KCHIP3	potassium voltage-gated channel interacting protein 3	2.24736	0.364576	0.460669
GO:0060395	SMAD protein signal transduction	TGFB2	LDS4|TGF-beta2	transforming growth factor beta 2	2.24736	0.364576	0.460669
GO:0030433	ER-associated ubiquitin-dependent protein catabolic process	VCP	ALS14|CMT2Y|HEL-220|HEL-S-70|IBMPFD|IBMPFD1|TERA|p97	valosin containing protein	2.20794	0.369604	0.460669
GO:0032922	circadian regulation of gene expression	CARTPT	CART	CART prepropeptide	2.20794	0.369604	0.460669
GO:0006661	phosphatidylinositol biosynthetic process	PIP5K1C	LCCS3|PIP5K-GAMMA|PIP5K1-gamma|PIP5Kgamma	phosphatidylinositol-4-phosphate 5-kinase, type I, gamma	2.20794	0.369604	0.460669
GO:0035556	intracellular signal transduction	PPP1R1A	I1|IPP1	protein phosphatase 1 regulatory inhibitor subunit 1A	1.30417	0.373899	0.460669
GO:0035556	intracellular signal transduction	HSPB1	CMT2F|HEL-S-102|HMN2B|HS.76067|HSP27|HSP28|Hsp25|SRP27	heat shock protein family B (small) member 1	1.30417	0.373899	0.460669
GO:0035556	intracellular signal transduction	ASB2	ASB-2	ankyrin repeat and SOCS box containing 2	1.30417	0.373899	0.460669
GO:0035556	intracellular signal transduction	CD209	CDSIGN|CLEC4L|DC-SIGN|DC-SIGN1	CD209 molecule	1.30417	0.373899	0.460669
GO:0016266	O-glycan processing	MUC16	CA125	mucin 16, cell surface associated	2.16987	0.374591	0.460669
GO:0071407	cellular response to organic cyclic compound	CYP1A1	AHH|AHRR|CP11|CYP1|CYPIA1|P1-450|P450-C|P450DX	cytochrome P450 family 1 subfamily A member 1	2.16987	0.374591	0.460669
GO:0051592	response to calcium ion	TXNIP	EST01027|HHCPA78|THIF|VDUP1	thioredoxin interacting protein	2.16987	0.374591	0.460669
GO:0009612	response to mechanical stimulus	TXNIP	EST01027|HHCPA78|THIF|VDUP1	thioredoxin interacting protein	2.16987	0.374591	0.460669
GO:0019233	sensory perception of pain	NPY1R	NPY1-R|NPYR	neuropeptide Y receptor Y1	2.16987	0.374591	0.460669
GO:0007416	synapse assembly	PCDHB4	PCDH-BETA4	protocadherin beta 4	2.13309	0.379539	0.460669
GO:0070301	cellular response to hydrogen peroxide	RHOB	ARH6|ARHB|MST081|MSTP081|RHOH6	ras homolog family member B	2.13309	0.379539	0.460669
GO:1902600	hydrogen ion transmembrane transport	SLC47A1	MATE1	solute carrier family 47 member 1	2.13309	0.379539	0.460669
GO:0051965	positive regulation of synapse assembly	LRRN1	FIGLER3|NLRR-1	leucine rich repeat neuronal 1	2.09754	0.384447	0.46451
GO:0045732	positive regulation of protein catabolic process	VCP	ALS14|CMT2Y|HEL-220|HEL-S-70|IBMPFD|IBMPFD1|TERA|p97	valosin containing protein	2.09754	0.384447	0.46451
GO:0007568	aging	FOXG1	BF1|BF2|FHKL3|FKH2|FKHL1|FKHL2|FKHL3|FKHL4|FOXG1A|FOXG1B|FOXG1C|HBF-1|HBF-2|HBF-3|HBF-G2|HBF2|HFK1|HFK2|HFK3|KHL2|QIN	forkhead box G1	1.50721	0.38763	0.467468
GO:0007568	aging	CYP1A1	AHH|AHRR|CP11|CYP1|CYPIA1|P1-450|P450-C|P450DX	cytochrome P450 family 1 subfamily A member 1	1.50721	0.38763	0.467468
GO:0006886	intracellular protein transport	RHOB	ARH6|ARHB|MST081|MSTP081|RHOH6	ras homolog family member B	1.50721	0.38763	0.467468
GO:0006886	intracellular protein transport	KCNIP3	CSEN|DREAM|KCHIP3	potassium voltage-gated channel interacting protein 3	1.50721	0.38763	0.467468
GO:0006958	complement activation, classical pathway	C4B	C4B1|C4B12|C4B2|C4B3|C4B5|C4BD|C4B_2|C4F|CH|CO4|CPAMD3	complement component 4B (Chido blood group)	2.06315	0.389316	0.469058
GO:0016197	endosomal transport	ANXA8	ANX8|CH17-360D5.2	annexin A8	2.02988	0.394146	0.474204
GO:0032436	positive regulation of proteasomal ubiquitin-dependent protein catabolic process	VCP	ALS14|CMT2Y|HEL-220|HEL-S-70|IBMPFD|IBMPFD1|TERA|p97	valosin containing protein	2.02988	0.394146	0.474204
GO:0016477	cell migration	BAMBI	NMA	BMP and activin membrane-bound inhibitor	1.48062	0.395941	0.475914
GO:0016477	cell migration	TGFB2	LDS4|TGF-beta2	transforming growth factor beta 2	1.48062	0.395941	0.475914
GO:0008203	cholesterol metabolic process	ABCG1	ABC8|WHITE1	ATP binding cassette subfamily G member 1	1.99766	0.398938	0.478613
GO:0043627	response to estrogen	KRT19	CK19|K19|K1CS	keratin 19	1.99766	0.398938	0.478613
GO:0006486	protein glycosylation	GALNT16	GALNACT16|GALNTL1|GalNAc-T16	polypeptide N-acetylgalactosaminyltransferase 16	1.99766	0.398938	0.478613
GO:0015758	glucose transport	SORBS1	CAP|FLAF2|R85FL|SH3D5|SH3P12|SORB1	sorbin and SH3 domain containing 1	1.96644	0.403692	0.48386
GO:0051260	protein homooligomerization	AKR1C1	2-ALPHA-HSD|20-ALPHA-HSD|C9|DD1|DD1/DD2|DDH|DDH1|H-37|HAKRC|HBAB|MBAB	aldo-keto reductase family 1, member C1	1.45494	0.404199	0.484013
GO:0051260	protein homooligomerization	VCP	ALS14|CMT2Y|HEL-220|HEL-S-70|IBMPFD|IBMPFD1|TERA|p97	valosin containing protein	1.45494	0.404199	0.484013
GO:0055085	transmembrane transport	SLC47A1	MATE1	solute carrier family 47 member 1	1.17436	0.410053	0.488635
GO:0055085	transmembrane transport	ATP1A2	FHM2|MHP2	ATPase Na+/K+ transporting subunit alpha 2	1.17436	0.410053	0.488635
GO:0055085	transmembrane transport	SCNN1B	BESC1|ENaCb|ENaCbeta|SCNEB	sodium channel epithelial 1 beta subunit	1.17436	0.410053	0.488635
GO:0055085	transmembrane transport	SLC22A3	EMT|EMTH|OCT3	solute carrier family 22 member 3	1.17436	0.410053	0.488635
GO:0055085	transmembrane transport	ABCG1	ABC8|WHITE1	ATP binding cassette subfamily G member 1	1.17436	0.410053	0.488635
GO:0055085	transmembrane transport	RYR3	RYR-3	ryanodine receptor 3	1.17436	0.410053	0.488635
GO:0006457	protein folding	DNAJB5	Hsc40	DnaJ heat shock protein family (Hsp40) member B5	1.43014	0.412401	0.489918
GO:0006457	protein folding	BAG2	BAG-2|dJ417I1.2	BCL2 associated athanogene 2	1.43014	0.412401	0.489918
GO:0000723	telomere maintenance	HSPA1A	HEL-S-103|HSP70-1|HSP70-1A|HSP70.1|HSP70I|HSP72|HSPA1	heat shock protein family A (Hsp70) member 1A	1.90685	0.413086	0.490504
GO:0043065	positive regulation of apoptotic process	RHOB	ARH6|ARHB|MST081|MSTP081|RHOH6	ras homolog family member B	1.27553	0.422792	0.500396
GO:0043065	positive regulation of apoptotic process	TXNIP	EST01027|HHCPA78|THIF|VDUP1	thioredoxin interacting protein	1.27553	0.422792	0.500396
GO:0043065	positive regulation of apoptotic process	TNFRSF12A	CD266|FN14|TWEAKR	tumor necrosis factor receptor superfamily member 12A	1.27553	0.422792	0.500396
GO:0050729	positive regulation of inflammatory response	GPRC5B	RAIG-2|RAIG2	G protein-coupled receptor class C group 5 member B	1.82395	0.426899	0.504085
GO:0045444	fat cell differentiation	ARID5B	DESRT|MRF-2|MRF2	AT-rich interaction domain 5B	1.82395	0.426899	0.504085
GO:0009749	response to glucose	TXNIP	EST01027|HHCPA78|THIF|VDUP1	thioredoxin interacting protein	1.82395	0.426899	0.504085
GO:0070098	chemokine-mediated signaling pathway	ACKR1	CCBP1|CD234|DARC|Dfy|FY|GPD|GpFy|WBCQ1	atypical chemokine receptor 1 (Duffy blood group)	1.82395	0.426899	0.504085
GO:0006869	lipid transport	TMEM30B	CDC50B	transmembrane protein 30B	1.79789	0.43143	0.509199
GO:0009791	post-embryonic development	ARID5B	DESRT|MRF-2|MRF2	AT-rich interaction domain 5B	1.77257	0.435925	0.514266
GO:0030512	negative regulation of transforming growth factor beta receptor signaling pathway	BAMBI	NMA	BMP and activin membrane-bound inhibitor	1.74795	0.440384	0.518806
GO:0043086	negative regulation of catalytic activity	TXNIP	EST01027|HHCPA78|THIF|VDUP1	thioredoxin interacting protein	1.724	0.444808	0.523292
GO:0007420	brain development	FOXG1	BF1|BF2|FHKL3|FKH2|FKHL1|FKHL2|FKHL3|FKHL4|FOXG1A|FOXG1B|FOXG1C|HBF-1|HBF-2|HBF-3|HBF-G2|HBF2|HFK1|HFK2|HFK3|KHL2|QIN	forkhead box G1	1.33177	0.447249	0.525678
GO:0007420	brain development	DDIT4	Dig2|REDD-1|REDD1	DNA damage inducible transcript 4	1.33177	0.447249	0.525678
GO:0006816	calcium ion transport	RYR3	RYR-3	ryanodine receptor 3	1.70071	0.449197	0.527724
GO:0035725	sodium ion transmembrane transport	SCNN1B	BESC1|ENaCb|ENaCbeta|SCNEB	sodium channel epithelial 1 beta subunit	1.67803	0.453551	0.532347
GO:0001503	ossification	FSTL3	FLRG|FSRP	follistatin like 3	1.67803	0.453551	0.532347
GO:0035264	multicellular organism growth	ARID5B	DESRT|MRF-2|MRF2	AT-rich interaction domain 5B	1.65595	0.45787	0.535935
GO:0060021	palate development	ARID5B	DESRT|MRF-2|MRF2	AT-rich interaction domain 5B	1.65595	0.45787	0.535935
GO:0030216	keratinocyte differentiation	TXNIP	EST01027|HHCPA78|THIF|VDUP1	thioredoxin interacting protein	1.65595	0.45787	0.535935
GO:0016042	lipid catabolic process	ENPP6	NPP6	ectonucleotide pyrophosphatase/phosphodiesterase 6	1.63445	0.462154	0.540702
GO:0006813	potassium ion transport	ATP1A2	FHM2|MHP2	ATPase Na+/K+ transporting subunit alpha 2	1.59307	0.470622	0.54985
GO:0007601	visual perception	RBP4	MCOPCB10|RDCCAS	retinol binding protein 4	1.26485	0.473232	0.552393
GO:0007601	visual perception	CACNB2	CACNLB2|CAVB2|MYSB	calcium voltage-gated channel auxiliary subunit beta 2	1.26485	0.473232	0.552393
GO:0006919	activation of cysteine-type endopeptidase activity involved in apoptotic process	VCP	ALS14|CMT2Y|HEL-220|HEL-S-70|IBMPFD|IBMPFD1|TERA|p97	valosin containing protein	1.57315	0.474805	0.553469
GO:0030307	positive regulation of cell growth	TGFB2	LDS4|TGF-beta2	transforming growth factor beta 2	1.57315	0.474805	0.553469
GO:0071260	cellular response to mechanical stimulus	ATP1A2	FHM2|MHP2	ATPase Na+/K+ transporting subunit alpha 2	1.57315	0.474805	0.553469
GO:0006493	protein O-linked glycosylation	MUC16	CA125	mucin 16, cell surface associated	1.51629	0.487156	0.567087
GO:0001889	liver development	ARID5B	DESRT|MRF-2|MRF2	AT-rich interaction domain 5B	1.44658	0.503171	0.584661
GO:0090305	nucleic acid phosphodiester bond hydrolysis	ENPP1	ARHR2|COLED|M6S1|NPP1|NPPS|PC-1|PCA1|PDNP1	ectonucleotide pyrophosphatase/phosphodiesterase 1	1.43014	0.507095	0.585481
GO:0030336	negative regulation of cell migration	RHOB	ARH6|ARHB|MST081|MSTP081|RHOH6	ras homolog family member B	1.41407	0.510989	0.588909
GO:0007409	axonogenesis	LRRN1	FIGLER3|NLRR-1	leucine rich repeat neuronal 1	1.41407	0.510989	0.588909
GO:0010976	positive regulation of neuron projection development	GPRC5B	RAIG-2|RAIG2	G protein-coupled receptor class C group 5 member B	1.38299	0.518682	0.596965
GO:0006915	apoptotic process	KCNIP3	CSEN|DREAM|KCHIP3	potassium voltage-gated channel interacting protein 3	1.05052	0.520811	0.598063
GO:0006915	apoptotic process	NTN1	NTN1L	netrin 1	1.05052	0.520811	0.598063
GO:0006915	apoptotic process	ACTC1	ACTC|ASD5|CMD1R|CMH11|LVNC4	actin, alpha, cardiac muscle 1	1.05052	0.520811	0.598063
GO:0006915	apoptotic process	FAIM2	LFG|LFG2|NGP35|NMP35|TMBIM2	Fas apoptotic inhibitory molecule 2	1.05052	0.520811	0.598063
GO:0006915	apoptotic process	RHOB	ARH6|ARHB|MST081|MSTP081|RHOH6	ras homolog family member B	1.05052	0.520811	0.598063
GO:0005975	carbohydrate metabolic process	PYGB	GPBB	phosphorylase, glycogen; brain	1.09121	0.522311	0.598977
GO:0005975	carbohydrate metabolic process	LYVE1	CRSBP-1|HAR|LYVE-1|XLKD1	lymphatic vessel endothelial hyaluronan receptor 1	1.09121	0.522311	0.598977
GO:0005975	carbohydrate metabolic process	ALDH1B1	ALDH5|ALDHX	aldehyde dehydrogenase 1 family member B1	1.09121	0.522311	0.598977
GO:0007565	female pregnancy	ADRA2C	ADRA2L2|ADRA2RL2|ADRARL2|ALPHA2CAR	adrenoceptor alpha 2C	1.33885	0.529995	0.607242
GO:0043066	negative regulation of apoptotic process	FAIM2	LFG|LFG2|NGP35|NMP35|TMBIM2	Fas apoptotic inhibitory molecule 2	1.04442	0.536558	0.613105
GO:0043066	negative regulation of apoptotic process	ACTC1	ACTC|ASD5|CMD1R|CMH11|LVNC4	actin, alpha, cardiac muscle 1	1.04442	0.536558	0.613105
GO:0043066	negative regulation of apoptotic process	HSPB1	CMT2F|HEL-S-102|HMN2B|HS.76067|HSP27|HSP28|Hsp25|SRP27	heat shock protein family B (small) member 1	1.04442	0.536558	0.613105
GO:0043066	negative regulation of apoptotic process	IL31RA	CRL|CRL3|GLM-R|GLMR|GPL|IL-31RA|PLCA2|PRO21384|hGLM-R	interleukin 31 receptor A	1.04442	0.536558	0.613105
GO:0031175	neuron projection development	MYOC	GLC1A|GPOA|JOAG|JOAG1|TIGR	myocilin	1.31096	0.537388	0.613504
GO:0016192	vesicle-mediated transport	BVES	HBVES|LGMD2X|POP1|POPDC1	blood vessel epicardial substance	1.31096	0.537388	0.613504
GO:0000186	activation of MAPKK activity	CARTPT	CART	CART prepropeptide	1.09437	0.548761	0.625366
GO:0000186	activation of MAPKK activity	ACTN2	CMD1AA|CMH23	actinin alpha 2	1.09437	0.548761	0.625366
GO:0035335	peptidyl-tyrosine dephosphorylation	DUSP16	MKP-7|MKP7	dual specificity phosphatase 16	1.25852	0.551824	0.627174
GO:0045893	positive regulation of transcription, DNA-templated	IL31RA	CRL|CRL3|GLM-R|GLMR|GPL|IL-31RA|PLCA2|PRO21384|hGLM-R	interleukin 31 receptor A	1.01699	0.556957	0.631866
GO:0045893	positive regulation of transcription, DNA-templated	MYOCD	MYCD	myocardin	1.01699	0.556957	0.631866
GO:0045893	positive regulation of transcription, DNA-templated	CREB5	CRE-BPA|CREB-5	cAMP responsive element binding protein 5	1.01699	0.556957	0.631866
GO:0045893	positive regulation of transcription, DNA-templated	BAMBI	NMA	BMP and activin membrane-bound inhibitor	1.01699	0.556957	0.631866
GO:0006112	energy reserve metabolic process	ADRA2C	ADRA2L2|ADRA2RL2|ADRARL2|ALPHA2CAR	adrenoceptor alpha 2C	1.23385	0.558872	0.631866
GO:0045087	innate immune response	SLPI	ALK1|ALP|BLPI|HUSI|HUSI-I|MPI|WAP4|WFDC4	secretory leukocyte peptidase inhibitor	0.995442	0.55893	0.631866
GO:0045087	innate immune response	C4B	C4B1|C4B12|C4B2|C4B3|C4B5|C4BD|C4B_2|C4F|CH|CO4|CPAMD3	complement component 4B (Chido blood group)	0.995442	0.55893	0.631866
GO:0045087	innate immune response	CFD	ADIPSIN|ADN|DF|PFD	complement factor D (adipsin)	0.995442	0.55893	0.631866
GO:0045087	innate immune response	ACTN2	CMD1AA|CMH23	actinin alpha 2	0.995442	0.55893	0.631866
GO:0045087	innate immune response	CLEC10A	CD301|CLECSF13|CLECSF14|HML|HML2|MGL	C-type lectin domain family 10 member A	0.995442	0.55893	0.631866
GO:0045087	innate immune response	TXNIP	EST01027|HHCPA78|THIF|VDUP1	thioredoxin interacting protein	0.995442	0.55893	0.631866
GO:0045087	innate immune response	CD209	CDSIGN|CLEC4L|DC-SIGN|DC-SIGN1	CD209 molecule	0.995442	0.55893	0.631866
GO:0030968	endoplasmic reticulum unfolded protein response	VCP	ALS14|CMT2Y|HEL-220|HEL-S-70|IBMPFD|IBMPFD1|TERA|p97	valosin containing protein	1.22187	0.562353	0.635454
GO:0042981	regulation of apoptotic process	ACTN2	CMD1AA|CMH23	actinin alpha 2	1.05316	0.569193	0.642374
GO:0042981	regulation of apoptotic process	VCP	ALS14|CMT2Y|HEL-220|HEL-S-70|IBMPFD|IBMPFD1|TERA|p97	valosin containing protein	1.05316	0.569193	0.642374
GO:0001649	osteoblast differentiation	MYOC	GLC1A|GPOA|JOAG|JOAG1|TIGR	myocilin	1.17619	0.576006	0.649441
GO:0000165	MAPK cascade	IL31RA	CRL|CRL3|GLM-R|GLMR|GPL|IL-31RA|PLCA2|PRO21384|hGLM-R	interleukin 31 receptor A	1.02737	0.582432	0.654217
GO:0000165	MAPK cascade	ACTN2	CMD1AA|CMH23	actinin alpha 2	1.02737	0.582432	0.654217
GO:0008150	biological_process	PDGFRL	PDGRL|PRLTS	platelet derived growth factor receptor like	0.9756	0.584288	0.654217
GO:0008150	biological_process	C6orf15	STG	chromosome 6 open reading frame 15	0.9756	0.584288	0.654217
GO:0008150	biological_process	TIMP4	-	TIMP metallopeptidase inhibitor 4	0.9756	0.584288	0.654217
GO:0008150	biological_process	EPPK1	EPIPL|EPIPL1	epiplakin 1	0.9756	0.584288	0.654217
GO:0008150	biological_process	MYOZ2	C4orf5|CMH16|CS-1	myozenin 2	0.9756	0.584288	0.654217
GO:0007265	Ras protein signal transduction	ACTN2	CMD1AA|CMH23	actinin alpha 2	1.02319	0.584609	0.654217
GO:0007265	Ras protein signal transduction	NTN1	NTN1L	netrin 1	1.02319	0.584609	0.654217
GO:0071805	potassium ion transmembrane transport	KCNIP3	CSEN|DREAM|KCHIP3	potassium voltage-gated channel interacting protein 3	1.14411	0.585963	0.655445
GO:0007417	central nervous system development	TIMP4	-	TIMP metallopeptidase inhibitor 4	1.10397	0.598874	0.669299
GO:0050900	leukocyte migration	CD34	-	CD34 molecule	1.08493	0.605177	0.676046
GO:0030203	glycosaminoglycan metabolic process	LYVE1	CRSBP-1|HAR|LYVE-1|XLKD1	lymphatic vessel endothelial hyaluronan receptor 1	1.06655	0.61138	0.681481
GO:0071456	cellular response to hypoxia	MYOCD	MYCD	myocardin	1.05758	0.614444	0.684598
GO:0022617	extracellular matrix disassembly	TPSAB1	TPS1|TPS2|TPSB1	tryptase alpha/beta 1	1.04877	0.617485	0.687684
GO:0006629	lipid metabolic process	ENPP6	NPP6	ectonucleotide pyrophosphatase/phosphodiesterase 6	1.0401	0.620501	0.690741
GO:0002223	stimulatory C-type lectin receptor signaling pathway	CD209	CDSIGN|CLEC4L|DC-SIGN|DC-SIGN1	CD209 molecule	1.02319	0.626462	0.697072
GO:0007399	nervous system development	PCDHB4	PCDH-BETA4	protocadherin beta 4	0.935705	0.63232	0.70267
GO:0007399	nervous system development	GFRA2	GDNFRB|NRTNR-ALPHA|NTNRA|RETL2|TRNR2	GDNF family receptor alpha 2	0.935705	0.63232	0.70267
GO:0006470	protein dephosphorylation	DUSP27	-	dual specificity phosphatase 27 (putative)	0.998828	0.635227	0.705592
GO:0043524	negative regulation of neuron apoptotic process	FAIM2	LFG|LFG2|NGP35|NMP35|TMBIM2	Fas apoptotic inhibitory molecule 2	0.9756	0.643785	0.712249
GO:0001934	positive regulation of protein phosphorylation	ITLN1	HL-1|HL1|INTL|ITLN|LFR|hIntL|omentin	intelectin 1	0.953427	0.65214	0.712249
GO:0048010	vascular endothelial growth factor receptor signaling pathway	ACTN2	CMD1AA|CMH23	actinin alpha 2	0.895746	0.655439	0.714947
GO:0048010	vascular endothelial growth factor receptor signaling pathway	HSPB1	CMT2F|HEL-S-102|HMN2B|HS.76067|HSP27|HSP28|Hsp25|SRP27	heat shock protein family B (small) member 1	0.895746	0.655439	0.714947
GO:0051056	regulation of small GTPase mediated signal transduction	RHOB	ARH6|ARHB|MST081|MSTP081|RHOH6	ras homolog family member B	0.939197	0.657601	0.715204
GO:0050911	detection of chemical stimulus involved in sensory perception of smell	OR52E6	OR11-58	olfactory receptor family 52 subfamily E member 6	0.88837	0.65764	0.715204
GO:0050911	detection of chemical stimulus involved in sensory perception of smell	OR5V1	6M1-21|hs6M1-21	olfactory receptor family 5 subfamily V member 1	0.88837	0.65764	0.715204
GO:0050911	detection of chemical stimulus involved in sensory perception of smell	OR51B6	HOR5'Beta6	olfactory receptor family 51 subfamily B member 6	0.88837	0.65764	0.715204
GO:0050776	regulation of immune response	CD34	-	CD34 molecule	0.925385	0.662976	0.719201
GO:0000122	negative regulation of transcription from RNA polymerase II promoter	KCNIP3	CSEN|DREAM|KCHIP3	potassium voltage-gated channel interacting protein 3	0.888788	0.663009	0.719201
GO:0000122	negative regulation of transcription from RNA polymerase II promoter	DNAJB5	Hsc40	DnaJ heat shock protein family (Hsp40) member B5	0.888788	0.663009	0.719201
GO:0000122	negative regulation of transcription from RNA polymerase II promoter	ARID5B	DESRT|MRF-2|MRF2	AT-rich interaction domain 5B	0.888788	0.663009	0.719201
GO:0000122	negative regulation of transcription from RNA polymerase II promoter	MYOCD	MYCD	myocardin	0.888788	0.663009	0.719201
GO:0000122	negative regulation of transcription from RNA polymerase II promoter	TXNIP	EST01027|HHCPA78|THIF|VDUP1	thioredoxin interacting protein	0.888788	0.663009	0.719201
GO:0006508	proteolysis	CFD	ADIPSIN|ADN|DF|PFD	complement factor D (adipsin)	0.873975	0.668167	0.723871
GO:0006508	proteolysis	TPSAB1	TPS1|TPS2|TPSB1	tryptase alpha/beta 1	0.873975	0.668167	0.723871
GO:0006508	proteolysis	TPSD1	MCP7-LIKE|MCP7L1|MMCP-7L	tryptase delta 1	0.873975	0.668167	0.723871
GO:0006810	transport	CACNB2	CACNLB2|CAVB2|MYSB	calcium voltage-gated channel auxiliary subunit beta 2	0.850354	0.682663	0.738006
GO:0006810	transport	LYVE1	CRSBP-1|HAR|LYVE-1|XLKD1	lymphatic vessel endothelial hyaluronan receptor 1	0.850354	0.682663	0.738006
GO:0007050	cell cycle arrest	TGFB2	LDS4|TGF-beta2	transforming growth factor beta 2	0.873975	0.683637	0.738746
GO:0033209	tumor necrosis factor-mediated signaling pathway	TNFRSF12A	CD266|FN14|TWEAKR	tumor necrosis factor receptor superfamily member 12A	0.862002	0.688601	0.743163
GO:0008286	insulin receptor signaling pathway	ACTN2	CMD1AA|CMH23	actinin alpha 2	0.836228	0.691333	0.74548
GO:0008286	insulin receptor signaling pathway	SORBS1	CAP|FLAF2|R85FL|SH3D5|SH3P12|SORB1	sorbin and SH3 domain containing 1	0.836228	0.691333	0.74548
GO:0030154	cell differentiation	SOHLH1	C9orf157|NOHLH|SPATA27|TEB2|bA100C15.3|bHLHe80	spermatogenesis and oogenesis specific basic helix-loop-helix 1	0.840884	0.692723	0.746031
GO:0030154	cell differentiation	FOXG1	BF1|BF2|FHKL3|FKH2|FKHL1|FKHL2|FKHL3|FKHL4|FOXG1A|FOXG1B|FOXG1C|HBF-1|HBF-2|HBF-3|HBF-G2|HBF2|HFK1|HFK2|HFK3|KHL2|QIN	forkhead box G1	0.840884	0.692723	0.746031
GO:0030154	cell differentiation	SMOC1	OAS	SPARC related modular calcium binding 1	0.840884	0.692723	0.746031
GO:0006302	double-strand break repair	VCP	ALS14|CMT2Y|HEL-220|HEL-S-70|IBMPFD|IBMPFD1|TERA|p97	valosin containing protein	0.833459	0.700668	0.753633
GO:0043123	positive regulation of I-kappaB kinase/NF-kappaB signaling	GPRC5B	RAIG-2|RAIG2	G protein-coupled receptor class C group 5 member B	0.817223	0.707682	0.760855
GO:0016055	Wnt signaling pathway	APCDD1	B7323|DRAPC1|FP7019|HHS|HTS|HYPT1	adenomatosis polyposis coli down-regulated 1	0.796534	0.716776	0.769983
GO:0051607	defense response to virus	DDIT4	Dig2|REDD-1|REDD1	DNA damage inducible transcript 4	0.796534	0.716776	0.769983
GO:0007173	epidermal growth factor receptor signaling pathway	ACTN2	CMD1AA|CMH23	actinin alpha 2	0.781692	0.725603	0.777825
GO:0007173	epidermal growth factor receptor signaling pathway	GAREM1	C18orf11|FAM59A|GAREM|Gm944	GRB2 associated regulator of MAPK1 subtype 1	0.781692	0.725603	0.777825
GO:0042127	regulation of cell proliferation	TXNIP	EST01027|HHCPA78|THIF|VDUP1	thioredoxin interacting protein	0.7721	0.727745	0.779793
GO:0006888	ER to Golgi vesicle-mediated transport	VCP	ALS14|CMT2Y|HEL-220|HEL-S-70|IBMPFD|IBMPFD1|TERA|p97	valosin containing protein	0.762742	0.732012	0.783687
GO:0045892	negative regulation of transcription, DNA-templated	FOXG1	BF1|BF2|FHKL3|FKH2|FKHL1|FKHL2|FKHL3|FKHL4|FOXG1A|FOXG1B|FOXG1C|HBF-1|HBF-2|HBF-3|HBF-G2|HBF2|HFK1|HFK2|HFK3|KHL2|QIN	forkhead box G1	0.788219	0.732611	0.783687
GO:0045892	negative regulation of transcription, DNA-templated	ARID5B	DESRT|MRF-2|MRF2	AT-rich interaction domain 5B	0.788219	0.732611	0.783687
GO:0045892	negative regulation of transcription, DNA-templated	ARID5A	MRF-1|MRF1|RP11-363D14	AT-rich interaction domain 5A	0.788219	0.732611	0.783687
GO:0070374	positive regulation of ERK1 and ERK2 cascade	GAREM1	C18orf11|FAM59A|GAREM|Gm944	GRB2 associated regulator of MAPK1 subtype 1	0.735979	0.744413	0.795978
GO:0006644	phospholipid metabolic process	PIP5K1C	LCCS3|PIP5K-GAMMA|PIP5K1-gamma|PIP5Kgamma	phosphatidylinositol-4-phosphate 5-kinase, type I, gamma	0.72747	0.748417	0.799588
GO:0044255	cellular lipid metabolic process	CYP1A1	AHH|AHRR|CP11|CYP1|CYPIA1|P1-450|P450-C|P450DX	cytochrome P450 family 1 subfamily A member 1	0.719156	0.752358	0.803125
GO:0030335	positive regulation of cell migration	MYOC	GLC1A|GPOA|JOAG|JOAG1|TIGR	myocilin	0.71507	0.754305	0.804866
GO:0007049	cell cycle	TXNIP	EST01027|HHCPA78|THIF|VDUP1	thioredoxin interacting protein	0.673007	0.774733	0.82528
GO:0006974	cellular response to DNA damage stimulus	VCP	ALS14|CMT2Y|HEL-220|HEL-S-70|IBMPFD|IBMPFD1|TERA|p97	valosin containing protein	0.645397	0.788507	0.837152
GO:0007283	spermatogenesis	FSTL3	FLRG|FSRP	follistatin like 3	0.678449	0.793055	0.840579
GO:0007283	spermatogenesis	SOHLH1	C9orf157|NOHLH|SPATA27|TEB2|bA100C15.3|bHLHe80	spermatogenesis and oogenesis specific basic helix-loop-helix 1	0.678449	0.793055	0.840579
GO:0006281	DNA repair	HSPA1A	HEL-S-103|HSP70-1|HSP70-1A|HSP70.1|HSP70I|HSP72|HSPA1	heat shock protein family A (Hsp70) member 1A	0.662381	0.803704	0.850804
GO:0006281	DNA repair	VCP	ALS14|CMT2Y|HEL-220|HEL-S-70|IBMPFD|IBMPFD1|TERA|p97	valosin containing protein	0.662381	0.803704	0.850804
GO:0006366	transcription from RNA polymerase II promoter	MYOCD	MYCD	myocardin	0.685222	0.81143	0.857913
GO:0006366	transcription from RNA polymerase II promoter	CREB5	CRE-BPA|CREB-5	cAMP responsive element binding protein 5	0.685222	0.81143	0.857913
GO:0006366	transcription from RNA polymerase II promoter	SOHLH1	C9orf157|NOHLH|SPATA27|TEB2|bA100C15.3|bHLHe80	spermatogenesis and oogenesis specific basic helix-loop-helix 1	0.685222	0.81143	0.857913
GO:0048011	neurotrophin TRK receptor signaling pathway	ACTN2	CMD1AA|CMH23	actinin alpha 2	0.637227	0.82036	0.865917
GO:0048011	neurotrophin TRK receptor signaling pathway	DDIT4	Dig2|REDD-1|REDD1	DNA damage inducible transcript 4	0.637227	0.82036	0.865917
GO:0006325	chromatin organization	ARID5B	DESRT|MRF-2|MRF2	AT-rich interaction domain 5B	0.531023	0.848078	0.893323
GO:0007067	mitotic nuclear division	NEDD9	CAS-L|CAS2|CASL|CASS2|HEF1	neural precursor cell expressed, developmentally down-regulated 9	0.524385	0.851622	0.896685
GO:0018279	protein N-linked glycosylation via asparagine	VCP	ALS14|CMT2Y|HEL-220|HEL-S-70|IBMPFD|IBMPFD1|TERA|p97	valosin containing protein	0.509524	0.85957	0.90468
GO:0006367	transcription initiation from RNA polymerase II promoter	DDIT4	Dig2|REDD-1|REDD1	DNA damage inducible transcript 4	0.501404	0.863918	0.908881
GO:0043547	positive regulation of GTPase activity	AMPH	AMPH1	amphiphysin	0.521128	0.89465	0.938112
GO:0043547	positive regulation of GTPase activity	CHRM4	HM4|M4R	cholinergic receptor muscarinic 4	0.521128	0.89465	0.938112
GO:0019221	cytokine-mediated signaling pathway	IL31RA	CRL|CRL3|GLM-R|GLMR|GPL|IL-31RA|PLCA2|PRO21384|hGLM-R	interleukin 31 receptor A	0.435475	0.899034	0.941933
GO:0008543	fibroblast growth factor receptor signaling pathway	ACTN2	CMD1AA|CMH23	actinin alpha 2	0.431001	0.901383	0.944006
GO:0007264	small GTPase mediated signal transduction	RASL12	RIS	RAS like family 12	0.534783	0.916106	0.955887
GO:0007264	small GTPase mediated signal transduction	ACTN2	CMD1AA|CMH23	actinin alpha 2	0.534783	0.916106	0.955887
GO:0007264	small GTPase mediated signal transduction	RHOB	ARH6|ARHB|MST081|MSTP081|RHOH6	ras homolog family member B	0.534783	0.916106	0.955887
GO:0038095	Fc-epsilon receptor signaling pathway	ACTN2	CMD1AA|CMH23	actinin alpha 2	0.399531	0.917656	0.956721
GO:0034641	cellular nitrogen compound metabolic process	HPD	4-HPPD|4HPPD|GLOD3|HPPDASE|PPD	4-hydroxyphenylpyruvate dioxygenase	0.388433	0.923262	0.960953
GO:0051301	cell division	NEDD9	CAS-L|CAS2|CASL|CASS2|HEF1	neural precursor cell expressed, developmentally down-regulated 9	0.387238	0.92386	0.960953
GO:0016032	viral process	TSPAN7	A15|CCG-B7|CD231|DXS1692E|MRX58|MXS1|TALLA-1|TM4SF2|TM4SF2b	tetraspanin 7	0.457645	0.930686	0.964426
GO:0016032	viral process	KRT19	CK19|K19|K1CS	keratin 19	0.457645	0.930686	0.964426
GO:0045944	positive regulation of transcription from RNA polymerase II promoter	FSTL3	FLRG|FSRP	follistatin like 3	0.533838	0.937799	0.96821
GO:0045944	positive regulation of transcription from RNA polymerase II promoter	MYOCD	MYCD	myocardin	0.533838	0.937799	0.96821
GO:0045944	positive regulation of transcription from RNA polymerase II promoter	CYTL1	C17|C4orf4	cytokine like 1	0.533838	0.937799	0.96821
GO:0045944	positive regulation of transcription from RNA polymerase II promoter	SOHLH1	C9orf157|NOHLH|SPATA27|TEB2|bA100C15.3|bHLHe80	spermatogenesis and oogenesis specific basic helix-loop-helix 1	0.533838	0.937799	0.96821
GO:0016567	protein ubiquitination	VCP	ALS14|CMT2Y|HEL-220|HEL-S-70|IBMPFD|IBMPFD1|TERA|p97	valosin containing protein	0.345748	0.943883	0.974097
GO:0015031	protein transport	SELENBP1	HEL-S-134P|LPSB|SBP56|SP56|hSBP	selenium binding protein 1	0.324362	0.953476	0.980986
GO:0008152	metabolic process	MYO18B	KFS4	myosin XVIIIB	0.298937	0.964034	0.984126
GO:0006468	protein phosphorylation	TGFB2	LDS4|TGF-beta2	transforming growth factor beta 2	0.28218	0.970397	0.990224
GO:0007275	multicellular organism development	ADRA1D	ADRA1|ADRA1A|ADRA1R|ALPHA1|DAR|dJ779E11.2	adrenoceptor alpha 1D	0.279672	0.971304	0.990753
GO:0043687	post-translational protein modification	MUC16	CA125	mucin 16, cell surface associated	0.273592	0.973452	0.992508
GO:0010467	gene expression	HSPA1A	HEL-S-103|HSP70-1|HSP70-1A|HSP70.1|HSP70I|HSP72|HSPA1	heat shock protein family A (Hsp70) member 1A	0.39411	0.979892	0.996322
GO:0010467	gene expression	DDIT4	Dig2|REDD-1|REDD1	DNA damage inducible transcript 4	0.39411	0.979892	0.996322
GO:0010467	gene expression	HSPB1	CMT2F|HEL-S-102|HMN2B|HS.76067|HSP27|HSP28|Hsp25|SRP27	heat shock protein family B (small) member 1	0.39411	0.979892	0.996322
GO:0006351	transcription, DNA-templated	FSTL3	FLRG|FSRP	follistatin like 3	0.41673	0.994604	0.998226
GO:0006351	transcription, DNA-templated	TXNIP	EST01027|HHCPA78|THIF|VDUP1	thioredoxin interacting protein	0.41673	0.994604	0.998226
GO:0006351	transcription, DNA-templated	FOXG1	BF1|BF2|FHKL3|FKH2|FKHL1|FKHL2|FKHL3|FKHL4|FOXG1A|FOXG1B|FOXG1C|HBF-1|HBF-2|HBF-3|HBF-G2|HBF2|HFK1|HFK2|HFK3|KHL2|QIN	forkhead box G1	0.41673	0.994604	0.998226
GO:0006351	transcription, DNA-templated	ARID5A	MRF-1|MRF1|RP11-363D14	AT-rich interaction domain 5A	0.41673	0.994604	0.998226
GO:0006351	transcription, DNA-templated	ARID5B	DESRT|MRF-2|MRF2	AT-rich interaction domain 5B	0.41673	0.994604	0.998226
GO:0006351	transcription, DNA-templated	KCNIP3	CSEN|DREAM|KCHIP3	potassium voltage-gated channel interacting protein 3	0.41673	0.994604	0.998226
GO:0006355	regulation of transcription, DNA-templated	PDLIM1	CLIM1|CLP-36|CLP36|HEL-S-112|hCLIM1	PDZ and LIM domain 1	0.290428	0.997443	0.998226
GO:0006355	regulation of transcription, DNA-templated	SAMD4A	SAMD4|SMAUG|SMAUG1|SMG|SMGA	sterile alpha motif domain containing 4A	0.290428	0.997443	0.998226
GO:0006355	regulation of transcription, DNA-templated	ABCG1	ABC8|WHITE1	ATP binding cassette subfamily G member 1	0.290428	0.997443	0.998226
GO:0044267	cellular protein metabolic process	MUC16	CA125	mucin 16, cell surface associated	0.142528	0.998975	0.998975

## Sheet: Down_GO_Enrichment
GO_ID	GO_Name	Population_mapped_id	study_mapped_id	enrichment	p_value	FDR
GO:0009615	response to virus	108	11	4.92249	3.74395e-05	0.0144345
GO:0006954	inflammatory response	363	21	2.79594	6.62417e-05	0.0144345
GO:0072012	glomerulus vasculature development	3	3	48.3299	0.000161479	0.029897
GO:0060337	type I interferon signaling pathway	69	8	5.60347	0.000184364	0.029897
GO:0007623	circadian rhythm	93	9	4.67709	0.000261387	0.0319764
GO:0032570	response to progesterone	40	6	7.24948	0.00033772	0.0346312
GO:0071376	cellular response to corticotropin-releasing hormone stimulus	5	3	28.9979	0.000438413	0.0351386
GO:0009597	detection of virus	5	3	28.9979	0.000438413	0.0351386
GO:0035690	cellular response to drug	67	7	5.04939	0.000810715	0.0513075
GO:0050869	negative regulation of B cell activation	7	3	20.7128	0.000910994	0.0513075
GO:0016255	attachment of GPI anchor to protein	7	3	20.7128	0.000910994	0.0513075
GO:0000042	protein targeting to Golgi	18	4	10.74	0.000942082	0.0513075
GO:0031622	positive regulation of fever generation	8	3	18.1237	0.00123353	0.0513075
GO:0002237	response to molecule of bacterial origin	8	3	18.1237	0.00123353	0.0513075
GO:0042384	cilium assembly	119	9	3.6552	0.00135033	0.0513075
GO:0035058	nonmotile primary cilium assembly	21	4	9.20569	0.00155133	0.0513075
GO:0035721	intraciliary retrograde transport	9	3	16.11	0.00161967	0.0513075
GO:0001580	detection of chemical stimulus involved in sensory perception of bitter taste	38	5	6.3592	0.00178565	0.0513075
GO:0000122	negative regulation of transcription from RNA polymerase II promoter	708	28	1.91135	0.00181101	0.0513075
GO:0009612	response to mechanical stimulus	58	6	4.99964	0.00197459	0.0513075
GO:0045071	negative regulation of viral genome replication	39	5	6.19614	0.00198078	0.0513075
GO:0030522	intracellular receptor signaling pathway	39	5	6.19614	0.00198078	0.0513075
GO:0060674	placenta blood vessel development	10	3	14.499	0.00207355	0.0513075
GO:0090023	positive regulation of neutrophil chemotaxis	23	4	8.4052	0.00208328	0.0513075
GO:0071260	cellular response to mechanical stimulus	80	7	4.22887	0.00208968	0.0513075
GO:0032868	response to insulin	60	6	4.83299	0.00231127	0.0527821
GO:0001819	positive regulation of cytokine production	24	4	8.05498	0.00239128	0.0527821
GO:0039528	cytoplasmic pattern recognition receptor signaling pathway in response to virus	2	2	48.3299	0.00241722	0.0527821
GO:0015798	myo-inositol transport	2	2	48.3299	0.00241722	0.0527821
GO:0034344	regulation of type III interferon production	2	2	48.3299	0.00241722	0.0527821
GO:0021997	neural plate axis specification	2	2	48.3299	0.00241722	0.0527821
GO:0051092	positive regulation of NF-kappaB transcription factor activity	131	9	3.32037	0.00249242	0.0527821
GO:0060213	positive regulation of nuclear-transcribed mRNA poly(A) tail shortening	11	3	13.1809	0.00259898	0.0527821
GO:0051607	defense response to virus	158	10	3.05885	0.00260198	0.0527821
GO:0048711	positive regulation of astrocyte differentiation	12	3	12.0825	0.00319943	0.0527821
GO:0010738	regulation of protein kinase A signaling	12	3	12.0825	0.00319943	0.0527821
GO:2000352	negative regulation of endothelial cell apoptotic process	27	4	7.15998	0.00350008	0.0527821
GO:0032757	positive regulation of interleukin-8 production	27	4	7.15998	0.00350008	0.0527821
GO:0048014	Tie signaling pathway	3	2	32.2199	0.00397403	0.0527821
GO:0045132	meiotic chromosome segregation	3	2	32.2199	0.00397403	0.0527821
GO:0097112	gamma-aminobutyric acid receptor clustering	3	2	32.2199	0.00397403	0.0527821
GO:2000978	negative regulation of forebrain neuron differentiation	3	2	32.2199	0.00397403	0.0527821
GO:0051383	kinetochore organization	3	2	32.2199	0.00397403	0.0527821
GO:0051726	regulation of cell cycle	116	8	3.3331	0.00412797	0.0527821
GO:0045444	fat cell differentiation	69	6	4.2026	0.00438317	0.0527821
GO:0019221	cytokine-mediated signaling pathway	289	14	2.34124	0.00442132	0.0527821
GO:0010628	positive regulation of gene expression	229	12	2.53257	0.00448072	0.0527821
GO:0035914	skeletal muscle cell differentiation	48	5	5.03436	0.004497	0.0527821
GO:0007076	mitotic chromosome condensation	14	3	10.3564	0.00463782	0.0527821
GO:0032496	response to lipopolysaccharide	176	10	2.74602	0.00531765	0.0527821
GO:0006357	regulation of transcription from RNA polymerase II promoter	361	16	2.14205	0.00556858	0.0533375
GO:0006769	nicotinamide metabolic process	4	2	24.1649	0.0058803	0.0558629
GO:0097368	establishment of Sertoli cell barrier	4	2	24.1649	0.0058803	0.0558629
GO:2000373	positive regulation of DNA topoisomerase (ATP-hydrolyzing) activity	4	2	24.1649	0.0058803	0.0558629
GO:0071347	cellular response to interleukin-1	75	6	3.86639	0.00637017	0.060026
GO:0034097	response to cytokine	54	5	4.47499	0.00709384	0.0621424
GO:0051591	response to cAMP	54	5	4.47499	0.00709384	0.0621424
GO:0060333	interferon-gamma-mediated signaling pathway	77	6	3.76597	0.00715802	0.0622355
GO:0071539	protein localization to centrosome	17	3	8.52881	0.00742819	0.063183
GO:0043524	negative regulation of neuron apoptotic process	129	8	2.9972	0.0074301	0.063183
GO:0016310	phosphorylation	103	7	3.28456	0.00758762	0.0639427
GO:0001525	angiogenesis	217	11	2.4499	0.00789155	0.0639427
GO:0043330	response to exogenous dsRNA	35	4	5.52342	0.00803952	0.0639427
GO:0061469	regulation of type B pancreatic cell proliferation	5	2	19.332	0.00812112	0.0639427
GO:0010757	negative regulation of plasminogen activation	5	2	19.332	0.00812112	0.0639427
GO:0002634	regulation of germinal center formation	5	2	19.332	0.00812112	0.0639427
GO:0048024	regulation of mRNA splicing, via spliceosome	5	2	19.332	0.00812112	0.0639427
GO:0019563	glycerol catabolic process	5	2	19.332	0.00812112	0.0639427
GO:0010032	meiotic chromosome condensation	5	2	19.332	0.00812112	0.0639427
GO:0017148	negative regulation of translation	56	5	4.31517	0.00815217	0.0639427
GO:0008589	regulation of smoothened signaling pathway	18	3	8.05498	0.00853563	0.0665016
GO:0043066	negative regulation of apoptotic process	482	19	1.90512	0.00873513	0.0666412
GO:0043200	response to amino acid	37	4	5.22485	0.00958493	0.0724899
GO:0010596	negative regulation of endothelial cell migration	19	3	7.63104	0.00973462	0.073146
GO:0032722	positive regulation of chemokine production	19	3	7.63104	0.00973462	0.073146
GO:0007596	blood coagulation	490	19	1.87402	0.0101821	0.0749737
GO:0019217	regulation of fatty acid metabolic process	6	2	16.11	0.010682	0.0768687
GO:0097527	necroptotic signaling pathway	6	2	16.11	0.010682	0.0768687
GO:0071636	positive regulation of transforming growth factor beta production	6	2	16.11	0.010682	0.0768687
GO:0014842	regulation of skeletal muscle satellite cell proliferation	6	2	16.11	0.010682	0.0768687
GO:0032680	regulation of tumor necrosis factor production	6	2	16.11	0.010682	0.0768687
GO:0010508	positive regulation of autophagy	39	4	4.95691	0.011311	0.0798296
GO:0045184	establishment of protein localization	39	4	4.95691	0.011311	0.0798296
GO:0043065	positive regulation of apoptotic process	296	13	2.1226	0.0122506	0.0840836
GO:0001666	response to hypoxia	171	9	2.54368	0.0123237	0.0840836
GO:0050900	leukocyte migration	116	7	2.91646	0.0134931	0.0904954
GO:0006020	inositol metabolic process	7	2	13.8085	0.013549	0.0904954
GO:0043576	regulation of respiratory gaseous exchange	7	2	13.8085	0.013549	0.0904954
GO:0035735	intraciliary transport involved in cilium morphogenesis	7	2	13.8085	0.013549	0.0904954
GO:0051694	pointed-end actin filament capping	7	2	13.8085	0.013549	0.0904954
GO:0060831	smoothened signaling pathway involved in dorsal/ventral neural tube patterning	7	2	13.8085	0.013549	0.0904954
GO:0010042	response to manganese ion	7	2	13.8085	0.013549	0.0904954
GO:0042346	positive regulation of NF-kappaB import into nucleus	22	3	6.59044	0.0138936	0.0911452
GO:0034394	protein localization to cell surface	22	3	6.59044	0.0138936	0.0911452
GO:0045429	positive regulation of nitric oxide biosynthetic process	42	4	4.60285	0.0142541	0.091523
GO:0043434	response to peptide hormone	43	4	4.4958	0.0153327	0.0955534
GO:0006904	vesicle docking involved in exocytosis	23	3	6.3039	0.0154705	0.0955534
GO:0051090	regulation of sequence-specific DNA binding transcription factor activity	23	3	6.3039	0.0154705	0.0955534
GO:0007165	signal transduction	1036	33	1.53947	0.0159373	0.0955534
GO:0006366	transcription from RNA polymerase II promoter	551	20	1.75426	0.0160055	0.0955534
GO:0006688	glycosphingolipid biosynthetic process	8	2	12.0825	0.0167085	0.0989036
GO:0021707	cerebellar granule cell differentiation	8	2	12.0825	0.0167085	0.0989036
GO:1901409	positive regulation of phosphorylation of RNA polymerase II C-terminal domain	8	2	12.0825	0.0167085	0.0989036
GO:0045080	positive regulation of chemokine biosynthetic process	8	2	12.0825	0.0167085	0.0989036
GO:0008380	RNA splicing	244	11	2.17881	0.0169281	0.0992762
GO:0051412	response to corticosterone	24	3	6.04124	0.0171439	0.100037
GO:0007422	peripheral nervous system development	24	3	6.04124	0.0171439	0.100037
GO:0007157	heterophilic cell-cell adhesion via plasma membrane cell adhesion molecules	45	4	4.29599	0.0176403	0.101018
GO:0060326	cell chemotaxis	45	4	4.29599	0.0176403	0.101018
GO:0006955	immune response	346	14	1.95554	0.0178336	0.101018
GO:0070266	necroptotic process	25	3	5.79959	0.0189142	0.105048
GO:0043001	Golgi to plasma membrane protein transport	25	3	5.79959	0.0189142	0.105048
GO:0034198	cellular response to amino acid starvation	25	3	5.79959	0.0189142	0.105048
GO:1900027	regulation of ruffle assembly	9	2	10.74	0.0201474	0.105048
GO:0030728	ovulation	9	2	10.74	0.0201474	0.105048
GO:0030162	regulation of proteolysis	9	2	10.74	0.0201474	0.105048
GO:0043116	negative regulation of vascular permeability	9	2	10.74	0.0201474	0.105048
GO:0035767	endothelial cell chemotaxis	9	2	10.74	0.0201474	0.105048
GO:1902902	negative regulation of autophagosome assembly	9	2	10.74	0.0201474	0.105048
GO:0060137	maternal process involved in parturition	9	2	10.74	0.0201474	0.105048
GO:0006353	DNA-templated transcription, termination	9	2	10.74	0.0201474	0.105048
GO:1903507	negative regulation of nucleic acid-templated transcription	47	4	4.11318	0.0201526	0.105048
GO:0032755	positive regulation of interleukin-6 production	47	4	4.11318	0.0201526	0.105048
GO:0006351	transcription, DNA-templated	1812	52	1.38695	0.0205122	0.105048
GO:0045944	positive regulation of transcription from RNA polymerase II promoter	943	30	1.53754	0.020664	0.105048
GO:0044344	cellular response to fibroblast growth factor stimulus	26	3	5.57653	0.0207817	0.105048
GO:0043278	response to morphine	26	3	5.57653	0.0207817	0.105048
GO:0045893	positive regulation of transcription, DNA-templated	495	18	1.75745	0.0208925	0.105048
GO:0042493	response to drug	320	13	1.9634	0.0211685	0.105048
GO:0043687	post-translational protein modification	460	17	1.7861	0.0212114	0.105048
GO:0006396	RNA processing	73	5	3.31027	0.0218042	0.107601
GO:0032728	positive regulation of interferon-beta production	27	3	5.36999	0.0227466	0.110762
GO:0071549	cellular response to dexamethasone stimulus	27	3	5.36999	0.0227466	0.110762
GO:0043542	endothelial cell migration	27	3	5.36999	0.0227466	0.110762
GO:0007528	neuromuscular junction development	27	3	5.36999	0.0227466	0.110762
GO:0031532	actin cytoskeleton reorganization	49	4	3.9453	0.0228737	0.110763
GO:0060445	branching involved in salivary gland morphogenesis	10	2	9.66598	0.0238529	0.113437
GO:0010941	regulation of cell death	10	2	9.66598	0.0238529	0.113437
GO:0032725	positive regulation of granulocyte macrophage colony-stimulating factor production	10	2	9.66598	0.0238529	0.113437
GO:0009435	NAD biosynthetic process	10	2	9.66598	0.0238529	0.113437
GO:0032486	Rap protein signal transduction	10	2	9.66598	0.0238529	0.113437
GO:0090331	negative regulation of platelet aggregation	10	2	9.66598	0.0238529	0.113437
GO:0031669	cellular response to nutrient levels	10	2	9.66598	0.0238529	0.113437
GO:1903364	positive regulation of cellular protein catabolic process	10	2	9.66598	0.0238529	0.113437
GO:0035457	cellular response to interferon-alpha	10	2	9.66598	0.0238529	0.113437
GO:0014070	response to organic cyclic compound	50	4	3.86639	0.0243137	0.114787
GO:0006936	muscle contraction	106	6	2.73565	0.0276643	0.122728
GO:0006098	pentose-phosphate shunt	11	2	8.78725	0.0278128	0.122728
GO:0009312	oligosaccharide biosynthetic process	11	2	8.78725	0.0278128	0.122728
GO:0000380	alternative mRNA splicing, via spliceosome	11	2	8.78725	0.0278128	0.122728
GO:0010955	negative regulation of protein processing	11	2	8.78725	0.0278128	0.122728
GO:0090161	Golgi ribbon formation	11	2	8.78725	0.0278128	0.122728
GO:0030239	myofibril assembly	11	2	8.78725	0.0278128	0.122728
GO:0045824	negative regulation of innate immune response	11	2	8.78725	0.0278128	0.122728
GO:0045744	negative regulation of G-protein coupled receptor protein signaling pathway	11	2	8.78725	0.0278128	0.122728
GO:0007568	aging	167	8	2.3152	0.0281735	0.122728
GO:0001937	negative regulation of endothelial cell proliferation	30	3	4.83299	0.0292241	0.122728
GO:0043401	steroid hormone mediated signaling pathway	54	4	3.57999	0.0306119	0.122728
GO:0043547	positive regulation of GTPase activity	483	17	1.70105	0.031073	0.122728
GO:0007628	adult walking behavior	31	3	4.67709	0.0315767	0.122728
GO:0070374	positive regulation of ERK1 and ERK2 cascade	171	8	2.26105	0.0315893	0.122728
GO:2000178	negative regulation of neural precursor cell proliferation	12	2	8.05498	0.0320151	0.122728
GO:0071360	cellular response to exogenous dsRNA	12	2	8.05498	0.0320151	0.122728
GO:0035108	limb morphogenesis	12	2	8.05498	0.0320151	0.122728
GO:0060707	trophoblast giant cell differentiation	12	2	8.05498	0.0320151	0.122728
GO:0001944	vasculature development	12	2	8.05498	0.0320151	0.122728
GO:0032695	negative regulation of interleukin-12 production	12	2	8.05498	0.0320151	0.122728
GO:1901224	positive regulation of NIK/NF-kappaB signaling	12	2	8.05498	0.0320151	0.122728
GO:2001275	positive regulation of glucose import in response to insulin stimulus	12	2	8.05498	0.0320151	0.122728
GO:0034453	microtubule anchoring	12	2	8.05498	0.0320151	0.122728
GO:2000505	regulation of energy homeostasis	12	2	8.05498	0.0320151	0.122728
GO:0032727	positive regulation of interferon-alpha production	12	2	8.05498	0.0320151	0.122728
GO:0050678	regulation of epithelial cell proliferation	12	2	8.05498	0.0320151	0.122728
GO:0055003	cardiac myofibril assembly	12	2	8.05498	0.0320151	0.122728
GO:0045721	negative regulation of gluconeogenesis	12	2	8.05498	0.0320151	0.122728
GO:0050727	regulation of inflammatory response	55	4	3.5149	0.0323223	0.123363
GO:0071333	cellular response to glucose stimulus	55	4	3.5149	0.0323223	0.123363
GO:0009314	response to radiation	32	3	4.53093	0.0340252	0.127929
GO:0006501	C-terminal protein lipidation	32	3	4.53093	0.0340252	0.127929
GO:0072659	protein localization to plasma membrane	56	4	3.45214	0.0340875	0.127929
GO:0032922	circadian regulation of gene expression	57	4	3.39157	0.0359075	0.128117
GO:0042102	positive regulation of T cell proliferation	57	4	3.39157	0.0359075	0.128117
GO:0006622	protein targeting to lysosome	13	2	7.43537	0.0364483	0.128117
GO:1900153	positive regulation of nuclear-transcribed mRNA catabolic process, deadenylation-dependent decay	13	2	7.43537	0.0364483	0.128117
GO:0048715	negative regulation of oligodendrocyte differentiation	13	2	7.43537	0.0364483	0.128117
GO:0051926	negative regulation of calcium ion transport	13	2	7.43537	0.0364483	0.128117
GO:0015939	pantothenate metabolic process	13	2	7.43537	0.0364483	0.128117
GO:0050930	induction of positive chemotaxis	13	2	7.43537	0.0364483	0.128117
GO:0097009	energy homeostasis	13	2	7.43537	0.0364483	0.128117
GO:0051016	barbed-end actin filament capping	13	2	7.43537	0.0364483	0.128117
GO:0048821	erythrocyte development	13	2	7.43537	0.0364483	0.128117
GO:0016925	protein sumoylation	114	6	2.54368	0.0369037	0.128117
GO:0006950	response to stress	58	4	3.3331	0.0377825	0.128117
GO:0050679	positive regulation of epithelial cell proliferation	58	4	3.3331	0.0377825	0.128117
GO:0006928	movement of cell or subcellular component	86	5	2.80988	0.0387802	0.128117
GO:0045907	positive regulation of vasoconstriction	34	3	4.2644	0.0392074	0.128117
GO:0032480	negative regulation of type I interferon production	34	3	4.2644	0.0392074	0.128117
GO:0048661	positive regulation of smooth muscle cell proliferation	59	4	3.2766	0.0397125	0.128117
GO:0007015	actin filament organization	59	4	3.2766	0.0397125	0.128117
GO:2000739	regulation of mesenchymal stem cell differentiation	1	1	48.3299	0.0402317	0.128117
GO:0038195	urokinase plasminogen activator signaling pathway	1	1	48.3299	0.0402317	0.128117
GO:0034157	positive regulation of toll-like receptor 7 signaling pathway	1	1	48.3299	0.0402317	0.128117
GO:0035564	regulation of kidney size	1	1	48.3299	0.0402317	0.128117
GO:2000845	positive regulation of testosterone secretion	1	1	48.3299	0.0402317	0.128117
GO:0050928	negative regulation of positive chemotaxis	1	1	48.3299	0.0402317	0.128117
GO:0061106	negative regulation of stomach neuroendocrine cell differentiation	1	1	48.3299	0.0402317	0.128117
GO:0070091	glucagon secretion	1	1	48.3299	0.0402317	0.128117
GO:0071414	cellular response to methotrexate	1	1	48.3299	0.0402317	0.128117
GO:1904251	regulation of bile acid metabolic process	1	1	48.3299	0.0402317	0.128117
GO:0045898	regulation of RNA polymerase II transcriptional preinitiation complex assembly	1	1	48.3299	0.0402317	0.128117
GO:0009956	radial pattern formation	1	1	48.3299	0.0402317	0.128117
GO:0034148	negative regulation of toll-like receptor 5 signaling pathway	1	1	48.3299	0.0402317	0.128117
GO:1900139	negative regulation of arachidonic acid secretion	1	1	48.3299	0.0402317	0.128117
GO:0090126	protein complex assembly involved in synapse maturation	1	1	48.3299	0.0402317	0.128117
GO:0045210	FasL biosynthetic process	1	1	48.3299	0.0402317	0.128117
GO:1901992	positive regulation of mitotic cell cycle phase transition	1	1	48.3299	0.0402317	0.128117
GO:0061110	dense core granule biogenesis	1	1	48.3299	0.0402317	0.128117
GO:0021666	rhombomere 5 formation	1	1	48.3299	0.0402317	0.128117
GO:0071877	regulation of adrenergic receptor signaling pathway	1	1	48.3299	0.0402317	0.128117
GO:0002581	negative regulation of antigen processing and presentation of peptide or polysaccharide antigen via MHC class II	1	1	48.3299	0.0402317	0.128117
GO:0071234	cellular response to phenylalanine	1	1	48.3299	0.0402317	0.128117
GO:2000227	negative regulation of pancreatic A cell differentiation	1	1	48.3299	0.0402317	0.128117
GO:0009444	pyruvate oxidation	1	1	48.3299	0.0402317	0.128117
GO:2000446	regulation of macrophage migration inhibitory factor signaling pathway	1	1	48.3299	0.0402317	0.128117
GO:1904330	positive regulation of myofibroblast contraction	1	1	48.3299	0.0402317	0.128117
GO:0030638	polyketide metabolic process	1	1	48.3299	0.0402317	0.128117
GO:0010477	response to sulfur dioxide	1	1	48.3299	0.0402317	0.128117
GO:1904831	positive regulation of aortic smooth muscle cell differentiation	1	1	48.3299	0.0402317	0.128117
GO:0042628	mating plug formation	1	1	48.3299	0.0402317	0.128117
GO:0061511	centriole elongation	1	1	48.3299	0.0402317	0.128117
GO:1904320	positive regulation of smooth muscle contraction involved in micturition	1	1	48.3299	0.0402317	0.128117
GO:1904346	positive regulation of gastric mucosal blood circulation	1	1	48.3299	0.0402317	0.128117
GO:0072750	cellular response to leptomycin B	1	1	48.3299	0.0402317	0.128117
GO:0021683	cerebellar granular layer morphogenesis	1	1	48.3299	0.0402317	0.128117
GO:0021660	rhombomere 3 formation	1	1	48.3299	0.0402317	0.128117
GO:0048297	negative regulation of isotype switching to IgA isotypes	1	1	48.3299	0.0402317	0.128117
GO:0006679	glucosylceramide biosynthetic process	1	1	48.3299	0.0402317	0.128117
GO:1902362	melanocyte apoptotic process	1	1	48.3299	0.0402317	0.128117
GO:1903392	negative regulation of adherens junction organization	1	1	48.3299	0.0402317	0.128117
GO:1902036	regulation of hematopoietic stem cell differentiation	1	1	48.3299	0.0402317	0.128117
GO:0044029	hypomethylation of CpG island	1	1	48.3299	0.0402317	0.128117
GO:1904428	negative regulation of tubulin deacetylation	1	1	48.3299	0.0402317	0.128117
GO:1904326	negative regulation of circadian sleep/wake cycle, wakefulness	1	1	48.3299	0.0402317	0.128117
GO:0035505	positive regulation of myosin light chain kinase activity	1	1	48.3299	0.0402317	0.128117
GO:0001910	regulation of leukocyte mediated cytotoxicity	1	1	48.3299	0.0402317	0.128117
GO:0031460	glycine betaine transport	1	1	48.3299	0.0402317	0.128117
GO:0090327	negative regulation of locomotion involved in locomotory behavior	1	1	48.3299	0.0402317	0.128117
GO:0061108	seminal vesicle epithelium development	1	1	48.3299	0.0402317	0.128117
GO:0035790	platelet-derived growth factor receptor-alpha signaling pathway	1	1	48.3299	0.0402317	0.128117
GO:0045977	positive regulation of mitotic cell cycle, embryonic	1	1	48.3299	0.0402317	0.128117
GO:1904887	Wnt signalosome assembly	1	1	48.3299	0.0402317	0.128117
GO:0072163	mesonephric epithelium development	1	1	48.3299	0.0402317	0.128117
GO:0002605	negative regulation of dendritic cell antigen processing and presentation	1	1	48.3299	0.0402317	0.128117
GO:1902044	regulation of Fas signaling pathway	1	1	48.3299	0.0402317	0.128117
GO:0030683	evasion or tolerance by virus of host immune response	1	1	48.3299	0.0402317	0.128117
GO:0060821	inactivation of X chromosome by DNA methylation	1	1	48.3299	0.0402317	0.128117
GO:0006608	snRNP protein import into nucleus	1	1	48.3299	0.0402317	0.128117
GO:0007622	rhythmic behavior	1	1	48.3299	0.0402317	0.128117
GO:0018272	protein-pyridoxal-5-phosphate linkage via peptidyl-N6-pyridoxal phosphate-L-lysine	1	1	48.3299	0.0402317	0.128117
GO:0060212	negative regulation of nuclear-transcribed mRNA poly(A) tail shortening	1	1	48.3299	0.0402317	0.128117
GO:0072110	glomerular mesangial cell proliferation	1	1	48.3299	0.0402317	0.128117
GO:1990767	prostaglandin receptor internalization	1	1	48.3299	0.0402317	0.128117
GO:0045623	negative regulation of T-helper cell differentiation	1	1	48.3299	0.0402317	0.128117
GO:0072666	establishment of protein localization to vacuole	1	1	48.3299	0.0402317	0.128117
GO:0044252	negative regulation of multicellular organismal metabolic process	1	1	48.3299	0.0402317	0.128117
GO:0061682	seminal vesicle morphogenesis	1	1	48.3299	0.0402317	0.128117
GO:1900225	regulation of NLRP3 inflammasome complex assembly	1	1	48.3299	0.0402317	0.128117
GO:0002313	mature B cell differentiation involved in immune response	1	1	48.3299	0.0402317	0.128117
GO:0033233	regulation of protein sumoylation	1	1	48.3299	0.0402317	0.128117
GO:0030029	actin filament-based process	1	1	48.3299	0.0402317	0.128117
GO:0010531	activation of JAK1 kinase activity	1	1	48.3299	0.0402317	0.128117
GO:1903125	negative regulation of thioredoxin peroxidase activity by peptidyl-threonine phosphorylation	1	1	48.3299	0.0402317	0.128117
GO:0035581	sequestering of extracellular ligand from receptor	1	1	48.3299	0.0402317	0.128117
GO:0014805	smooth muscle adaptation	1	1	48.3299	0.0402317	0.128117
GO:2000812	regulation of barbed-end actin filament capping	1	1	48.3299	0.0402317	0.128117
GO:0031651	negative regulation of heat generation	1	1	48.3299	0.0402317	0.128117
GO:0060681	branch elongation involved in ureteric bud branching	1	1	48.3299	0.0402317	0.128117
GO:0010557	positive regulation of macromolecule biosynthetic process	1	1	48.3299	0.0402317	0.128117
GO:0042521	negative regulation of tyrosine phosphorylation of Stat4 protein	1	1	48.3299	0.0402317	0.128117
GO:1902443	negative regulation of ripoptosome assembly involved in necroptotic process	1	1	48.3299	0.0402317	0.128117
GO:0045091	regulation of single stranded viral RNA replication via double stranded DNA intermediate	1	1	48.3299	0.0402317	0.128117
GO:0032231	regulation of actin filament bundle assembly	1	1	48.3299	0.0402317	0.128117
GO:1904343	positive regulation of colon smooth muscle contraction	1	1	48.3299	0.0402317	0.128117
GO:2000469	negative regulation of peroxidase activity	1	1	48.3299	0.0402317	0.128117
GO:0061043	regulation of vascular wound healing	1	1	48.3299	0.0402317	0.128117
GO:0072141	renal interstitial fibroblast development	1	1	48.3299	0.0402317	0.128117
GO:0072303	positive regulation of glomerular metanephric mesangial cell proliferation	1	1	48.3299	0.0402317	0.128117
GO:0010754	negative regulation of cGMP-mediated signaling	1	1	48.3299	0.0402317	0.128117
GO:0038097	positive regulation of mast cell activation by Fc-epsilon receptor signaling pathway	1	1	48.3299	0.0402317	0.128117
GO:0070861	regulation of protein exit from endoplasmic reticulum	1	1	48.3299	0.0402317	0.128117
GO:0070429	negative regulation of nucleotide-binding oligomerization domain containing 1 signaling pathway	1	1	48.3299	0.0402317	0.128117
GO:0071357	cellular response to type I interferon	1	1	48.3299	0.0402317	0.128117
GO:0034346	positive regulation of type III interferon production	1	1	48.3299	0.0402317	0.128117
GO:1904325	positive regulation of inhibitory G-protein coupled receptor phosphorylation	1	1	48.3299	0.0402317	0.128117
GO:0051866	general adaptation syndrome	1	1	48.3299	0.0402317	0.128117
GO:2000108	positive regulation of leukocyte apoptotic process	1	1	48.3299	0.0402317	0.128117
GO:0044524	protein sulfhydration	1	1	48.3299	0.0402317	0.128117
GO:1903054	negative regulation of extracellular matrix organization	1	1	48.3299	0.0402317	0.128117
GO:0032355	response to estradiol	117	6	2.47846	0.0408192	0.128117
GO:0006198	cAMP catabolic process	14	2	6.90427	0.0411012	0.128117
GO:0035640	exploration behavior	14	2	6.90427	0.0411012	0.128117
GO:1902043	positive regulation of extrinsic apoptotic signaling pathway via death domain receptors	14	2	6.90427	0.0411012	0.128117
GO:0043122	regulation of I-kappaB kinase/NF-kappaB signaling	14	2	6.90427	0.0411012	0.128117
GO:0061003	positive regulation of dendritic spine morphogenesis	14	2	6.90427	0.0411012	0.128117
GO:0045088	regulation of innate immune response	14	2	6.90427	0.0411012	0.128117
GO:0043537	negative regulation of blood vessel endothelial cell migration	14	2	6.90427	0.0411012	0.128117
GO:0009409	response to cold	35	3	4.14256	0.0419396	0.130082
GO:0050918	positive chemotaxis	35	3	4.14256	0.0419396	0.130082
GO:0007517	muscle organ development	88	5	2.74602	0.0419432	0.130082
GO:0010468	regulation of gene expression	89	5	2.71516	0.0435812	0.133814
GO:2001237	negative regulation of extrinsic apoptotic signaling pathway	36	3	4.02749	0.0447646	0.137266
GO:0070911	global genome nucleotide-excision repair	62	4	3.11806	0.0458325	0.139591
GO:1904659	glucose transmembrane transport	15	2	6.44399	0.045963	0.139591
GO:0051966	regulation of synaptic transmission, glutamatergic	15	2	6.44399	0.045963	0.139591
GO:0019674	NAD metabolic process	15	2	6.44399	0.045963	0.139591
GO:0030818	negative regulation of cAMP biosynthetic process	15	2	6.44399	0.045963	0.139591
GO:0046827	positive regulation of protein export from nucleus	15	2	6.44399	0.045963	0.139591
GO:0030889	negative regulation of B cell proliferation	15	2	6.44399	0.045963	0.139591
GO:0002042	cell migration involved in sprouting angiogenesis	15	2	6.44399	0.045963	0.139591
GO:0030890	positive regulation of B cell proliferation	37	3	3.91864	0.0476815	0.144432
GO:0097192	extrinsic apoptotic signaling pathway in absence of ligand	37	3	3.91864	0.0476815	0.144432
GO:0008360	regulation of cell shape	122	6	2.37688	0.0479061	0.144502
GO:0043433	negative regulation of sequence-specific DNA binding transcription factor activity	63	4	3.06856	0.0479823	0.144502
GO:0043123	positive regulation of I-kappaB kinase/NF-kappaB signaling	154	7	2.19681	0.0480568	0.144502
GO:0031100	organ regeneration	64	4	3.02062	0.0501869	0.149177
GO:0015758	glucose transport	64	4	3.02062	0.0501869	0.149177
GO:0007420	brain development	189	8	2.04571	0.0504225	0.149177
GO:0048536	spleen development	38	3	3.81552	0.0506891	0.149177
GO:0030326	embryonic limb morphogenesis	38	3	3.81552	0.0506891	0.149177
GO:0010613	positive regulation of cardiac muscle hypertrophy	16	2	6.04124	0.0510232	0.149177
GO:0071310	cellular response to organic substance	16	2	6.04124	0.0510232	0.149177
GO:0006402	mRNA catabolic process	16	2	6.04124	0.0510232	0.149177
GO:2001234	negative regulation of apoptotic signaling pathway	16	2	6.04124	0.0510232	0.149177
GO:0061028	establishment of endothelial barrier	16	2	6.04124	0.0510232	0.149177
GO:0006376	mRNA splice site selection	16	2	6.04124	0.0510232	0.149177
GO:0070848	response to growth factor	16	2	6.04124	0.0510232	0.149177
GO:0031668	cellular response to extracellular stimulus	16	2	6.04124	0.0510232	0.149177
GO:0045892	negative regulation of transcription, DNA-templated	479	16	1.61436	0.0512802	0.149177
GO:0007565	female pregnancy	94	5	2.57074	0.0523387	0.150185
GO:0007224	smoothened signaling pathway	65	4	2.97415	0.052446	0.150185
GO:0045668	negative regulation of osteoblast differentiation	39	3	3.71768	0.0537863	0.152089
GO:0007566	embryo implantation	39	3	3.71768	0.0537863	0.152089
GO:1901215	negative regulation of neuron death	39	3	3.71768	0.0537863	0.152089
GO:0021522	spinal cord motor neuron differentiation	17	2	5.68587	0.0562718	0.156453
GO:0051968	positive regulation of synaptic transmission, glutamatergic	17	2	5.68587	0.0562718	0.156453
GO:1902041	regulation of extrinsic apoptotic signaling pathway via death domain receptors	17	2	5.68587	0.0562718	0.156453
GO:0030334	regulation of cell migration	68	4	2.84294	0.0595487	0.157241
GO:0001938	positive regulation of endothelial cell proliferation	68	4	2.84294	0.0595487	0.157241
GO:0033138	positive regulation of peptidyl-serine phosphorylation	68	4	2.84294	0.0595487	0.157241
GO:0061626	pharyngeal arch artery morphogenesis	2	1	24.1649	0.0597349	0.157241
GO:1902823	negative regulation of late endosome to lysosome transport	2	1	24.1649	0.0597349	0.157241
GO:0071226	cellular response to molecule of fungal origin	2	1	24.1649	0.0597349	0.157241
GO:1902626	assembly of large subunit precursor of preribosome	2	1	24.1649	0.0597349	0.157241
GO:0035616	histone H2B conserved C-terminal lysine deubiquitination	2	1	24.1649	0.0597349	0.157241
GO:0070230	positive regulation of lymphocyte apoptotic process	2	1	24.1649	0.0597349	0.157241
GO:0055059	asymmetric neuroblast division	2	1	24.1649	0.0597349	0.157241
GO:0060282	positive regulation of oocyte development	2	1	24.1649	0.0597349	0.157241
GO:0086100	endothelin receptor signaling pathway	2	1	24.1649	0.0597349	0.157241
GO:0034165	positive regulation of toll-like receptor 9 signaling pathway	2	1	24.1649	0.0597349	0.157241
GO:0031104	dendrite regeneration	2	1	24.1649	0.0597349	0.157241
GO:0036270	response to diuretic	2	1	24.1649	0.0597349	0.157241
GO:0010766	negative regulation of sodium ion transport	2	1	24.1649	0.0597349	0.157241
GO:0009756	carbohydrate mediated signaling	2	1	24.1649	0.0597349	0.157241
GO:1902527	positive regulation of protein monoubiquitination	2	1	24.1649	0.0597349	0.157241
GO:0046331	lateral inhibition	2	1	24.1649	0.0597349	0.157241
GO:1904037	positive regulation of epithelial cell apoptotic process	2	1	24.1649	0.0597349	0.157241
GO:0003229	ventricular cardiac muscle tissue development	2	1	24.1649	0.0597349	0.157241
GO:0002711	positive regulation of T cell mediated immunity	2	1	24.1649	0.0597349	0.157241
GO:0001573	ganglioside metabolic process	2	1	24.1649	0.0597349	0.157241
GO:0033363	secretory granule organization	2	1	24.1649	0.0597349	0.157241
GO:0046386	deoxyribose phosphate catabolic process	2	1	24.1649	0.0597349	0.157241
GO:1904694	negative regulation of vascular smooth muscle contraction	2	1	24.1649	0.0597349	0.157241
GO:1903640	negative regulation of gastrin-induced gastric acid secretion	2	1	24.1649	0.0597349	0.157241
GO:0090204	protein localization to nuclear pore	2	1	24.1649	0.0597349	0.157241
GO:0002384	hepatic immune response	2	1	24.1649	0.0597349	0.157241
GO:0015876	acetyl-CoA transport	2	1	24.1649	0.0597349	0.157241
GO:0035710	CD4-positive, alpha-beta T cell activation	2	1	24.1649	0.0597349	0.157241
GO:0090291	negative regulation of osteoclast proliferation	2	1	24.1649	0.0597349	0.157241
GO:0097286	iron ion import	2	1	24.1649	0.0597349	0.157241
GO:0060849	regulation of transcription involved in lymphatic endothelial cell fate commitment	2	1	24.1649	0.0597349	0.157241
GO:0019323	pentose catabolic process	2	1	24.1649	0.0597349	0.157241
GO:0072203	cell proliferation involved in metanephros development	2	1	24.1649	0.0597349	0.157241
GO:1901532	regulation of hematopoietic progenitor cell differentiation	2	1	24.1649	0.0597349	0.157241
GO:1903217	negative regulation of protein processing involved in protein targeting to mitochondrion	2	1	24.1649	0.0597349	0.157241
GO:0021557	oculomotor nerve development	2	1	24.1649	0.0597349	0.157241
GO:0061033	secretion by lung epithelial cell involved in lung growth	2	1	24.1649	0.0597349	0.157241
GO:0048635	negative regulation of muscle organ development	2	1	24.1649	0.0597349	0.157241
GO:0006925	inflammatory cell apoptotic process	2	1	24.1649	0.0597349	0.157241
GO:0071233	cellular response to leucine	2	1	24.1649	0.0597349	0.157241
GO:0043402	glucocorticoid mediated signaling pathway	2	1	24.1649	0.0597349	0.157241
GO:0010519	negative regulation of phospholipase activity	2	1	24.1649	0.0597349	0.157241
GO:0071879	positive regulation of adrenergic receptor signaling pathway	2	1	24.1649	0.0597349	0.157241
GO:0032328	alanine transport	2	1	24.1649	0.0597349	0.157241
GO:0090362	positive regulation of platelet-derived growth factor production	2	1	24.1649	0.0597349	0.157241
GO:0060453	regulation of gastric acid secretion	2	1	24.1649	0.0597349	0.157241
GO:0002329	pre-B cell differentiation	2	1	24.1649	0.0597349	0.157241
GO:0002282	microglial cell activation involved in immune response	2	1	24.1649	0.0597349	0.157241
GO:2000173	negative regulation of branching morphogenesis of a nerve	2	1	24.1649	0.0597349	0.157241
GO:0010710	regulation of collagen catabolic process	2	1	24.1649	0.0597349	0.157241
GO:0097117	guanylate kinase-associated protein clustering	2	1	24.1649	0.0597349	0.157241
GO:0071955	recycling endosome to Golgi transport	2	1	24.1649	0.0597349	0.157241
GO:1902499	positive regulation of protein autoubiquitination	2	1	24.1649	0.0597349	0.157241
GO:0010157	response to chlorate	2	1	24.1649	0.0597349	0.157241
GO:0030832	regulation of actin filament length	2	1	24.1649	0.0597349	0.157241
GO:0042526	positive regulation of tyrosine phosphorylation of Stat6 protein	2	1	24.1649	0.0597349	0.157241
GO:1902523	positive regulation of protein K63-linked ubiquitination	2	1	24.1649	0.0597349	0.157241
GO:0043331	response to dsRNA	2	1	24.1649	0.0597349	0.157241
GO:0016340	calcium-dependent cell-matrix adhesion	2	1	24.1649	0.0597349	0.157241
GO:0021986	habenula development	2	1	24.1649	0.0597349	0.157241
GO:0039535	regulation of RIG-I signaling pathway	2	1	24.1649	0.0597349	0.157241
GO:0019742	pentacyclic triterpenoid metabolic process	2	1	24.1649	0.0597349	0.157241
GO:0002730	regulation of dendritic cell cytokine production	2	1	24.1649	0.0597349	0.157241
GO:0021558	trochlear nerve development	2	1	24.1649	0.0597349	0.157241
GO:0071506	cellular response to mycophenolic acid	2	1	24.1649	0.0597349	0.157241
GO:1902367	negative regulation of Notch signaling pathway involved in somitogenesis	2	1	24.1649	0.0597349	0.157241
GO:0097325	melanocyte proliferation	2	1	24.1649	0.0597349	0.157241
GO:2000349	negative regulation of CD40 signaling pathway	2	1	24.1649	0.0597349	0.157241
GO:0061005	cell differentiation involved in kidney development	2	1	24.1649	0.0597349	0.157241
GO:0036273	response to statin	2	1	24.1649	0.0597349	0.157241
GO:0046167	glycerol-3-phosphate biosynthetic process	2	1	24.1649	0.0597349	0.157241
GO:1902033	regulation of hematopoietic stem cell proliferation	2	1	24.1649	0.0597349	0.157241
GO:0045586	regulation of gamma-delta T cell differentiation	2	1	24.1649	0.0597349	0.157241
GO:0006499	N-terminal protein myristoylation	2	1	24.1649	0.0597349	0.157241
GO:0002635	negative regulation of germinal center formation	2	1	24.1649	0.0597349	0.157241
GO:0031393	negative regulation of prostaglandin biosynthetic process	2	1	24.1649	0.0597349	0.157241
GO:1902524	positive regulation of protein K48-linked ubiquitination	2	1	24.1649	0.0597349	0.157241
GO:0072573	tolerance induction to lipopolysaccharide	2	1	24.1649	0.0597349	0.157241
GO:0010868	negative regulation of triglyceride biosynthetic process	2	1	24.1649	0.0597349	0.157241
GO:0051917	regulation of fibrinolysis	2	1	24.1649	0.0597349	0.157241
GO:0000154	rRNA modification	2	1	24.1649	0.0597349	0.157241
GO:0002312	B cell activation involved in immune response	2	1	24.1649	0.0597349	0.157241
GO:1902692	regulation of neuroblast proliferation	2	1	24.1649	0.0597349	0.157241
GO:0097049	motor neuron apoptotic process	2	1	24.1649	0.0597349	0.157241
GO:0006953	acute-phase response	41	3	3.53633	0.0602448	0.157868
GO:0034613	cellular protein localization	41	3	3.53633	0.0602448	0.157868
GO:0051262	protein tetramerization	41	3	3.53633	0.0602448	0.157868
GO:0042127	regulation of cell proliferation	163	7	2.07552	0.0607509	0.158777
GO:0021537	telencephalon development	18	2	5.36999	0.0616988	0.159698
GO:0006479	protein methylation	18	2	5.36999	0.0616988	0.159698
GO:0042832	defense response to protozoan	18	2	5.36999	0.0616988	0.159698
GO:0008045	motor neuron axon guidance	18	2	5.36999	0.0616988	0.159698
GO:0043536	positive regulation of blood vessel endothelial cell migration	18	2	5.36999	0.0616988	0.159698
GO:0061512	protein localization to cilium	18	2	5.36999	0.0616988	0.159698
GO:0006261	DNA-dependent DNA replication	18	2	5.36999	0.0616988	0.159698
GO:0031589	cell-substrate adhesion	18	2	5.36999	0.0616988	0.159698
GO:0034614	cellular response to reactive oxygen species	18	2	5.36999	0.0616988	0.159698
GO:0001574	ganglioside biosynthetic process	18	2	5.36999	0.0616988	0.159698
GO:0060716	labyrinthine layer blood vessel development	18	2	5.36999	0.0616988	0.159698
GO:0030033	microvillus assembly	18	2	5.36999	0.0616988	0.159698
GO:0032870	cellular response to hormone stimulus	42	3	3.45214	0.0636033	0.164079
GO:0031397	negative regulation of protein ubiquitination	42	3	3.45214	0.0636033	0.164079
GO:0007179	transforming growth factor beta receptor signaling pathway	133	6	2.1803	0.0660101	0.16966
GO:0045879	negative regulation of smoothened signaling pathway	19	2	5.08736	0.0672949	0.171383
GO:0010939	regulation of necrotic cell death	19	2	5.08736	0.0672949	0.171383
GO:0042276	error-prone translesion synthesis	19	2	5.08736	0.0672949	0.171383
GO:0006883	cellular sodium ion homeostasis	19	2	5.08736	0.0672949	0.171383
GO:0043153	entrainment of circadian clock by photoperiod	19	2	5.08736	0.0672949	0.171383
GO:0009416	response to light stimulus	19	2	5.08736	0.0672949	0.171383
GO:0006283	transcription-coupled nucleotide-excision repair	73	4	2.64821	0.0724535	0.182192
GO:0070542	response to fatty acid	20	2	4.83299	0.073051	0.182641
GO:0046688	response to copper ion	20	2	4.83299	0.073051	0.182641
GO:0032733	positive regulation of interleukin-10 production	20	2	4.83299	0.073051	0.182641
GO:0097503	sialylation	20	2	4.83299	0.073051	0.182641
GO:0097296	activation of cysteine-type endopeptidase activity involved in apoptotic signaling pathway	20	2	4.83299	0.073051	0.182641
GO:0019722	calcium-mediated signaling	45	3	3.22199	0.0741796	0.185263
GO:0006488	dolichol-linked oligosaccharide biosynthetic process	74	4	2.61243	0.0751913	0.185879
GO:0035176	social behavior	46	3	3.15195	0.077867	0.185879
GO:0010506	regulation of autophagy	46	3	3.15195	0.077867	0.185879
GO:0043154	negative regulation of cysteine-type endopeptidase activity involved in apoptotic process	75	4	2.57759	0.0779804	0.185879
GO:1903288	positive regulation of potassium ion import	3	1	16.11	0.0788408	0.185879
GO:0045188	regulation of circadian sleep/wake cycle, non-REM sleep	3	1	16.11	0.0788408	0.185879
GO:0071464	cellular response to hydrostatic pressure	3	1	16.11	0.0788408	0.185879
GO:0033092	positive regulation of immature T cell proliferation in thymus	3	1	16.11	0.0788408	0.185879
GO:0032487	regulation of Rap protein signal transduction	3	1	16.11	0.0788408	0.185879
GO:0061309	cardiac neural crest cell development involved in outflow tract morphogenesis	3	1	16.11	0.0788408	0.185879
GO:0060159	regulation of dopamine receptor signaling pathway	3	1	16.11	0.0788408	0.185879
GO:0051097	negative regulation of helicase activity	3	1	16.11	0.0788408	0.185879
GO:0061009	common bile duct development	3	1	16.11	0.0788408	0.185879
GO:1902803	regulation of synaptic vesicle transport	3	1	16.11	0.0788408	0.185879
GO:0061055	myotome development	3	1	16.11	0.0788408	0.185879
GO:0070424	regulation of nucleotide-binding oligomerization domain containing signaling pathway	3	1	16.11	0.0788408	0.185879
GO:1900625	positive regulation of monocyte aggregation	3	1	16.11	0.0788408	0.185879
GO:0060164	regulation of timing of neuron differentiation	3	1	16.11	0.0788408	0.185879
GO:0001781	neutrophil apoptotic process	3	1	16.11	0.0788408	0.185879
GO:2000544	regulation of endothelial cell chemotaxis to fibroblast growth factor	3	1	16.11	0.0788408	0.185879
GO:0018242	protein O-linked glycosylation via serine	3	1	16.11	0.0788408	0.185879
GO:0070487	monocyte aggregation	3	1	16.11	0.0788408	0.185879
GO:0035633	maintenance of blood-brain barrier	3	1	16.11	0.0788408	0.185879
GO:0097091	synaptic vesicle clustering	3	1	16.11	0.0788408	0.185879
GO:1903215	negative regulation of protein targeting to mitochondrion	3	1	16.11	0.0788408	0.185879
GO:0060675	ureteric bud morphogenesis	3	1	16.11	0.0788408	0.185879
GO:0070358	actin polymerization-dependent cell motility	3	1	16.11	0.0788408	0.185879
GO:0046058	cAMP metabolic process	3	1	16.11	0.0788408	0.185879
GO:0060830	ciliary receptor clustering involved in smoothened signaling pathway	3	1	16.11	0.0788408	0.185879
GO:0034121	regulation of toll-like receptor signaling pathway	3	1	16.11	0.0788408	0.185879
GO:0061470	T follicular helper cell differentiation	3	1	16.11	0.0788408	0.185879
GO:0060544	regulation of necroptotic process	3	1	16.11	0.0788408	0.185879
GO:0070294	renal sodium ion absorption	3	1	16.11	0.0788408	0.185879
GO:0034140	negative regulation of toll-like receptor 3 signaling pathway	3	1	16.11	0.0788408	0.185879
GO:0048144	fibroblast proliferation	3	1	16.11	0.0788408	0.185879
GO:0072049	comma-shaped body morphogenesis	3	1	16.11	0.0788408	0.185879
GO:0070814	hydrogen sulfide biosynthetic process	3	1	16.11	0.0788408	0.185879
GO:0039529	RIG-I signaling pathway	3	1	16.11	0.0788408	0.185879
GO:0033003	regulation of mast cell activation	3	1	16.11	0.0788408	0.185879
GO:0030241	skeletal muscle myosin thick filament assembly	3	1	16.11	0.0788408	0.185879
GO:0014041	regulation of neuron maturation	3	1	16.11	0.0788408	0.185879
GO:0002439	chronic inflammatory response to antigenic stimulus	3	1	16.11	0.0788408	0.185879
GO:0060559	positive regulation of calcidiol 1-monooxygenase activity	3	1	16.11	0.0788408	0.185879
GO:0032227	negative regulation of synaptic transmission, dopaminergic	3	1	16.11	0.0788408	0.185879
GO:1900138	negative regulation of phospholipase A2 activity	3	1	16.11	0.0788408	0.185879
GO:0070537	histone H2A K63-linked deubiquitination	3	1	16.11	0.0788408	0.185879
GO:2000974	negative regulation of pro-B cell differentiation	3	1	16.11	0.0788408	0.185879
GO:1902617	response to fluoride	3	1	16.11	0.0788408	0.185879
GO:2001027	negative regulation of endothelial cell chemotaxis	3	1	16.11	0.0788408	0.185879
GO:2000116	regulation of cysteine-type endopeptidase activity	3	1	16.11	0.0788408	0.185879
GO:0070433	negative regulation of nucleotide-binding oligomerization domain containing 2 signaling pathway	3	1	16.11	0.0788408	0.185879
GO:0002366	leukocyte activation involved in immune response	3	1	16.11	0.0788408	0.185879
GO:2000051	negative regulation of non-canonical Wnt signaling pathway	3	1	16.11	0.0788408	0.185879
GO:0002291	T cell activation via T cell receptor contact with antigen bound to MHC molecule on antigen presenting cell	3	1	16.11	0.0788408	0.185879
GO:0045916	negative regulation of complement activation	3	1	16.11	0.0788408	0.185879
GO:0045123	cellular extravasation	3	1	16.11	0.0788408	0.185879
GO:0060161	positive regulation of dopamine receptor signaling pathway	3	1	16.11	0.0788408	0.185879
GO:0022028	tangential migration from the subventricular zone to the olfactory bulb	3	1	16.11	0.0788408	0.185879
GO:0072277	metanephric glomerular capillary formation	3	1	16.11	0.0788408	0.185879
GO:1903208	negative regulation of hydrogen peroxide-induced neuron death	3	1	16.11	0.0788408	0.185879
GO:0002693	positive regulation of cellular extravasation	3	1	16.11	0.0788408	0.185879
GO:0033512	L-lysine catabolic process to acetyl-CoA via saccharopine	3	1	16.11	0.0788408	0.185879
GO:1900020	positive regulation of protein kinase C activity	3	1	16.11	0.0788408	0.185879
GO:0009447	putrescine catabolic process	3	1	16.11	0.0788408	0.185879
GO:0048769	sarcomerogenesis	3	1	16.11	0.0788408	0.185879
GO:0007343	egg activation	3	1	16.11	0.0788408	0.185879
GO:0035910	ascending aorta morphogenesis	3	1	16.11	0.0788408	0.185879
GO:0019724	B cell mediated immunity	3	1	16.11	0.0788408	0.185879
GO:0044406	adhesion of symbiont to host	3	1	16.11	0.0788408	0.185879
GO:0032765	positive regulation of mast cell cytokine production	3	1	16.11	0.0788408	0.185879
GO:0035751	regulation of lysosomal lumen pH	3	1	16.11	0.0788408	0.185879
GO:1904262	negative regulation of TORC1 signaling	3	1	16.11	0.0788408	0.185879
GO:0034136	negative regulation of toll-like receptor 2 signaling pathway	3	1	16.11	0.0788408	0.185879
GO:0045608	negative regulation of auditory receptor cell differentiation	3	1	16.11	0.0788408	0.185879
GO:0070434	positive regulation of nucleotide-binding oligomerization domain containing 2 signaling pathway	3	1	16.11	0.0788408	0.185879
GO:0042668	auditory receptor cell fate determination	3	1	16.11	0.0788408	0.185879
GO:0009957	epidermal cell fate specification	3	1	16.11	0.0788408	0.185879
GO:0019344	cysteine biosynthetic process	3	1	16.11	0.0788408	0.185879
GO:0071596	ubiquitin-dependent protein catabolic process via the N-end rule pathway	3	1	16.11	0.0788408	0.185879
GO:0060005	vestibular reflex	3	1	16.11	0.0788408	0.185879
GO:0034111	negative regulation of homotypic cell-cell adhesion	3	1	16.11	0.0788408	0.185879
GO:0010829	negative regulation of glucose transport	3	1	16.11	0.0788408	0.185879
GO:0001922	B-1 B cell homeostasis	3	1	16.11	0.0788408	0.185879
GO:0038091	positive regulation of cell proliferation by VEGF-activated platelet derived growth factor receptor signaling pathway	3	1	16.11	0.0788408	0.185879
GO:0035284	brain segmentation	3	1	16.11	0.0788408	0.185879
GO:0032613	interleukin-10 production	3	1	16.11	0.0788408	0.185879
GO:0032275	luteinizing hormone secretion	3	1	16.11	0.0788408	0.185879
GO:0032596	protein transport into membrane raft	3	1	16.11	0.0788408	0.185879
GO:0039530	MDA-5 signaling pathway	3	1	16.11	0.0788408	0.185879
GO:0072050	S-shaped body morphogenesis	3	1	16.11	0.0788408	0.185879
GO:0002486	antigen processing and presentation of endogenous peptide antigen via MHC class I via ER pathway, TAP-independent	3	1	16.11	0.0788408	0.185879
GO:0002457	T cell antigen processing and presentation	3	1	16.11	0.0788408	0.185879
GO:0010025	wax biosynthetic process	3	1	16.11	0.0788408	0.185879
GO:0090271	positive regulation of fibroblast growth factor production	3	1	16.11	0.0788408	0.185879
GO:0060368	regulation of Fc receptor mediated stimulatory signaling pathway	3	1	16.11	0.0788408	0.185879
GO:2000366	positive regulation of STAT protein import into nucleus	3	1	16.11	0.0788408	0.185879
GO:0002005	angiotensin catabolic process in blood	3	1	16.11	0.0788408	0.185879
GO:0002820	negative regulation of adaptive immune response	3	1	16.11	0.0788408	0.185879
GO:2000172	regulation of branching morphogenesis of a nerve	3	1	16.11	0.0788408	0.185879
GO:0001552	ovarian follicle atresia	3	1	16.11	0.0788408	0.185879
GO:0030835	negative regulation of actin filament depolymerization	3	1	16.11	0.0788408	0.185879
GO:0072282	metanephric nephron tubule morphogenesis	3	1	16.11	0.0788408	0.185879
GO:0015827	tryptophan transport	3	1	16.11	0.0788408	0.185879
GO:0097116	gephyrin clustering involved in postsynaptic density assembly	3	1	16.11	0.0788408	0.185879
GO:0045079	negative regulation of chemokine biosynthetic process	3	1	16.11	0.0788408	0.185879
GO:0034499	late endosome to Golgi transport	3	1	16.11	0.0788408	0.185879
GO:0010751	negative regulation of nitric oxide mediated signal transduction	3	1	16.11	0.0788408	0.185879
GO:1903170	negative regulation of calcium ion transmembrane transport	3	1	16.11	0.0788408	0.185879
GO:0060741	prostate gland stromal morphogenesis	3	1	16.11	0.0788408	0.185879
GO:2000074	regulation of type B pancreatic cell development	3	1	16.11	0.0788408	0.185879
GO:0019343	cysteine biosynthetic process via cystathionine	3	1	16.11	0.0788408	0.185879
GO:0001660	fever generation	3	1	16.11	0.0788408	0.185879
GO:0051443	positive regulation of ubiquitin-protein transferase activity	21	2	4.60285	0.0789581	0.185879
GO:0033280	response to vitamin D	21	2	4.60285	0.0789581	0.185879
GO:0050775	positive regulation of dendrite morphogenesis	21	2	4.60285	0.0789581	0.185879
GO:0046427	positive regulation of JAK-STAT cascade	21	2	4.60285	0.0789581	0.185879
GO:0045672	positive regulation of osteoclast differentiation	21	2	4.60285	0.0789581	0.185879
GO:0030316	osteoclast differentiation	21	2	4.60285	0.0789581	0.185879
GO:2001243	negative regulation of intrinsic apoptotic signaling pathway	21	2	4.60285	0.0789581	0.185879
GO:0046697	decidualization	21	2	4.60285	0.0789581	0.185879
GO:0045766	positive regulation of angiogenesis	107	5	2.25841	0.0795271	0.186903
GO:0007519	skeletal muscle tissue development	47	3	3.08489	0.0816327	0.190144
GO:0032526	response to retinoic acid	47	3	3.08489	0.0816327	0.190144
GO:0070936	protein K48-linked ubiquitination	47	3	3.08489	0.0816327	0.190144
GO:0060048	cardiac muscle contraction	47	3	3.08489	0.0816327	0.190144
GO:0001701	in utero embryonic development	176	7	1.92221	0.0823754	0.191404
GO:0006607	NLS-bearing protein import into nucleus	22	2	4.39363	0.0850077	0.194933
GO:0045737	positive regulation of cyclin-dependent protein serine/threonine kinase activity	22	2	4.39363	0.0850077	0.194933
GO:0045736	negative regulation of cyclin-dependent protein serine/threonine kinase activity	22	2	4.39363	0.0850077	0.194933
GO:0097300	programmed necrotic cell death	22	2	4.39363	0.0850077	0.194933
GO:0071277	cellular response to calcium ion	48	3	3.02062	0.0854752	0.195673
GO:0030509	BMP signaling pathway	78	4	2.47846	0.0866505	0.197585
GO:0006814	sodium ion transport	78	4	2.47846	0.0866505	0.197585
GO:0007050	cell cycle arrest	144	6	2.01375	0.0875815	0.198979
GO:0045087	innate immune response	885	25	1.36525	0.0885748	0.198979
GO:0008344	adult locomotory behavior	49	3	2.95897	0.0893929	0.199915
GO:1902042	negative regulation of extrinsic apoptotic signaling pathway via death domain receptors	23	2	4.2026	0.0911915	0.203286
GO:0006306	DNA methylation	23	2	4.2026	0.0911915	0.203286
GO:0045880	positive regulation of smoothened signaling pathway	23	2	4.2026	0.0911915	0.203286
GO:0034660	ncRNA metabolic process	23	2	4.2026	0.0911915	0.203286
GO:0051384	response to glucocorticoid	81	4	2.38666	0.0957639	0.20702
GO:0051897	positive regulation of protein kinase B signaling	81	4	2.38666	0.0957639	0.20702
GO:0071222	cellular response to lipopolysaccharide	114	5	2.11973	0.0967473	0.20702
GO:0010923	negative regulation of phosphatase activity	51	3	2.84294	0.097447	0.20702
GO:0006297	nucleotide-excision repair, DNA gap filling	24	2	4.02749	0.0975016	0.20702
GO:0002040	sprouting angiogenesis	24	2	4.02749	0.0975016	0.20702
GO:0035924	cellular response to vascular endothelial growth factor stimulus	24	2	4.02749	0.0975016	0.20702
GO:0002092	positive regulation of receptor internalization	24	2	4.02749	0.0975016	0.20702
GO:0070370	cellular heat acclimation	4	1	12.0825	0.0975575	0.20702
GO:0045356	positive regulation of interferon-alpha biosynthetic process	4	1	12.0825	0.0975575	0.20702
GO:0050974	detection of mechanical stimulus involved in sensory perception	4	1	12.0825	0.0975575	0.20702
GO:2000821	regulation of grooming behavior	4	1	12.0825	0.0975575	0.20702
GO:0035995	detection of muscle stretch	4	1	12.0825	0.0975575	0.20702
GO:2000391	positive regulation of neutrophil extravasation	4	1	12.0825	0.0975575	0.20702
GO:0050689	negative regulation of defense response to virus by host	4	1	12.0825	0.0975575	0.20702
GO:0002677	negative regulation of chronic inflammatory response	4	1	12.0825	0.0975575	0.20702
GO:0010961	cellular magnesium ion homeostasis	4	1	12.0825	0.0975575	0.20702
GO:0018243	protein O-linked glycosylation via threonine	4	1	12.0825	0.0975575	0.20702
GO:0019346	transsulfuration	4	1	12.0825	0.0975575	0.20702
GO:0090662	ATP hydrolysis coupled transmembrane transport	4	1	12.0825	0.0975575	0.20702
GO:0043009	chordate embryonic development	4	1	12.0825	0.0975575	0.20702
GO:0021861	forebrain radial glial cell differentiation	4	1	12.0825	0.0975575	0.20702
GO:0035522	monoubiquitinated histone H2A deubiquitination	4	1	12.0825	0.0975575	0.20702
GO:0001821	histamine secretion	4	1	12.0825	0.0975575	0.20702
GO:0006659	phosphatidylserine biosynthetic process	4	1	12.0825	0.0975575	0.20702
GO:0014051	gamma-aminobutyric acid secretion	4	1	12.0825	0.0975575	0.20702
GO:0021871	forebrain regionalization	4	1	12.0825	0.0975575	0.20702
GO:0046898	response to cycloheximide	4	1	12.0825	0.0975575	0.20702
GO:0033687	osteoblast proliferation	4	1	12.0825	0.0975575	0.20702
GO:0003266	regulation of secondary heart field cardioblast proliferation	4	1	12.0825	0.0975575	0.20702
GO:0071218	cellular response to misfolded protein	4	1	12.0825	0.0975575	0.20702
GO:1903278	positive regulation of sodium ion export from cell	4	1	12.0825	0.0975575	0.20702
GO:0042471	ear morphogenesis	4	1	12.0825	0.0975575	0.20702
GO:0042998	positive regulation of Golgi to plasma membrane protein transport	4	1	12.0825	0.0975575	0.20702
GO:0022615	protein to membrane docking	4	1	12.0825	0.0975575	0.20702
GO:0010748	negative regulation of plasma membrane long-chain fatty acid transport	4	1	12.0825	0.0975575	0.20702
GO:0048659	smooth muscle cell proliferation	4	1	12.0825	0.0975575	0.20702
GO:0090140	regulation of mitochondrial fission	4	1	12.0825	0.0975575	0.20702
GO:0038028	insulin receptor signaling pathway via phosphatidylinositol 3-kinase	4	1	12.0825	0.0975575	0.20702
GO:0051900	regulation of mitochondrial depolarization	4	1	12.0825	0.0975575	0.20702
GO:0070164	negative regulation of adiponectin secretion	4	1	12.0825	0.0975575	0.20702
GO:1900245	positive regulation of MDA-5 signaling pathway	4	1	12.0825	0.0975575	0.20702
GO:0006990	positive regulation of transcription from RNA polymerase II promoter involved in unfolded protein response	4	1	12.0825	0.0975575	0.20702
GO:0060708	spongiotrophoblast differentiation	4	1	12.0825	0.0975575	0.20702
GO:0043652	engulfment of apoptotic cell	4	1	12.0825	0.0975575	0.20702
GO:0051984	positive regulation of chromosome segregation	4	1	12.0825	0.0975575	0.20702
GO:0070816	phosphorylation of RNA polymerase II C-terminal domain	4	1	12.0825	0.0975575	0.20702
GO:2000117	negative regulation of cysteine-type endopeptidase activity	4	1	12.0825	0.0975575	0.20702
GO:0042036	negative regulation of cytokine biosynthetic process	4	1	12.0825	0.0975575	0.20702
GO:2000676	positive regulation of type B pancreatic cell apoptotic process	4	1	12.0825	0.0975575	0.20702
GO:2000653	regulation of genetic imprinting	4	1	12.0825	0.0975575	0.20702
GO:0010463	mesenchymal cell proliferation	4	1	12.0825	0.0975575	0.20702
GO:0032815	negative regulation of natural killer cell activation	4	1	12.0825	0.0975575	0.20702
GO:0010574	regulation of vascular endothelial growth factor production	4	1	12.0825	0.0975575	0.20702
GO:1901031	regulation of response to reactive oxygen species	4	1	12.0825	0.0975575	0.20702
GO:0030730	sequestering of triglyceride	4	1	12.0825	0.0975575	0.20702
GO:0006534	cysteine metabolic process	4	1	12.0825	0.0975575	0.20702
GO:0097118	neuroligin clustering involved in postsynaptic membrane assembly	4	1	12.0825	0.0975575	0.20702
GO:0071034	CUT catabolic process	4	1	12.0825	0.0975575	0.20702
GO:0046475	glycerophospholipid catabolic process	4	1	12.0825	0.0975575	0.20702
GO:0060665	regulation of branching involved in salivary gland morphogenesis by mesenchymal-epithelial signaling	4	1	12.0825	0.0975575	0.20702
GO:0014827	intestine smooth muscle contraction	4	1	12.0825	0.0975575	0.20702
GO:1902115	regulation of organelle assembly	4	1	12.0825	0.0975575	0.20702
GO:0045833	negative regulation of lipid metabolic process	4	1	12.0825	0.0975575	0.20702
GO:0021575	hindbrain morphogenesis	4	1	12.0825	0.0975575	0.20702
GO:0044262	cellular carbohydrate metabolic process	4	1	12.0825	0.0975575	0.20702
GO:0060244	negative regulation of cell proliferation involved in contact inhibition	4	1	12.0825	0.0975575	0.20702
GO:0051490	negative regulation of filopodium assembly	4	1	12.0825	0.0975575	0.20702
GO:0021555	midbrain-hindbrain boundary morphogenesis	4	1	12.0825	0.0975575	0.20702
GO:0010998	regulation of translational initiation by eIF2 alpha phosphorylation	4	1	12.0825	0.0975575	0.20702
GO:0008105	asymmetric protein localization	4	1	12.0825	0.0975575	0.20702
GO:2000741	positive regulation of mesenchymal stem cell differentiation	4	1	12.0825	0.0975575	0.20702
GO:0071947	protein deubiquitination involved in ubiquitin-dependent protein catabolic process	4	1	12.0825	0.0975575	0.20702
GO:0090403	oxidative stress-induced premature senescence	4	1	12.0825	0.0975575	0.20702
GO:0045901	positive regulation of translational elongation	4	1	12.0825	0.0975575	0.20702
GO:0043084	penile erection	4	1	12.0825	0.0975575	0.20702
GO:2001179	regulation of interleukin-10 secretion	4	1	12.0825	0.0975575	0.20702
GO:0010716	negative regulation of extracellular matrix disassembly	4	1	12.0825	0.0975575	0.20702
GO:0045619	regulation of lymphocyte differentiation	4	1	12.0825	0.0975575	0.20702
GO:0035404	histone-serine phosphorylation	4	1	12.0825	0.0975575	0.20702
GO:0070262	peptidyl-serine dephosphorylation	4	1	12.0825	0.0975575	0.20702
GO:0045986	negative regulation of smooth muscle contraction	4	1	12.0825	0.0975575	0.20702
GO:0009408	response to heat	52	3	2.78826	0.10158	0.213349
GO:0030097	hemopoiesis	52	3	2.78826	0.10158	0.213349
GO:0046718	viral entry into host cell	83	4	2.32915	0.102078	0.214137
GO:0051017	actin filament bundle assembly	25	2	3.86639	0.10393	0.216848
GO:0002437	inflammatory response to antigenic stimulus	25	2	3.86639	0.10393	0.216848
GO:0009311	oligosaccharide metabolic process	25	2	3.86639	0.10393	0.216848
GO:0051602	response to electrical stimulus	25	2	3.86639	0.10393	0.216848
GO:0032091	negative regulation of protein binding	53	3	2.73565	0.105781	0.220512
GO:0008286	insulin receptor signaling pathway	301	10	1.60564	0.107267	0.222943
GO:0050731	positive regulation of peptidyl-tyrosine phosphorylation	85	4	2.27435	0.108577	0.225397
GO:0010212	response to ionizing radiation	54	3	2.68499	0.11005	0.22825
GO:0010575	positive regulation of vascular endothelial growth factor production	26	2	3.71768	0.11047	0.228425
GO:0007159	leukocyte cell-cell adhesion	26	2	3.71768	0.11047	0.228425
GO:0030534	adult behavior	26	2	3.71768	0.11047	0.228425
GO:0000245	spliceosomal complex assembly	26	2	3.71768	0.11047	0.228425
GO:0006767	water-soluble vitamin metabolic process	86	4	2.2479	0.111894	0.228425
GO:0007264	small GTPase mediated signal transduction	706	20	1.36912	0.11338	0.228425
GO:0000288	nuclear-transcribed mRNA catabolic process, deadenylation-dependent decay	55	3	2.63618	0.114382	0.228425
GO:0050680	negative regulation of epithelial cell proliferation	55	3	2.63618	0.114382	0.228425
GO:0001889	liver development	87	4	2.22206	0.115256	0.228425
GO:0009636	response to toxic substance	87	4	2.22206	0.115256	0.228425
GO:0010629	negative regulation of gene expression	121	5	1.9971	0.115678	0.228425
GO:1903912	negative regulation of endoplasmic reticulum stress-induced eIF2 alpha phosphorylation	5	1	9.66598	0.115893	0.228425
GO:1990592	protein K69-linked ufmylation	5	1	9.66598	0.115893	0.228425
GO:0048254	snoRNA localization	5	1	9.66598	0.115893	0.228425
GO:0030240	skeletal muscle thin filament assembly	5	1	9.66598	0.115893	0.228425
GO:1901222	regulation of NIK/NF-kappaB signaling	5	1	9.66598	0.115893	0.228425
GO:0043949	regulation of cAMP-mediated signaling	5	1	9.66598	0.115893	0.228425
GO:0097084	vascular smooth muscle cell development	5	1	9.66598	0.115893	0.228425
GO:0090238	positive regulation of arachidonic acid secretion	5	1	9.66598	0.115893	0.228425
GO:0055123	digestive system development	5	1	9.66598	0.115893	0.228425
GO:0035336	long-chain fatty-acyl-CoA metabolic process	5	1	9.66598	0.115893	0.228425
GO:0046813	receptor-mediated virion attachment to host cell	5	1	9.66598	0.115893	0.228425
GO:1904948	midbrain dopaminergic neuron differentiation	5	1	9.66598	0.115893	0.228425
GO:0050920	regulation of chemotaxis	5	1	9.66598	0.115893	0.228425
GO:0071864	positive regulation of cell proliferation in bone marrow	5	1	9.66598	0.115893	0.228425
GO:0072540	T-helper 17 cell lineage commitment	5	1	9.66598	0.115893	0.228425
GO:0032494	response to peptidoglycan	5	1	9.66598	0.115893	0.228425
GO:0016101	diterpenoid metabolic process	5	1	9.66598	0.115893	0.228425
GO:0014832	urinary bladder smooth muscle contraction	5	1	9.66598	0.115893	0.228425
GO:0034773	histone H4-K20 trimethylation	5	1	9.66598	0.115893	0.228425
GO:0035726	common myeloid progenitor cell proliferation	5	1	9.66598	0.115893	0.228425
GO:2000002	negative regulation of DNA damage checkpoint	5	1	9.66598	0.115893	0.228425
GO:0050856	regulation of T cell receptor signaling pathway	5	1	9.66598	0.115893	0.228425
GO:0060613	fat pad development	5	1	9.66598	0.115893	0.228425
GO:0060603	mammary gland duct morphogenesis	5	1	9.66598	0.115893	0.228425
GO:0051223	regulation of protein transport	5	1	9.66598	0.115893	0.228425
GO:0032611	interleukin-1 beta production	5	1	9.66598	0.115893	0.228425
GO:2000253	positive regulation of feeding behavior	5	1	9.66598	0.115893	0.228425
GO:0071639	positive regulation of monocyte chemotactic protein-1 production	5	1	9.66598	0.115893	0.228425
GO:2001268	negative regulation of cysteine-type endopeptidase activity involved in apoptotic signaling pathway	5	1	9.66598	0.115893	0.228425
GO:0002862	negative regulation of inflammatory response to antigenic stimulus	5	1	9.66598	0.115893	0.228425
GO:1902966	positive regulation of protein localization to early endosome	5	1	9.66598	0.115893	0.228425
GO:0090207	regulation of triglyceride metabolic process	5	1	9.66598	0.115893	0.228425
GO:0008063	Toll signaling pathway	5	1	9.66598	0.115893	0.228425
GO:0042634	regulation of hair cycle	5	1	9.66598	0.115893	0.228425
GO:0010891	negative regulation of sequestering of triglyceride	5	1	9.66598	0.115893	0.228425
GO:0034123	positive regulation of toll-like receptor signaling pathway	5	1	9.66598	0.115893	0.228425
GO:0097114	NMDA glutamate receptor clustering	5	1	9.66598	0.115893	0.228425
GO:0034184	positive regulation of maintenance of mitotic sister chromatid cohesion	5	1	9.66598	0.115893	0.228425
GO:0007262	STAT protein import into nucleus	5	1	9.66598	0.115893	0.228425
GO:0090184	positive regulation of kidney development	5	1	9.66598	0.115893	0.228425
GO:0008611	ether lipid biosynthetic process	5	1	9.66598	0.115893	0.228425
GO:0035520	monoubiquitinated protein deubiquitination	5	1	9.66598	0.115893	0.228425
GO:0071447	cellular response to hydroperoxide	5	1	9.66598	0.115893	0.228425
GO:0032673	regulation of interleukin-4 production	5	1	9.66598	0.115893	0.228425
GO:0010830	regulation of myotube differentiation	5	1	9.66598	0.115893	0.228425
GO:0009648	photoperiodism	5	1	9.66598	0.115893	0.228425
GO:0036336	dendritic cell migration	5	1	9.66598	0.115893	0.228425
GO:0090527	actin filament reorganization	5	1	9.66598	0.115893	0.228425
GO:0010894	negative regulation of steroid biosynthetic process	5	1	9.66598	0.115893	0.228425
GO:0071504	cellular response to heparin	5	1	9.66598	0.115893	0.228425
GO:0040020	regulation of meiotic nuclear division	5	1	9.66598	0.115893	0.228425
GO:0022614	membrane to membrane docking	5	1	9.66598	0.115893	0.228425
GO:0042482	positive regulation of odontogenesis	5	1	9.66598	0.115893	0.228425
GO:0050996	positive regulation of lipid catabolic process	5	1	9.66598	0.115893	0.228425
GO:0048505	regulation of timing of cell differentiation	5	1	9.66598	0.115893	0.228425
GO:2000675	negative regulation of type B pancreatic cell apoptotic process	5	1	9.66598	0.115893	0.228425
GO:0002503	peptide antigen assembly with MHC class II protein complex	5	1	9.66598	0.115893	0.228425
GO:0002260	lymphocyte homeostasis	5	1	9.66598	0.115893	0.228425
GO:0040012	regulation of locomotion	5	1	9.66598	0.115893	0.228425
GO:0019060	intracellular transport of viral protein in host cell	5	1	9.66598	0.115893	0.228425
GO:0010828	positive regulation of glucose transport	5	1	9.66598	0.115893	0.228425
GO:0045637	regulation of myeloid cell differentiation	5	1	9.66598	0.115893	0.228425
GO:0036124	histone H3-K9 trimethylation	5	1	9.66598	0.115893	0.228425
GO:1903898	negative regulation of PERK-mediated unfolded protein response	5	1	9.66598	0.115893	0.228425
GO:0014037	Schwann cell differentiation	5	1	9.66598	0.115893	0.228425
GO:0071279	cellular response to cobalt ion	5	1	9.66598	0.115893	0.228425
GO:0045542	positive regulation of cholesterol biosynthetic process	5	1	9.66598	0.115893	0.228425
GO:0071569	protein ufmylation	5	1	9.66598	0.115893	0.228425
GO:0010991	negative regulation of SMAD protein complex assembly	5	1	9.66598	0.115893	0.228425
GO:2000553	positive regulation of T-helper 2 cell cytokine production	5	1	9.66598	0.115893	0.228425
GO:0070201	regulation of establishment of protein localization	5	1	9.66598	0.115893	0.228425
GO:0050851	antigen receptor-mediated signaling pathway	5	1	9.66598	0.115893	0.228425
GO:0031915	positive regulation of synaptic plasticity	5	1	9.66598	0.115893	0.228425
GO:0016202	regulation of striated muscle tissue development	5	1	9.66598	0.115893	0.228425
GO:0035634	response to stilbenoid	5	1	9.66598	0.115893	0.228425
GO:0060355	positive regulation of cell adhesion molecule production	5	1	9.66598	0.115893	0.228425
GO:0046599	regulation of centriole replication	5	1	9.66598	0.115893	0.228425
GO:0007598	blood coagulation, extrinsic pathway	5	1	9.66598	0.115893	0.228425
GO:0030823	regulation of cGMP metabolic process	5	1	9.66598	0.115893	0.228425
GO:0033227	dsRNA transport	5	1	9.66598	0.115893	0.228425
GO:0003081	regulation of systemic arterial blood pressure by renin-angiotensin	5	1	9.66598	0.115893	0.228425
GO:0043367	CD4-positive, alpha-beta T cell differentiation	5	1	9.66598	0.115893	0.228425
GO:0060628	regulation of ER to Golgi vesicle-mediated transport	5	1	9.66598	0.115893	0.228425
GO:0048752	semicircular canal morphogenesis	5	1	9.66598	0.115893	0.228425
GO:0030497	fatty acid elongation	5	1	9.66598	0.115893	0.228425
GO:0070934	CRD-mediated mRNA stabilization	5	1	9.66598	0.115893	0.228425
GO:0000186	activation of MAPKK activity	230	8	1.68104	0.116031	0.228425
GO:0043388	positive regulation of DNA binding	27	2	3.57999	0.117113	0.22952
GO:0045595	regulation of cell differentiation	27	2	3.57999	0.117113	0.22952
GO:0060135	maternal process involved in female pregnancy	27	2	3.57999	0.117113	0.22952
GO:0060612	adipose tissue development	27	2	3.57999	0.117113	0.22952
GO:0016050	vesicle organization	27	2	3.57999	0.117113	0.22952
GO:0032007	negative regulation of TOR signaling	27	2	3.57999	0.117113	0.22952
GO:0007399	nervous system development	269	9	1.61699	0.11813	0.230928
GO:0048015	phosphatidylinositol-mediated signaling	122	5	1.98073	0.118516	0.230966
GO:0032092	positive regulation of protein binding	56	3	2.5891	0.118779	0.230966
GO:0016049	cell growth	56	3	2.5891	0.118779	0.230966
GO:0007093	mitotic cell cycle checkpoint	28	2	3.45214	0.123854	0.238107
GO:0001569	patterning of blood vessels	28	2	3.45214	0.123854	0.238107
GO:0010107	potassium ion import	28	2	3.45214	0.123854	0.238107
GO:0007616	long-term memory	28	2	3.45214	0.123854	0.238107
GO:0043392	negative regulation of DNA binding	28	2	3.45214	0.123854	0.238107
GO:0072332	intrinsic apoptotic signaling pathway by p53 class mediator	28	2	3.45214	0.123854	0.238107
GO:0016573	histone acetylation	28	2	3.45214	0.123854	0.238107
GO:0048008	platelet-derived growth factor receptor signaling pathway	28	2	3.45214	0.123854	0.238107
GO:0007052	mitotic spindle organization	28	2	3.45214	0.123854	0.238107
GO:0051592	response to calcium ion	58	3	2.49982	0.127753	0.244128
GO:0007160	cell-matrix adhesion	91	4	2.12439	0.129131	0.24649
GO:0006641	triglyceride metabolic process	29	2	3.3331	0.130685	0.247054
GO:0046627	negative regulation of insulin receptor signaling pathway	29	2	3.3331	0.130685	0.247054
GO:0045765	regulation of angiogenesis	29	2	3.3331	0.130685	0.247054
GO:0034612	response to tumor necrosis factor	29	2	3.3331	0.130685	0.247054
GO:0071479	cellular response to ionizing radiation	29	2	3.3331	0.130685	0.247054
GO:0007249	I-kappaB kinase/NF-kappaB signaling	59	3	2.45745	0.132328	0.247054
GO:0034599	cellular response to oxidative stress	59	3	2.45745	0.132328	0.247054
GO:0070301	cellular response to hydrogen peroxide	59	3	2.45745	0.132328	0.247054
GO:0006915	apoptotic process	599	17	1.37163	0.133121	0.247054
GO:0070585	protein localization to mitochondrion	6	1	8.05498	0.133855	0.247054
GO:1901385	regulation of voltage-gated calcium channel activity	6	1	8.05498	0.133855	0.247054
GO:1903265	positive regulation of tumor necrosis factor-mediated signaling pathway	6	1	8.05498	0.133855	0.247054
GO:0001661	conditioned taste aversion	6	1	8.05498	0.133855	0.247054
GO:0021879	forebrain neuron differentiation	6	1	8.05498	0.133855	0.247054
GO:0032914	positive regulation of transforming growth factor beta1 production	6	1	8.05498	0.133855	0.247054
GO:2000347	positive regulation of hepatocyte proliferation	6	1	8.05498	0.133855	0.247054
GO:0002043	blood vessel endothelial cell proliferation involved in sprouting angiogenesis	6	1	8.05498	0.133855	0.247054
GO:0090336	positive regulation of brown fat cell differentiation	6	1	8.05498	0.133855	0.247054
GO:0018344	protein geranylgeranylation	6	1	8.05498	0.133855	0.247054
GO:0000018	regulation of DNA recombination	6	1	8.05498	0.133855	0.247054
GO:0033591	response to L-ascorbic acid	6	1	8.05498	0.133855	0.247054
GO:0061000	negative regulation of dendritic spine development	6	1	8.05498	0.133855	0.247054
GO:0010564	regulation of cell cycle process	6	1	8.05498	0.133855	0.247054
GO:0060740	prostate gland epithelium morphogenesis	6	1	8.05498	0.133855	0.247054
GO:1902533	positive regulation of intracellular signal transduction	6	1	8.05498	0.133855	0.247054
GO:0060253	negative regulation of glial cell proliferation	6	1	8.05498	0.133855	0.247054
GO:0006924	activation-induced cell death of T cells	6	1	8.05498	0.133855	0.247054
GO:0001936	regulation of endothelial cell proliferation	6	1	8.05498	0.133855	0.247054
GO:0006048	UDP-N-acetylglucosamine biosynthetic process	6	1	8.05498	0.133855	0.247054
GO:0015824	proline transport	6	1	8.05498	0.133855	0.247054
GO:0048667	cell morphogenesis involved in neuron differentiation	6	1	8.05498	0.133855	0.247054
GO:0009052	pentose-phosphate shunt, non-oxidative branch	6	1	8.05498	0.133855	0.247054
GO:0021532	neural tube patterning	6	1	8.05498	0.133855	0.247054
GO:2000288	positive regulation of myoblast proliferation	6	1	8.05498	0.133855	0.247054
GO:0031394	positive regulation of prostaglandin biosynthetic process	6	1	8.05498	0.133855	0.247054
GO:0002740	negative regulation of cytokine secretion involved in immune response	6	1	8.05498	0.133855	0.247054
GO:0007270	neuron-neuron synaptic transmission	6	1	8.05498	0.133855	0.247054
GO:0032933	SREBP signaling pathway	6	1	8.05498	0.133855	0.247054
GO:0071321	cellular response to cGMP	6	1	8.05498	0.133855	0.247054
GO:0001775	cell activation	6	1	8.05498	0.133855	0.247054
GO:0014050	negative regulation of glutamate secretion	6	1	8.05498	0.133855	0.247054
GO:2000323	negative regulation of glucocorticoid receptor signaling pathway	6	1	8.05498	0.133855	0.247054
GO:1902065	response to L-glutamate	6	1	8.05498	0.133855	0.247054
GO:0043620	regulation of DNA-templated transcription in response to stress	6	1	8.05498	0.133855	0.247054
GO:0046321	positive regulation of fatty acid oxidation	6	1	8.05498	0.133855	0.247054
GO:0051271	negative regulation of cellular component movement	6	1	8.05498	0.133855	0.247054
GO:0035493	SNARE complex assembly	6	1	8.05498	0.133855	0.247054
GO:0045591	positive regulation of regulatory T cell differentiation	6	1	8.05498	0.133855	0.247054
GO:0009108	coenzyme biosynthetic process	6	1	8.05498	0.133855	0.247054
GO:0032792	negative regulation of CREB transcription factor activity	6	1	8.05498	0.133855	0.247054
GO:1902231	positive regulation of intrinsic apoptotic signaling pathway in response to DNA damage	6	1	8.05498	0.133855	0.247054
GO:0097119	postsynaptic density protein 95 clustering	6	1	8.05498	0.133855	0.247054
GO:0006596	polyamine biosynthetic process	6	1	8.05498	0.133855	0.247054
GO:0060136	embryonic process involved in female pregnancy	6	1	8.05498	0.133855	0.247054
GO:0060664	epithelial cell proliferation involved in salivary gland morphogenesis	6	1	8.05498	0.133855	0.247054
GO:0071548	response to dexamethasone	6	1	8.05498	0.133855	0.247054
GO:0002381	immunoglobulin production involved in immunoglobulin mediated immune response	6	1	8.05498	0.133855	0.247054
GO:0060501	positive regulation of epithelial cell proliferation involved in lung morphogenesis	6	1	8.05498	0.133855	0.247054
GO:0048312	intracellular distribution of mitochondria	6	1	8.05498	0.133855	0.247054
GO:0021984	adenohypophysis development	6	1	8.05498	0.133855	0.247054
GO:0060363	cranial suture morphogenesis	6	1	8.05498	0.133855	0.247054
GO:0000395	mRNA 5'-splice site recognition	6	1	8.05498	0.133855	0.247054
GO:0007098	centrosome cycle	6	1	8.05498	0.133855	0.247054
GO:0023041	neuronal signal transduction	6	1	8.05498	0.133855	0.247054
GO:0048541	Peyer's patch development	6	1	8.05498	0.133855	0.247054
GO:0042297	vocal learning	6	1	8.05498	0.133855	0.247054
GO:0060087	relaxation of vascular smooth muscle	6	1	8.05498	0.133855	0.247054
GO:0046069	cGMP catabolic process	6	1	8.05498	0.133855	0.247054
GO:0007202	activation of phospholipase C activity	60	3	2.41649	0.136959	0.252182
GO:0050873	brown fat cell differentiation	30	2	3.22199	0.137599	0.252694
GO:0010803	regulation of tumor necrosis factor-mediated signaling pathway	30	2	3.22199	0.137599	0.252694
GO:0001975	response to amphetamine	30	2	3.22199	0.137599	0.252694
GO:0046777	protein autophosphorylation	167	6	1.7364	0.143348	0.262835
GO:0071356	cellular response to tumor necrosis factor	95	4	2.03494	0.143656	0.263124
GO:0009953	dorsal/ventral pattern formation	31	2	3.11806	0.144591	0.263866
GO:0048701	embryonic cranial skeleton morphogenesis	31	2	3.11806	0.144591	0.263866
GO:0042149	cellular response to glucose starvation	31	2	3.11806	0.144591	0.263866
GO:0000387	spliceosomal snRNP assembly	31	2	3.11806	0.144591	0.263866
GO:0046677	response to antibiotic	31	2	3.11806	0.144591	0.263866
GO:0000722	telomere maintenance via recombination	31	2	3.11806	0.144591	0.263866
GO:0010332	response to gamma radiation	31	2	3.11806	0.144591	0.263866
GO:0032436	positive regulation of proteasomal ubiquitin-dependent protein catabolic process	62	3	2.33854	0.146381	0.266168
GO:0000165	MAPK cascade	245	8	1.57812	0.147825	0.266168
GO:0001934	positive regulation of protein phosphorylation	132	5	1.83068	0.148613	0.266168
GO:0007613	memory	63	3	2.30142	0.151169	0.266168
GO:0031398	positive regulation of protein ubiquitination	63	3	2.30142	0.151169	0.266168
GO:0051291	protein heterooligomerization	63	3	2.30142	0.151169	0.266168
GO:0030916	otic vesicle formation	7	1	6.90427	0.151451	0.266168
GO:0010458	exit from mitosis	7	1	6.90427	0.151451	0.266168
GO:0046010	positive regulation of circadian sleep/wake cycle, non-REM sleep	7	1	6.90427	0.151451	0.266168
GO:0010193	response to ozone	7	1	6.90427	0.151451	0.266168
GO:0000460	maturation of 5.8S rRNA	7	1	6.90427	0.151451	0.266168
GO:2000300	regulation of synaptic vesicle exocytosis	7	1	6.90427	0.151451	0.266168
GO:0045955	negative regulation of calcium ion-dependent exocytosis	7	1	6.90427	0.151451	0.266168
GO:0015808	L-alanine transport	7	1	6.90427	0.151451	0.266168
GO:0031062	positive regulation of histone methylation	7	1	6.90427	0.151451	0.266168
GO:0034141	positive regulation of toll-like receptor 3 signaling pathway	7	1	6.90427	0.151451	0.266168
GO:0045630	positive regulation of T-helper 2 cell differentiation	7	1	6.90427	0.151451	0.266168
GO:0032411	positive regulation of transporter activity	7	1	6.90427	0.151451	0.266168
GO:0043951	negative regulation of cAMP-mediated signaling	7	1	6.90427	0.151451	0.266168
GO:0042304	regulation of fatty acid biosynthetic process	7	1	6.90427	0.151451	0.266168
GO:0051782	negative regulation of cell division	7	1	6.90427	0.151451	0.266168
GO:0051646	mitochondrion localization	7	1	6.90427	0.151451	0.266168
GO:0071312	cellular response to alkaloid	7	1	6.90427	0.151451	0.266168
GO:0019388	galactose catabolic process	7	1	6.90427	0.151451	0.266168
GO:0034340	response to type I interferon	7	1	6.90427	0.151451	0.266168
GO:0030213	hyaluronan biosynthetic process	7	1	6.90427	0.151451	0.266168
GO:0034698	response to gonadotropin	7	1	6.90427	0.151451	0.266168
GO:0048739	cardiac muscle fiber development	7	1	6.90427	0.151451	0.266168
GO:0046826	negative regulation of protein export from nucleus	7	1	6.90427	0.151451	0.266168
GO:0048793	pronephros development	7	1	6.90427	0.151451	0.266168
GO:0031848	protection from non-homologous end joining at telomere	7	1	6.90427	0.151451	0.266168
GO:0061298	retina vasculature development in camera-type eye	7	1	6.90427	0.151451	0.266168
GO:2000144	positive regulation of DNA-templated transcription, initiation	7	1	6.90427	0.151451	0.266168
GO:0009750	response to fructose	7	1	6.90427	0.151451	0.266168
GO:2001022	positive regulation of response to DNA damage stimulus	7	1	6.90427	0.151451	0.266168
GO:0001553	luteinization	7	1	6.90427	0.151451	0.266168
GO:0021798	forebrain dorsal/ventral pattern formation	7	1	6.90427	0.151451	0.266168
GO:0043312	neutrophil degranulation	7	1	6.90427	0.151451	0.266168
GO:2000210	positive regulation of anoikis	7	1	6.90427	0.151451	0.266168
GO:0051549	positive regulation of keratinocyte migration	7	1	6.90427	0.151451	0.266168
GO:0030278	regulation of ossification	7	1	6.90427	0.151451	0.266168
GO:0002377	immunoglobulin production	7	1	6.90427	0.151451	0.266168
GO:0051247	positive regulation of protein metabolic process	7	1	6.90427	0.151451	0.266168
GO:0045359	positive regulation of interferon-beta biosynthetic process	7	1	6.90427	0.151451	0.266168
GO:1901018	positive regulation of potassium ion transmembrane transporter activity	7	1	6.90427	0.151451	0.266168
GO:0051971	positive regulation of transmission of nerve impulse	7	1	6.90427	0.151451	0.266168
GO:0071870	cellular response to catecholamine stimulus	7	1	6.90427	0.151451	0.266168
GO:0043382	positive regulation of memory T cell differentiation	7	1	6.90427	0.151451	0.266168
GO:0070257	positive regulation of mucus secretion	7	1	6.90427	0.151451	0.266168
GO:0046039	GTP metabolic process	7	1	6.90427	0.151451	0.266168
GO:0031584	activation of phospholipase D activity	7	1	6.90427	0.151451	0.266168
GO:0050691	regulation of defense response to virus by host	7	1	6.90427	0.151451	0.266168
GO:0042308	negative regulation of protein import into nucleus	7	1	6.90427	0.151451	0.266168
GO:0071455	cellular response to hyperoxia	7	1	6.90427	0.151451	0.266168
GO:0045842	positive regulation of mitotic metaphase/anaphase transition	7	1	6.90427	0.151451	0.266168
GO:2000270	negative regulation of fibroblast apoptotic process	7	1	6.90427	0.151451	0.266168
GO:1903608	protein localization to cytoplasmic stress granule	7	1	6.90427	0.151451	0.266168
GO:0035524	proline transmembrane transport	7	1	6.90427	0.151451	0.266168
GO:1903140	regulation of establishment of endothelial barrier	7	1	6.90427	0.151451	0.266168
GO:0006584	catecholamine metabolic process	7	1	6.90427	0.151451	0.266168
GO:0010737	protein kinase A signaling	7	1	6.90427	0.151451	0.266168
GO:0045581	negative regulation of T cell differentiation	7	1	6.90427	0.151451	0.266168
GO:0006927	transformed cell apoptotic process	7	1	6.90427	0.151451	0.266168
GO:0002438	acute inflammatory response to antigenic stimulus	7	1	6.90427	0.151451	0.266168
GO:0022010	central nervous system myelination	7	1	6.90427	0.151451	0.266168
GO:0097264	self proteolysis	7	1	6.90427	0.151451	0.266168
GO:0071287	cellular response to manganese ion	7	1	6.90427	0.151451	0.266168
GO:0045606	positive regulation of epidermal cell differentiation	7	1	6.90427	0.151451	0.266168
GO:0072593	reactive oxygen species metabolic process	32	2	3.02062	0.151654	0.266168
GO:2001240	negative regulation of extrinsic apoptotic signaling pathway in absence of ligand	32	2	3.02062	0.151654	0.266168
GO:0018279	protein N-linked glycosylation via asparagine	247	8	1.56534	0.152355	0.26686
GO:0008284	positive regulation of cell proliferation	448	13	1.40243	0.15304	0.267188
GO:0042517	positive regulation of tyrosine phosphorylation of Stat3 protein	33	2	2.92908	0.158783	0.27604
GO:0090307	mitotic spindle assembly	33	2	2.92908	0.158783	0.27604
GO:0016485	protein processing	65	3	2.23061	0.16089	0.278868
GO:0030593	neutrophil chemotaxis	65	3	2.23061	0.16089	0.278868
GO:0006367	transcription initiation from RNA polymerase II promoter	251	8	1.5404	0.161609	0.279559
GO:0000187	activation of MAPK activity	100	4	1.9332	0.162652	0.279836
GO:0046474	glycerophospholipid biosynthetic process	100	4	1.9332	0.162652	0.279836
GO:0008217	regulation of blood pressure	66	3	2.19681	0.165819	0.282126
GO:0030282	bone mineralization	34	2	2.84294	0.165973	0.282126
GO:0042130	negative regulation of T cell proliferation	34	2	2.84294	0.165973	0.282126
GO:0043491	protein kinase B signaling	34	2	2.84294	0.165973	0.282126
GO:0042593	glucose homeostasis	101	4	1.91406	0.166555	0.282126
GO:2000643	positive regulation of early endosome to late endosome transport	8	1	6.04124	0.168689	0.282126
GO:0050877	neurological system process	8	1	6.04124	0.168689	0.282126
GO:0060013	righting reflex	8	1	6.04124	0.168689	0.282126
GO:1900246	positive regulation of RIG-I signaling pathway	8	1	6.04124	0.168689	0.282126
GO:0002456	T cell mediated immunity	8	1	6.04124	0.168689	0.282126
GO:0090050	positive regulation of cell migration involved in sprouting angiogenesis	8	1	6.04124	0.168689	0.282126
GO:0070102	interleukin-6-mediated signaling pathway	8	1	6.04124	0.168689	0.282126
GO:0032691	negative regulation of interleukin-1 beta production	8	1	6.04124	0.168689	0.282126
GO:0002446	neutrophil mediated immunity	8	1	6.04124	0.168689	0.282126
GO:0006972	hyperosmotic response	8	1	6.04124	0.168689	0.282126
GO:0014894	response to denervation involved in regulation of muscle adaptation	8	1	6.04124	0.168689	0.282126
GO:0060452	positive regulation of cardiac muscle contraction	8	1	6.04124	0.168689	0.282126
GO:0033129	positive regulation of histone phosphorylation	8	1	6.04124	0.168689	0.282126
GO:0035970	peptidyl-threonine dephosphorylation	8	1	6.04124	0.168689	0.282126
GO:0002523	leukocyte migration involved in inflammatory response	8	1	6.04124	0.168689	0.282126
GO:0030903	notochord development	8	1	6.04124	0.168689	0.282126
GO:0043068	positive regulation of programmed cell death	8	1	6.04124	0.168689	0.282126
GO:0010888	negative regulation of lipid storage	8	1	6.04124	0.168689	0.282126
GO:0000098	sulfur amino acid catabolic process	8	1	6.04124	0.168689	0.282126
GO:0061158	3'-UTR-mediated mRNA destabilization	8	1	6.04124	0.168689	0.282126
GO:0046784	viral mRNA export from host cell nucleus	8	1	6.04124	0.168689	0.282126
GO:0035234	ectopic germ cell programmed cell death	8	1	6.04124	0.168689	0.282126
GO:2001020	regulation of response to DNA damage stimulus	8	1	6.04124	0.168689	0.282126
GO:0060012	synaptic transmission, glycinergic	8	1	6.04124	0.168689	0.282126
GO:0051168	nuclear export	8	1	6.04124	0.168689	0.282126
GO:0051764	actin crosslink formation	8	1	6.04124	0.168689	0.282126
GO:0043304	regulation of mast cell degranulation	8	1	6.04124	0.168689	0.282126
GO:0002221	pattern recognition receptor signaling pathway	8	1	6.04124	0.168689	0.282126
GO:0030643	cellular phosphate ion homeostasis	8	1	6.04124	0.168689	0.282126
GO:0007289	spermatid nucleus differentiation	8	1	6.04124	0.168689	0.282126
GO:0006515	misfolded or incompletely synthesized protein catabolic process	8	1	6.04124	0.168689	0.282126
GO:0021952	central nervous system projection neuron axonogenesis	8	1	6.04124	0.168689	0.282126
GO:0032688	negative regulation of interferon-beta production	8	1	6.04124	0.168689	0.282126
GO:0045410	positive regulation of interleukin-6 biosynthetic process	8	1	6.04124	0.168689	0.282126
GO:0035456	response to interferon-beta	8	1	6.04124	0.168689	0.282126
GO:0031023	microtubule organizing center organization	8	1	6.04124	0.168689	0.282126
GO:0030210	heparin biosynthetic process	8	1	6.04124	0.168689	0.282126
GO:1902074	response to salt	8	1	6.04124	0.168689	0.282126
GO:0042119	neutrophil activation	8	1	6.04124	0.168689	0.282126
GO:0003300	cardiac muscle hypertrophy	8	1	6.04124	0.168689	0.282126
GO:0019227	neuronal action potential propagation	8	1	6.04124	0.168689	0.282126
GO:0048660	regulation of smooth muscle cell proliferation	8	1	6.04124	0.168689	0.282126
GO:0002455	humoral immune response mediated by circulating immunoglobulin	8	1	6.04124	0.168689	0.282126
GO:0032731	positive regulation of interleukin-1 beta production	8	1	6.04124	0.168689	0.282126
GO:0033146	regulation of intracellular estrogen receptor signaling pathway	8	1	6.04124	0.168689	0.282126
GO:0021612	facial nerve structural organization	8	1	6.04124	0.168689	0.282126
GO:0014824	artery smooth muscle contraction	8	1	6.04124	0.168689	0.282126
GO:0010544	negative regulation of platelet activation	8	1	6.04124	0.168689	0.282126
GO:0019934	cGMP-mediated signaling	8	1	6.04124	0.168689	0.282126
GO:0017121	phospholipid scrambling	8	1	6.04124	0.168689	0.282126
GO:0010614	negative regulation of cardiac muscle hypertrophy	8	1	6.04124	0.168689	0.282126
GO:0003143	embryonic heart tube morphogenesis	8	1	6.04124	0.168689	0.282126
GO:0043457	regulation of cellular respiration	8	1	6.04124	0.168689	0.282126
GO:1904322	cellular response to forskolin	8	1	6.04124	0.168689	0.282126
GO:0034144	negative regulation of toll-like receptor 4 signaling pathway	8	1	6.04124	0.168689	0.282126
GO:2000737	negative regulation of stem cell differentiation	8	1	6.04124	0.168689	0.282126
GO:0035137	hindlimb morphogenesis	8	1	6.04124	0.168689	0.282126
GO:0006996	organelle organization	294	9	1.47949	0.169001	0.282126
GO:0051091	positive regulation of sequence-specific DNA binding transcription factor activity	102	4	1.89529	0.170491	0.284341
GO:0044267	cellular protein metabolic process	883	23	1.25888	0.171848	0.284834
GO:0033572	transferrin transport	35	2	2.76171	0.173216	0.286829
GO:0045597	positive regulation of cell differentiation	35	2	2.76171	0.173216	0.286829
GO:0030968	endoplasmic reticulum unfolded protein response	103	4	1.87689	0.174458	0.288612
GO:0032088	negative regulation of NF-kappaB transcription factor activity	68	3	2.1322	0.175806	0.290428
GO:0007030	Golgi organization	68	3	2.1322	0.175806	0.290428
GO:0002250	adaptive immune response	141	5	1.71383	0.178134	0.293902
GO:0034142	toll-like receptor 4 signaling pathway	104	4	1.85884	0.178457	0.293902
GO:0007080	mitotic metaphase plate congression	36	2	2.68499	0.180509	0.296233
GO:0009749	response to glucose	69	3	2.1013	0.180861	0.296391
GO:0050729	positive regulation of inflammatory response	69	3	2.1013	0.180861	0.296391
GO:0034605	cellular response to heat	105	4	1.84114	0.182486	0.298493
GO:1903206	negative regulation of hydrogen peroxide-induced cell death	9	1	5.36999	0.185575	0.298987
GO:0001825	blastocyst formation	9	1	5.36999	0.185575	0.298987
GO:0045198	establishment of epithelial cell apical/basal polarity	9	1	5.36999	0.185575	0.298987
GO:0032464	positive regulation of protein homooligomerization	9	1	5.36999	0.185575	0.298987
GO:1900119	positive regulation of execution phase of apoptosis	9	1	5.36999	0.185575	0.298987
GO:1902895	positive regulation of pri-miRNA transcription from RNA polymerase II promoter	9	1	5.36999	0.185575	0.298987
GO:1903351	cellular response to dopamine	9	1	5.36999	0.185575	0.298987
GO:0006853	carnitine shuttle	9	1	5.36999	0.185575	0.298987
GO:0016126	sterol biosynthetic process	9	1	5.36999	0.185575	0.298987
GO:1990001	inhibition of cysteine-type endopeptidase activity involved in apoptotic process	9	1	5.36999	0.185575	0.298987
GO:0090084	negative regulation of inclusion body assembly	9	1	5.36999	0.185575	0.298987
GO:0090394	negative regulation of excitatory postsynaptic potential	9	1	5.36999	0.185575	0.298987
GO:0051146	striated muscle cell differentiation	9	1	5.36999	0.185575	0.298987
GO:0032703	negative regulation of interleukin-2 production	9	1	5.36999	0.185575	0.298987
GO:0048149	behavioral response to ethanol	9	1	5.36999	0.185575	0.298987
GO:0015937	coenzyme A biosynthetic process	9	1	5.36999	0.185575	0.298987
GO:0044320	cellular response to leptin stimulus	9	1	5.36999	0.185575	0.298987
GO:0010838	positive regulation of keratinocyte proliferation	9	1	5.36999	0.185575	0.298987
GO:0003014	renal system process	9	1	5.36999	0.185575	0.298987
GO:0097104	postsynaptic membrane assembly	9	1	5.36999	0.185575	0.298987
GO:0040037	negative regulation of fibroblast growth factor receptor signaling pathway	9	1	5.36999	0.185575	0.298987
GO:0006307	DNA dealkylation involved in DNA repair	9	1	5.36999	0.185575	0.298987
GO:0060322	head development	9	1	5.36999	0.185575	0.298987
GO:0060670	branching involved in labyrinthine layer morphogenesis	9	1	5.36999	0.185575	0.298987
GO:0019852	L-ascorbic acid metabolic process	9	1	5.36999	0.185575	0.298987
GO:0003334	keratinocyte development	9	1	5.36999	0.185575	0.298987
GO:0002480	antigen processing and presentation of exogenous peptide antigen via MHC class I, TAP-independent	9	1	5.36999	0.185575	0.298987
GO:0046007	negative regulation of activated T cell proliferation	9	1	5.36999	0.185575	0.298987
GO:0009649	entrainment of circadian clock	9	1	5.36999	0.185575	0.298987
GO:0021895	cerebral cortex neuron differentiation	9	1	5.36999	0.185575	0.298987
GO:0033689	negative regulation of osteoblast proliferation	9	1	5.36999	0.185575	0.298987
GO:0033627	cell adhesion mediated by integrin	9	1	5.36999	0.185575	0.298987
GO:0010863	positive regulation of phospholipase C activity	9	1	5.36999	0.185575	0.298987
GO:0006983	ER overload response	9	1	5.36999	0.185575	0.298987
GO:0045792	negative regulation of cell size	9	1	5.36999	0.185575	0.298987
GO:0036500	ATF6-mediated unfolded protein response	9	1	5.36999	0.185575	0.298987
GO:0016242	negative regulation of macroautophagy	9	1	5.36999	0.185575	0.298987
GO:0097120	receptor localization to synapse	9	1	5.36999	0.185575	0.298987
GO:0035418	protein localization to synapse	9	1	5.36999	0.185575	0.298987
GO:0060252	positive regulation of glial cell proliferation	9	1	5.36999	0.185575	0.298987
GO:0032835	glomerulus development	9	1	5.36999	0.185575	0.298987
GO:0009629	response to gravity	9	1	5.36999	0.185575	0.298987
GO:1901380	negative regulation of potassium ion transmembrane transport	9	1	5.36999	0.185575	0.298987
GO:0050848	regulation of calcium-mediated signaling	9	1	5.36999	0.185575	0.298987
GO:0010388	cullin deneddylation	9	1	5.36999	0.185575	0.298987
GO:0007184	SMAD protein import into nucleus	9	1	5.36999	0.185575	0.298987
GO:0032308	positive regulation of prostaglandin secretion	9	1	5.36999	0.185575	0.298987
GO:0048245	eosinophil chemotaxis	9	1	5.36999	0.185575	0.298987
GO:0086009	membrane repolarization	9	1	5.36999	0.185575	0.298987
GO:0002675	positive regulation of acute inflammatory response	9	1	5.36999	0.185575	0.298987
GO:0042698	ovulation cycle	9	1	5.36999	0.185575	0.298987
GO:0006289	nucleotide-excision repair	106	4	1.82377	0.186545	0.300272
GO:0043124	negative regulation of I-kappaB kinase/NF-kappaB signaling	37	2	2.61243	0.187847	0.302089
GO:0043407	negative regulation of MAP kinase activity	37	2	2.61243	0.187847	0.302089
GO:0001649	osteoblast differentiation	107	4	1.80673	0.190632	0.306285
GO:0042060	wound healing	71	3	2.04211	0.191084	0.306799
GO:0008285	negative regulation of cell proliferation	388	11	1.37018	0.195077	0.311938
GO:0051781	positive regulation of cell division	38	2	2.54368	0.195224	0.311938
GO:0050890	cognition	38	2	2.54368	0.195224	0.311938
GO:0045740	positive regulation of DNA replication	38	2	2.54368	0.195224	0.311938
GO:0033683	nucleotide-excision repair, DNA incision	38	2	2.54368	0.195224	0.311938
GO:0007611	learning or memory	38	2	2.54368	0.195224	0.311938
GO:0030512	negative regulation of transforming growth factor beta receptor signaling pathway	72	3	2.01375	0.196248	0.313144
GO:0043161	proteasome-mediated ubiquitin-dependent protein catabolic process	109	4	1.77357	0.198889	0.317025
GO:0007049	cell cycle	187	6	1.55069	0.201984	0.317025
GO:0032525	somite rostral/caudal axis specification	10	1	4.83299	0.202118	0.317025
GO:0034145	positive regulation of toll-like receptor 4 signaling pathway	10	1	4.83299	0.202118	0.317025
GO:0035455	response to interferon-alpha	10	1	4.83299	0.202118	0.317025
GO:0042535	positive regulation of tumor necrosis factor biosynthetic process	10	1	4.83299	0.202118	0.317025
GO:0032940	secretion by cell	10	1	4.83299	0.202118	0.317025
GO:0045598	regulation of fat cell differentiation	10	1	4.83299	0.202118	0.317025
GO:0033151	V(D)J recombination	10	1	4.83299	0.202118	0.317025
GO:0008593	regulation of Notch signaling pathway	10	1	4.83299	0.202118	0.317025
GO:0034116	positive regulation of heterotypic cell-cell adhesion	10	1	4.83299	0.202118	0.317025
GO:0031115	negative regulation of microtubule polymerization	10	1	4.83299	0.202118	0.317025
GO:1904903	ESCRT III complex disassembly	10	1	4.83299	0.202118	0.317025
GO:0035278	miRNA mediated inhibition of translation	10	1	4.83299	0.202118	0.317025
GO:0033089	positive regulation of T cell differentiation in thymus	10	1	4.83299	0.202118	0.317025
GO:0014067	negative regulation of phosphatidylinositol 3-kinase signaling	10	1	4.83299	0.202118	0.317025
GO:0036376	sodium ion export from cell	10	1	4.83299	0.202118	0.317025
GO:0051382	kinetochore assembly	10	1	4.83299	0.202118	0.317025
GO:0051775	response to redox state	10	1	4.83299	0.202118	0.317025
GO:0051918	negative regulation of fibrinolysis	10	1	4.83299	0.202118	0.317025
GO:0010700	negative regulation of norepinephrine secretion	10	1	4.83299	0.202118	0.317025
GO:0010761	fibroblast migration	10	1	4.83299	0.202118	0.317025
GO:0042416	dopamine biosynthetic process	10	1	4.83299	0.202118	0.317025
GO:0042551	neuron maturation	10	1	4.83299	0.202118	0.317025
GO:0001759	organ induction	10	1	4.83299	0.202118	0.317025
GO:0032966	negative regulation of collagen biosynthetic process	10	1	4.83299	0.202118	0.317025
GO:0042053	regulation of dopamine metabolic process	10	1	4.83299	0.202118	0.317025
GO:0061001	regulation of dendritic spine morphogenesis	10	1	4.83299	0.202118	0.317025
GO:0043129	surfactant homeostasis	10	1	4.83299	0.202118	0.317025
GO:0048745	smooth muscle tissue development	10	1	4.83299	0.202118	0.317025
GO:0010226	response to lithium ion	10	1	4.83299	0.202118	0.317025
GO:1901653	cellular response to peptide	10	1	4.83299	0.202118	0.317025
GO:0035871	protein K11-linked deubiquitination	10	1	4.83299	0.202118	0.317025
GO:0032502	developmental process	10	1	4.83299	0.202118	0.317025
GO:0006071	glycerol metabolic process	10	1	4.83299	0.202118	0.317025
GO:0002544	chronic inflammatory response	10	1	4.83299	0.202118	0.317025
GO:0001893	maternal placenta development	10	1	4.83299	0.202118	0.317025
GO:0061014	positive regulation of mRNA catabolic process	10	1	4.83299	0.202118	0.317025
GO:0050852	T cell receptor signaling pathway	148	5	1.63277	0.202469	0.317025
GO:0006695	cholesterol biosynthetic process	39	2	2.47846	0.202636	0.317025
GO:0019054	modulation by virus of host process	39	2	2.47846	0.202636	0.317025
GO:0060291	long-term synaptic potentiation	39	2	2.47846	0.202636	0.317025
GO:0070527	platelet aggregation	39	2	2.47846	0.202636	0.317025
GO:0008277	regulation of G-protein coupled receptor protein signaling pathway	39	2	2.47846	0.202636	0.317025
GO:0001558	regulation of cell growth	74	3	1.95932	0.206676	0.32291
GO:0034976	response to endoplasmic reticulum stress	74	3	1.95932	0.206676	0.32291
GO:0031018	endocrine pancreas development	40	2	2.41649	0.210079	0.327494
GO:0045599	negative regulation of fat cell differentiation	40	2	2.41649	0.210079	0.327494
GO:0006633	fatty acid biosynthetic process	40	2	2.41649	0.210079	0.327494
GO:0030514	negative regulation of BMP signaling pathway	40	2	2.41649	0.210079	0.327494
GO:0031295	T cell costimulation	75	3	1.9332	0.211935	0.329945
GO:0050728	negative regulation of inflammatory response	75	3	1.9332	0.211935	0.329945
GO:0030155	regulation of cell adhesion	41	2	2.35756	0.217547	0.334956
GO:0010608	posttranscriptional regulation of gene expression	11	1	4.39363	0.218324	0.334956
GO:0032434	regulation of proteasomal ubiquitin-dependent protein catabolic process	11	1	4.39363	0.218324	0.334956
GO:0043117	positive regulation of vascular permeability	11	1	4.39363	0.218324	0.334956
GO:0033327	Leydig cell differentiation	11	1	4.39363	0.218324	0.334956
GO:0055078	sodium ion homeostasis	11	1	4.39363	0.218324	0.334956
GO:0046849	bone remodeling	11	1	4.39363	0.218324	0.334956
GO:0010759	positive regulation of macrophage chemotaxis	11	1	4.39363	0.218324	0.334956
GO:0097105	presynaptic membrane assembly	11	1	4.39363	0.218324	0.334956
GO:0010763	positive regulation of fibroblast migration	11	1	4.39363	0.218324	0.334956
GO:0016075	rRNA catabolic process	11	1	4.39363	0.218324	0.334956
GO:0032495	response to muramyl dipeptide	11	1	4.39363	0.218324	0.334956
GO:0045717	negative regulation of fatty acid biosynthetic process	11	1	4.39363	0.218324	0.334956
GO:0003094	glomerular filtration	11	1	4.39363	0.218324	0.334956
GO:0045779	negative regulation of bone resorption	11	1	4.39363	0.218324	0.334956
GO:0090129	positive regulation of synapse maturation	11	1	4.39363	0.218324	0.334956
GO:0046888	negative regulation of hormone secretion	11	1	4.39363	0.218324	0.334956
GO:0002218	activation of innate immune response	11	1	4.39363	0.218324	0.334956
GO:0048266	behavioral response to pain	11	1	4.39363	0.218324	0.334956
GO:0040015	negative regulation of multicellular organism growth	11	1	4.39363	0.218324	0.334956
GO:0050709	negative regulation of protein secretion	11	1	4.39363	0.218324	0.334956
GO:0000185	activation of MAPKKK activity	11	1	4.39363	0.218324	0.334956
GO:0008406	gonad development	11	1	4.39363	0.218324	0.334956
GO:0003016	respiratory system process	11	1	4.39363	0.218324	0.334956
GO:0035641	locomotory exploration behavior	11	1	4.39363	0.218324	0.334956
GO:0030431	sleep	11	1	4.39363	0.218324	0.334956
GO:0048484	enteric nervous system development	11	1	4.39363	0.218324	0.334956
GO:0050732	negative regulation of peptidyl-tyrosine phosphorylation	11	1	4.39363	0.218324	0.334956
GO:0051024	positive regulation of immunoglobulin secretion	11	1	4.39363	0.218324	0.334956
GO:0043032	positive regulation of macrophage activation	11	1	4.39363	0.218324	0.334956
GO:0060122	inner ear receptor stereocilium organization	11	1	4.39363	0.218324	0.334956
GO:0031076	embryonic camera-type eye development	11	1	4.39363	0.218324	0.334956
GO:0097202	activation of cysteine-type endopeptidase activity	11	1	4.39363	0.218324	0.334956
GO:0042347	negative regulation of NF-kappaB import into nucleus	11	1	4.39363	0.218324	0.334956
GO:0070997	neuron death	11	1	4.39363	0.218324	0.334956
GO:0034067	protein localization to Golgi apparatus	11	1	4.39363	0.218324	0.334956
GO:0032786	positive regulation of DNA-templated transcription, elongation	11	1	4.39363	0.218324	0.334956
GO:0006693	prostaglandin metabolic process	11	1	4.39363	0.218324	0.334956
GO:0042761	very long-chain fatty acid biosynthetic process	11	1	4.39363	0.218324	0.334956
GO:0002224	toll-like receptor signaling pathway	114	4	1.69579	0.219974	0.336894
GO:0045471	response to ethanol	114	4	1.69579	0.219974	0.336894
GO:0008283	cell proliferation	359	10	1.34624	0.223379	0.339204
GO:0006461	protein complex assembly	115	4	1.68104	0.22426	0.340245
GO:0034260	negative regulation of GTPase activity	42	2	2.30142	0.225038	0.340832
GO:0034080	CENP-A containing nucleosome assembly	42	2	2.30142	0.225038	0.340832
GO:0006974	cellular response to DNA damage stimulus	195	6	1.48707	0.227544	0.343731
GO:0045786	negative regulation of cell cycle	43	2	2.2479	0.232546	0.347611
GO:0031124	mRNA 3'-end processing	43	2	2.2479	0.232546	0.347611
GO:0000413	protein peptidyl-prolyl isomerization	43	2	2.2479	0.232546	0.347611
GO:0008210	estrogen metabolic process	12	1	4.02749	0.2342	0.347611
GO:0071318	cellular response to ATP	12	1	4.02749	0.2342	0.347611
GO:0055119	relaxation of cardiac muscle	12	1	4.02749	0.2342	0.347611
GO:0033197	response to vitamin E	12	1	4.02749	0.2342	0.347611
GO:0060134	prepulse inhibition	12	1	4.02749	0.2342	0.347611
GO:0014032	neural crest cell development	12	1	4.02749	0.2342	0.347611
GO:0015693	magnesium ion transport	12	1	4.02749	0.2342	0.347611
GO:0007252	I-kappaB phosphorylation	12	1	4.02749	0.2342	0.347611
GO:0021954	central nervous system neuron development	12	1	4.02749	0.2342	0.347611
GO:0007019	microtubule depolymerization	12	1	4.02749	0.2342	0.347611
GO:0046628	positive regulation of insulin receptor signaling pathway	12	1	4.02749	0.2342	0.347611
GO:0060644	mammary gland epithelial cell differentiation	12	1	4.02749	0.2342	0.347611
GO:0055089	fatty acid homeostasis	12	1	4.02749	0.2342	0.347611
GO:0032897	negative regulation of viral transcription	12	1	4.02749	0.2342	0.347611
GO:0072001	renal system development	12	1	4.02749	0.2342	0.347611
GO:0045078	positive regulation of interferon-gamma biosynthetic process	12	1	4.02749	0.2342	0.347611
GO:0032784	regulation of DNA-templated transcription, elongation	12	1	4.02749	0.2342	0.347611
GO:0030007	cellular potassium ion homeostasis	12	1	4.02749	0.2342	0.347611
GO:0030208	dermatan sulfate biosynthetic process	12	1	4.02749	0.2342	0.347611
GO:1990440	positive regulation of transcription from RNA polymerase II promoter in response to endoplasmic reticulum stress	12	1	4.02749	0.2342	0.347611
GO:0007171	activation of transmembrane receptor protein tyrosine kinase activity	12	1	4.02749	0.2342	0.347611
GO:0043616	keratinocyte proliferation	12	1	4.02749	0.2342	0.347611
GO:0006554	lysine catabolic process	12	1	4.02749	0.2342	0.347611
GO:0045060	negative thymic T cell selection	12	1	4.02749	0.2342	0.347611
GO:0006379	mRNA cleavage	12	1	4.02749	0.2342	0.347611
GO:0031000	response to caffeine	12	1	4.02749	0.2342	0.347611
GO:0045745	positive regulation of G-protein coupled receptor protein signaling pathway	12	1	4.02749	0.2342	0.347611
GO:0071397	cellular response to cholesterol	12	1	4.02749	0.2342	0.347611
GO:0043517	positive regulation of DNA damage response, signal transduction by p53 class mediator	12	1	4.02749	0.2342	0.347611
GO:0050710	negative regulation of cytokine secretion	12	1	4.02749	0.2342	0.347611
GO:0071391	cellular response to estrogen stimulus	12	1	4.02749	0.2342	0.347611
GO:0090399	replicative senescence	12	1	4.02749	0.2342	0.347611
GO:0036066	protein O-linked fucosylation	12	1	4.02749	0.2342	0.347611
GO:0006069	ethanol oxidation	12	1	4.02749	0.2342	0.347611
GO:0055008	cardiac muscle tissue morphogenesis	12	1	4.02749	0.2342	0.347611
GO:0048846	axon extension involved in axon guidance	12	1	4.02749	0.2342	0.347611
GO:0090162	establishment of epithelial cell polarity	12	1	4.02749	0.2342	0.347611
GO:0001829	trophectodermal cell differentiation	12	1	4.02749	0.2342	0.347611
GO:0045086	positive regulation of interleukin-2 biosynthetic process	12	1	4.02749	0.2342	0.347611
GO:0043923	positive regulation by host of viral transcription	12	1	4.02749	0.2342	0.347611
GO:0045176	apical protein localization	12	1	4.02749	0.2342	0.347611
GO:0070935	3'-UTR-mediated mRNA stabilization	12	1	4.02749	0.2342	0.347611
GO:0000956	nuclear-transcribed mRNA catabolic process	12	1	4.02749	0.2342	0.347611
GO:0030195	negative regulation of blood coagulation	12	1	4.02749	0.2342	0.347611
GO:0036499	PERK-mediated unfolded protein response	12	1	4.02749	0.2342	0.347611
GO:0002003	angiotensin maturation	12	1	4.02749	0.2342	0.347611
GO:0032211	negative regulation of telomere maintenance via telomerase	12	1	4.02749	0.2342	0.347611
GO:0007173	epidermal growth factor receptor signaling pathway	322	9	1.35084	0.235797	0.349312
GO:0030307	positive regulation of cell growth	80	3	1.81237	0.238625	0.353051
GO:0016241	regulation of macroautophagy	44	2	2.19681	0.240069	0.354049
GO:0050885	neuromuscular process controlling balance	44	2	2.19681	0.240069	0.354049
GO:0010595	positive regulation of endothelial cell migration	44	2	2.19681	0.240069	0.354049
GO:0008645	hexose transport	44	2	2.19681	0.240069	0.354049
GO:0007067	mitotic nuclear division	240	7	1.40962	0.240162	0.354049
GO:0018108	peptidyl-tyrosine phosphorylation	119	4	1.62453	0.241608	0.355879
GO:0051301	cell division	325	9	1.33837	0.243459	0.357926
GO:0035666	TRIF-dependent toll-like receptor signaling pathway	81	3	1.79	0.24403	0.358085
GO:0021762	substantia nigra development	45	2	2.148	0.247602	0.35942
GO:0001675	acrosome assembly	13	1	3.71768	0.249753	0.35942
GO:2000484	positive regulation of interleukin-8 secretion	13	1	3.71768	0.249753	0.35942
GO:0009100	glycoprotein metabolic process	13	1	3.71768	0.249753	0.35942
GO:0019372	lipoxygenase pathway	13	1	3.71768	0.249753	0.35942
GO:0001878	response to yeast	13	1	3.71768	0.249753	0.35942
GO:0097067	cellular response to thyroid hormone stimulus	13	1	3.71768	0.249753	0.35942
GO:0010996	response to auditory stimulus	13	1	3.71768	0.249753	0.35942
GO:1903830	magnesium ion transmembrane transport	13	1	3.71768	0.249753	0.35942
GO:0031116	positive regulation of microtubule polymerization	13	1	3.71768	0.249753	0.35942
GO:0008610	lipid biosynthetic process	13	1	3.71768	0.249753	0.35942
GO:0048712	negative regulation of astrocyte differentiation	13	1	3.71768	0.249753	0.35942
GO:0006941	striated muscle contraction	13	1	3.71768	0.249753	0.35942
GO:0045793	positive regulation of cell size	13	1	3.71768	0.249753	0.35942
GO:0033962	cytoplasmic mRNA processing body assembly	13	1	3.71768	0.249753	0.35942
GO:0050901	leukocyte tethering or rolling	13	1	3.71768	0.249753	0.35942
GO:0030194	positive regulation of blood coagulation	13	1	3.71768	0.249753	0.35942
GO:0070306	lens fiber cell differentiation	13	1	3.71768	0.249753	0.35942
GO:0042088	T-helper 1 type immune response	13	1	3.71768	0.249753	0.35942
GO:0071625	vocalization behavior	13	1	3.71768	0.249753	0.35942
GO:1901673	regulation of mitotic spindle assembly	13	1	3.71768	0.249753	0.35942
GO:0060389	pathway-restricted SMAD protein phosphorylation	13	1	3.71768	0.249753	0.35942
GO:0032516	positive regulation of phosphoprotein phosphatase activity	13	1	3.71768	0.249753	0.35942
GO:0043281	regulation of cysteine-type endopeptidase activity involved in apoptotic process	13	1	3.71768	0.249753	0.35942
GO:0035729	cellular response to hepatocyte growth factor stimulus	13	1	3.71768	0.249753	0.35942
GO:0010248	establishment or maintenance of transmembrane electrochemical gradient	13	1	3.71768	0.249753	0.35942
GO:0070498	interleukin-1-mediated signaling pathway	13	1	3.71768	0.249753	0.35942
GO:0033630	positive regulation of cell adhesion mediated by integrin	13	1	3.71768	0.249753	0.35942
GO:0045780	positive regulation of bone resorption	13	1	3.71768	0.249753	0.35942
GO:0071498	cellular response to fluid shear stress	13	1	3.71768	0.249753	0.35942
GO:0048747	muscle fiber development	13	1	3.71768	0.249753	0.35942
GO:0071850	mitotic cell cycle arrest	13	1	3.71768	0.249753	0.35942
GO:0001964	startle response	13	1	3.71768	0.249753	0.35942
GO:0097284	hepatocyte apoptotic process	13	1	3.71768	0.249753	0.35942
GO:0050921	positive regulation of chemotaxis	13	1	3.71768	0.249753	0.35942
GO:0033160	positive regulation of protein import into nucleus, translocation	13	1	3.71768	0.249753	0.35942
GO:0007034	vacuolar transport	13	1	3.71768	0.249753	0.35942
GO:0006355	regulation of transcription, DNA-templated	1300	31	1.15248	0.252028	0.360047
GO:0006493	protein O-linked glycosylation	83	3	1.74686	0.254896	0.362787
GO:0002756	MyD88-independent toll-like receptor signaling pathway	83	3	1.74686	0.254896	0.362787
GO:0015992	proton transport	46	2	2.1013	0.255143	0.362787
GO:0032880	regulation of protein localization	46	2	2.1013	0.255143	0.362787
GO:0048538	thymus development	46	2	2.1013	0.255143	0.362787
GO:0006397	mRNA processing	163	5	1.48251	0.257829	0.365564
GO:0007204	positive regulation of cytosolic calcium ion concentration	123	4	1.5717	0.259241	0.367267
GO:0032508	DNA duplex unwinding	47	2	2.05659	0.262686	0.371167
GO:0009267	cellular response to starvation	47	2	2.05659	0.262686	0.371167
GO:0006369	termination of RNA polymerase II transcription	47	2	2.05659	0.262686	0.371167
GO:0045579	positive regulation of B cell differentiation	14	1	3.45214	0.264989	0.371635
GO:0071236	cellular response to antibiotic	14	1	3.45214	0.264989	0.371635
GO:0051770	positive regulation of nitric-oxide synthase biosynthetic process	14	1	3.45214	0.264989	0.371635
GO:0042993	positive regulation of transcription factor import into nucleus	14	1	3.45214	0.264989	0.371635
GO:0016045	detection of bacterium	14	1	3.45214	0.264989	0.371635
GO:1900745	positive regulation of p38MAPK cascade	14	1	3.45214	0.264989	0.371635
GO:0042633	hair cycle	14	1	3.45214	0.264989	0.371635
GO:0007340	acrosome reaction	14	1	3.45214	0.264989	0.371635
GO:0051482	positive regulation of cytosolic calcium ion concentration involved in phospholipase C-activating G-protein coupled signaling pathway	14	1	3.45214	0.264989	0.371635
GO:0043303	mast cell degranulation	14	1	3.45214	0.264989	0.371635
GO:0070208	protein heterotrimerization	14	1	3.45214	0.264989	0.371635
GO:0043409	negative regulation of MAPK cascade	14	1	3.45214	0.264989	0.371635
GO:0051693	actin filament capping	14	1	3.45214	0.264989	0.371635
GO:0001516	prostaglandin biosynthetic process	14	1	3.45214	0.264989	0.371635
GO:0045821	positive regulation of glycolytic process	14	1	3.45214	0.264989	0.371635
GO:0080182	histone H3-K4 trimethylation	14	1	3.45214	0.264989	0.371635
GO:0010875	positive regulation of cholesterol efflux	14	1	3.45214	0.264989	0.371635
GO:0008340	determination of adult lifespan	14	1	3.45214	0.264989	0.371635
GO:0019371	cyclooxygenase pathway	14	1	3.45214	0.264989	0.371635
GO:0016578	histone deubiquitination	14	1	3.45214	0.264989	0.371635
GO:0061053	somite development	14	1	3.45214	0.264989	0.371635
GO:0006275	regulation of DNA replication	14	1	3.45214	0.264989	0.371635
GO:0021591	ventricular system development	14	1	3.45214	0.264989	0.371635
GO:0006768	biotin metabolic process	14	1	3.45214	0.264989	0.371635
GO:2001241	positive regulation of extrinsic apoptotic signaling pathway in absence of ligand	14	1	3.45214	0.264989	0.371635
GO:0042311	vasodilation	14	1	3.45214	0.264989	0.371635
GO:0050995	negative regulation of lipid catabolic process	14	1	3.45214	0.264989	0.371635
GO:0006978	DNA damage response, signal transduction by p53 class mediator resulting in transcription of p21 class mediator	14	1	3.45214	0.264989	0.371635
GO:0008543	fibroblast growth factor receptor signaling pathway	292	8	1.32411	0.269156	0.376873
GO:0019048	modulation by virus of host morphology or physiology	48	2	2.01375	0.27023	0.377014
GO:0019985	translesion synthesis	48	2	2.01375	0.27023	0.377014
GO:0071560	cellular response to transforming growth factor beta stimulus	48	2	2.01375	0.27023	0.377014
GO:0042752	regulation of circadian rhythm	48	2	2.01375	0.27023	0.377014
GO:0030900	forebrain development	48	2	2.01375	0.27023	0.377014
GO:0001541	ovarian follicle development	48	2	2.01375	0.27023	0.377014
GO:0048812	neuron projection morphogenesis	48	2	2.01375	0.27023	0.377014
GO:1903955	positive regulation of protein targeting to mitochondrion	86	3	1.68593	0.271312	0.378069
GO:0050796	regulation of insulin secretion	86	3	1.68593	0.271312	0.378069
GO:0006897	endocytosis	126	4	1.53428	0.272623	0.379107
GO:0055085	transmembrane transport	643	16	1.20261	0.273144	0.379107
GO:0007254	JNK cascade	49	2	1.97265	0.277771	0.38484
GO:0048511	rhythmic process	49	2	1.97265	0.277771	0.38484
GO:0060292	long term synaptic depression	15	1	3.22199	0.279915	0.384979
GO:0061036	positive regulation of cartilage development	15	1	3.22199	0.279915	0.384979
GO:1901214	regulation of neuron death	15	1	3.22199	0.279915	0.384979
GO:0051276	chromosome organization	15	1	3.22199	0.279915	0.384979
GO:0051044	positive regulation of membrane protein ectodomain proteolysis	15	1	3.22199	0.279915	0.384979
GO:2000310	regulation of N-methyl-D-aspartate selective glutamate receptor activity	15	1	3.22199	0.279915	0.384979
GO:0001953	negative regulation of cell-matrix adhesion	15	1	3.22199	0.279915	0.384979
GO:0042026	protein refolding	15	1	3.22199	0.279915	0.384979
GO:0045742	positive regulation of epidermal growth factor receptor signaling pathway	15	1	3.22199	0.279915	0.384979
GO:0035458	cellular response to interferon-beta	15	1	3.22199	0.279915	0.384979
GO:0046328	regulation of JNK cascade	15	1	3.22199	0.279915	0.384979
GO:2000353	positive regulation of endothelial cell apoptotic process	15	1	3.22199	0.279915	0.384979
GO:0006646	phosphatidylethanolamine biosynthetic process	15	1	3.22199	0.279915	0.384979
GO:0031396	regulation of protein ubiquitination	15	1	3.22199	0.279915	0.384979
GO:0021542	dentate gyrus development	15	1	3.22199	0.279915	0.384979
GO:0036092	phosphatidylinositol-3-phosphate biosynthetic process	15	1	3.22199	0.279915	0.384979
GO:2000311	regulation of alpha-amino-3-hydroxy-5-methyl-4-isoxazole propionate selective glutamate receptor activity	15	1	3.22199	0.279915	0.384979
GO:0030902	hindbrain development	15	1	3.22199	0.279915	0.384979
GO:0048168	regulation of neuronal synaptic plasticity	15	1	3.22199	0.279915	0.384979
GO:0051895	negative regulation of focal adhesion assembly	15	1	3.22199	0.279915	0.384979
GO:0061136	regulation of proteasomal protein catabolic process	15	1	3.22199	0.279915	0.384979
GO:0050708	regulation of protein secretion	15	1	3.22199	0.279915	0.384979
GO:0000398	mRNA splicing, via spliceosome	211	6	1.37431	0.281335	0.386475
GO:0034138	toll-like receptor 3 signaling pathway	88	3	1.64761	0.282316	0.387061
GO:0090305	nucleic acid phosphodiester bond hydrolysis	88	3	1.64761	0.282316	0.387061
GO:0045727	positive regulation of translation	51	2	1.89529	0.292833	0.400118
GO:0042542	response to hydrogen peroxide	51	2	1.89529	0.292833	0.400118
GO:0035435	phosphate ion transmembrane transport	16	1	3.02062	0.294537	0.400118
GO:0030224	monocyte differentiation	16	1	3.02062	0.294537	0.400118
GO:0006349	regulation of gene expression by genetic imprinting	16	1	3.02062	0.294537	0.400118
GO:0032874	positive regulation of stress-activated MAPK cascade	16	1	3.02062	0.294537	0.400118
GO:0014850	response to muscle activity	16	1	3.02062	0.294537	0.400118
GO:0031103	axon regeneration	16	1	3.02062	0.294537	0.400118
GO:0030949	positive regulation of vascular endothelial growth factor receptor signaling pathway	16	1	3.02062	0.294537	0.400118
GO:0035994	response to muscle stretch	16	1	3.02062	0.294537	0.400118
GO:0030111	regulation of Wnt signaling pathway	16	1	3.02062	0.294537	0.400118
GO:0007158	neuron cell-cell adhesion	16	1	3.02062	0.294537	0.400118
GO:0048566	embryonic digestive tract development	16	1	3.02062	0.294537	0.400118
GO:2000778	positive regulation of interleukin-6 secretion	16	1	3.02062	0.294537	0.400118
GO:1990138	neuron projection extension	16	1	3.02062	0.294537	0.400118
GO:0010812	negative regulation of cell-substrate adhesion	16	1	3.02062	0.294537	0.400118
GO:0060334	regulation of interferon-gamma-mediated signaling pathway	16	1	3.02062	0.294537	0.400118
GO:0061178	regulation of insulin secretion involved in cellular response to glucose stimulus	16	1	3.02062	0.294537	0.400118
GO:0007405	neuroblast proliferation	16	1	3.02062	0.294537	0.400118
GO:0060037	pharyngeal system development	16	1	3.02062	0.294537	0.400118
GO:2000649	regulation of sodium ion transmembrane transporter activity	16	1	3.02062	0.294537	0.400118
GO:0006417	regulation of translation	52	2	1.85884	0.300347	0.406586
GO:0000902	cell morphogenesis	52	2	1.85884	0.300347	0.406586
GO:0030168	platelet activation	217	6	1.33631	0.302197	0.408613
GO:0019886	antigen processing and presentation of exogenous peptide antigen via MHC class II	92	3	1.57597	0.304423	0.411145
GO:0045454	cell redox homeostasis	92	3	1.57597	0.304423	0.411145
GO:0071346	cellular response to interferon-gamma	53	2	1.82377	0.307848	0.413614
GO:0006334	nucleosome assembly	134	4	1.44268	0.308792	0.413614
GO:0030500	regulation of bone mineralization	17	1	2.84294	0.308861	0.413614
GO:0007276	gamete generation	17	1	2.84294	0.308861	0.413614
GO:0071285	cellular response to lithium ion	17	1	2.84294	0.308861	0.413614
GO:0007004	telomere maintenance via telomerase	17	1	2.84294	0.308861	0.413614
GO:0006895	Golgi to endosome transport	17	1	2.84294	0.308861	0.413614
GO:0045089	positive regulation of innate immune response	17	1	2.84294	0.308861	0.413614
GO:0050909	sensory perception of taste	17	1	2.84294	0.308861	0.413614
GO:0007250	activation of NF-kappaB-inducing kinase activity	17	1	2.84294	0.308861	0.413614
GO:0043403	skeletal muscle tissue regeneration	17	1	2.84294	0.308861	0.413614
GO:0009948	anterior/posterior axis specification	17	1	2.84294	0.308861	0.413614
GO:0030048	actin filament-based movement	17	1	2.84294	0.308861	0.413614
GO:0048535	lymph node development	17	1	2.84294	0.308861	0.413614
GO:2000811	negative regulation of anoikis	17	1	2.84294	0.308861	0.413614
GO:0002690	positive regulation of leukocyte chemotaxis	17	1	2.84294	0.308861	0.413614
GO:0000920	cell separation after cytokinesis	17	1	2.84294	0.308861	0.413614
GO:0060828	regulation of canonical Wnt signaling pathway	17	1	2.84294	0.308861	0.413614
GO:0006939	smooth muscle contraction	17	1	2.84294	0.308861	0.413614
GO:0042310	vasoconstriction	17	1	2.84294	0.308861	0.413614
GO:0048568	embryonic organ development	17	1	2.84294	0.308861	0.413614
GO:0060384	innervation	17	1	2.84294	0.308861	0.413614
GO:2000249	regulation of actin cytoskeleton reorganization	17	1	2.84294	0.308861	0.413614
GO:0032026	response to magnesium ion	17	1	2.84294	0.308861	0.413614
GO:0048557	embryonic digestive tract morphogenesis	17	1	2.84294	0.308861	0.413614
GO:0048514	blood vessel morphogenesis	17	1	2.84294	0.308861	0.413614
GO:0010824	regulation of centrosome duplication	17	1	2.84294	0.308861	0.413614
GO:0030193	regulation of blood coagulation	17	1	2.84294	0.308861	0.413614
GO:0030198	extracellular matrix organization	307	8	1.25941	0.312757	0.418189
GO:0007368	determination of left/right symmetry	54	2	1.79	0.315332	0.421055
GO:0043087	regulation of GTPase activity	54	2	1.79	0.315332	0.421055
GO:0006364	rRNA processing	94	3	1.54244	0.315504	0.421055
GO:0030182	neuron differentiation	94	3	1.54244	0.315504	0.421055
GO:0050776	regulation of immune response	136	4	1.42147	0.317912	0.423943
GO:0061337	cardiac conduction	95	3	1.52621	0.321048	0.426913
GO:0045814	negative regulation of gene expression, epigenetic	95	3	1.52621	0.321048	0.426913
GO:0006469	negative regulation of protein kinase activity	95	3	1.52621	0.321048	0.426913
GO:0060271	cilium morphogenesis	55	2	1.75745	0.322797	0.426913
GO:0006892	post-Golgi vesicle-mediated transport	55	2	1.75745	0.322797	0.426913
GO:0009967	positive regulation of signal transduction	55	2	1.75745	0.322797	0.426913
GO:0007612	learning	55	2	1.75745	0.322797	0.426913
GO:0043406	positive regulation of MAP kinase activity	55	2	1.75745	0.322797	0.426913
GO:0001709	cell fate determination	18	1	2.68499	0.322894	0.426913
GO:0031032	actomyosin structure organization	18	1	2.68499	0.322894	0.426913
GO:0001782	B cell homeostasis	18	1	2.68499	0.322894	0.426913
GO:0048814	regulation of dendrite morphogenesis	18	1	2.68499	0.322894	0.426913
GO:0031290	retinal ganglion cell axon guidance	18	1	2.68499	0.322894	0.426913
GO:0042098	T cell proliferation	18	1	2.68499	0.322894	0.426913
GO:0008637	apoptotic mitochondrial changes	18	1	2.68499	0.322894	0.426913
GO:0048384	retinoic acid receptor signaling pathway	18	1	2.68499	0.322894	0.426913
GO:0042462	eye photoreceptor cell development	18	1	2.68499	0.322894	0.426913
GO:0071380	cellular response to prostaglandin E stimulus	18	1	2.68499	0.322894	0.426913
GO:1902236	negative regulation of endoplasmic reticulum stress-induced intrinsic apoptotic signaling pathway	18	1	2.68499	0.322894	0.426913
GO:0043171	peptide catabolic process	18	1	2.68499	0.322894	0.426913
GO:0006491	N-glycan processing	18	1	2.68499	0.322894	0.426913
GO:0000027	ribosomal large subunit assembly	18	1	2.68499	0.322894	0.426913
GO:0006796	phosphate-containing compound metabolic process	18	1	2.68499	0.322894	0.426913
GO:0045445	myoblast differentiation	18	1	2.68499	0.322894	0.426913
GO:0001556	oocyte maturation	18	1	2.68499	0.322894	0.426913
GO:0021772	olfactory bulb development	18	1	2.68499	0.322894	0.426913
GO:0050908	detection of light stimulus involved in visual perception	18	1	2.68499	0.322894	0.426913
GO:0008053	mitochondrial fusion	18	1	2.68499	0.322894	0.426913
GO:0031175	neuron projection development	96	3	1.51031	0.326591	0.431311
GO:0006766	vitamin metabolic process	138	4	1.40087	0.327051	0.431592
GO:0060395	SMAD protein signal transduction	56	2	1.72607	0.33024	0.43547
GO:0007266	Rho protein signal transduction	56	2	1.72607	0.33024	0.43547
GO:0006979	response to oxidative stress	97	3	1.49474	0.332134	0.437718
GO:0038095	Fc-epsilon receptor signaling pathway	315	8	1.22743	0.336559	0.439834
GO:0032094	response to food	19	1	2.54368	0.336641	0.439834
GO:0033198	response to ATP	19	1	2.54368	0.336641	0.439834
GO:1900087	positive regulation of G1/S transition of mitotic cell cycle	19	1	2.54368	0.336641	0.439834
GO:0046716	muscle cell cellular homeostasis	19	1	2.54368	0.336641	0.439834
GO:0070987	error-free translesion synthesis	19	1	2.54368	0.336641	0.439834
GO:0097150	neuronal stem cell population maintenance	19	1	2.54368	0.336641	0.439834
GO:0032332	positive regulation of chondrocyte differentiation	19	1	2.54368	0.336641	0.439834
GO:0071480	cellular response to gamma radiation	19	1	2.54368	0.336641	0.439834
GO:0043393	regulation of protein binding	19	1	2.54368	0.336641	0.439834
GO:0002028	regulation of sodium ion transport	19	1	2.54368	0.336641	0.439834
GO:0045861	negative regulation of proteolysis	19	1	2.54368	0.336641	0.439834
GO:0060324	face development	19	1	2.54368	0.336641	0.439834
GO:0010765	positive regulation of sodium ion transport	19	1	2.54368	0.336641	0.439834
GO:0016601	Rac protein signal transduction	19	1	2.54368	0.336641	0.439834
GO:0070584	mitochondrion morphogenesis	19	1	2.54368	0.336641	0.439834
GO:0097421	liver regeneration	19	1	2.54368	0.336641	0.439834
GO:0001659	temperature homeostasis	19	1	2.54368	0.336641	0.439834
GO:0045333	cellular respiration	19	1	2.54368	0.336641	0.439834
GO:2000377	regulation of reactive oxygen species metabolic process	19	1	2.54368	0.336641	0.439834
GO:0035066	positive regulation of histone acetylation	19	1	2.54368	0.336641	0.439834
GO:0006959	humoral immune response	57	2	1.69579	0.33766	0.440606
GO:0021766	hippocampus development	57	2	1.69579	0.33766	0.440606
GO:0043488	regulation of mRNA stability	99	3	1.46454	0.343211	0.44758
GO:0097191	extrinsic apoptotic signaling pathway	58	2	1.66655	0.345054	0.449143
GO:0051216	cartilage development	58	2	1.66655	0.345054	0.449143
GO:0016266	O-glycan processing	58	2	1.66655	0.345054	0.449143
GO:0071407	cellular response to organic cyclic compound	58	2	1.66655	0.345054	0.449143
GO:0019233	sensory perception of pain	58	2	1.66655	0.345054	0.449143
GO:0090316	positive regulation of intracellular protein transport	20	1	2.41649	0.350108	0.453437
GO:0001731	formation of translation preinitiation complex	20	1	2.41649	0.350108	0.453437
GO:0071108	protein K48-linked deubiquitination	20	1	2.41649	0.350108	0.453437
GO:0010039	response to iron ion	20	1	2.41649	0.350108	0.453437
GO:0016239	positive regulation of macroautophagy	20	1	2.41649	0.350108	0.453437
GO:0042474	middle ear morphogenesis	20	1	2.41649	0.350108	0.453437
GO:0007520	myoblast fusion	20	1	2.41649	0.350108	0.453437
GO:0071157	negative regulation of cell cycle arrest	20	1	2.41649	0.350108	0.453437
GO:0006401	RNA catabolic process	20	1	2.41649	0.350108	0.453437
GO:0045332	phospholipid translocation	20	1	2.41649	0.350108	0.453437
GO:0031297	replication fork processing	20	1	2.41649	0.350108	0.453437
GO:0031954	positive regulation of protein autophosphorylation	20	1	2.41649	0.350108	0.453437
GO:0006699	bile acid biosynthetic process	20	1	2.41649	0.350108	0.453437
GO:0090102	cochlea development	20	1	2.41649	0.350108	0.453437
GO:0070207	protein homotrimerization	20	1	2.41649	0.350108	0.453437
GO:0007026	negative regulation of microtubule depolymerization	20	1	2.41649	0.350108	0.453437
GO:0046330	positive regulation of JNK cascade	59	2	1.6383	0.35242	0.455585
GO:0045665	negative regulation of neuron differentiation	59	2	1.6383	0.35242	0.455585
GO:0050790	regulation of catalytic activity	59	2	1.6383	0.35242	0.455585
GO:0051289	protein homotetramerization	59	2	1.6383	0.35242	0.455585
GO:0001764	neuron migration	101	3	1.43554	0.354272	0.45747
GO:0045669	positive regulation of osteoblast differentiation	60	2	1.611	0.359756	0.46318
GO:0000226	microtubule cytoskeleton organization	60	2	1.611	0.359756	0.46318
GO:0006968	cellular defense response	60	2	1.611	0.359756	0.46318
GO:0045732	positive regulation of protein catabolic process	60	2	1.611	0.359756	0.46318
GO:0042730	fibrinolysis	21	1	2.30142	0.363301	0.46533
GO:0060412	ventricular septum morphogenesis	21	1	2.30142	0.363301	0.46533
GO:0001954	positive regulation of cell-matrix adhesion	21	1	2.30142	0.363301	0.46533
GO:2000463	positive regulation of excitatory postsynaptic potential	21	1	2.30142	0.363301	0.46533
GO:0034113	heterotypic cell-cell adhesion	21	1	2.30142	0.363301	0.46533
GO:0006997	nucleus organization	21	1	2.30142	0.363301	0.46533
GO:0055007	cardiac muscle cell differentiation	21	1	2.30142	0.363301	0.46533
GO:0035249	synaptic transmission, glutamatergic	21	1	2.30142	0.363301	0.46533
GO:0071398	cellular response to fatty acid	21	1	2.30142	0.363301	0.46533
GO:0007369	gastrulation	21	1	2.30142	0.363301	0.46533
GO:0035902	response to immobilization stress	21	1	2.30142	0.363301	0.46533
GO:0005980	glycogen catabolic process	21	1	2.30142	0.363301	0.46533
GO:0008361	regulation of cell size	21	1	2.30142	0.363301	0.46533
GO:0039702	viral budding via host ESCRT complex	21	1	2.30142	0.363301	0.46533
GO:0045671	negative regulation of osteoclast differentiation	21	1	2.30142	0.363301	0.46533
GO:0030879	mammary gland development	21	1	2.30142	0.363301	0.46533
GO:0033209	tumor necrosis factor-mediated signaling pathway	146	4	1.32411	0.363695	0.46533
GO:0007155	cell adhesion	415	10	1.16458	0.364965	0.466099
GO:0016525	negative regulation of angiogenesis	61	2	1.58459	0.367061	0.467151
GO:0009611	response to wounding	61	2	1.58459	0.367061	0.467151
GO:0006303	double-strand break repair via nonhomologous end joining	61	2	1.58459	0.367061	0.467151
GO:0001933	negative regulation of protein phosphorylation	61	2	1.58459	0.367061	0.467151
GO:0034220	ion transmembrane transport	237	6	1.22354	0.373213	0.47446
GO:0016197	endosomal transport	62	2	1.55903	0.374333	0.475364
GO:0014068	positive regulation of phosphatidylinositol 3-kinase signaling	62	2	1.55903	0.374333	0.475364
GO:0060173	limb development	22	1	2.19681	0.376226	0.475602
GO:0045921	positive regulation of exocytosis	22	1	2.19681	0.376226	0.475602
GO:0007088	regulation of mitotic nuclear division	22	1	2.19681	0.376226	0.475602
GO:0071353	cellular response to interleukin-4	22	1	2.19681	0.376226	0.475602
GO:0017157	regulation of exocytosis	22	1	2.19681	0.376226	0.475602
GO:0008037	cell recognition	22	1	2.19681	0.376226	0.475602
GO:0072661	protein targeting to plasma membrane	22	1	2.19681	0.376226	0.475602
GO:0045987	positive regulation of smooth muscle contraction	22	1	2.19681	0.376226	0.475602
GO:0070536	protein K63-linked deubiquitination	22	1	2.19681	0.376226	0.475602
GO:0048844	artery morphogenesis	22	1	2.19681	0.376226	0.475602
GO:0000715	nucleotide-excision repair, DNA damage recognition	22	1	2.19681	0.376226	0.475602
GO:0000070	mitotic sister chromatid segregation	22	1	2.19681	0.376226	0.475602
GO:0032148	activation of protein kinase B activity	22	1	2.19681	0.376226	0.475602
GO:0003333	amino acid transmembrane transport	22	1	2.19681	0.376226	0.475602
GO:0009880	embryonic pattern specification	22	1	2.19681	0.376226	0.475602
GO:0034047	regulation of protein phosphatase type 2A activity	22	1	2.19681	0.376226	0.475602
GO:0001836	release of cytochrome c from mitochondria	22	1	2.19681	0.376226	0.475602
GO:0001816	cytokine production	22	1	2.19681	0.376226	0.475602
GO:0071542	dopaminergic neuron differentiation	22	1	2.19681	0.376226	0.475602
GO:0042246	tissue regeneration	22	1	2.19681	0.376226	0.475602
GO:0000082	G1/S transition of mitotic cell cycle	151	4	1.28026	0.386563	0.486324
GO:0035019	somatic stem cell population maintenance	64	2	1.51031	0.388769	0.486324
GO:0046580	negative regulation of Ras protein signal transduction	23	1	2.1013	0.388888	0.486324
GO:0036152	phosphatidylethanolamine acyl-chain remodeling	23	1	2.1013	0.388888	0.486324
GO:0000083	regulation of transcription involved in G1/S transition of mitotic cell cycle	23	1	2.1013	0.388888	0.486324
GO:0007214	gamma-aminobutyric acid signaling pathway	23	1	2.1013	0.388888	0.486324
GO:0045662	negative regulation of myoblast differentiation	23	1	2.1013	0.388888	0.486324
GO:0046907	intracellular transport	23	1	2.1013	0.388888	0.486324
GO:0015914	phospholipid transport	23	1	2.1013	0.388888	0.486324
GO:0050772	positive regulation of axonogenesis	23	1	2.1013	0.388888	0.486324
GO:0030099	myeloid cell differentiation	23	1	2.1013	0.388888	0.486324
GO:0006281	DNA repair	380	9	1.14466	0.394294	0.488177
GO:0008306	associative learning	24	1	2.01375	0.401292	0.495609
GO:0030511	positive regulation of transforming growth factor beta receptor signaling pathway	24	1	2.01375	0.401292	0.495609
GO:0032201	telomere maintenance via semi-conservative replication	24	1	2.01375	0.401292	0.495609
GO:0090398	cellular senescence	24	1	2.01375	0.401292	0.495609
GO:0060976	coronary vasculature development	24	1	2.01375	0.401292	0.495609
GO:0051899	membrane depolarization	24	1	2.01375	0.401292	0.495609
GO:0060397	JAK-STAT cascade involved in growth hormone signaling pathway	24	1	2.01375	0.401292	0.495609
GO:0007274	neuromuscular synaptic transmission	24	1	2.01375	0.401292	0.495609
GO:0031122	cytoplasmic microtubule organization	24	1	2.01375	0.401292	0.495609
GO:0007269	neurotransmitter secretion	66	2	1.46454	0.403054	0.497256
GO:0000723	telomere maintenance	66	2	1.46454	0.403054	0.497256
GO:0007265	Ras protein signal transduction	246	6	1.17878	0.405419	0.499644
GO:0038061	NIK/NF-kappaB signaling	67	2	1.44268	0.410135	0.504832
GO:0035556	intracellular signal transduction	386	9	1.12686	0.411316	0.505482
GO:0007569	cell aging	25	1	1.9332	0.413443	0.506668
GO:0071158	positive regulation of cell cycle arrest	25	1	1.9332	0.413443	0.506668
GO:0042327	positive regulation of phosphorylation	25	1	1.9332	0.413443	0.506668
GO:0005978	glycogen biosynthetic process	25	1	1.9332	0.413443	0.506668
GO:0090503	RNA phosphodiester bond hydrolysis, exonucleolytic	25	1	1.9332	0.413443	0.506668
GO:0048863	stem cell differentiation	25	1	1.9332	0.413443	0.506668
GO:0045070	positive regulation of viral genome replication	25	1	1.9332	0.413443	0.506668
GO:0000289	nuclear-transcribed mRNA poly(A) tail shortening	25	1	1.9332	0.413443	0.506668
GO:0000281	mitotic cytokinesis	25	1	1.9332	0.413443	0.506668
GO:0032715	negative regulation of interleukin-6 production	25	1	1.9332	0.413443	0.506668
GO:0060349	bone morphogenesis	25	1	1.9332	0.413443	0.506668
GO:0009966	regulation of signal transduction	25	1	1.9332	0.413443	0.506668
GO:0050871	positive regulation of B cell activation	25	1	1.9332	0.413443	0.506668
GO:0070423	nucleotide-binding oligomerization domain containing signaling pathway	25	1	1.9332	0.413443	0.506668
GO:0034341	response to interferon-gamma	25	1	1.9332	0.413443	0.506668
GO:0006810	transport	296	7	1.14294	0.419109	0.5128
GO:0034765	regulation of ion transmembrane transport	113	3	1.28309	0.419827	0.513139
GO:0006914	autophagy	113	3	1.28309	0.419827	0.513139
GO:0034146	toll-like receptor 5 signaling pathway	69	2	1.40087	0.424171	0.517618
GO:0034166	toll-like receptor 10 signaling pathway	69	2	1.40087	0.424171	0.517618
GO:0070098	chemokine-mediated signaling pathway	69	2	1.40087	0.424171	0.517618
GO:0006336	DNA replication-independent nucleosome assembly	26	1	1.85884	0.425348	0.517618
GO:0006656	phosphatidylcholine biosynthetic process	26	1	1.85884	0.425348	0.517618
GO:0032735	positive regulation of interleukin-12 production	26	1	1.85884	0.425348	0.517618
GO:0045840	positive regulation of mitotic nuclear division	26	1	1.85884	0.425348	0.517618
GO:0002376	immune system process	26	1	1.85884	0.425348	0.517618
GO:0048678	response to axon injury	26	1	1.85884	0.425348	0.517618
GO:0051881	regulation of mitochondrial membrane potential	26	1	1.85884	0.425348	0.517618
GO:0040014	regulation of multicellular organism growth	26	1	1.85884	0.425348	0.517618
GO:0000096	sulfur amino acid metabolic process	26	1	1.85884	0.425348	0.517618
GO:0031069	hair follicle morphogenesis	26	1	1.85884	0.425348	0.517618
GO:0036151	phosphatidylcholine acyl-chain remodeling	26	1	1.85884	0.425348	0.517618
GO:0030449	regulation of complement activation	26	1	1.85884	0.425348	0.517618
GO:0001958	endochondral ossification	26	1	1.85884	0.425348	0.517618
GO:0006879	cellular iron ion homeostasis	70	2	1.38085	0.431123	0.52428
GO:0043085	positive regulation of catalytic activity	70	2	1.38085	0.431123	0.52428
GO:0048011	neurotrophin TRK receptor signaling pathway	395	9	1.10119	0.436815	0.526662
GO:0014911	positive regulation of smooth muscle cell migration	27	1	1.79	0.43701	0.526662
GO:0030100	regulation of endocytosis	27	1	1.79	0.43701	0.526662
GO:0006378	mRNA polyadenylation	27	1	1.79	0.43701	0.526662
GO:0001656	metanephros development	27	1	1.79	0.43701	0.526662
GO:0043029	T cell homeostasis	27	1	1.79	0.43701	0.526662
GO:0035329	hippo signaling	27	1	1.79	0.43701	0.526662
GO:0045746	negative regulation of Notch signaling pathway	27	1	1.79	0.43701	0.526662
GO:0006910	phagocytosis, recognition	27	1	1.79	0.43701	0.526662
GO:0014047	glutamate secretion	27	1	1.79	0.43701	0.526662
GO:0032200	telomere organization	27	1	1.79	0.43701	0.526662
GO:0006487	protein N-linked glycosylation	27	1	1.79	0.43701	0.526662
GO:0045214	sarcomere organization	27	1	1.79	0.43701	0.526662
GO:0009306	protein secretion	27	1	1.79	0.43701	0.526662
GO:0060079	excitatory postsynaptic potential	27	1	1.79	0.43701	0.526662
GO:0000077	DNA damage checkpoint	27	1	1.79	0.43701	0.526662
GO:0070979	protein K11-linked ubiquitination	27	1	1.79	0.43701	0.526662
GO:0009060	aerobic respiration	27	1	1.79	0.43701	0.526662
GO:0016339	calcium-dependent cell-cell adhesion via plasma membrane cell adhesion molecules	27	1	1.79	0.43701	0.526662
GO:0006406	mRNA export from nucleus	71	2	1.36141	0.438029	0.526662
GO:0042391	regulation of membrane potential	71	2	1.36141	0.438029	0.526662
GO:0007411	axon guidance	537	12	1.08	0.439449	0.526662
GO:0040029	regulation of gene expression, epigenetic	117	3	1.23923	0.441204	0.528157
GO:0006468	protein phosphorylation	446	10	1.08363	0.447723	0.534062
GO:0006611	protein export from nucleus	28	1	1.72607	0.448435	0.534062
GO:0003281	ventricular septum development	28	1	1.72607	0.448435	0.534062
GO:0001707	mesoderm formation	28	1	1.72607	0.448435	0.534062
GO:0032689	negative regulation of interferon-gamma production	28	1	1.72607	0.448435	0.534062
GO:0051281	positive regulation of release of sequestered calcium ion into cytosol	28	1	1.72607	0.448435	0.534062
GO:0090200	positive regulation of release of cytochrome c from mitochondria	28	1	1.72607	0.448435	0.534062
GO:0006270	DNA replication initiation	28	1	1.72607	0.448435	0.534062
GO:0050999	regulation of nitric-oxide synthase activity	28	1	1.72607	0.448435	0.534062
GO:0019228	neuronal action potential	28	1	1.72607	0.448435	0.534062
GO:0061418	regulation of transcription from RNA polymerase II promoter in response to hypoxia	28	1	1.72607	0.448435	0.534062
GO:0001654	eye development	28	1	1.72607	0.448435	0.534062
GO:0035774	positive regulation of insulin secretion involved in cellular response to glucose stimulus	28	1	1.72607	0.448435	0.534062
GO:0060338	regulation of type I interferon-mediated signaling pathway	28	1	1.72607	0.448435	0.534062
GO:0042476	odontogenesis	28	1	1.72607	0.448435	0.534062
GO:0006513	protein monoubiquitination	28	1	1.72607	0.448435	0.534062
GO:0051924	regulation of calcium ion transport	28	1	1.72607	0.448435	0.534062
GO:0043086	negative regulation of catalytic activity	73	2	1.32411	0.451701	0.537032
GO:0006935	chemotaxis	119	3	1.2184	0.451775	0.537032
GO:0018105	peptidyl-serine phosphorylation	119	3	1.2184	0.451775	0.537032
GO:0071456	cellular response to hypoxia	119	3	1.2184	0.451775	0.537032
GO:0097190	apoptotic signaling pathway	120	3	1.20825	0.457029	0.542151
GO:0007005	mitochondrion organization	74	2	1.30621	0.458464	0.542151
GO:0016236	macroautophagy	74	2	1.30621	0.458464	0.542151
GO:0006886	intracellular protein transport	167	4	1.1576	0.45862	0.542151
GO:0046034	ATP metabolic process	29	1	1.66655	0.459627	0.542151
GO:0030217	T cell differentiation	29	1	1.66655	0.459627	0.542151
GO:0030032	lamellipodium assembly	29	1	1.66655	0.459627	0.542151
GO:0014065	phosphatidylinositol 3-kinase signaling	29	1	1.66655	0.459627	0.542151
GO:0007032	endosome organization	29	1	1.66655	0.459627	0.542151
GO:0045787	positive regulation of cell cycle	29	1	1.66655	0.459627	0.542151
GO:0048167	regulation of synaptic plasticity	29	1	1.66655	0.459627	0.542151
GO:0090004	positive regulation of establishment of protein localization to plasma membrane	29	1	1.66655	0.459627	0.542151
GO:0086010	membrane depolarization during action potential	29	1	1.66655	0.459627	0.542151
GO:0021915	neural tube development	29	1	1.66655	0.459627	0.542151
GO:0070588	calcium ion transmembrane transport	121	3	1.19826	0.462262	0.542151
GO:0006629	lipid metabolic process	121	3	1.19826	0.462262	0.542151
GO:1900034	regulation of cellular response to heat	75	2	1.2888	0.465179	0.542151
GO:0035725	sodium ion transmembrane transport	75	2	1.2888	0.465179	0.542151
GO:0006362	transcription elongation from RNA polymerase I promoter	30	1	1.611	0.470592	0.546815
GO:0043928	exonucleolytic nuclear-transcribed mRNA catabolic process involved in deadenylation-dependent decay	30	1	1.611	0.470592	0.546815
GO:0048705	skeletal system morphogenesis	30	1	1.611	0.470592	0.546815
GO:0009968	negative regulation of signal transduction	30	1	1.611	0.470592	0.546815
GO:0051603	proteolysis involved in cellular protein catabolic process	30	1	1.611	0.470592	0.546815
GO:0032781	positive regulation of ATPase activity	30	1	1.611	0.470592	0.546815
GO:0050766	positive regulation of phagocytosis	30	1	1.611	0.470592	0.546815
GO:0007281	germ cell development	30	1	1.611	0.470592	0.546815
GO:0042771	intrinsic apoptotic signaling pathway in response to DNA damage by p53 class mediator	30	1	1.611	0.470592	0.546815
GO:0043552	positive regulation of phosphatidylinositol 3-kinase activity	30	1	1.611	0.470592	0.546815
GO:0036258	multivesicular body assembly	30	1	1.611	0.470592	0.546815
GO:0016477	cell migration	170	4	1.13717	0.471827	0.547357
GO:0038124	toll-like receptor TLR6:TLR2 signaling pathway	76	2	1.27184	0.471843	0.547357
GO:0038123	toll-like receptor TLR1:TLR2 signaling pathway	76	2	1.27184	0.471843	0.547357
GO:0034162	toll-like receptor 9 signaling pathway	76	2	1.27184	0.471843	0.547357
GO:0002230	positive regulation of defense response to virus by host	124	3	1.16927	0.477822	0.553831
GO:0006887	exocytosis	77	2	1.25532	0.478456	0.553831
GO:0009952	anterior/posterior pattern specification	77	2	1.25532	0.478456	0.553831
GO:0030324	lung development	77	2	1.25532	0.478456	0.553831
GO:0007346	regulation of mitotic cell cycle	77	2	1.25532	0.478456	0.553831
[truncated: 253 more rows]

## Sheet: Down_GO_Gene
Table SII. Gene Ontology enrichment analysis of differentially expressed genes between normal aortas and Marfan syndrome tissues.
[truncated: 3,980 more rows]
